# Supplementary material for: Characterization of the mechanism by which the RB/E2F pathway controls expression of the cancer genomic DNA deaminase APOBEC3B
Source: eLife. 2020 Sep 28;9:e61287. doi: 10.7554/eLife.61287 (PMC7553775; doi:10.7554/eLife.61287)
Supplement: Supplementary file 1. [file elife-61287-supp1.xlsx]

## Sheet: README
Roelofs et al. 2020
Supplementary Table S1
Table title	Description	Data source	Extra notes
Spearman corr A3B vs all genes	Output of Spearmans correlation between A3B and all other genes in TCGA-BRCA	TCGA-BRCA, accessed through UCSC Xenabrowser	Top 20 genes in bold, these genes included in analysis of Fig. 6b-d.
	Compares correlated genes with whether or not DREAM has been shown to bind (tables below)		Correlation based on Spearmans test of log2 transformed RNAseq RSEM normalized counts, normalized to TBP
DREAM chIP Muller 2014	Ouput of DREAM ChIP-seq performed Ordered by A3B correlation, 1=enriched, 0= not enriched	Litovchick et al, 2007 PMID: 17531812	First mention of DREAM bound to A3B in the literature
Muller 2014, all genes	Original file stating all sequenced genes and whether or not DREAM was bound	Müller et al, 2014, PMID: 25106871	Based on Litovchick et al, 2007 PMID: 17531812
Muller 2014, DREAM bound genes	Original file showing only DREAM bound genes	Müller et al, 2014, PMID: 25106871	Based on Litovchick et al, 2007 PMID: 17531812
Muller 2014, CDE-CHR	Original file showing which genes have DREAM bound and have conserved CHR element	Müller et al, 2014, PMID: 25106871	Not all CHR elements were detected. We identify that A3B has the element but this gene is not on the list.

## Sheet: Spearman corr A3B vs all genes
Gene	Correlation with A3B		DREAM		DREAM ChIP (Muller, 2014, NAR)		Bound by DREAM? (Muller)		DREAM and CHR? (Muller)
Top 20 genes (bold) are included in analyses of Fig. 6b-d	TCGA-BRCA, Spearman's				E2F4/LIN54/LIN9/p130		(Y=3/4 or 4/4, N/A= not in analysis)		(Y= present in CDE-CHR sheet
APOBEC3B	1		1111		1111		Y		N
GTSE1	0.631716		1111		1111		Y		Y
UBE2C	0.606866		1111		1111		Y		N
CDC45	0.602469		1111		1111		Y		N
CENPA	0.599741		1011		1011		Y		N			Breakdown of DREAM-bound genes correlated with A3B
CDCA8	0.596758		1111		1111		Y		N			Spearmans rho with A3B	DREAM bound?	Tally (abs.)	Tally (%)		DREAM and CHR?
CCNB2	0.594489		1111		1111		Y		N			Any rho	Y	741	4.37168		27	0.142887
KIF2C	0.594481		1111		1111		Y		Y				N	16209	95.6283		18869	99.8571
RAD51	0.593435		1111		1111		Y		N
TPX2	0.59166		1111		1111		Y		N			>0.60	Y	3	100		13	19.403
HJURP	0.591647		1111		1111		Y		N				N	0	0		54	80.597
MELK	0.588118		1011		1011		Y		Y			0.50-0.60	Y	90	86.5385		5	4.85437
KIFC1	0.585519		1111		1111		Y		N				N	14	13.4615		98	95.1456
CDC20	0.584572		1111		1111		Y		N			0.40-0.50	Y	64	60.9524		4	2.35294
PLK1	0.583955		1111		1111		Y		N				N	41	39.0476		166	97.6471
CDCA5	0.581307		1111		1111		Y		N			0.30-0.40	Y	79	26.1589		0	0
BUB1	0.581088		1111		1111		Y		Y				N	223	73.8411		519	100
FOXM1	0.58106		1011		1011		Y		Y			0.20-0.30	Y	91	9.37178		1	0.0819001
CCNA2	0.580624		1111		1111		Y		Y				N	880	90.6282		1220	99.9181
CEP55	0.577377		1111		1111		Y		N			0.10-0.20	Y	103	4.31504		2	0.0890869
DEPDC1B	0.575897		1111		1111		Y		N				N	2284	95.685		2243	99.9109
AURKA	0.575116		1111		1111		Y		N			0-0.10	Y	118	2.64396		2	0.0585995
CENPM	0.572998		1111		1111		Y		N				N	4345	97.356		3411	99.9414
MYBL2	0.5727		0000		0		N		N			_-0.1-0	Y	108	2.82427		0	0
APOBEC3A	0.569866		#N/A		#N/A		#N/A		N				N	3716	97.1757		3564	100
MCM10	0.568362		0011		11		N		N			_-0.2-0.1	Y	50	1.68011		0	0
NDC80	0.56771		1111		1111		Y		N				N	2926	98.3199		2845	100
NCAPH	0.56663		1111		1111		Y		N			_-0.3-0.2	Y	28	1.82887		0	0
E2F2	0.566588		1111		1111		Y		N				N	1503	98.1711		1993	100
KIF4A	0.566586		1111		1111		Y		N			_-0.4-0.3	Y	6	2.12014		0	0
SKA1	0.565752		1011		1011		Y		Y				N	277	97.8799		716	100
AURKB	0.565452		1111		1111		Y		Y			<0.40	Y	0	#DIV/0!		0	0
OIP5	0.564282		1111		1111		Y		N				N	0	#DIV/0!		73	100
BIRC5	0.564238		1111		1111		Y		N
SGOL1	0.563918		1111		1111		Y		N
DLGAP5	0.560843		1111		1111		Y		N
CDCA3	0.559821		1111		1111		Y		Y
FAM83D	0.559573		1111		1111		Y		N
WDR62	0.558598		1111		1111		Y		N
NUSAP1	0.556437		1111		1111		Y		N
CDK1	0.55596		1111		1111		Y		Y
PTTG1	0.555928		1111		1111		Y		N
KPNA2	0.554264		1111		1111		Y		N
FAM64A	0.55367		1111		1111		Y		N
PRC1	0.553076		1111		1111		Y		N
NCAPG	0.552898		1011		1011		Y		N
FAM54A	0.552722		#N/A		#N/A		#N/A		N
RAD54L	0.550896		1111		1111		Y		Y
MAD2L1	0.549546		1111		1111		Y		N
ORC1L	0.548959		#N/A		#N/A		#N/A		N
CDKN3	0.545417		1111		1111		Y		N
C15orf42	0.545205		1111		1111		Y		N
LMNB1	0.544756		1111		1111		Y		N
CENPN	0.544565		1011		1011		Y		N
DEPDC1	0.544404		1111		1111		Y		N
SHCBP1	0.544229		1111		1111		Y		Y
BUB1B	0.543273		1111		1111		Y		N
TRIP13	0.542195		1011		1011		Y		N
TROAP	0.540947		1111		1111		Y		N
TCF19	0.540721		1111		1111		Y		N
ASF1B	0.540197		1011		1011		Y		N
RRM2	0.539637		1111		1111		Y		N
KIF23	0.539144		1011		1011		Y		N
ORC6L	0.53885		#N/A		#N/A		#N/A		N
CCNB1	0.538484		1111		1111		Y		N
CDC25C	0.537529		1111		1111		Y		Y
CDC25A	0.537421		1111		1111		Y		N
TYMS	0.536634		0000		0		N		N
KIF18B	0.535865		0000		0		N		N
E2F1	0.535331		0000		0		N		N
SPC25	0.535043		1111		1111		Y		N
CKAP2L	0.5341		1111		1111		Y		N
ARHGAP11A	0.533007		1111		1111		Y		N
TTK	0.531912		1111		1111		Y		N
KIF20A	0.531423		1111		1111		Y		N
SKA3	0.529031		1111		1111		Y		N
EXO1	0.526789		1111		1111		Y		N
MKI67	0.526509		1011		1011		Y		N
FANCA	0.525664		0000		0		N		N
MND1	0.525493		1011		1011		Y		Y
ANLN	0.523571		1111		1111		Y		N
UBE2T	0.523021		1111		1111		Y		N
STIL	0.522198		1111		1111		Y		N
STMN1	0.521611		0000		0		N		N
E2F8	0.521033		0011		11		N		N
BLM	0.519572		1111		1111		Y		N
DSCC1	0.519437		1011		1011		Y		N
CENPO	0.517525		1111		1111		Y		N
RAD51AP1	0.517513		1111		1111		Y		N
GSG2	0.517096		1111		1111		Y		N
ERCC6L	0.516869		0000		0		N		N
NUF2	0.515912		1111		1111		Y		N
IQGAP3	0.515884		1111		1111		Y		Y
FAM72B	0.51577		#N/A		#N/A		#N/A		N
SPAG5	0.515523		1111		1111		Y		N
H2AFZ	0.515258		1011		1011		Y		N
POLQ	0.51235		1111		1111		Y		N
NEIL3	0.511968		1111		1111		Y		Y
C1orf135	0.511012		#N/A		#N/A		#N/A		N
DIAPH3	0.5106		1111		1111		Y		N
CENPW	0.510554		0000		0		N		N
CDT1	0.509582		0000		0		N		N
TACC3	0.508654		0000		0		N		N
CDCA2	0.506971		1111		1111		Y		N
C12orf48	0.50658		#N/A		#N/A		#N/A		N
GINS3	0.506049		1111		1111		Y		N
ZWINT	0.50479		1111		1111		Y		N
KIF11	0.504109		1111		1111		Y		N
MCM6	0.503904		0010		10		N		N
RACGAP1	0.503701		1111		1111		Y		N
ZNF367	0.502948		1011		1011		Y		N
KIF15	0.502312		1111		1111		Y		N
TUBA1C	0.502098		0000		0		N		N
NEK2	0.500901		1111		1111		Y		N
KIF18A	0.50066		1111		1111		Y		N
ASPM	0.499738		1111		1111		Y		N
CENPI	0.498237		0000		0		N		N
KIAA1524	0.49812		1111		1111		Y		N
ESPL1	0.494122		1111		1111		Y		Y
FANCI	0.491611		1011		1011		Y		N
PKMYT1	0.491274		0000		0		N		N
FEN1	0.489928		1111		1111		Y		N
C15orf23	0.489055		0010		10		N		N
MCM2	0.488202		1011		1011		Y		N
MCM5	0.487743		1111		1111		Y		N
CKS2	0.486654		1011		1011		Y		N
FAM72A	0.485224		#N/A		#N/A		#N/A		N
TUBA1B	0.48516		0000		0		N		N
PCNA	0.484437		1111		1111		Y		N
HMMR	0.483415		1111		1111		Y		N
POC1A	0.483114		1111		1111		Y		N
CENPE	0.481301		1111		1111		Y		N
CHAF1B	0.481124		0000		0		N		N
CCNE1	0.480347		0000		0		N		N
PLK4	0.479219		1111		1111		Y		N
PPIL5	0.477253		#N/A		#N/A		#N/A		N
CDC6	0.477109		1111		1111		Y		N
TK1	0.476999		1111		1111		Y		N
KIF14	0.475944		1111		1111		Y		Y
MLF1IP	0.474967		1111		1111		Y		N
DSN1	0.4749		1011		1011		Y		N
CLSPN	0.473287		1011		1011		Y		N
CENPF	0.472714		1111		1111		Y		N
CDC25B	0.471626		1011		1011		Y		N
GINS1	0.470536		1111		1111		Y		N
C9orf100	0.469667		1011		1011		Y		N
UHRF1	0.469503		#N/A		#N/A		#N/A		N
RANBP1	0.467995		0010		10		N		N
CHEK1	0.466016		1111		1111		Y		N
FAM72D	0.461966		#N/A		#N/A		#N/A		N
C9orf140	0.461902		0010		10		N		N
KIF4B	0.461124		0011		11		N		N
TOP2A	0.460427		1111		1111		Y		N
TUBB	0.459552		0011		11		N		N
PBK	0.457228		1111		1111		Y		N
UBE2S	0.457109		1111		1111		Y		N
DONSON	0.45674		0000		0		N		N
CIT	0.455939		1111		1111		Y		N
DBF4	0.45355		1011		1011		Y		N
GPSM2	0.452093		0010		10		N		N
PIF1	0.451202		1111		1111		Y		N
CCNE2	0.451186		0000		0		N		N
C16orf61	0.449785		#N/A		#N/A		#N/A		N
FBXO5	0.447895		1111		1111		Y		N
PRR11	0.446506		#N/A		#N/A		#N/A		N
HMGB2	0.446019		1111		1111		Y		N
SPC24	0.445655		1011		1011		Y		N
CHEK2	0.445372		1111		1111		Y		N
EZH2	0.444114		0000		0		N		N
LRP8	0.444076		0000		0		N		N
ZNF695	0.444047		0000		0		N		N
FAM111B	0.442562		1011		1011		Y		N
EME1	0.442401		1111		1111		Y		N
EME1	0.441684		1111		1111		Y		N
CKS1B	0.44091		1111		1111		Y		Y
SGOL2	0.440125		1111		1111		Y		N
MCM3	0.439546		1011		1011		Y		N
ATAD2	0.438976		1111		1111		Y		N
MASTL	0.438322		1111		1111		Y		N
DDX39	0.437635		#N/A		#N/A		#N/A		N
SNRPA1	0.436066		0000		0		N		N
CTPS	0.435834		0000		0		N		N
CTSL2	0.435506		0000		0		N		N
WDR67	0.434921		1011		1011		Y		N
PHF5A	0.433702		0000		0		N		N
KIAA0101	0.433182		1111		1111		Y		N
DTL	0.43311		1111		1111		Y		N
FANCB	0.432152		1111		1111		Y		N
INCENP	0.430897		1111		1111		Y		N
PDXP	0.430774		#N/A		#N/A		#N/A		N
FANCD2	0.429946		1111		1111		Y		N
NCAPD2	0.42986		1011		1011		Y		N
NCAPG2	0.429016		1111		1111		Y		N
CDC7	0.428978		1011		1011		Y		N
C17orf53	0.427714		#N/A		#N/A		#N/A		N
HAUS8	0.427643		1111		1111		Y		N
E2F7	0.42754		0010		10		N		N
RAD54B	0.42712		1111		1111		Y		N
ARHGAP11B	0.426155		1111		1111		Y		N
C20orf24	0.425484		#N/A		#N/A		#N/A		N
COQ2	0.42408		0000		0		N		N
RECQL4	0.423373		0000		0		N		N
POP1	0.423072		0000		0		N		N
TIMELESS	0.420541		1011		1011		Y		N
VRK1	0.420164		0011		11		N		N
RFC4	0.419794		1011		1011		Y		N
RCC1	0.419335		0000		0		N		N
CCT5	0.418113		1000		1000		N		N
NFKBIL2	0.418013		#N/A		#N/A		#N/A		N
LMNB2	0.417674		0000		0		N		N
MCM7	0.417341		1111		1111		Y		N
SLC25A19	0.415624		0011		11		N		N
C16orf75	0.414369		#N/A		#N/A		#N/A		N
SLC7A5	0.413274		0000		0		N		N
CASC5	0.413043		1111		1111		Y		N
TMEM189	0.412957		#N/A		#N/A		#N/A		N
MCM4	0.41152		1111		1111		Y		N
NUDT5	0.411469		0000		0		N		N
DNAJC9	0.411303		0011		11		N		N
ECT2	0.411295		0000		0		N		N
ECT2	0.410182		0000		0		N		N
C5orf34	0.409694		#N/A		#N/A		#N/A		N
RAN	0.409214		0000		0		N		N
POLE2	0.408922		1111		1111		Y		N
PSRC1	0.408387		0010		10		N		N
THOC4	0.408268		#N/A		#N/A		#N/A		N
PDSS1	0.408038		0000		0		N		N
CENPL	0.406167		1111		1111		Y		N
CCDC99	0.406145		1111		1111		Y		N
HN1	0.405699		0011		11		N		N
C4orf46	0.405462		#N/A		#N/A		#N/A		N
DNMT3B	0.403791		1011		1011		Y		N
NUP93	0.403672		0011		11		N		N
SUV39H2	0.403027		0000		0		N		N
TMPO	0.402515		1111		1111		Y		N
MTHFD2	0.401427		0000		0		N		N
C11orf82	0.399184		1111		1111		Y		N
WDR76	0.399086		#N/A		#N/A		#N/A		N
DNA2	0.398335		1111		1111		Y		N
GINS2	0.397413		0011		11		N		N
RNASEH2A	0.395811		1011		1011		Y		N
RTKN2	0.395285		1111		1111		Y		N
ADSL	0.394403		0000		0		N		N
CCDC150	0.394143		#N/A		#N/A		#N/A		N
SMC4	0.392781		1111		1111		Y		N
YARS	0.391614		0000		0		N		N
RFC2	0.391432		0000		0		N		N
PSMA7	0.391243		0000		0		N		N
GMNN	0.390879		1111		1111		Y		N
POLR2D	0.390789		0000		0		N		N
SLC25A5	0.390732		#N/A		#N/A		#N/A		N
HELLS	0.390435		1111		1111		Y		N
ECE2	0.389197		0000		0		N		N
CCDC18	0.389079		#N/A		#N/A		#N/A		N
XRCC6	0.38906		0000		0		N		N
C13orf34	0.388888		#N/A		#N/A		#N/A		N
PRIM2	0.388646		1011		1011		Y		N
FAM136A	0.388601		0000		0		N		N
EBP	0.387804		0000		0		N		N
CBX2	0.387719		0000		0		N		N
SHMT2	0.387442		0000		0		N		N
UFD1L	0.387292		1111		1111		Y		N
PSMD14	0.386825		0010		10		N		N
CENPK	0.386737		1111		1111		Y		N
EIF2S2	0.386475		0000		0		N		N
GINS4	0.386004		1011		1011		Y		N
PNP	0.385837		0000		0		N		N
PIR	0.385073		0000		0		N		N
PHF19	0.384261		0000		0		N		N
SUV39H1	0.383189		0000		0		N		N
EIF2S2	0.382954		0000		0		N		N
TRAIP	0.381744		1111		1111		Y		N
GPR172A	0.381282		0000		0		N		N
PSMB2	0.380403		0000		0		N		N
GTPBP4	0.380194		0000		0		N		N
CDC123	0.37991		0000		0		N		N
ESCO2	0.37802		1111		1111		Y		Y
SQLE	0.377801		0000		0		N		N
WDHD1	0.377611		1111		1111		Y		N
CDKN2D	0.377147		1111		1111		Y		N
RHEBL1	0.377008		0010		10		N		N
RPN1	0.374369		0000		0		N		N
PGK1	0.37411		0000		0		N		N
HSPA14	0.373953		#N/A		#N/A		#N/A		N
AARS	0.373649		0000		0		N		N
PPM1G	0.373438		0000		0		N		N
C21orf45	0.372972		#N/A		#N/A		#N/A		N
EIF2C2	0.372851		0000		0		N		N
H2AFX	0.372029		1111		1111		Y		N
CKAP2	0.371944		1011		1011		Y		N
C6orf153	0.371839		#N/A		#N/A		#N/A		N
PSMD7	0.371599		0010		10		N		N
TOMM22	0.371246		0000		0		N		N
ZWILCH	0.371057		1111		1111		Y		N
SNRPG	0.370177		1011		1011		Y		N
DTYMK	0.368779		0010		10		N		N
GPRIN1	0.368425		0000		0		N		N
GMPS	0.368243		0000		0		N		N
BRIP1	0.366991		1011		1011		Y		N
DKC1	0.366498		0000		0		N		N
GEN1	0.365967		1111		1111		Y		N
ATP5C1	0.365378		0000		0		N		N
ACAT2	0.363991		0000		0		N		N
PPIL1	0.363931		0010		10		N		N
POLA2	0.363747		1111		1111		Y		N
SH3BP1	0.363314		0000		0		N		N
PSMD2	0.362213		0000		0		N		N
NRM	0.361908		0000		0		N		N
BEND3	0.361863		#N/A		#N/A		#N/A		N
RIPK2	0.360844		0000		0		N		N
MYBL1	0.360185		0000		0		N		N
HIST1H3B	0.359559		1111		1111		Y		N
PPPDE2	0.359461		#N/A		#N/A		#N/A		N
C13orf27	0.359298		#N/A		#N/A		#N/A		N
SAE1	0.35909		1111		1111		Y		N
ANP32B	0.358842		0000		0		N		N
ADM2	0.35852		0000		0		N		N
USP18	0.358265		0000		0		N		N
MARS	0.358141		0010		10		N		N
GGH	0.357881		1011		1011		Y		N
RFC3	0.35739		1111		1111		Y		N
DHCR7	0.357377		0000		0		N		N
TYRO3	0.356829		0000		0		N		N
KIF20B	0.356299		1111		1111		Y		Y
ENY2	0.356027		1011		1011		Y		N
TBC1D7	0.355995		0000		0		N		N
CHAF1A	0.355943		0011		11		N		N
RANGAP1	0.355732		1111		1111		Y		Y
MTBP	0.355564		1111		1111		Y		N
MTBP	0.355564		1111		1111		Y		N
MTBP	0.355564		1111		1111		Y		N
LSM2	0.354977		0000		0		N		N
CENPH	0.354828		1111		1111		Y		N
AIF1L	0.354772		0000		0		N		N
NUTF2	0.354606		0000		0		N		N
CSE1L	0.354358		1011		1011		Y		N
SEPHS1	0.35433		0001		1		N		N
GARS	0.354133		0000		0		N		N
RIBC2	0.353768		#N/A		#N/A		#N/A		N
DRG1	0.353458		0000		0		N		N
CCNF	0.352641		0000		0		N		N
CCT6A	0.352423		0010		10		N		N
EPCAM	0.352337		0000		0		N		N
RFWD3	0.352179		1111		1111		Y		N
XPO5	0.352005		0000		0		N		N
PSMD12	0.352001		0000		0		N		N
CNIH2	0.35136		0000		0		N		N
NIP7	0.351279		#N/A		#N/A		#N/A		N
TPI1	0.350843		0000		0		N		N
YWHAZ	0.350419		0000		0		N		N
XRCC2	0.350294		1111		1111		Y		N
LIN9	0.349261		1011		1011		Y		N
CEBPG	0.34925		0000		0		N		N
NDUFA6	0.349086		0000		0		N		N
FDPS	0.348678		0010		10		N		N
MRPL15	0.348399		0000		0		N		N
MRPL15	0.348399		0000		0		N		N
MRPL15	0.348399		0000		0		N		N
SNRPD1	0.34715		0000		0		N		N
LRRC59	0.347053		0000		0		N		N
LSR	0.346703		0000		0		N		N
SNRPD3	0.34664		#N/A		#N/A		#N/A		N
CDCA7	0.346561		1111		1111		Y		N
GPR19	0.346273		0000		0		N		N
ACTL6A	0.346264		0010		10		N		N
CHAC2	0.345954		0000		0		N		N
RBL1	0.345933		1111		1111		Y		N
TAF11	0.345319		1011		1011		Y		N
CBS	0.345227		0000		0		N		N
KNTC1	0.345186		1111		1111		Y		N
FANCG	0.344307		1111		1111		Y		N
C8orf76	0.344104		0000		0		N		N
BAK1	0.343986		0000		0		N		N
CHRNA5	0.343544		0000		0		N		N
MDH1	0.343479		1111		1111		Y		N
PSMA4	0.343455		0000		0		N		N
TDO2	0.342063		0000		0		N		N
ACOT7	0.342048		0000		0		N		N
COX4NB	0.34204		0000		0		N		N
CHAC1	0.34151		0000		0		N		N
DCLRE1B	0.341357		1011		1011		Y		N
WARS	0.340643		0000		0		N		N
YBX1	0.340274		0011		11		N		N
ILF2	0.340104		1010		1010		N		N
NUDT1	0.339988		1111		1111		Y		N
C16orf59	0.338828		#N/A		#N/A		#N/A		N
HSPD1	0.338567		0000		0		N		N
RBM17	0.338382		0000		0		N		N
FANCE	0.337895		0000		0		N		N
HDGF	0.337836		0010		10		N		N
NASP	0.337664		1011		1011		Y		N
PTMA	0.337389		0000		0		N		N
DHTKD1	0.337254		0000		0		N		N
CDCA4	0.337172		0000		0		N		N
NCAPH2	0.336181		0000		0		N		N
PITPNB	0.336055		0000		0		N		N
C20orf20	0.335678		0000		0		N		N
TTF2	0.335372		1111		1111		Y		N
HMGA1	0.334953		0000		0		N		N
PSMG1	0.334804		0000		0		N		N
SMC1B	0.33475		0000		0		N		N
MRPL13	0.334529		1111		1111		Y		N
MRPL13	0.334529		1111		1111		Y		N
MRPL13	0.334529		1111		1111		Y		N
BYSL	0.333913		0000		0		N		N
RCC2	0.333653		0000		0		N		N
MSH6	0.333527		0000		0		N		N
MSH6	0.333527		0000		0		N		N
MSH6	0.333527		0000		0		N		N
PDCL3	0.333255		0000		0		N		N
MSH2	0.333171		0000		0		N		N
MSH2	0.333171		0000		0		N		N
MSH2	0.333171		0000		0		N		N
IDI1	0.332804		0010		10		N		N
TIMM8A	0.332456		1011		1011		Y		N
UCK2	0.332385		0000		0		N		N
PDHA1	0.332307		0000		0		N		N
CCL7	0.331318		0000		0		N		N
HNRNPAB	0.331291		1011		1011		Y		N
JOSD1	0.330927		0000		0		N		N
IGF2BP3	0.33091		0000		0		N		N
TOMM40	0.330726		0010		10		N		N
BRCA2	0.330567		1111		1111		Y		N
PTDSS1	0.33043		0000		0		N		N
RAD21	0.330269		#N/A		#N/A		#N/A		N
GAS2L3	0.330237		1010		1010		N		N
NUDCD1	0.329992		#N/A		#N/A		#N/A		N
BID	0.329889		0000		0		N		N
KCMF1	0.329503		0000		0		N		N
UQCRHL	0.328277		0000		0		N		N
MRPL47	0.328221		0000		0		N		N
MRPL47	0.328221		0000		0		N		N
MRPL47	0.328221		0000		0		N		N
SKP2	0.327657		0000		0		N		N
SCLT1	0.327545		1111		1111		Y		N
ELOVL1	0.327351		0000		0		N		N
ATP1B3	0.327283		0000		0		N		N
PPP2R5D	0.326605		0000		0		N		N
C18orf54	0.325937		0000		0		N		N
NUP85	0.325882		1111		1111		Y		N
POLR2F	0.325599		#N/A		#N/A		#N/A		N
DEK	0.325565		0100		100		N		N
ELOVL1	0.325503		0000		0		N		N
MRPS5	0.325433		0000		0		N		N
MRPS5	0.325433		0000		0		N		N
MRPS5	0.325433		0000		0		N		N
CYCS	0.32531		1001		1001		N		N
SNRPC	0.325287		0000		0		N		N
C16orf87	0.325176		#N/A		#N/A		#N/A		N
HTATIP2	0.32512		0000		0		N		N
CHCHD3	0.324983		1011		1011		Y		N
UQCRH	0.324963		0000		0		N		N
CABLES2	0.32479		0000		0		N		N
SMC2	0.324505		1111		1111		Y		N
VGF	0.324336		0000		0		N		N
FAM49B	0.323654		#N/A		#N/A		#N/A		N
CDK16	0.32299		0000		0		N		N
C6orf115	0.322957		#N/A		#N/A		#N/A		N
ASNS	0.322883		0000		0		N		N
YWHAQ	0.322772		0000		0		N		N
CIRH1A	0.3225		0000		0		N		N
MTFR1	0.322425		0000		0		N		N
PSMC4	0.321752		0000		0		N		N
DERL1	0.321732		0000		0		N		N
RHEB	0.3216		0010		10		N		N
CDK2	0.321345		1111		1111		Y		N
ANP32E	0.320358		1111		1111		Y		N
CEP152	0.32028		1111		1111		Y		N
ADAMDEC1	0.320196		0000		0		N		N
P2RY6	0.319041		0000		0		N		N
STIP1	0.318832		0000		0		N		N
C6orf129	0.318793		#N/A		#N/A		#N/A		N
MRPL37	0.318624		0001		1		N		N
MRPL37	0.318624		0001		1		N		N
MRPL37	0.318624		0001		1		N		N
FOXRED2	0.318467		0000		0		N		N
TMEM65	0.31837		0000		0		N		N
KARS	0.318126		0000		0		N		N
LAPTM4B	0.318121		0000		0		N		N
RCCD1	0.317461		#N/A		#N/A		#N/A		N
IMPA2	0.316376		0000		0		N		N
NDUFB9	0.31619		0000		0		N		N
TOMM5	0.316026		0000		0		N		N
C16orf80	0.315967		1011		1011		Y		N
TAP1	0.315718		0000		0		N		N
CXCL10	0.315631		0000		0		N		N
SLBP	0.315417		1011		1011		Y		N
FBXO45	0.314832		0010		10		N		N
USP1	0.314559		1011		1011		Y		N
CIAPIN1	0.314474		0000		0		N		N
PIGW	0.314415		0011		11		N		N
C16orf57	0.313875		0000		0		N		N
ATF4	0.313774		1011		1011		Y		N
TXNRD1	0.313412		0000		0		N		N
CENPQ	0.313212		1111		1111		Y		N
RPP25	0.312456		0000		0		N		N
PSMC2	0.311983		0001		1		N		N
PRDX4	0.311971		0000		0		N		N
PDCD5	0.311931		0000		0		N		N
ALG3	0.311678		0000		0		N		N
ACO2	0.311304		0000		0		N		N
SKA2	0.310498		1111		1111		Y		N
CXCL11	0.310458		0000		0		N		N
TAP2	0.31042		0000		0		N		N
YWHAH	0.310396		0000		0		N		N
TCEB1	0.310253		0011		11		N		N
PES1	0.309739		0001		1		N		N
TAGLN2	0.309731		0000		0		N		N
BRIX1	0.309648		1111		1111		Y		N
CYC1	0.309558		0000		0		N		N
SFRS2	0.309544		#N/A		#N/A		#N/A		N
GPI	0.308451		0000		0		N		N
OTX1	0.308418		0000		0		N		N
SMARCB1	0.308305		0000		0		N		N
SF3B3	0.30823		0001		1		N		N
SRPK1	0.308047		0000		0		N		N
DCAF13	0.308044		0000		0		N		N
TMEM194A	0.307797		1111		1111		Y		N
ABCF1	0.307794		0000		0		N		N
AQP9	0.307645		0000		0		N		N
C1orf112	0.30749		#N/A		#N/A		#N/A		N
NUP50	0.307343		0010		10		N		N
FANCC	0.307267		0000		0		N		N
POLR2K	0.307261		1011		1011		Y		N
WDR4	0.307259		0000		0		N		N
BOLA3	0.307039		0000		0		N		N
RDM1	0.306797		1111		1111		Y		N
THOC5	0.30668		0011		11		N		N
RNASEH1	0.306533		0000		0		N		N
MTERFD1	0.306499		0000		0		N		N
TARS	0.306381		0000		0		N		N
CCDC90A	0.306187		0000		0		N		N
UBE2L3	0.306171		0000		0		N		N
PSMB5	0.306048		0010		10		N		N
PNPT1	0.305965		0000		0		N		N
HPRT1	0.305621		0000		0		N		N
HCCS	0.305604		1111		1111		Y		N
HIST1H2AH	0.305499		1111		1111		Y		N
CKLF	0.305358		#N/A		#N/A		#N/A		N
HIST1H1B	0.305171		0011		11		N		N
SNRPA	0.305023		1111		1111		Y		N
CCL18	0.304865		0000		0		N		N
COX5A	0.304729		0000		0		N		N
HDAC2	0.304465		0000		0		N		N
HIST1H2BJ	0.304048		1111		1111		Y		N
NOP58	0.30338		1111		1111		Y		N
C9orf40	0.30328		#N/A		#N/A		#N/A		N
VCP	0.303241		0000		0		N		N
MYO19	0.303043		0011		11		N		N
HIST1H2BO	0.302743		1011		1011		Y		N
SNX8	0.302736		0000		0		N		N
ENO1	0.302264		0000		0		N		N
TMEM206	0.302207		0000		0		N		N
CCDC77	0.302168		1111		1111		Y		N
PNO1	0.302102		1111		1111		Y		N
ACTR3	0.302074		0000		0		N		N
TALDO1	0.302068		0000		0		N		N
A2ML1	0.301157		0000		0		N		N
MCM8	0.300783		1111		1111		Y		N
HSPE1	0.300763		#N/A		#N/A		#N/A		N
FLVCR2	0.30059		0000		0		N		N
PDIA6	0.300587		0000		0		N		N
ATAD3A	0.300448		0000		0		N		N
MTCH2	0.300302		0000		0		N		N
MTCH2	0.300302		0000		0		N		N
MTCH2	0.300302		0000		0		N		N
NOP2	0.299608		0000		0		N		N
GAPDH	0.299438		1011		1011		Y		N
PAK1IP1	0.299076		0000		0		N		N
ENO1	0.298316		0000		0		N		N
C12orf32	0.297907		1011		1011		Y		N
SUMO2	0.297876		0000		0		N		N
UNG	0.297684		1011		1011		Y		N
MARCO	0.297645		0000		0		N		N
DDN	0.297256		0000		0		N		N
IDO1	0.297121		0000		0		N		N
RNF114	0.29707		0000		0		N		N
NUP205	0.296992		1011		1011		Y		N
LAG3	0.296669		0000		0		N		N
ARPC5L	0.296644		0000		0		N		N
FPR2	0.296626		0000		0		N		N
RELT	0.296544		0010		10		N		N
DCLRE1C	0.29648		1111		1111		Y		N
NSDHL	0.296222		0000		0		N		N
ZDHHC18	0.296012		0000		0		N		N
RBX1	0.295817		0110		110		N		N
ATAD5	0.295519		1111		1111		Y		N
CACYBP	0.295344		1011		1011		Y		N
NCL	0.295103		0000		0		N		N
NSUN2	0.294786		0000		0		N		N
RFC5	0.294516		1111		1111		Y		N
DNMT3A	0.294447		0000		0		N		N
ATG3	0.294405		0000		0		N		N
XPOT	0.294309		0000		0		N		N
ATP5G3	0.29426		0000		0		N		N
IL4I1	0.294207		0000		0		N		N
MORC2	0.29386		0000		0		N		N
CSTB	0.29316		0000		0		N		N
PLA2G7	0.293087		0000		0		N		N
EIF4EBP1	0.292638		0000		0		N		N
GPT2	0.292388		0000		0		N		N
TIPIN	0.292341		1011		1011		Y		N
ARL9	0.292147		0000		0		N		N
GPN1	0.29203		0000		0		N		N
AHSA1	0.291914		0000		0		N		N
LYAR	0.291865		0000		0		N		N
UBA2	0.291708		0000		0		N		N
CLCN5	0.291691		0000		0		N		N
NMU	0.291686		0000		0		N		N
KLHDC7B	0.291658		#N/A		#N/A		#N/A		N
FADS1	0.291441		0000		0		N		N
HPSE	0.291419		0000		0		N		N
TRIM47	0.291258		0000		0		N		N
C1orf106	0.291142		#N/A		#N/A		#N/A		N
HTATSF1	0.291094		0000		0		N		N
MMP1	0.29104		0000		0		N		N
MED30	0.29101		1011		1011		Y		N
RGS20	0.290985		0000		0		N		N
KCNK12	0.290826		0000		0		N		N
PSMC3IP	0.290801		1111		1111		Y		N
FAM127B	0.290768		#N/A		#N/A		#N/A		N
CFL1	0.290543		0001		1		N		N
EIF4EBP1	0.290353		0000		0		N		N
TPD52L2	0.290242		1011		1011		Y		N
FAIM	0.290185		0000		0		N		N
CLIC1	0.290157		#N/A		#N/A		#N/A		N
PSME4	0.289691		0000		0		N		N
DBNDD1	0.289494		0000		0		N		N
DNMT1	0.289215		0000		0		N		N
ELAVL1	0.289208		0000		0		N		N
HMGB3	0.288949		0000		0		N		N
KCTD5	0.288849		0000		0		N		N
SRPRB	0.28859		0000		0		N		N
RHBDF2	0.288557		0000		0		N		N
MXD3	0.288142		1111		1111		Y		N
SAC3D1	0.2881		0000		0		N		N
C14orf145	0.287779		#N/A		#N/A		#N/A		N
ANKRD54	0.287542		0000		0		N		N
ELAVL1	0.287456		0000		0		N		N
ACBD7	0.287272		0000		0		N		N
ADRM1	0.287141		0000		0		N		N
UBE2V2	0.286987		0000		0		N		N
CDKN2C	0.286944		0000		0		N		N
LAD1	0.286865		0000		0		N		N
BOP1	0.286661		0000		0		N		N
DHFR	0.2864		0000		0		N		N
HIST1H2BL	0.286392		1111		1111		Y		N
NARF	0.285205		0000		0		N		N
LBR	0.285008		0000		0		N		N
CASP3	0.284979		0000		0		N		N
ZDHHC13	0.2849		0000		0		N		N
PRDX1	0.284752		0000		0		N		N
TMSB10	0.284595		0000		0		N		N
MRPL12	0.284469		#N/A		#N/A		#N/A		N
MRPL12	0.284469		#N/A		#N/A		#N/A		N
MRPL12	0.284469		#N/A		#N/A		#N/A		N
CLN6	0.284159		0000		0		N		N
SSRP1	0.284139		0010		10		N		N
USP39	0.28389		0000		0		N		N
PSMB7	0.283352		0000		0		N		N
GPR56	0.282958		0000		0		N		N
IRAK1	0.282912		0000		0		N		N
DPM1	0.282886		0000		0		N		N
AMD1	0.28274		0000		0		N		N
IL2RA	0.282593		0000		0		N		N
EML4	0.282541		0000		0		N		N
PYCR1	0.282208		0000		0		N		N
CDK4	0.281861		0000		0		N		N
LHX2	0.281859		0000		0		N		N
OASL	0.281857		0000		0		N		N
HSF1	0.281435		0000		0		N		N
PRIM1	0.281412		0000		0		N		N
TCF20	0.281236		0000		0		N		N
TAF5	0.281232		0000		0		N		N
FBXO43	0.281126		0000		0		N		N
UQCR10	0.281092		0000		0		N		N
CAMK1G	0.281083		0000		0		N		N
PUF60	0.28104		0100		100		N		N
CHMP1A	0.280936		0000		0		N		N
C1orf163	0.280676		#N/A		#N/A		#N/A		N
MAGOH	0.280639		0001		1		N		N
E2F3	0.280604		1011		1011		Y		N
NT5DC2	0.280479		0000		0		N		N
PSMA5	0.2802		0000		0		N		N
ABCD1	0.280145		0000		0		N		N
EML4	0.280012		0000		0		N		N
C6orf167	0.279486		#N/A		#N/A		#N/A		N
GLT25D1	0.279104		0000		0		N		N
CKAP5	0.278822		1011		1011		Y		N
IFI30	0.278787		0000		0		N		N
NUP62	0.278674		0000		0		N		N
TIMM17A	0.278351		0000		0		N		N
SEC13	0.278348		0000		0		N		N
LAMP3	0.278341		0000		0		N		N
TCP1	0.278289		1011		1011		Y		N
TMEM171	0.278187		0000		0		N		N
CBFB	0.278175		0000		0		N		N
NUP37	0.278079		0000		0		N		N
CSNK2B	0.278009		0111		111		Y		N
ZBED4	0.277719		0000		0		N		N
HNRNPL	0.277641		1011		1011		Y		N
NPLOC4	0.277507		0000		0		N		N
FAM100B	0.277313		#N/A		#N/A		#N/A		N
SFN	0.277298		0000		0		N		N
PLP2	0.277281		0000		0		N		N
TMEM97	0.277238		1011		1011		Y		N
DDX27	0.277127		0000		0		N		N
MTHFD1	0.276901		1011		1011		Y		N
CHRAC1	0.276864		0000		0		N		N
TH1L	0.276796		0000		0		N		N
CCT8	0.276633		0000		0		N		N
FOXK2	0.27637		0000		0		N		N
HK3	0.275867		0000		0		N		N
RRP7A	0.275791		0011		11		N		N
TERT	0.275747		0000		0		N		N
SIGMAR1	0.275592		0000		0		N		N
MED8	0.275484		0000		0		N		N
MTHFD1L	0.275462		0000		0		N		N
PPIAL4C	0.275451		#N/A		#N/A		#N/A		N
SFPQ	0.275342		1011		1011		Y		N
RNFT2	0.274934		0000		0		N		N
CPSF3	0.274897		0001		1		N		N
MANF	0.274825		0000		0		N		N
PGD	0.274728		0000		0		N		N
GCH1	0.274674		0000		0		N		N
MFSD2B	0.27462		0000		0		N		N
IL12RB2	0.274554		0000		0		N		N
NSMCE2	0.274461		0000		0		N		N
KCNG3	0.274113		0000		0		N		N
ULBP1	0.274052		0111		111		Y		N
VBP1	0.273982		0000		0		N		N
UTP11L	0.273816		0000		0		N		N
MDC1	0.27379		1111		1111		Y		N
C7orf28A	0.27377		#N/A		#N/A		#N/A		N
RBM38	0.27372		0000		0		N		N
XK	0.273193		0000		0		N		N
MAGOHB	0.273022		0010		10		N		N
CECR5	0.272909		0000		0		N		N
SRD5A1	0.27279		0000		0		N		N
PSAT1	0.272728		0000		0		N		N
PPIA	0.272636		0000		0		N		N
CCDC134	0.272619		0000		0		N		N
SLC25A43	0.272226		0000		0		N		N
GPR158	0.272226		0000		0		N		N
C3orf37	0.27173		#N/A		#N/A		#N/A		N
NDUFA9	0.271582		0000		0		N		N
TMSB15A	0.271258		0000		0		N		N
SLC25A32	0.271088		#N/A		#N/A		#N/A		N
SLMO2	0.27065		0000		0		N		N
TMEM132A	0.270429		0000		0		N		N
RGS9BP	0.270422		0000		0		N		N
FAM131C	0.270238		#N/A		#N/A		#N/A		N
WDR77	0.270079		#N/A		#N/A		#N/A		N
PHGDH	0.270053		0000		0		N		N
TMEM180	0.269865		0000		0		N		N
SLC35B1	0.269707		0000		0		N		N
RPP40	0.269613		0000		0		N		N
ITPR3	0.269587		0000		0		N		N
C18orf10	0.269544		#N/A		#N/A		#N/A		N
GALNS	0.269476		0000		0		N		N
STK38	0.269265		0000		0		N		N
AP1B1	0.269215		0000		0		N		N
GLRX3	0.26904		0000		0		N		N
WDR53	0.268927		#N/A		#N/A		#N/A		N
RBM28	0.268832		0000		0		N		N
TBRG4	0.268701		0000		0		N		N
SLC26A9	0.268638		0000		0		N		N
MRPL11	0.268466		0100		100		N		N
MRPL11	0.268466		0100		100		N		N
MRPL11	0.268466		0100		100		N		N
MAPRE1	0.268457		0000		0		N		N
TMEM194B	0.268408		0000		0		N		N
GRK6	0.268331		0000		0		N		N
FIGNL1	0.268312		0010		10		N		N
SET	0.268245		0000		0		N		N
SHFM1	0.268182		1011		1011		Y		N
ELF4	0.26818		0000		0		N		N
IL29	0.268108		0000		0		N		N
PGAM5	0.268017		0000		0		N		N
TMEM201	0.267939		0000		0		N		N
PSMD1	0.267832		0000		0		N		N
TIMM50	0.267825		0000		0		N		N
JMJD6	0.26759		0000		0		N		N
SH2D2A	0.267518		0000		0		N		N
WDR12	0.267395		0000		0		N		N
R3HDM1	0.267269		0010		10		N		N
PSMC3	0.267052		1010		1010		N		N
PSMD8	0.26698		0000		0		N		N
XIRP1	0.266889		0000		0		N		N
SLC2A6	0.266741		0000		0		N		N
CALR	0.26664		1011		1011		Y		N
TKT	0.26649		0000		0		N		N
ELF4	0.266429		0000		0		N		N
PSMD11	0.266312		0000		0		N		N
BCL2A1	0.266267		0000		0		N		N
CCT7	0.265876		0001		1		N		N
PSMA6	0.265728		0000		0		N		N
COX7B	0.265535		0000		0		N		N
CCL8	0.265261		0000		0		N		N
HSP90AB1	0.265171		0000		0		N		N
NAE1	0.265167		0000		0		N		N
ME2	0.264651		0000		0		N		N
GAL	0.264507		0000		0		N		N
ESRP1	0.26441		0000		0		N		N
MVD	0.264112		0000		0		N		N
GZMB	0.264104		0000		0		N		N
EWSR1	0.264058		0000		0		N		N
POLD1	0.264016		1011		1011		Y		N
PA2G4	0.264015		0000		0		N		N
PANX2	0.264008		0000		0		N		N
MRPL14	0.263985		0000		0		N		N
MRPL14	0.263985		0000		0		N		N
MRPL14	0.263985		0000		0		N		N
ASCC2	0.263831		0000		0		N		N
DNAJA1	0.263304		0000		0		N		N
POLE3	0.263083		0011		11		N		N
DDT	0.263004		0000		0		N		N
PSMB4	0.262992		0000		0		N		N
CDK2AP1	0.26283		0000		0		N		N
ABTB2	0.262755		0000		0		N		N
PSMA3	0.262496		0000		0		N		N
RAP2B	0.262494		0011		11		N		N
STAT1	0.262284		1010		1010		N		N
PFN1	0.262177		0000		0		N		N
CMPK2	0.261882		0000		0		N		N
B3GNT4	0.261878		0000		0		N		N
SLC3A2	0.261802		1011		1011		Y		N
NOP56	0.26177		0000		0		N		N
RTN4R	0.261759		0000		0		N		N
GTF3C5	0.261692		0000		0		N		N
POP4	0.261614		0000		0		N		N
PPP1R14B	0.261591		0000		0		N		N
COQ9	0.261527		0000		0		N		N
GTPBP2	0.261409		0000		0		N		N
GNL2	0.261107		0000		0		N		N
TRMU	0.261091		0000		0		N		N
AGTPBP1	0.261074		0000		0		N		N
GOT1	0.261003		0100		100		N		N
SLC25A13	0.260434		0000		0		N		N
PAICS	0.260281		0000		0		N		N
PREB	0.260223		0000		0		N		N
NCS1	0.260191		0000		0		N		N
SLC4A5	0.259928		0000		0		N		N
HNRNPA2B1	0.259747		1111		1111		Y		N
EIF3B	0.259695		0000		0		N		N
SASS6	0.259678		1111		1111		Y		N
MURC	0.259308		0000		0		N		N
PLSCR1	0.259268		0000		0		N		N
NME1	0.259109		#N/A		#N/A		#N/A		N
TEAD4	0.258878		0000		0		N		N
MT1H	0.258852		#N/A		#N/A		#N/A		N
MT1H	0.258852		#N/A		#N/A		#N/A		N
MT1H	0.258852		#N/A		#N/A		#N/A		N
FAM96B	0.25863		0000		0		N		N
EIF3B	0.258539		0000		0		N		N
RPN2	0.258276		0010		10		N		N
GPR37	0.258275		0000		0		N		N
MRPS18A	0.258244		0011		11		N		N
MRPS18A	0.258244		0011		11		N		N
MRPS18A	0.258244		0011		11		N		N
ISG20	0.258216		0000		0		N		N
NANP	0.258143		0000		0		N		N
PFKP	0.258129		0000		0		N		N
DDX11	0.25812		1111		1111		Y		N
ZBED2	0.257983		0000		0		N		N
CCDC59	0.257948		0000		0		N		N
EIF2AK2	0.257911		0000		0		N		N
HES6	0.25785		0000		0		N		N
SBSN	0.257755		0000		0		N		N
MTCH1	0.2577		0000		0		N		N
MTCH1	0.2577		0000		0		N		N
MTCH1	0.2577		0000		0		N		N
UQCRFS1	0.257451		0000		0		N		N
EAF2	0.257333		0000		0		N		N
BTF3L4	0.257275		#N/A		#N/A		#N/A		N
FARSB	0.257158		0000		0		N		N
GDI2	0.257133		0000		0		N		N
MRPS17	0.257122		0000		0		N		N
MRPS17	0.257122		0000		0		N		N
MRPS17	0.257122		0000		0		N		N
WDR34	0.257114		0001		1		N		N
TMEM151A	0.256945		0000		0		N		N
SLAMF8	0.256902		0000		0		N		N
MRPS12	0.256593		0000		0		N		N
MRPS12	0.256593		0000		0		N		N
MRPS12	0.256593		0000		0		N		N
ENOPH1	0.256578		0000		0		N		N
CCT4	0.256537		0000		0		N		N
ETV7	0.256513		0000		0		N		N
SMC6	0.256473		1111		1111		Y		N
LIG1	0.256461		0010		10		N		N
ZC3H18	0.256453		0000		0		N		N
SFT2D2	0.256298		0000		0		N		N
PFDN2	0.256198		0000		0		N		N
HIST1H3J	0.256012		0011		11		N		N
RTKN	0.255987		0000		0		N		N
EIF2AK2	0.255967		0000		0		N		N
EXOSC9	0.255949		1011		1011		Y		N
REEP4	0.255946		1111		1111		Y		N
UBAP2	0.255791		#N/A		#N/A		#N/A		N
ENOPH1	0.255768		0000		0		N		N
MRPL36	0.255568		0000		0		N		N
MRPL36	0.255568		0000		0		N		N
MRPL36	0.255568		0000		0		N		N
PSMA2	0.25556		0010		10		N		N
CTSC	0.255362		0000		0		N		N
QSOX2	0.255328		0000		0		N		N
KLRG2	0.255253		0000		0		N		N
YEATS2	0.255181		0000		0		N		N
PFDN4	0.255008		0000		0		N		N
MRPL2	0.254972		0000		0		N		N
MRPL2	0.254972		0000		0		N		N
MRPL2	0.254972		0000		0		N		N
FOXN2	0.254468		1011		1011		Y		N
SLC4A1AP	0.254448		0000		0		N		N
GBP5	0.254368		0000		0		N		N
RALY	0.254141		0000		0		N		N
OR2B6	0.25406		0000		0		N		N
TOPBP1	0.253696		0000		0		N		N
NRD1	0.253669		1111		1111		Y		N
SLC36A4	0.253619		0000		0		N		N
PTBP1	0.2535		0000		0		N		N
ZNF706	0.253401		0000		0		N		N
C1QL4	0.253196		0000		0		N		N
CCDC137	0.252911		#N/A		#N/A		#N/A		N
RTCD1	0.252856		0000		0		N		N
C4orf21	0.252796		1111		1111		Y		N
U2AF1	0.252773		0000		0		N		N
INSIG1	0.252725		0000		0		N		N
PSME2	0.252371		0001		1		N		N
RSU1	0.252335		0000		0		N		N
MRPS7	0.25225		0000		0		N		N
MRPS7	0.25225		0000		0		N		N
MRPS7	0.25225		0000		0		N		N
ULBP2	0.251929		0000		0		N		N
RRP1B	0.251901		0000		0		N		N
DUS2L	0.251873		0000		0		N		N
SNRPF	0.251764		0000		0		N		N
CORO1C	0.251537		0000		0		N		N
TPM3	0.251257		0000		0		N		N
MTA2	0.251116		0000		0		N		N
MTA2	0.251116		0000		0		N		N
MTA2	0.251116		0000		0		N		N
CD38	0.25106		0000		0		N		N
ATP6V1C2	0.250984		0000		0		N		N
PDCD2L	0.250956		0000		0		N		N
ACRV1	0.250946		0001		1		N		N
GART	0.250827		0000		0		N		N
SMCR7L	0.250704		0000		0		N		N
LARP4B	0.250572		0000		0		N		N
BMS1	0.250568		0100		100		N		N
EIF4A3	0.250318		0000		0		N		N
HAUS7	0.250316		0000		0		N		N
HNRNPD	0.250233		0000		0		N		N
MRPL3	0.250149		0010		10		N		N
MRPL3	0.250149		0010		10		N		N
MRPL3	0.250149		0010		10		N		N
TMEM208	0.250133		0000		0		N		N
DHDH	0.249888		0000		0		N		N
WHSC1	0.249816		0000		0		N		N
C8orf30A	0.24981		#N/A		#N/A		#N/A		N
IDH2	0.249804		0000		0		N		N
NOL10	0.249695		0000		0		N		N
IFIH1	0.249655		0000		0		N		N
CRELD2	0.249637		0000		0		N		N
TRA2B	0.249606		0000		0		N		N
L3MBTL2	0.249349		0010		10		N		N
INTS8	0.249313		0000		0		N		N
PSIP1	0.249269		0000		0		N		N
GFRA3	0.249253		0000		0		N		N
SH3BGRL3	0.248968		0000		0		N		N
BAIAP2L2	0.248821		0000		0		N		N
MRPL48	0.248677		0000		0		N		N
MRPL48	0.248677		0000		0		N		N
MRPL48	0.248677		0000		0		N		N
ME1	0.248562		0000		0		N		N
AHCY	0.248545		0000		0		N		N
APOO	0.248538		0000		0		N		N
PPAT	0.248498		0000		0		N		N
PRPSAP1	0.248351		1111		1111		Y		N
SLC15A1	0.248248		0000		0		N		N
EIF4A3	0.248182		0000		0		N		N
NAGA	0.248135		0011		11		N		N
TET3	0.247915		0000		0		N		N
CEP78	0.247905		1011		1011		Y		N
DCK	0.247587		1011		1011		Y		N
SLC16A3	0.247525		0000		0		N		N
NIPSNAP1	0.247423		0000		0		N		N
KHSRP	0.247373		1011		1011		Y		N
DMBX1	0.247357		0000		0		N		N
KIF22	0.247317		1011		1011		Y		N
MRPS15	0.247276		0000		0		N		N
MRPS15	0.247276		0000		0		N		N
MRPS15	0.247276		0000		0		N		N
NDRG1	0.24724		0000		0		N		N
GNAS	0.247232		0000		0		N		N
KCNJ10	0.247168		0000		0		N		N
CARS	0.247015		0000		0		N		N
ICOS	0.246893		0000		0		N		N
CCDC21	0.246834		#N/A		#N/A		#N/A		N
RHOF	0.246785		0000		0		N		N
PATL1	0.246661		0000		0		N		N
DNTTIP1	0.246555		0000		0		N		N
ISL2	0.246525		0000		0		N		N
NUDT19	0.246376		0000		0		N		N
GBP1	0.246272		0000		0		N		N
RHBDL2	0.246223		0000		0		N		N
TMEM150B	0.246143		0000		0		N		N
SEC61G	0.246114		0000		0		N		N
C1orf96	0.246095		0000		0		N		N
ANKRD27	0.246046		0000		0		N		N
MICALL1	0.245524		0000		0		N		N
PDF	0.245472		0000		0		N		N
SLC25A17	0.245415		0000		0		N		N
LSM4	0.245355		0000		0		N		N
ISG15	0.245227		0000		0		N		N
TTC35	0.24513		0000		0		N		N
NOL11	0.245034		0001		1		N		N
SLC25A10	0.244948		0000		0		N		N
IL1F9	0.244934		#N/A		#N/A		#N/A		N
RPIA	0.244459		0000		0		N		N
MEMO1	0.244427		0000		0		N		N
SEC61A2	0.244329		0000		0		N		N
FAM83F	0.244319		#N/A		#N/A		#N/A		N
HERC5	0.244216		0000		0		N		N
THOC3	0.244186		0011		11		N		N
FADS2	0.244173		0010		10		N		N
SRC	0.244084		0000		0		N		N
SPTBN2	0.243749		0000		0		N		N
DPF1	0.24374		0000		0		N		N
PSPH	0.243669		0010		10		N		N
PPIAL4G	0.243463		0000		0		N		N
HM13	0.243443		0000		0		N		N
MTIF2	0.243252		0000		0		N		N
SAP30	0.243107		0011		11		N		N
C8orf55	0.243058		0011		11		N		N
NR2C2AP	0.242998		0001		1		N		N
FOXD1	0.242971		0000		0		N		N
UPP1	0.242962		0000		0		N		N
HNRNPA3	0.242727		1011		1011		Y		N
PLCH1	0.242169		0000		0		N		N
TEX19	0.241929		0000		0		N		N
S100A8	0.241888		0000		0		N		N
DSC2	0.241675		0000		0		N		N
SLC6A17	0.241665		0000		0		N		N
DAZAP1	0.241441		0000		0		N		N
STRA13	0.241129		0000		0		N		N
HMGN2	0.24111		0000		0		N		N
POLR2C	0.241071		0000		0		N		N
DPH2	0.24082		0000		0		N		N
VAC14	0.240816		0000		0		N		N
BARD1	0.240637		1111		1111		Y		N
XPNPEP3	0.240602		0000		0		N		N
TOMM34	0.240581		0000		0		N		N
EXOSC6	0.240511		1011		1011		Y		N
WDYHV1	0.240283		0001		1		N		N
C9orf30	0.240165		#N/A		#N/A		#N/A		N
IGF2BP1	0.240044		0000		0		N		N
UBE2O	0.239889		0000		0		N		N
CCT3	0.239885		0000		0		N		N
ZNRF1	0.23982		0000		0		N		N
TXNL4B	0.239601		0000		0		N		N
PPP1CA	0.239561		0000		0		N		N
CYB5B	0.23911		1011		1011		Y		N
LGMN	0.239018		0000		0		N		N
HIST1H2BK	0.238996		1111		1111		Y		N
PAPD7	0.238978		0000		0		N		N
P4HB	0.238911		0000		0		N		N
RCOR2	0.238701		0000		0		N		N
BRI3BP	0.238671		0000		0		N		N
TDG	0.238544		0000		0		N		N
ZC3H15	0.238446		0000		0		N		N
CCDC86	0.238354		0000		0		N		N
MMP9	0.238311		0000		0		N		N
PCBP1	0.238208		0000		0		N		N
DMRT1	0.238144		0000		0		N		N
C1orf198	0.238048		#N/A		#N/A		#N/A		N
PPP3R1	0.238012		0000		0		N		N
FPR3	0.237974		0000		0		N		N
C3orf26	0.237831		1111		1111		Y		N
COPG	0.237732		0000		0		N		N
VSIG10L	0.23772		0000		0		N		N
CDC42EP1	0.237666		0000		0		N		N
FAM58A	0.237474		0000		0		N		N
RUVBL1	0.237336		0000		0		N		N
APOBEC3F	0.237162		0000		0		N		N
XRCC6BP1	0.237159		0000		0		N		N
ONECUT2	0.237136		0000		0		N		N
NAA10	0.237003		0000		0		N		N
C15orf39	0.236956		#N/A		#N/A		#N/A		N
NOP10	0.236722		0000		0		N		N
GABBR2	0.23659		0000		0		N		N
EXOSC4	0.236536		0000		0		N		N
CCL13	0.236312		0000		0		N		N
IL20RB	0.236231		0000		0		N		N
PPPDE1	0.23616		#N/A		#N/A		#N/A		N
C19orf40	0.2361		1111		1111		Y		N
ARPC2	0.236025		0000		0		N		N
CSK	0.236015		0000		0		N		N
HIST1H2AM	0.235988		1011		1011		Y		N
CXCL9	0.235797		0000		0		N		N
SMC1A	0.235781		1011		1011		Y		N
BANF1	0.235654		0000		0		N		N
SLC43A3	0.235506		0000		0		N		N
TCOF1	0.235466		0000		0		N		N
PTRH2	0.235463		0000		0		N		N
FAM171A2	0.235398		0000		0		N		N
AP2M1	0.235398		0000		0		N		N
MAD2L2	0.235346		0000		0		N		N
SETD8	0.235083		1111		1111		Y		N
TRIM59	0.235046		0000		0		N		N
RAP2A	0.234768		0000		0		N		N
SNAI1	0.234766		0000		0		N		N
CCDC58	0.23463		0000		0		N		N
UBE2A	0.234563		0000		0		N		N
PRAME	0.234534		0000		0		N		N
HEATR3	0.234431		0000		0		N		N
OAS3	0.234335		1011		1011		Y		N
RPS19BP1	0.234266		0000		0		N		N
CISD2	0.234248		0101		101		N		N
HIRA	0.233983		0000		0		N		N
RAE1	0.233925		0000		0		N		N
AIMP2	0.233716		0000		0		N		N
CSNK2A2	0.233709		0000		0		N		N
SMS	0.233583		0000		0		N		N
SLC35E4	0.233524		0000		0		N		N
C8orf33	0.233438		#N/A		#N/A		#N/A		N
PVR	0.233436		0000		0		N		N
TRMT6	0.233183		1111		1111		Y		N
MMP12	0.233105		0000		0		N		N
CLEC6A	0.23306		0001		1		N		N
NUDT8	0.233005		0000		0		N		N
RPUSD3	0.232961		0000		0		N		N
CTLA4	0.232905		0000		0		N		N
NDUFAF4	0.232788		0000		0		N		N
PSMC1	0.23278		0000		0		N		N
ARPC5	0.232691		0000		0		N		N
GALR2	0.232669		0000		0		N		N
APEX2	0.232669		0000		0		N		N
SURF4	0.232603		0000		0		N		N
RIOK1	0.232481		0000		0		N		N
AIM2	0.232479		0000		0		N		N
HPDL	0.23236		0000		0		N		N
PARP2	0.23224		0000		0		N		N
PIGU	0.232234		0000		0		N		N
POLDIP3	0.232179		0000		0		N		N
PGAM1	0.232138		0000		0		N		N
FZD9	0.231779		0000		0		N		N
MTDH	0.231757		0000		0		N		N
MTDH	0.231757		0000		0		N		N
MTDH	0.231757		0000		0		N		N
EIF6	0.231734		0000		0		N		N
ATL2	0.231446		0000		0		N		N
PSMB9	0.231416		0000		0		N		N
CLPTM1L	0.23138		0000		0		N		N
CHORDC1	0.231341		0000		0		N		N
HIST1H2AL	0.231281		1111		1111		Y		N
AFG3L2	0.230997		0000		0		N		N
EPSTI1	0.230897		#N/A		#N/A		#N/A		N
CPNE2	0.230868		#N/A		#N/A		#N/A		N
EIF5AL1	0.230864		0000		0		N		N
PWP2	0.23073		0000		0		N		N
CXorf26	0.230718		0000		0		N		N
FBXL6	0.230699		0000		0		N		N
FAM98A	0.230242		#N/A		#N/A		#N/A		N
HR	0.230173		0000		0		N		N
ACOT9	0.230097		0000		0		N		N
YBX2	0.23009		0000		0		N		N
LMF2	0.230077		0000		0		N		N
YIF1B	0.230033		0000		0		N		N
CTSL1	0.229986		0000		0		N		N
NXPH4	0.229935		0000		0		N		N
C22orf28	0.229799		0000		0		N		N
PAQR4	0.229732		0000		0		N		N
POR	0.229653		0000		0		N		N
EIF5AL1	0.229453		0000		0		N		N
SCNM1	0.229417		0101		101		N		N
RBM15	0.22927		1111		1111		Y		N
LY6E	0.229248		0000		0		N		N
LCLAT1	0.229221		0000		0		N		N
PPARD	0.229202		0000		0		N		N
ELOVL7	0.229146		0000		0		N		N
PDE7A	0.2291		0000		0		N		N
MT1F	0.228945		0000		0		N		N
MT1F	0.228945		0000		0		N		N
MT1F	0.228945		0000		0		N		N
FAM192A	0.228852		1010		1010		N		N
GPR126	0.22884		0000		0		N		N
EIF6	0.228811		0000		0		N		N
PRELID1	0.228761		0000		0		N		N
LCT	0.228761		0000		0		N		N
NUP155	0.228564		1011		1011		Y		N
CCDC138	0.228441		#N/A		#N/A		#N/A		N
LPAR2	0.228437		0000		0		N		N
UBXN2A	0.228398		0000		0		N		N
RPP38	0.228322		0000		0		N		N
ELOVL7	0.228251		0000		0		N		N
MPHOSPH10	0.22824		0000		0		N		N
MPHOSPH10	0.22824		0000		0		N		N
MPHOSPH10	0.22824		0000		0		N		N
PSMA1	0.228239		1011		1011		Y		N
PI4K2B	0.228117		0000		0		N		N
MYH15	0.228079		0000		0		N		N
DDX19A	0.228046		#N/A		#N/A		#N/A		N
HIATL1	0.227986		0000		0		N		N
S100A11	0.227965		0000		0		N		N
TEX261	0.227706		0000		0		N		N
TUBB3	0.227694		0000		0		N		N
TATDN1	0.227621		0000		0		N		N
LYPD5	0.227572		0000		0		N		N
LILRA5	0.227544		0000		0		N		N
TMEM48	0.227535		1111		1111		Y		N
C1orf59	0.227496		#N/A		#N/A		#N/A		N
RPP21	0.227418		#N/A		#N/A		#N/A		N
PITPNC1	0.227381		0000		0		N		N
SLC6A9	0.227356		0000		0		N		N
YRDC	0.227137		0000		0		N		N
TTL	0.22705		0000		0		N		N
GTPBP8	0.22665		0000		0		N		N
TLCD1	0.226561		0000		0		N		N
XPO1	0.226501		1011		1011		Y		N
RASGEF1B	0.226459		0000		0		N		N
ATP5B	0.226399		0000		0		N		N
ITGA2B	0.226382		0000		0		N		N
RTN4IP1	0.226366		0000		0		N		N
SNRPB2	0.226269		0000		0		N		N
PSMD10	0.226267		0000		0		N		N
TMEM52	0.226241		0000		0		N		N
SCO2	0.226188		0000		0		N		N
UBL4A	0.22614		0000		0		N		N
SEL1L3	0.226099		0000		0		N		N
MX1	0.226095		0000		0		N		N
G6PD	0.225998		1000		1000		N		N
SPIN4	0.22575		0000		0		N		N
EIF4G1	0.225659		0000		0		N		N
TMEM165	0.225605		0000		0		N		N
DPYSL5	0.225533		0000		0		N		N
TRIM65	0.225358		0000		0		N		N
MLKL	0.225328		0000		0		N		N
TFDP1	0.225221		0000		0		N		N
C6orf136	0.225076		0000		0		N		N
POU5F1	0.22501		0000		0		N		N
CLTA	0.225003		0000		0		N		N
ACTL8	0.225001		0000		0		N		N
RHCG	0.224893		0000		0		N		N
NUDT15	0.22482		1111		1111		Y		N
YKT6	0.224804		0000		0		N		N
NUDT3	0.224769		#N/A		#N/A		#N/A		N
TNFSF13B	0.22476		0000		0		N		N
HLA-A	0.224729		0000		0		N		N
CCR1	0.224701		0000		0		N		N
BATF2	0.224673		0000		0		N		N
SOX11	0.224659		0000		0		N		N
C11orf84	0.224654		#N/A		#N/A		#N/A		N
DNAJC2	0.224604		0000		0		N		N
INA	0.224548		0000		0		N		N
MATN4	0.224376		0000		0		N		N
DAPK1	0.224355		0000		0		N		N
TUBB2C	0.224248		#N/A		#N/A		#N/A		N
SLC19A1	0.224157		0000		0		N		N
MRPS22	0.224122		0000		0		N		N
MRPS22	0.224122		0000		0		N		N
MRPS22	0.224122		0000		0		N		N
GUCA1A	0.223906		0000		0		N		N
CD80	0.223843		0000		0		N		N
CARHSP1	0.223833		0000		0		N		N
FAM123B	0.22382		0000		0		N		N
CDKAL1	0.223783		0010		10		N		N
TSPO	0.223704		#N/A		#N/A		#N/A		N
EIF4G1	0.223645		0000		0		N		N
NIPA2	0.223573		0000		0		N		N
KIR2DL4	0.223555		#N/A		#N/A		#N/A		N
SSB	0.223553		0000		0		N		N
NPM3	0.223543		0000		0		N		N
NHP2L1	0.223482		0001		1		N		N
CASP5	0.223399		0000		0		N		N
NETO2	0.223269		0000		0		N		N
TMEM51	0.22322		0000		0		N		N
LTA	0.223037		0000		0		N		N
FUCA2	0.222949		0000		0		N		N
STARD7	0.222938		0000		0		N		N
HSD17B10	0.222931		0000		0		N		N
ARL6IP1	0.222921		1111		1111		Y		N
C8orf59	0.222875		#N/A		#N/A		#N/A		N
FAM105B	0.222854		#N/A		#N/A		#N/A		N
KIN	0.222815		0000		0		N		N
AKIRIN2	0.222793		1111		1111		Y		Y
LSM6	0.222369		0000		0		N		N
NUP188	0.222359		0000		0		N		N
ZNF639	0.222294		0000		0		N		N
MRPS23	0.222236		0000		0		N		N
MRPS23	0.222236		0000		0		N		N
MRPS23	0.222236		0000		0		N		N
RPS6KB2	0.222231		0000		0		N		N
COX6B1	0.222191		0000		0		N		N
IL27	0.222186		0000		0		N		N
RQCD1	0.221904		1111		1111		Y		N
SLC35A2	0.221794		0000		0		N		N
TNIP3	0.221778		#N/A		#N/A		#N/A		N
EIF2B3	0.221576		0000		0		N		N
HIST1H2BE	0.22153		1011		1011		Y		N
KPNA4	0.221396		0000		0		N		N
ZMYND19	0.221358		0000		0		N		N
HIST1H3C	0.221351		1111		1111		Y		N
PDCD10	0.221319		0000		0		N		N
PFKL	0.221284		0000		0		N		N
TLE1	0.221199		0000		0		N		N
LSG1	0.221007		0000		0		N		N
ARNTL2	0.221007		0000		0		N		N
YDJC	0.220993		0000		0		N		N
STAMBP	0.220915		0000		0		N		N
EIF2B3	0.220747		0000		0		N		N
TMEM70	0.220729		0000		0		N		N
FOXP3	0.220702		0000		0		N		N
DUSP9	0.22066		0000		0		N		N
SNRPB	0.220554		1111		1111		Y		N
C1orf38	0.220536		0000		0		N		N
CCR8	0.220473		0000		0		N		N
CSTF3	0.220456		1011		1011		Y		N
DEM1	0.220453		0000		0		N		N
CTCFL	0.220397		0000		0		N		N
TAF2	0.219817		0000		0		N		N
LRRC8B	0.219805		0000		0		N		N
IFI44	0.21975		0000		0		N		N
WSB2	0.219651		0000		0		N		N
ZDHHC12	0.219644		0000		0		N		N
MRPL51	0.219595		1011		1011		Y		N
MRPL51	0.219595		1011		1011		Y		N
MRPL51	0.219595		1011		1011		Y		N
UPF2	0.219572		0000		0		N		N
TUBB4	0.219548		#N/A		#N/A		#N/A		N
MRPL18	0.219425		1011		1011		Y		N
MRPL18	0.219425		1011		1011		Y		N
MRPL18	0.219425		1011		1011		Y		N
MEX3A	0.219422		0000		0		N		N
RPL39L	0.219411		0010		10		N		N
S100A10	0.2194		0000		0		N		N
PSMB1	0.219368		0000		0		N		N
POP7	0.219319		1011		1011		Y		N
COTL1	0.219315		0000		0		N		N
SDF2L1	0.219242		0011		11		N		N
PFDN6	0.219208		0000		0		N		N
SEMA7A	0.219154		0000		0		N		N
GALNT3	0.219053		0000		0		N		N
EIF5A	0.218867		0000		0		N		N
NAA50	0.218833		0000		0		N		N
TNFRSF9	0.21881		0000		0		N		N
CIB2	0.218743		0000		0		N		N
TTLL4	0.218721		0000		0		N		N
PARP12	0.218696		0000		0		N		N
ODC1	0.218533		0000		0		N		N
CCT2	0.218463		0000		0		N		N
SLCO4A1	0.218431		0000		0		N		N
ATP1A3	0.218424		0000		0		N		N
TACO1	0.2184		0000		0		N		N
PDK1	0.218348		0000		0		N		N
TMEM104	0.218288		0000		0		N		N
PPP5C	0.218284		0001		1		N		N
C11orf86	0.218276		#N/A		#N/A		#N/A		N
MKRN3	0.21823		0010		10		N		N
HIST1H2AG	0.218125		1111		1111		Y		N
NRTN	0.218113		0000		0		N		N
BOLA2	0.218093		#N/A		#N/A		#N/A		N
ZYG11A	0.218093		0000		0		N		N
ASAP2	0.218045		0000		0		N		N
HRASLS	0.217988		0000		0		N		N
TMEM54	0.217881		0000		0		N		N
MEA1	0.217838		0000		0		N		N
PABPC1	0.217823		0000		0		N		N
SCN1A	0.217821		0000		0		N		N
RDBP	0.2178		0000		0		N		N
NOP16	0.217722		0000		0		N		N
GALK1	0.217704		0000		0		N		N
PUSL1	0.21761		0000		0		N		N
FOLH1	0.217475		0000		0		N		N
TSPAN33	0.217468		0000		0		N		N
CTU2	0.217459		0000		0		N		N
MAGEA6	0.21736		0000		0		N		N
OPRK1	0.217295		0000		0		N		N
LTV1	0.217173		#N/A		#N/A		#N/A		N
SRRD	0.217007		0000		0		N		N
EIF5A	0.216997		0000		0		N		N
ARF1	0.216918		0000		0		N		N
APOL6	0.216803		0000		0		N		N
CDH24	0.216766		0000		0		N		N
KDM2B	0.216755		0000		0		N		N
HLA-F	0.216733		0000		0		N		N
RAB35	0.216438		#N/A		#N/A		#N/A		N
MED27	0.216122		0000		0		N		N
HSP90B1	0.216106		1111		1111		Y		N
SLC25A1	0.216024		0000		0		N		N
CCHCR1	0.215988		1011		1011		Y		N
IMMT	0.215914		1011		1011		Y		N
XRCC3	0.215866		0000		0		N		N
RASAL1	0.215807		0000		0		N		N
ARMC6	0.215568		0000		0		N		N
LRRCC1	0.215532		0000		0		N		N
RAET1L	0.215372		0000		0		N		N
HRK	0.215087		0000		0		N		N
NUP107	0.215077		1111		1111		Y		N
NDRG4	0.215054		0000		0		N		N
C19orf57	0.215021		0000		0		N		N
AUP1	0.214995		0000		0		N		N
ACOT13	0.214902		0000		0		N		N
MAGEA3	0.214776		#N/A		#N/A		#N/A		N
CTSA	0.214576		#N/A		#N/A		#N/A		N
LIN37	0.214573		0000		0		N		N
METTL4	0.214568		1111		1111		Y		N
SLC1A5	0.214554		0000		0		N		N
DDOST	0.214537		0000		0		N		N
E2F5	0.214225		0000		0		N		N
CLEC7A	0.214209		0000		0		N		N
ATP5J2	0.214157		#N/A		#N/A		#N/A		N
NLRC5	0.213997		0000		0		N		N
NUS1	0.213837		0000		0		N		N
ENHO	0.213673		0000		0		N		N
C20orf11	0.213534		0010		10		N		N
FKBPL	0.213516		0010		10		N		N
MAF1	0.21343		0000		0		N		N
VARS	0.213352		0000		0		N		N
UCHL5	0.213241		0000		0		N		N
GEMIN6	0.213135		0000		0		N		N
CCL20	0.21304		0000		0		N		N
SEC61A1	0.212937		0000		0		N		N
SREBF2	0.212892		0000		0		N		N
LAS1L	0.212854		0000		0		N		N
TTC13	0.212804		0000		0		N		N
FTSJ2	0.212524		1111		1111		Y		N
LYN	0.212507		0000		0		N		N
NOLC1	0.212488		0011		11		N		N
PMM1	0.212479		0000		0		N		N
CKM	0.212405		0000		0		N		N
DDX19B	0.212257		0000		0		N		N
MYD88	0.212132		0000		0		N		N
RRS1	0.212015		0000		0		N		N
PSMG3	0.211993		#N/A		#N/A		#N/A		N
SLC7A1	0.211965		0000		0		N		N
TIFAB	0.211962		#N/A		#N/A		#N/A		N
FLAD1	0.211938		1011		1011		Y		N
MRPL39	0.211818		0001		1		N		N
MRPL39	0.211818		0001		1		N		N
MRPL39	0.211818		0001		1		N		N
FSD1	0.211773		0000		0		N		N
LYZ	0.211693		0000		0		N		N
KIAA1949	0.211498		#N/A		#N/A		#N/A		N
CLPB	0.211442		0000		0		N		N
TBCE	0.211316		0000		0		N		N
ENHO	0.211312		0000		0		N		N
NONO	0.211208		0000		0		N		N
HERC6	0.211164		0000		0		N		N
SMARCA4	0.211085		0000		0		N		N
RRM1	0.211073		1111		1111		Y		N
PLIN2	0.21098		0000		0		N		N
PRKX	0.210905		0000		0		N		N
E2F4	0.210896		0000		0		N		N
HRSP12	0.210696		0000		0		N		N
RASSF4	0.21069		0000		0		N		N
SLC25A33	0.210473		0000		0		N		N
C13orf37	0.210077		#N/A		#N/A		#N/A		N
CDK5R2	0.210072		0000		0		N		N
SECTM1	0.21005		0000		0		N		N
ORAI1	0.209837		0000		0		N		N
DMC1	0.209593		0000		0		N		N
KIAA0020	0.209591		0000		0		N		N
PPARGC1B	0.209582		0000		0		N		N
CHCHD2	0.209387		1011		1011		Y		N
TUBG1	0.20928		0000		0		N		N
WDR5	0.209274		0000		0		N		N
ERP44	0.209098		0000		0		N		N
CAD	0.209028		0000		0		N		N
TOMM6	0.20901		0000		0		N		N
SEH1L	0.208969		0000		0		N		N
SLCO5A1	0.208964		0000		0		N		N
UQCRB	0.208716		0000		0		N		N
WDR45L	0.208643		0000		0		N		N
NOC2L	0.208641		0000		0		N		N
DDX28	0.208618		0000		0		N		N
VDAC3	0.208571		0000		0		N		N
YTHDF1	0.208435		#N/A		#N/A		#N/A		N
MYLK2	0.208351		0000		0		N		N
PCYT2	0.208335		0000		0		N		N
APLP1	0.208269		0000		0		N		N
B3GNT7	0.208238		0000		0		N		N
ARRB2	0.208207		0000		0		N		N
SUMO3	0.20803		0000		0		N		N
KIAA1841	0.207954		#N/A		#N/A		#N/A		N
IFI27	0.207892		0000		0		N		N
SFRS7	0.207796		#N/A		#N/A		#N/A		N
SLC35C1	0.20778		0000		0		N		N
DRAM1	0.207722		0000		0		N		N
PDIA4	0.207638		0011		11		N		N
ADA	0.207579		0000		0		N		N
HRH3	0.207535		0000		0		N		N
POLE	0.207519		0000		0		N		N
TFG	0.207503		0000		0		N		N
SLC2A1	0.207457		0000		0		N		N
CHIC2	0.207452		0000		0		N		N
F5	0.207362		0000		0		N		N
NMI	0.207335		0000		0		N		N
SLC7A11	0.207322		0000		0		N		N
NEURL1B	0.207262		0000		0		N		N
SEC61B	0.207199		0000		0		N		N
PTPN2	0.207103		0000		0		N		N
VPS4A	0.207045		0000		0		N		N
FAM91A1	0.207043		#N/A		#N/A		#N/A		N
NKRF	0.206922		0000		0		N		N
PRMT1	0.20689		0000		0		N		N
IL32	0.206842		0000		0		N		N
MPHOSPH6	0.206599		0000		0		N		N
MPHOSPH6	0.206599		0000		0		N		N
MPHOSPH6	0.206599		0000		0		N		N
UPF3B	0.206427		0000		0		N		N
POLR1C	0.206381		0000		0		N		N
OSTF1	0.206371		0000		0		N		N
RAB42	0.206332		0000		0		N		N
UBASH3B	0.206316		0000		0		N		N
HIST1H4C	0.206056		1011		1011		Y		N
BRD7	0.205936		0000		0		N		N
CEP250	0.205923		0000		0		N		N
SFRS3	0.205845		#N/A		#N/A		#N/A		N
ABCB6	0.205831		0000		0		N		N
JMJD4	0.205676		#N/A		#N/A		#N/A		N
CENPJ	0.205518		0011		11		N		N
TBC1D1	0.205493		0000		0		N		N
C12orf11	0.205464		#N/A		#N/A		#N/A		N
CAMK2N2	0.205374		0000		0		N		N
BTG3	0.205373		0000		0		N		N
ACP1	0.205293		0000		0		N		N
TFRC	0.205233		0000		0		N		N
ART3	0.205225		0000		0		N		N
C21orf58	0.205165		#N/A		#N/A		#N/A		N
NFE2L3	0.205032		0000		0		N		N
USP5	0.205024		1011		1011		Y		N
PNPLA1	0.205023		0000		0		N		N
CAMKV	0.205011		0000		0		N		N
EBNA1BP2	0.205005		0000		0		N		N
EXT1	0.204935		0000		0		N		N
TIGIT	0.204926		0000		0		N		N
NOL7	0.204709		0000		0		N		N
AK2	0.204689		0010		10		N		N
RRP1	0.204662		0000		0		N		N
MAD2L1BP	0.204638		0000		0		N		N
COPS5	0.204562		0000		0		N		N
KCNJ4	0.20451		0000		0		N		N
PRSS3	0.204462		0000		0		N		N
AZIN1	0.204356		0000		0		N		N
ACTR2	0.204287		0001		1		N		N
CMAS	0.20422		0000		0		N		N
TARDBP	0.204171		0000		0		N		N
HIST1H2AJ	0.204136		1111		1111		Y		N
CALCB	0.204121		0000		0		N		N
C1orf131	0.204022		#N/A		#N/A		#N/A		N
HTRA4	0.203981		0000		0		N		N
KIAA0922	0.20398		0000		0		N		N
PFN2	0.203939		0000		0		N		N
PGLYRP4	0.203885		0000		0		N		N
OTP	0.20385		0000		0		N		N
SMAGP	0.203829		0000		0		N		N
UGP2	0.203779		0000		0		N		N
RSAD2	0.203759		0000		0		N		N
MX2	0.203587		0000		0		N		N
ZBTB32	0.203574		0000		0		N		N
LCTL	0.203517		0000		0		N		N
FAM127C	0.203514		#N/A		#N/A		#N/A		N
TTYH3	0.2035		0000		0		N		N
SH3GL3	0.2035		0000		0		N		N
TAF4	0.20348		0000		0		N		N
IL1F5	0.203412		#N/A		#N/A		#N/A		N
USP10	0.203381		0000		0		N		N
RHBDD3	0.203374		0000		0		N		N
HAPLN3	0.203341		0000		0		N		N
GPC2	0.203192		0000		0		N		N
PTGES2	0.203191		0000		0		N		N
DPY30	0.203162		0000		0		N		N
OTUD6B	0.203161		#N/A		#N/A		#N/A		N
LAGE3	0.203128		0000		0		N		N
C20orf27	0.203088		#N/A		#N/A		#N/A		N
HLA-B	0.203076		#N/A		#N/A		#N/A		N
DDX49	0.203049		0000		0		N		N
FMR1	0.202937		#N/A		#N/A		#N/A		N
SOCS1	0.202856		0000		0		N		N
EPRS	0.20274		0000		0		N		N
NHSL1	0.202729		#N/A		#N/A		#N/A		N
BRCA1	0.202696		1111		1111		Y		N
TTC7A	0.202388		0000		0		N		N
FABP5	0.202338		0000		0		N		N
CLEC4D	0.202088		0000		0		N		N
LILRA6	0.202069		#N/A		#N/A		#N/A		N
SPATA12	0.202057		#N/A		#N/A		#N/A		N
GJB3	0.201992		0000		0		N		N
CSTA	0.201927		0000		0		N		N
PANK1	0.201907		0000		0		N		N
GNG4	0.201597		0000		0		N		N
C6orf182	0.201532		#N/A		#N/A		#N/A		N
GAN	0.201412		0000		0		N		N
KIAA0406	0.201371		#N/A		#N/A		#N/A		N
TYMP	0.201308		0000		0		N		N
C19orf28	0.201245		#N/A		#N/A		#N/A		N
POLR3G	0.201111		0000		0		N		N
HIST1H3F	0.201048		1111		1111		Y		N
UTP18	0.201		0000		0		N		N
IFI6	0.200974		0000		0		N		N
C11orf75	0.200944		0000		0		N		N
MRPL38	0.200938		0000		0		N		N
MRPL38	0.200938		0000		0		N		N
MRPL38	0.200938		0000		0		N		N
HYLS1	0.200882		0000		0		N		N
GPS1	0.200872		0000		0		N		N
VPS35	0.200851		1111		1111		Y		N
PREP	0.200769		0000		0		N		N
RAB1A	0.200705		0000		0		N		N
NCF2	0.200673		0000		0		N		N
PDXK	0.200663		0000		0		N		N
C19orf48	0.200633		#N/A		#N/A		#N/A		N
METTL11A	0.200404		0000		0		N		N
CTRL	0.200401		0000		0		N		N
LACTB2	0.200368		0000		0		N		N
UMODL1	0.20034		0000		0		N		N
FAM119A	0.200251		#N/A		#N/A		#N/A		N
GTF3C6	0.200085		0000		0		N		N
RENBP	0.200073		0000		0		N		N
EIF1AD	0.200044		0000		0		N		N
POLD2	0.199884		0000		0		N		N
KIF21A	0.199879		0000		0		N		N
ZNF124	0.199799		0000		0		N		N
KHK	0.19976		0000		0		N		N
B3GNT3	0.199753		0000		0		N		N
PABPC3	0.199714		0000		0		N		N
CHFR	0.199699		0000		0		N		N
MYL12A	0.199661		0000		0		N		N
EIF1AD	0.19957		0000		0		N		N
KCNK9	0.19925		0000		0		N		N
ZBTB8OS	0.199182		#N/A		#N/A		#N/A		N
RABIF	0.199164		0000		0		N		N
CCL5	0.199138		0000		0		N		N
KDELR3	0.199131		0000		0		N		N
CEBPB	0.199087		0000		0		N		N
IFIT3	0.199068		0000		0		N		N
CISD1	0.198992		0011		11		N		N
KLHDC3	0.198989		0000		0		N		N
YWHAG	0.198923		0000		0		N		N
C9orf25	0.198777		#N/A		#N/A		#N/A		N
CASP2	0.198758		0000		0		N		N
ZNF259	0.198532		0000		0		N		N
CPSF4L	0.198505		0000		0		N		N
HAUS6	0.198452		1111		1111		Y		N
MRTO4	0.198416		0011		11		N		N
MRTO4	0.198416		0011		11		N		N
MRTO4	0.198416		0011		11		N		N
TNFRSF13C	0.198389		0000		0		N		N
SLC2A5	0.198363		0000		0		N		N
FUT3	0.198302		0000		0		N		N
IMPDH1	0.198284		0000		0		N		N
C6orf106	0.198265		0000		0		N		N
CBX3	0.198082		1011		1011		Y		N
MVK	0.198079		0000		0		N		N
LDOC1	0.19791		0000		0		N		N
IFNG	0.197844		0000		0		N		N
B4GALT5	0.197792		0000		0		N		N
VANGL1	0.197771		0000		0		N		N
NOL12	0.197711		0000		0		N		N
SF3A3	0.197673		0000		0		N		N
LPIN1	0.197634		0000		0		N		N
ICT1	0.197544		0000		0		N		N
RDH10	0.197504		0000		0		N		N
SLURP1	0.197296		0000		0		N		N
C11orf80	0.197252		#N/A		#N/A		#N/A		N
PRKDC	0.197239		1111		1111		Y		N
PLOD3	0.19716		0000		0		N		N
CKB	0.197033		0000		0		N		N
TTLL12	0.19684		0000		0		N		N
XPNPEP1	0.196836		0000		0		N		N
TRNAU1AP	0.196805		0000		0		N		N
MCAT	0.196798		0000		0		N		N
KRT83	0.196724		0000		0		N		N
FBXO7	0.196683		0000		0		N		N
BLOC1S3	0.196669		1011		1011		Y		N
HSP90AA1	0.196639		0000		0		N		N
GSTA2	0.196594		0000		0		N		N
FKBP1A	0.196547		0000		0		N		N
ALAS1	0.196546		0000		0		N		N
GPR180	0.196544		0000		0		N		N
POLD3	0.196483		0010		10		N		N
NDUFA12	0.196427		0000		0		N		N
MRS2	0.196336		0000		0		N		N
MRS2	0.196336		0000		0		N		N
MRS2	0.196336		0000		0		N		N
IWS1	0.196246		0000		0		N		N
GLRX2	0.196246		0000		0		N		N
C7orf52	0.196239		#N/A		#N/A		#N/A		N
SFRS1	0.196219		#N/A		#N/A		#N/A		N
SERBP1	0.19611		0001		1		N		N
TLX1	0.196103		0000		0		N		N
IBSP	0.195905		0000		0		N		N
NFKBIE	0.195898		0000		0		N		N
MAST1	0.195788		0000		0		N		N
MAGEA4	0.195781		0000		0		N		N
CDH3	0.195719		0000		0		N		N
WDR43	0.195686		0000		0		N		N
BCL2L12	0.195648		0010		10		N		N
GTPBP1	0.195645		0000		0		N		N
LSS	0.195588		0000		0		N		N
PSMD3	0.195587		0000		0		N		N
DCPS	0.195514		0010		10		N		N
ANKLE1	0.195507		0000		0		N		N
PARD3	0.195447		0000		0		N		N
SENP5	0.195393		0000		0		N		N
NKIRAS2	0.195383		0000		0		N		N
C1orf31	0.195364		0000		0		N		N
LSM14B	0.19528		0000		0		N		N
AADAT	0.195264		0000		0		N		N
SMNDC1	0.195157		0000		0		N		N
PSMB8	0.195079		0001		1		N		N
MPST	0.195027		0000		0		N		N
MPST	0.195027		0000		0		N		N
MPST	0.195027		0000		0		N		N
HMGCS1	0.194932		0000		0		N		N
TOP1MT	0.19492		0000		0		N		N
GOLT1B	0.194878		1111		1111		Y		N
TIMM44	0.194869		0000		0		N		N
TBC1D22B	0.194779		0000		0		N		N
PKP1	0.194768		0000		0		N		N
LILRB2	0.19461		0000		0		N		N
PPFIA3	0.194603		0000		0		N		N
IDH3A	0.194584		0000		0		N		N
FAF1	0.194529		0000		0		N		N
PDAP1	0.194526		0000		0		N		N
HAUS5	0.19451		1011		1011		Y		N
NXT1	0.19435		0010		10		N		N
PCK2	0.194344		0000		0		N		N
OGFOD1	0.194191		0000		0		N		N
GMPR	0.194177		0000		0		N		N
SDHB	0.194173		0000		0		N		N
EXOSC2	0.194137		0000		0		N		N
STAM	0.194087		0000		0		N		N
LIMD2	0.194044		0000		0		N		N
CSAG1	0.19386		#N/A		#N/A		#N/A		N
NT5C2	0.193771		0000		0		N		N
KREMEN2	0.193726		0000		0		N		N
TIMM10	0.193677		0010		10		N		N
URB2	0.193667		0000		0		N		N
TGIF2	0.193604		0000		0		N		N
MRPS10	0.193504		0000		0		N		N
MRPS10	0.193504		0000		0		N		N
MRPS10	0.193504		0000		0		N		N
GCAT	0.193389		0000		0		N		N
LRFN4	0.193245		0000		0		N		N
IGF2BP2	0.193185		0000		0		N		N
UMPS	0.193116		0000		0		N		N
IL10	0.193096		0000		0		N		N
VCAM1	0.193067		0000		0		N		N
RNF19B	0.192975		0000		0		N		N
CLDN23	0.192961		0000		0		N		N
WRNIP1	0.192893		0000		0		N		N
TGFA	0.192813		0000		0		N		N
ERO1L	0.192748		0000		0		N		N
HMBS	0.192659		1010		1010		N		N
ARL5B	0.192579		0000		0		N		N
ZIC5	0.19233		0000		0		N		N
DIAPH1	0.19233		0000		0		N		N
ATP5E	0.192254		0000		0		N		N
TEX10	0.192241		0000		0		N		N
TM7SF4	0.192166		0000		0		N		N
FAM83B	0.192162		#N/A		#N/A		#N/A		N
GTF3C2	0.192054		1011		1011		Y		N
STOML2	0.192051		0010		10		N		N
DHX38	0.192044		0000		0		N		N
PPIF	0.192025		0000		0		N		N
STRA8	0.191979		0000		0		N		N
MBD2	0.191974		0000		0		N		N
ARL6IP6	0.191942		0000		0		N		N
DLGAP3	0.1919		0000		0		N		N
ZNF165	0.191876		0000		0		N		N
ECEL1	0.191856		0000		0		N		N
DHODH	0.19183		0000		0		N		N
PGBD5	0.191818		0000		0		N		N
DDC	0.191782		0000		0		N		N
ZNF74	0.191773		0000		0		N		N
ACOT11	0.191756		0000		0		N		N
APRT	0.191614		0000		0		N		N
BCAP31	0.191589		0000		0		N		N
ACTB	0.191585		0000		0		N		N
VAPB	0.191385		0000		0		N		N
MTSS1L	0.191378		0000		0		N		N
CNOT1	0.191361		0010		10		N		N
RTP4	0.191347		0000		0		N		N
RBM14	0.191287		1011		1011		Y		N
EIF3C	0.191265		0011		11		N		N
CD7	0.191246		0000		0		N		N
BCR	0.191241		0000		0		N		N
FGD1	0.191045		0000		0		N		N
LAP3	0.190988		0011		11		N		N
RASGEF1C	0.190929		0000		0		N		N
TMCC2	0.190893		0000		0		N		N
PRKAG3	0.190769		0000		0		N		N
NF2	0.190707		0000		0		N		N
EIF3C	0.190536		0011		11		N		N
CSPG5	0.19051		0000		0		N		N
SLC44A2	0.190396		0000		0		N		N
ARMC1	0.190156		0011		11		N		N
MRPS24	0.190153		0000		0		N		N
MRPS24	0.190153		0000		0		N		N
MRPS24	0.190153		0000		0		N		N
CAPZA1	0.190113		0001		1		N		N
SLC26A6	0.190097		#N/A		#N/A		#N/A		N
USP6NL	0.190082		0000		0		N		N
C10orf119	0.18998		#N/A		#N/A		#N/A		N
EDEM2	0.189919		0000		0		N		N
MAP7D2	0.189742		#N/A		#N/A		#N/A		N
ISY1	0.189688		#N/A		#N/A		#N/A		N
DUS1L	0.189634		0000		0		N		N
DPP3	0.189616		0000		0		N		N
MTPAP	0.189582		0000		0		N		N
KDELR2	0.189559		0000		0		N		N
FOXP4	0.189459		0000		0		N		N
TMSB15B	0.189434		0000		0		N		N
PTS	0.189428		0000		0		N		N
CLEC4E	0.189411		0000		0		N		N
C6orf223	0.189398		#N/A		#N/A		#N/A		N
SRM	0.189394		0000		0		N		N
SLC16A13	0.189307		0000		0		N		N
LDHB	0.189269		0000		0		N		N
NHLH1	0.189186		0000		0		N		N
GPR37L1	0.189166		0000		0		N		N
GGCT	0.189142		1011		1011		Y		N
NCAPD3	0.189134		1111		1111		Y		N
EDEM2	0.188901		0000		0		N		N
AIFM1	0.188756		1011		1011		Y		N
C17orf96	0.188691		#N/A		#N/A		#N/A		N
POU4F1	0.18867		0000		0		N		N
ZBP1	0.188394		0000		0		N		N
KCNG1	0.188354		0000		0		N		N
SAMM50	0.188316		0000		0		N		N
HEBP2	0.18825		0000		0		N		N
ATP5H	0.188185		0000		0		N		N
MDH2	0.188176		0000		0		N		N
HIST1H2BN	0.188098		1111		1111		Y		N
RRBP1	0.188039		0010		10		N		N
KRT3	0.187996		0000		0		N		N
FAM81A	0.187945		#N/A		#N/A		#N/A		N
CCDC117	0.187786		#N/A		#N/A		#N/A		N
GYG1	0.187785		0000		0		N		N
ABP1	0.187729		0000		0		N		N
KIF24	0.187682		1111		1111		Y		N
SRCRB4D	0.187679		0000		0		N		N
ITGB7	0.187653		0000		0		N		N
KTI12	0.187611		0000		0		N		N
RBM8A	0.187587		0111		111		Y		N
SPDYC	0.187395		0000		0		N		N
ARPC4	0.187373		#N/A		#N/A		#N/A		N
COQ3	0.187354		0000		0		N		N
C3orf58	0.187349		0000		0		N		N
FOSL1	0.18725		0000		0		N		N
TBCC	0.187194		0000		0		N		N
PUS7	0.187117		0000		0		N		N
C19orf59	0.187105		0000		0		N		N
HIST2H3C	0.186991		1111		1111		Y		N
SYCE2	0.186929		0000		0		N		N
FTSJ3	0.186907		0000		0		N		N
C21orf70	0.186843		#N/A		#N/A		#N/A		N
NKX1-2	0.186843		0000		0		N		N
THAP11	0.186793		0000		0		N		N
OAS1	0.186767		0000		0		N		N
SLC38A3	0.186651		0000		0		N		N
LILRB3	0.186651		0000		0		N		N
PHF20L1	0.186565		0000		0		N		N
YIF1A	0.186445		0000		0		N		N
DBI	0.186328		0000		0		N		N
SMYD2	0.186307		0000		0		N		N
MRPS11	0.186298		1011		1011		Y		N
MRPS11	0.186298		1011		1011		Y		N
MRPS11	0.186298		1011		1011		Y		N
GJB6	0.186232		0000		0		N		N
CHMP4C	0.186225		0000		0		N		N
SRP68	0.186058		0000		0		N		N
USP13	0.186004		0000		0		N		N
ACTN4	0.185963		0010		10		N		N
PDIA5	0.185912		0000		0		N		N
TRIM16	0.185864		#N/A		#N/A		#N/A		N
SAMD1	0.185832		0000		0		N		N
APOC1	0.185804		0000		0		N		N
TREM1	0.185799		0000		0		N		N
FAM60A	0.185647		#N/A		#N/A		#N/A		N
S100A9	0.185595		0000		0		N		N
DGCR14	0.185546		0000		0		N		N
GABRA3	0.185534		0000		0		N		N
ACAD9	0.18551		0000		0		N		N
PSMB3	0.185458		1011		1011		Y		N
MSL3	0.185417		0000		0		N		N
MSL3	0.185417		0000		0		N		N
MSL3	0.185417		0000		0		N		N
PODXL2	0.185269		0000		0		N		N
PIM1	0.185266		0000		0		N		N
CHST11	0.185227		0000		0		N		N
COX4I1	0.185215		0000		0		N		N
GPR84	0.185115		0000		0		N		N
SMG5	0.184942		0010		10		N		N
SLAMF7	0.184831		0000		0		N		N
CHD7	0.184761		0000		0		N		N
RAD23A	0.18475		0000		0		N		N
PLBD1	0.184746		0000		0		N		N
DLGAP4	0.184712		0000		0		N		N
HSPA5	0.184658		0000		0		N		N
ABCB9	0.184648		0000		0		N		N
SLC7A7	0.184641		0000		0		N		N
PCYT1A	0.184599		0000		0		N		N
RAB7A	0.184594		0000		0		N		N
GNLY	0.184563		0000		0		N		N
KATNA1	0.184519		0010		10		N		N
FCN3	0.184502		0000		0		N		N
WNT10B	0.184459		0000		0		N		N
B4GALNT1	0.184294		0000		0		N		N
KRT78	0.184263		0000		0		N		N
STK3	0.184101		0000		0		N		N
CD72	0.184037		0000		0		N		N
FAM57A	0.184031		0000		0		N		N
TTC9C	0.184013		#N/A		#N/A		#N/A		N
SLC5A6	0.183936		#N/A		#N/A		#N/A		N
KLF11	0.183926		0000		0		N		N
TIPRL	0.183897		0000		0		N		N
GAR1	0.183897		0000		0		N		N
MICAL3	0.183896		0000		0		N		N
PLAUR	0.183895		0000		0		N		N
MUC16	0.183881		0000		0		N		N
CUL2	0.183803		0000		0		N		N
DNAJC5B	0.183767		0000		0		N		N
SLC28A1	0.18375		0000		0		N		N
COG4	0.183747		0001		1		N		N
PLCXD1	0.183724		0000		0		N		N
DDX18	0.183658		0000		0		N		N
IL2RG	0.183413		0000		0		N		N
ATP2A1	0.183384		0000		0		N		N
RGS19	0.183195		0000		0		N		N
KIF1A	0.183148		0000		0		N		N
TLX3	0.183087		0000		0		N		N
TMEM214	0.183028		0000		0		N		N
C1orf212	0.182923		0010		10		N		N
PITRM1	0.182828		0000		0		N		N
DNAJC11	0.182788		0000		0		N		N
PPIH	0.182766		1111		1111		Y		N
HPCAL1	0.182689		0000		0		N		N
C14orf80	0.182609		#N/A		#N/A		#N/A		N
APBA2	0.182535		0000		0		N		N
PARP1	0.182463		0000		0		N		N
TRABD	0.182428		#N/A		#N/A		#N/A		N
AMTN	0.182293		0000		0		N		N
SETD6	0.182169		0010		10		N		N
KYNU	0.182119		0000		0		N		N
HIST1H2AB	0.182104		1011		1011		Y		N
CDR2L	0.181788		#N/A		#N/A		#N/A		N
IFI44L	0.181781		0000		0		N		N
SF3B2	0.181739		0000		0		N		N
CTNNBL1	0.181636		0000		0		N		N
FAM158A	0.181595		#N/A		#N/A		#N/A		N
ADPRHL2	0.181532		0000		0		N		N
CKMT1B	0.181486		0000		0		N		N
LILRB4	0.181418		0000		0		N		N
GABRQ	0.181323		0000		0		N		N
VDAC2	0.181293		0000		0		N		N
TRIM10	0.18129		0000		0		N		N
PDCD1	0.181192		0000		0		N		N
PIM2	0.181143		0000		0		N		N
SLC9A6	0.18113		0000		0		N		N
C10orf125	0.181091		0000		0		N		N
F11R	0.181071		0000		0		N		N
SAP30BP	0.181062		0011		11		N		N
FATE1	0.181034		0000		0		N		N
FMNL2	0.180999		0000		0		N		N
MRPL33	0.180982		0000		0		N		N
MRPL33	0.180982		0000		0		N		N
MRPL33	0.180982		0000		0		N		N
TBCB	0.180955		0000		0		N		N
GNAI3	0.180942		0000		0		N		N
CYP2C18	0.180917		#N/A		#N/A		#N/A		N
DGUOK	0.180859		0010		10		N		N
NUP160	0.180855		0010		10		N		N
SPOCK2	0.180751		0000		0		N		N
ABT1	0.180674		0000		0		N		N
MAFA	0.180514		0000		0		N		N
TMPRSS4	0.180286		0000		0		N		N
UBQLN4	0.18025		0000		0		N		N
C1orf174	0.180081		#N/A		#N/A		#N/A		N
LSM3	0.180042		1111		1111		Y		N
HGS	0.179921		0010		10		N		N
MKI67IP	0.179914		0000		0		N		N
EXOSC3	0.179902		0000		0		N		N
XKR9	0.179878		0000		0		N		N
AGMAT	0.179842		0000		0		N		N
PADI2	0.179808		0000		0		N		N
NT5C3	0.179789		0000		0		N		N
NDUFB3	0.179696		0000		0		N		N
VPS37B	0.179673		0000		0		N		N
SIRPG	0.179639		0000		0		N		N
ZNF643	0.179617		0000		0		N		N
IFNAR2	0.1795		0000		0		N		N
CALM3	0.179481		0000		0		N		N
CNIH4	0.179423		0010		10		N		N
KLF5	0.179417		0001		1		N		N
[truncated: 20,150 more rows]

## Sheet: DREAM chIP Muller 2014
	E2F4/LIN54/LIN9/p130
APOBEC3B	1111
GTSE1	1111
UBE2C	1111
CDC45	1111
CENPA	1011
CDCA8	1111
KIF2C	1111
CCNB2	1111
HJURP	1111
RAD51	1111
TPX2	1111
MELK	1011
KIFC1	1111
CDC20	1111
PLK1	1111
CDCA5	1111
FOXM1	1011
CCNA2	1111
BUB1	1111
DEPDC1B	1111
CEP55	1111
AURKA	1111
MYBL2	0
CENPM	1111
APOBEC3A	#N/A
NDC80	1111
NCAPH	1111
MCM10	11
AURKB	1111
SKA1	1011
E2F2	1111
KIF4A	1111
BIRC5	1111
OIP5	1111
SGOL1	1111
CDCA3	1111
FAM83D	1111
DLGAP5	1111
PTTG1	1111
WDR62	1111
FAM54A	#N/A
NUSAP1	1111
FAM64A	1111
KPNA2	1111
CDK1	1111
RAD54L	1111
PRC1	1111
ORC1L	#N/A
NCAPG	1011
MAD2L1	1111
CENPN	1011
C15orf42	1111
DEPDC1	1111
SHCBP1	1111
CDKN3	1111
ORC6L	#N/A
TROAP	1111
TRIP13	1011
LMNB1	1111
BUB1B	1111
TCF19	1111
TYMS	0
CCNB1	1111
RRM2	1111
KIF18B	0
ASF1B	1011
KIF23	1011
CDC25A	1111
CDC25C	1111
E2F1	0
TTK	1111
SPC25	1111
ARHGAP11A	1111
CKAP2L	1111
KIF20A	1111
FANCA	0
MND1	1011
SKA3	1111
MKI67	1011
EXO1	1111
STMN1	0
STIL	1111
ANLN	1111
E2F8	11
BLM	1111
UBE2T	1111
RAD51AP1	1111
CENPW	0
DSCC1	1011
FAM72B	#N/A
GSG2	1111
CENPO	1111
NUF2	1111
H2AFZ	1011
SPAG5	1111
ERCC6L	0
IQGAP3	1111
POLQ	1111
C1orf135	#N/A
CDT1	0
NEIL3	1111
DIAPH3	1111
TACC3	0
CDCA2	1111
GINS3	1111
C12orf48	#N/A
MCM6	10
RACGAP1	1111
ZWINT	1111
KIF11	1111
TUBA1C	0
KIF15	1111
KIF18A	1111
ZNF367	1011
ASPM	1111
KIAA1524	1111
CENPI	0
NEK2	1111
ESPL1	1111
FANCI	1011
FEN1	1111
PKMYT1	0
C15orf23	10
MCM2	1011
CKS2	1011
MCM5	1111
CCNE1	0
TUBA1B	0
PCNA	1111
FAM72A	#N/A
HMMR	1111
CENPE	1111
CHAF1B	0
POC1A	1111
CDC25B	1011
PLK4	1111
PPIL5	#N/A
KIF14	1111
TK1	1111
CDC6	1111
C9orf100	1011
DSN1	1011
CLSPN	1011
GINS1	1111
MLF1IP	1111
CENPF	1111
RANBP1	10
CHEK1	1111
UHRF1	#N/A
KIF4B	11
FAM72D	#N/A
C9orf140	10
TUBB	11
TOP2A	1111
DONSON	0
UBE2S	1111
PIF1	1111
FBXO5	1111
CIT	1111
PBK	1111
C16orf61	#N/A
DBF4	1011
GPSM2	10
LRP8	0
CCNE2	0
PRR11	#N/A
HMGB2	1111
EZH2	0
CHEK2	1111
SPC24	1011
CKS1B	1111
ZNF695	0
MCM3	1011
CTPS	0
FAM111B	1011
EME1	1111
EME1	1111
SNRPA1	0
DDX39	#N/A
SGOL2	1111
MASTL	1111
ATAD2	1111
CTSL2	0
FANCB	1111
WDR67	1011
INCENP	1111
NCAPD2	1011
PDXP	#N/A
PHF5A	0
CDC7	1011
C17orf53	#N/A
NCAPG2	1111
FANCD2	1111
KIAA0101	1111
DTL	1111
E2F7	10
C20orf24	#N/A
RAD54B	1111
HAUS8	1111
ARHGAP11B	1111
POP1	0
RFC4	1011
COQ2	0
RECQL4	0
MCM7	1111
VRK1	11
CCT5	1000
TIMELESS	1011
LMNB2	0
SLC25A19	11
RCC1	0
NFKBIL2	#N/A
SLC7A5	0
TMEM189	#N/A
C16orf75	#N/A
CASC5	1111
NUDT5	0
PDSS1	0
THOC4	#N/A
DNAJC9	11
PSRC1	10
ECT2	0
ECT2	0
RAN	0
MCM4	1111
C5orf34	#N/A
POLE2	1111
CCDC99	1111
C4orf46	#N/A
NUP93	11
CENPL	1111
SUV39H2	0
HN1	11
DNMT3B	1011
TMPO	1111
MTHFD2	0
CCDC150	#N/A
C11orf82	1111
DNA2	1111
GMNN	1111
WDR76	#N/A
FAM136A	0
RNASEH2A	1011
GINS2	11
PSMA7	0
ADSL	0
RTKN2	1111
YARS	0
POLR2D	0
SMC4	1111
RFC2	0
ECE2	0
SLC25A5	#N/A
PRIM2	1011
C13orf34	#N/A
CBX2	0
CCDC18	#N/A
PNP	0
HELLS	1111
SHMT2	0
CENPK	1111
EBP	0
PSMD14	10
EIF2S2	0
EIF2S2	0
XRCC6	0
PSMB2	0
PIR	0
GINS4	1011
SUV39H1	0
PHF19	0
UFD1L	1111
TRAIP	1111
CDC123	0
GTPBP4	0
GPR172A	0
RHEBL1	10
SQLE	0
PGK1	0
WDHD1	1111
ESCO2	1111
HSPA14	#N/A
CDKN2D	1111
SNRPG	1011
C21orf45	#N/A
PSMD7	10
ACAT2	0
EIF2C2	0
AARS	0
CKAP2	1011
C6orf153	#N/A
PPM1G	0
H2AFX	1111
RPN1	0
ZWILCH	1111
DKC1	0
GMPS	0
GEN1	1111
BRIP1	1011
TOMM22	0
ATP5C1	0
PPIL1	10
GPRIN1	0
DTYMK	10
BEND3	#N/A
POLA2	1111
PSMD2	0
ANP32B	0
SH3BP1	0
C13orf27	#N/A
HIST1H3B	1111
GGH	1011
NRM	0
TBC1D7	0
LSM2	0
RFC3	1111
MARS	10
MYBL1	0
ENY2	1011
ADM2	0
RIPK2	0
SEPHS1	1
NUTF2	0
KIF20B	1111
TYRO3	0
CHAF1A	11
SAE1	1111
MTBP	1111
MTBP	1111
MTBP	1111
USP18	0
PPPDE2	#N/A
XPO5	0
DHCR7	0
GARS	0
CENPH	1111
EPCAM	0
NIP7	#N/A
CSE1L	1011
CDCA7	1111
CCT6A	10
RFWD3	1111
TPI1	0
RANGAP1	1111
AIF1L	0
CEBPG	0
DRG1	0
XRCC2	1111
CCNF	0
PSMD12	0
RIBC2	#N/A
SNRPD1	0
YWHAZ	0
CNIH2	0
TAF11	1011
ACTL6A	10
LIN9	1011
CHAC2	0
MRPL15	0
MRPL15	0
MRPL15	0
BAK1	0
RBL1	1111
COX4NB	0
GPR19	0
FDPS	10
CBS	0
MDH1	1111
FANCE	0
YBX1	11
FANCG	1111
C8orf76	0
CHRNA5	0
LRRC59	0
DCLRE1B	1011
KNTC1	1111
PSMA4	0
CHAC1	0
LSR	0
ACOT7	0
RBM17	0
SNRPD3	#N/A
C20orf20	0
PSMG1	0
HMGA1	0
TDO2	0
NDUFA6	0
NASP	1011
ILF2	1010
HDGF	10
WARS	0
HSPD1	0
CDCA4	0
PDHA1	0
PTMA	0
BYSL	0
NUDT1	1111
C16orf59	#N/A
DHTKD1	0
PITPNB	0
TTF2	1111
RCC2	0
TIMM8A	1011
IGF2BP3	0
KCMF1	0
SMC1B	0
MRPL13	1111
MRPL13	1111
MRPL13	1111
NCAPH2	0
UCK2	0
MSH2	0
MSH2	0
MSH2	0
MSH6	0
MSH6	0
MSH6	0
MRPL47	0
MRPL47	0
MRPL47	0
BRCA2	1111
CCL7	0
PTDSS1	0
SKP2	0
SCLT1	1111
PDCL3	0
PPP2R5D	0
NUDCD1	#N/A
SNRPC	0
IDI1	10
GAS2L3	1010
TOMM40	10
HNRNPAB	1011
UQCRHL	0
MRPS5	0
MRPS5	0
MRPS5	0
DEK	100
BID	0
RAD21	#N/A
JOSD1	0
CDK16	0
CHCHD3	1011
C6orf115	#N/A
CIRH1A	0
NUP85	1111
UQCRH	0
POLR2F	#N/A
HTATIP2	0
C18orf54	0
CABLES2	0
C16orf87	#N/A
ASNS	0
ELOVL1	0
ELOVL1	0
CYCS	1001
VGF	0
YWHAQ	0
ATP1B3	0
FAM49B	#N/A
SMC2	1111
RHEB	10
CEP152	1111
HIST1H2AH	1111
MTFR1	0
MRPL37	1
MRPL37	1
MRPL37	1
CDK2	1111
LAPTM4B	0
STIP1	0
ADAMDEC1	0
PSMC4	0
IMPA2	0
C16orf80	1011
DERL1	0
C6orf129	#N/A
TOMM5	0
RCCD1	#N/A
ANP32E	1111
KARS	0
TMEM65	0
FBXO45	10
PDCD5	0
CIAPIN1	0
P2RY6	0
TAP1	0
PIGW	11
ALG3	0
CENPQ	1111
CXCL10	0
RPP25	0
NDUFB9	0
C16orf57	0
SLBP	1011
A2ML1	0
FOXRED2	0
USP1	1011
SFRS2	#N/A
ATF4	1011
PRDX4	0
TXNRD1	0
BRIX1	1111
SF3B3	1
TAP2	0
ABCF1	0
PSMC2	1
FANCC	0
NKX1-2	0
CYC1	0
HDAC2	0
RNASEH1	0
OTX1	0
CXCL11	0
SRPK1	0
TCEB1	11
GPI	0
WDR4	0
TARS	0
CCDC90A	0
PNPT1	0
HIST1H1B	11
SNRPA	1111
TMEM194A	1111
BOLA3	0
DCAF13	0
PES1	1
C1orf112	#N/A
SMARCB1	0
IL1F9	#N/A
AQP9	0
FGF21	0
CCDC77	1111
TAGLN2	0
CCL18	0
HPRT1	0
YWHAH	0
NMU	0
MTERFD1	0
POLR2K	1011
C9orf40	#N/A
HCCS	1111
NOP58	1111
THOC5	11
DDN	0
MYO19	11
TMEM206	0
COX5A	0
PSMB5	10
SKA2	1111
NUP50	10
PNO1	1111
PAK1IP1	0
ACO2	0
RGS20	0
PDIA6	0
HSPE1	#N/A
VCP	0
HIST1H2BJ	1111
RDM1	1111
ACTR3	0
GAPDH	1011
TALDO1	0
MCM8	1111
HIST1H2BO	1011
ENO1	0
ENO1	0
CKLF	#N/A
FLVCR2	0
MARCO	0
NOP2	0
ATAD3A	0
NUP205	1011
SNX8	0
ARPC5L	0
MTCH2	0
MTCH2	0
MTCH2	0
KCNK12	0
LYAR	0
UBE2L3	0
RELT	10
FPR2	0
IDO1	0
SUMO2	0
C12orf32	1011
ATAD5	1111
ATP5G3	0
ATG3	0
NSDHL	0
ZDHHC18	0
PRDM13	0
DCLRE1C	1111
LAG3	0
RNF114	0
C11orf86	#N/A
CSTB	0
UNG	1011
GPN1	0
XPOT	0
ARL9	0
DNMT3A	0
NCL	0
UBA2	0
IL4I1	0
GPT2	0
CLCN5	0
C1orf106	#N/A
PLA2G7	0
CACYBP	1011
MED30	1011
NSUN2	0
LBR	0
RFC5	1111
MORC2	0
AHSA1	0
TCP1	1011
FAM127B	#N/A
HPSE	0
HMGB3	0
EIF4EBP1	0
EIF4EBP1	0
HTATSF1	0
PSME4	0
RBX1	110
TIPIN	1011
TPD52L2	1011
ZDHHC13	0
CDKN2C	0
NARF	0
KLHDC7B	#N/A
KCTD5	0
PSMC3IP	1111
DNMT1	0
AMD1	0
ADRM1	0
CLIC1	#N/A
HIST1H2BL	1111
ACBD7	0
ELAVL1	0
ELAVL1	0
FADS1	0
DBNDD1	0
FAIM	0
MXD3	1111
MMP1	0
RHBDF2	0
USP39	0
DMRT1	0
IRAK1	0
CFL1	1
C14orf145	#N/A
E2F3	1011
SSRP1	10
BOP1	0
LAD1	0
UBE2V2	0
TRIM47	0
MAGOH	1
SAC3D1	0
TMEM171	0
DPM1	0
C6orf167	#N/A
SRPRB	0
C1orf163	#N/A
NT5DC2	0
PRDX1	0
EML4	0
EML4	0
TMSB10	0
CASP3	0
CLN6	0
PSMB7	0
TAF5	0
SLC26A9	0
CDK4	0
CSNK2B	111
IL2RA	0
GPR56	0
LHX2	0
MTHFD1L	0
PYCR1	0
ANKRD54	0
GLT25D1	0
CHMP1A	0
MRPL12	#N/A
MRPL12	#N/A
MRPL12	#N/A
DHFR	0
HNRNPL	1011
FAM100B	#N/A
TCF20	0
HSF1	0
PUF60	100
CKAP5	1011
PRIM1	0
CBFB	0
PSMA5	0
CAMK1G	0
LAMP3	0
PSAT1	0
TERT	0
FAM131C	#N/A
ABCD1	0
DDX27	0
SFPQ	1011
ULBP1	111
SEC13	0
OASL	0
IL12RB2	0
FBXO43	0
RBM38	0
SRD5A1	0
NUP37	0
NUP62	0
MED8	0
UTP11L	0
CCT8	0
CPSF3	1
FOXK2	0
PLP2	0
ZBED4	0
TIMM17A	0
CHRAC1	0
MFSD2B	0
NPLOC4	0
GPR158	0
DPYSL5	0
VBP1	0
XK	0
TMEM97	1011
HK3	0
UQCR10	0
RNFT2	0
SIGMAR1	0
TH1L	0
MAGOHB	10
PPIAL4C	#N/A
IFI30	0
KCNG3	0
C18orf10	#N/A
IL29	0
MDC1	1111
TMSB15A	0
C7orf28A	#N/A
TLX3	0
PGD	0
SFN	0
NDUFA9	0
RBM28	0
STK38	0
TBRG4	0
MTHFD1	1011
TMEM201	0
WDR77	#N/A
C3orf37	#N/A
ESRP1	0
TIMM50	0
RGS9BP	0
NSMCE2	0
MANF	0
ITPR3	0
CECR5	0
SH2D2A	0
TMEM180	0
GRK6	0
RRP7A	11
GCH1	0
MRPL11	100
MRPL11	100
MRPL11	100
RPP40	0
PHGDH	0
SLC25A32	#N/A
MT1H	#N/A
MT1H	#N/A
MT1H	#N/A
WDR53	#N/A
SLMO2	0
PPIA	0
SLC25A43	0
GLRX3	0
R3HDM1	10
JMJD6	0
SHFM1	1011
WDR12	0
SLC2A6	0
MAPRE1	0
NAE1	0
TKT	0
TMEM132A	0
SBSN	0
FIGNL1	10
GAL	0
GALNS	0
ME2	0
XIRP1	0
CCT7	1
PSMD11	0
CCDC134	0
AGTPBP1	0
SET	0
SLC35B1	0
BCL2A1	0
PGAM5	0
ELF4	0
ELF4	0
TMEM194B	0
PSMD1	0
GTF3C5	0
HSP90AB1	0
NCS1	0
B3GNT4	0
CCL8	0
PSMD8	0
MRPL14	0
MRPL14	0
MRPL14	0
PPP1R14B	0
CALR	1011
GTPBP2	0
MVD	0
PSMC3	1010
CLEC6A	1
ABTB2	0
GZMB	0
COX7B	0
NOP56	0
RAET1L	0
SLC25A13	0
POLD1	1011
DNAJA1	0
RAP2B	11
PSMA6	0
CDK2AP1	0
GNL2	0
MTCH1	0
MTCH1	0
MTCH1	0
PRSS33	0
QSOX2	0
PSMB4	0
SCN1A	0
POP4	0
MURC	0
PANX2	0
AP1B1	0
POLE3	11
CMPK2	0
DDX11	1111
PFKP	0
COQ9	0
PSMA3	0
MRPS18A	11
MRPS18A	11
MRPS18A	11
FAM96B	0
GPR37	0
PA2G4	0
RTN4R	0
SLC15A1	0
PFN1	0
CALCB	0
PRKAG3	0
EWSR1	0
CCDC59	0
MRPL2	0
MRPL2	0
MRPL2	0
YEATS2	0
MAGEA6	0
CCT4	0
STAT1	1010
PLSCR1	0
ISL2	0
SLC3A2	1011
ACRV1	1
BTF3L4	#N/A
PREB	0
SASS6	1111
PAICS	0
FARSB	0
SLC4A5	0
GABBR2	0
EIF3B	0
EIF3B	0
DDT	0
PFDN4	0
ASCC2	0
TMEM151A	0
MRPS17	0
MRPS17	0
MRPS17	0
SLAMF8	0
PFDN2	0
NANP	0
UQCRFS1	0
HIST1H3J	11
ZC3H18	0
GDI2	0
OPRK1	0
U2AF1	0
ETV7	0
SMC6	1111
TRMU	0
HES6	0
C1QL4	0
ZBED2	0
GOT1	100
TOPBP1	0
FOXN2	1011
NRD1	1111
GFRA3	0
RRP1B	0
SLC36A4	0
TEAD4	0
NME1	#N/A
EIF2AK2	0
EIF2AK2	0
RPN2	10
UBAP2	#N/A
ISG20	0
HNRNPA2B1	1111
RTKN	0
MRPL36	0
MRPL36	0
MRPL36	0
SFT2D2	0
EXOSC9	1011
PTBP1	0
C4orf21	1111
PDCD2L	0
STRA8	0
MRPS12	0
MRPS12	0
MRPS12	0
PSMA2	10
ENOPH1	0
ENOPH1	0
SLC4A1AP	0
RTCD1	0
BAIAP2L2	0
OR2B6	0
RALY	0
REEP4	1111
ULBP2	0
POU4F1	0
NOL10	0
KLRG2	0
CTSC	0
GBP5	0
RPIA	0
EAF2	0
ATP6V1C2	0
HAUS7	0
LIG1	10
HNRNPD	0
MAGEA3	#N/A
GART	0
TRA2B	0
CCDC137	#N/A
LARP4B	0
RSU1	0
KRT78	0
WDR34	1
CORO1C	0
TET3	0
ZNF706	0
PPAT	0
INTS8	0
BMS1	100
DUS2L	0
MRPL48	0
MRPL48	0
MRPL48	0
WHSC1	0
INSIG1	0
PATL1	0
TPM3	0
MTA2	0
MTA2	0
MTA2	0
KHSRP	1011
PSIP1	0
APOO	0
ANKRD27	0
CD38	0
MRPS7	0
MRPS7	0
MRPS7	0
KCNJ10	0
ME1	0
EIF4A3	0
EIF4A3	0
SMCR7L	0
SNRPF	0
SH3BGRL3	0
CCDC21	#N/A
CXorf49B	#N/A
IFIH1	0
DHDH	0
IDH2	0
TMEM208	0
MRPL3	10
MRPL3	10
MRPL3	10
MEMO1	0
AHCY	0
NOL11	1
C8orf30A	#N/A
DCK	1011
KIF22	1011
NUDT19	0
FOXD1	0
ALPP	0
C1orf96	0
MRPS15	0
MRPS15	0
MRPS15	0
NIPSNAP1	0
GBP1	0
SRC	0
UPP1	0
DNTTIP1	0
NDRG1	0
HRK	0
PRPSAP1	1111
CEP78	1011
TMEM150B	0
SEC61A2	0
PSME2	1
GNAS	0
ICOS	0
CARS	0
SAP30	11
PLCH1	0
PSPH	10
HERC5	0
MTIF2	0
SEC61G	0
SPTBN2	0
TTC35	0
CXorf61	0
MICALL1	0
PDF	0
RHOF	0
DPH2	0
DAZAP1	0
TOMM34	0
FAM83F	#N/A
TXNL4B	0
RCOR2	0
RHBDL2	0
LSM4	0
C9orf30	#N/A
SLC25A10	0
HRH3	0
HNRNPA3	1011
NDUFAF4	0
ONECUT2	0
SLC16A3	0
THOC3	11
PAPD7	0
VAC14	0
L3MBTL2	10
TBR1	0
ISG15	0
DSC2	0
S100A8	0
BARD1	1111
SH3GL3	0
FADS2	10
LCT	0
DPF1	0
NR2C2AP	1
SPRR2A	0
IL20RB	0
DMBX1	0
C3orf26	1111
PPIAL4G	0
HAO1	0
POLR2C	0
EXOSC6	1011
HM13	0
CRELD2	0
ZNRF1	0
C15orf39	#N/A
CCDC86	0
FAM58A	0
CCT3	0
RAP2A	0
CYB5B	1011
NAGA	11
RHCG	0
UBE2O	0
IGF2BP1	0
HMGN2	0
SLC6A17	0
PCBP1	0
CSK	0
SLC25A17	0
LIN28B	0
CCL13	0
TDG	0
NAA10	0
PPP3R1	0
RUVBL1	0
TCOF1	0
ZC3H15	0
KIR2DL4	#N/A
MMP9	0
CCDC58	0
AP2M1	0
STRA13	0
C8orf55	11
WDYHV1	1
PPPDE1	#N/A
FPR3	0
KCNJ4	0
RAE1	0
MATN4	0
FZD9	0
CAMKV	0
AIMP2	0
C8orf33	#N/A
HIST1H2BK	1111
HIRA	0
GALR2	0
LGMN	0
ARPC2	0
HEATR3	0
PVR	0
C19orf40	1111
MAD2L2	0
P4HB	0
SMC1A	1011
C1orf198	#N/A
SLC43A3	0
RIOK1	0
MMP12	0
PWP2	0
BANF1	0
HPDL	0
PRAME	0
OTP	0
PPP1CA	0
PSMB1	0
RPUSD3	0
CXCL9	0
IL1F5	#N/A
MAGEA2	#N/A
XPNPEP3	0
MAGEA4	0
SNAI1	0
TRMT6	1111
ARPC5	0
ACTL8	0
EXOSC4	0
FAM171A2	0
INA	0
HIST1H2AL	1111
SETD8	1111
AFG3L2	0
RBM15	1111
SMS	0
HIST1H2AM	1011
CTLA4	0
CDC42EP1	0
SCNM1	101
APOBEC3F	0
COPG	0
UBE2A	0
GPR126	0
TRIM59	0
AKIRIN2	1111
NOP10	0
CLPTM1L	0
RTN4IP1	0
C1orf59	#N/A
XRCC6BP1	0
AIM2	0
C6orf136	0
CSNK2A2	0
PTRH2	0
BRI3BP	0
YIF1B	0
VSIG10L	0
RPP21	#N/A
GTPBP8	0
ATL2	0
APEX2	0
MPHOSPH10	0
MPHOSPH10	0
MPHOSPH10	0
MRPL18	1011
MRPL18	1011
MRPL18	1011
YRDC	0
MTDH	0
MTDH	0
MTDH	0
PDE7A	0
HR	0
CCDC138	#N/A
TEX19	0
CASP5	0
AMTN	0
CHORDC1	0
ACOT9	0
POR	0
TMEM48	1111
RPP38	0
PPARD	0
DDX19A	#N/A
EIF6	0
EIF6	0
FBXL6	0
CISD2	101
LCLAT1	0
PSMB9	0
XPO1	1011
UBXN2A	0
PSMC1	0
NUDT8	0
NR2E1	0
MKRN3	10
PI4K2B	0
RAX	0
DDC	0
POLDIP3	0
RASGEF1B	0
NUP155	1011
CTSL1	0
NXPH4	0
RPS19BP1	0
EIF5AL1	0
EIF5AL1	0
MYH15	0
OAS3	1011
C11orf84	#N/A
TRIM10	0
PARP2	0
PIGU	0
SPRR2E	0
MT1F	0
MT1F	0
MT1F	0
PGAM1	0
TEX261	0
TTL	0
SEL1L3	0
TUBB3	0
ELOVL7	0
ELOVL7	0
CPNE2	#N/A
TFDP1	0
POU5F1	0
EPSTI1	#N/A
CDKAL1	10
LSM6	0
CSAG1	#N/A
TATDN1	0
PRSS3	0
CXorf26	0
PAQR4	0
GUCA1A	0
DNAJC2	0
SPRR2D	0
ZNF639	0
PSMA1	1011
ZNF280A	0
SURF4	0
FAM192A	1010
S100A11	0
FUCA2	0
FETUB	0
PRELID1	0
FAM123B	0
ODC1	0
LTV1	#N/A
DAPK1	0
YBX2	0
LILRA5	0
GSTA2	0
FAM98A	#N/A
SLC19A1	0
SLC6A9	0
SCEL	0
CLTA	0
LPAR2	0
UBL4A	0
EIF4G1	0
EIF4G1	0
MRPS22	0
MRPS22	0
MRPS22	0
HORMAD1	0
LY6E	0
SLC35E4	0
SNRPB2	0
NUDT3	#N/A
RQCD1	1111
MLKL	0
PSMD10	0
NPM3	0
FOXA2	0
STARD7	0
DUSP9	0
NETO2	0
FAM105B	#N/A
HLA-A	0
TNFSF13B	0
SPIN4	0
TMEM165	0
MX1	0
HIATL1	0
SSB	0
NUDT15	1111
ITGA2B	0
NIPA2	0
C22orf28	0
SOX11	0
IL27	0
C8orf59	#N/A
TNIP3	#N/A
PFKL	0
TRIM65	0
C1orf38	0
LYPD5	0
BATF2	0
MYH7	0
KIN	0
CYP2C18	#N/A
TLCD1	0
TMEM52	0
LTA	0
ARNTL2	0
PDCD10	0
MDGA2	0
STAMBP	0
DEM1	0
TTLL4	0
KPNA4	0
HRASLS	0
HSD17B10	0
NRTN	0
CD80	0
TMEM51	0
MEX3A	0
HIST1H3C	1111
GABRA3	0
NUP188	0
G6PD	1000
LSG1	0
ATP5B	0
RPS6KB2	0
CCR1	0
TAF2	0
PITPNC1	0
COTL1	0
CTCFL	0
SCO2	0
UPF2	0
YKT6	0
CCR8	0
LMF2	0
EIF2B3	0
EIF2B3	0
POP7	1011
TLE1	0
NUS1	0
NAA50	0
FOXP3	0
GALNT3	0
CIB2	0
ZMYND19	0
MRPS23	0
MRPS23	0
MRPS23	0
SLCO4A1	0
SNRPB	1111
ARL6IP1	1111
HIST1H2BE	1011
TSPAN33	0
CSTF3	1011
CARHSP1	0
CTU2	0
PFDN6	0
TSPO	#N/A
COX6B1	0
SLC35A2	0
FOLH1	0
TNFRSF9	0
TMEM70	0
WSB2	0
IFI44	0
SEMA7A	0
DMRTA2	0
RDBP	0
IMMT	1011
TUBB2C	#N/A
MAGEB1	#N/A
PPP5C	1
RPL39L	10
LRRCC1	0
PABPC1	0
PDK1	0
NOP16	0
HIST1H2AG	1111
RASAL1	0
LRRC8B	0
YDJC	0
HLA-F	0
CCL20	0
EIF5A	0
EIF5A	0
BOLA2	#N/A
ATP5J2	#N/A
CLEC4D	0
KDM2B	0
MRPL51	1011
MRPL51	1011
MRPL51	1011
ZYG11A	0
CCT2	0
SLURP1	0
NHP2L1	1
MED27	0
E2F5	0
PGLYRP3	0
ASAP2	0
FSD1	0
METTL4	1111
PNPLA1	0
CCHCR1	1011
TUBB4	#N/A
TMEM54	0
VARS	0
TACO1	0
PARP12	0
MEA1	0
TMEM104	0
ART3	0
S100A10	0
PGLYRP4	0
PUSL1	0
DDOST	0
GHRHR	0
ARMC6	0
MRPL39	1
MRPL39	1
MRPL39	1
PRKX	0
AUP1	0
PGPEP1L	0
KCNV1	0
GALK1	0
ZDHHC12	0
C20orf11	10
NLRC5	0
ENHO	0
ENHO	0
CSF2	0
PROKR2	0
RASSF4	0
NONO	0
PLIN2	0
FKBPL	10
ARF1	0
RLBP1	0
E2F4	0
LYN	0
TIFAB	#N/A
ATP1A3	0
C19orf57	0
CKM	0
SLC7A1	0
APOL6	0
CDH24	0
SLC25A33	0
NKRF	0
NUP107	1111
TTC13	0
CLEC7A	0
DDX19B	0
XRCC3	0
UCHL5	0
POLR1C	0
HSP90B1	1111
SLCO5A1	0
RAB35	#N/A
PTPN2	0
CDK5R2	0
TOMM6	0
PSMG3	#N/A
UPF3B	0
TRIM43	0
SFRS7	#N/A
NOLC1	11
SEH1L	0
NDRG4	0
ACOT13	0
ZIC5	0
LAS1L	0
CLPB	0
KIAA1949	#N/A
PDX1	0
RASGEF1C	0
HIST1H3F	1111
KLK9	0
SLC1A5	0
MAF1	0
ESX1	0
TLX1	0
CTSA	#N/A
LIN37	0
FLAD1	1011
WDR5	0
CPSF4L	0
SFRS3	#N/A
LYZ	0
PPARGC1B	0
SRRD	0
RRM1	1111
GEMIN6	0
FTSJ2	1111
DDX28	0
WDR45L	0
CHIC2	0
ORAI1	0
HIST1H2AB	1011
YTHDF1	#N/A
HERC6	0
HIST1H4C	1011
KIAA1841	#N/A
ARRB2	0
SUMO3	0
SDF2L1	11
KCNK9	0
MYD88	0
C13orf37	#N/A
TBCE	0
TUBG1	0
NMI	0
KIAA0020	0
SLC7A11	0
SREBF2	0
UBASH3B	0
CAD	0
MYLK2	0
RRS1	0
SECTM1	0
HRSP12	0
EBNA1BP2	0
RRP1	0
B3GNT7	0
AK2	10
SMARCA4	0
SEC61A1	0
NOL7	0
NOC2L	0
BTG3	0
KRT83	0
PRMT1	0
MAD2L1BP	0
C21orf58	#N/A
SLC2A1	0
SLC25A1	0
CENPJ	11
CHCHD2	1011
GPC2	0
VDAC3	0
PREP	0
LCTL	0
HIST1H2AJ	1111
ADA	0
PMM1	0
VPS4A	0
FMR1	#N/A
NFE2L3	0
POLE	0
UNC93A	0
ERP44	0
TBC1D1	0
BRD7	0
PFN2	0
TFRC	0
UQCRB	0
ACP1	0
NHSL1	#N/A
TFG	0
APLP1	0
USP5	1011
C10orf99	0
USP10	0
MPHOSPH6	0
MPHOSPH6	0
MPHOSPH6	0
C6orf182	#N/A
TARDBP	0
KIAA0922	0
F5	0
CMAS	0
C12orf11	#N/A
IL32	0
KRT3	0
UGP2	0
GJB3	0
SLC35C1	0
PSAPL1	0
MAGEB4	#N/A
C7orf52	#N/A
KLHDC3	0
NEURL1B	0
RAB42	0
DPY30	0
FABP5	0
C1orf131	#N/A
FAM91A1	#N/A
GABRQ	0
POLR3G	0
OTUD6B	#N/A
TIGIT	0
TTC7A	0
SEC61B	0
PDIA4	11
PCYT2	0
TAF4	0
CTRL	0
TEX15	#N/A
HAPLN3	0
DMC1	0
DRAM1	0
RSAD2	0
PANK1	0
HLA-B	#N/A
C19orf48	#N/A
PDXK	0
SMAGP	0
OR56A3	0
HTRA4	0
KIAA0406	#N/A
CEP250	0
MX2	0
C20orf27	#N/A
GTF3C6	0
UMODL1	0
AZIN1	0
TNFRSF13C	0
OSTF1	0
GAN	0
FAM127C	#N/A
C11orf75	0
ZBTB32	0
COPS5	0
ACTR2	1
ZNF124	0
DDX49	0
SPATA12	#N/A
C6orf106	0
LAGE3	0
TTYH3	0
IFI27	0
EPRS	0
ABCB6	0
BRCA1	1111
SOCS1	0
HYLS1	0
FUT3	0
GNG4	0
SF3A3	0
EXT1	0
CHFR	0
LACTB2	0
XAGE2	#N/A
UTP18	0
FAF1	0
CEBPB	0
PABPC3	0
LPIN1	0
HTR6	0
FAM119A	#N/A
HAUS6	1111
IFNG	0
PTGES2	0
ANKLE1	0
CISD1	11
EIF1AD	0
EIF1AD	0
C19orf28	#N/A
XPNPEP1	0
JMJD4	#N/A
IL28A	0
B4GALT5	0
VPS35	1111
T	0
CASP2	0
MRTO4	11
MRTO4	11
MRTO4	11
MRS2	0
MRS2	0
MRS2	0
POLD2	0
LILRA6	#N/A
MRPL38	0
MRPL38	0
MRPL38	0
CDX2	0
C9orf25	#N/A
SERBP1	1
NFKBIE	0
ALAS1	0
KHK	0
LSS	0
RDH10	0
METTL11A	0
PLOD3	0
CSTA	0
TEX10	0
SFRS1	#N/A
TBC1D22B	0
CCL5	0
NCF2	0
SLC2A5	0
GPS1	0
ZIC3	0
GPR180	0
PRKDC	1111
RENBP	0
YWHAG	0
RHBDD3	0
ZBTB8OS	#N/A
TRIM15	#N/A
C11orf80	#N/A
IFI6	0
AADAT	0
CAMK2N2	0
TYMP	0
SENP5	0
TGIF2	0
VANGL1	0
IGF2BP2	0
FKBP1A	0
WDR43	0
LUZP4	0
NT5C2	0
LDOC1	0
IWS1	0
ZNF259	0
RAB1A	0
SDHB	0
RNF19B	0
B3GNT3	0
MAST1	0
TIMM44	0
TTLL12	0
CBX3	1011
SMNDC1	0
NKIRAS2	0
IMPDH1	0
FOXI3	0
TGFA	0
RABIF	0
HAUS5	1011
KIF21A	0
LDHB	0
ITLN1	0
CA9	0
CHRNB4	0
GJB6	0
CNGB1	0
LIMD2	0
BCL2L12	10
HSP90AA1	0
DCPS	10
RBM14	1011
UMPS	0
EXOSC2	0
MRPS10	0
MRPS10	0
MRPS10	0
POLD3	10
STAM	0
LSM14B	0
URB2	0
PKP1	0
PGBD5	0
IL10	0
CDH3	0
CKB	0
RTP4	0
ICT1	0
GTF3C2	1011
ARL6IP6	0
HTN1	0
TMCC2	0
NXT1	10
KDELR3	0
KCNG1	0
KATNA1	10
MYL12A	0
IVL	0
GOLT1B	1111
ZNF165	0
STOML2	10
PSMB8	1
LILRB2	0
IFIT3	0
WRNIP1	0
GLRX2	0
MVK	0
FAM83B	#N/A
PDAP1	0
NOL12	0
DLGAP3	0
SLC28A1	0
TRNAU1AP	0
C1orf31	0
PARD3	0
COQ3	0
LRFN4	0
ECEL1	0
TRIML2	0
USP6NL	0
KRT85	0
OLIG2	0
C4orf51	#N/A
OGFOD1	0
VAX1	0
C6orf223	#N/A
FGD1	0
IBSP	0
ARL5B	0
SSX1	0
TOP1MT	0
HMGCS1	0
CHIA	0
PPIF	0
TMSB15B	0
ACOT11	0
ISY1	#N/A
MBD2	0
KTI12	0
DIAPH1	0
HEBP2	0
PSMD3	0
CLDN23	0
NCAPD3	1111
GTPBP1	0
TBCC	0
CNOT1	10
SPRR1B	0
MAP7D2	#N/A
ZNF74	0
BLOC1S3	1011
VCAM1	0
GMPR	0
MTPAP	0
MCAT	0
GPR37L1	0
DHX38	0
ERO1L	0
MTSS1L	0
FBXO7	0
ARMC1	11
MSL3	0
MSL3	0
MSL3	0
FOXP4	0
SRCRB4D	0
CD7	0
C17orf96	#N/A
USP13	0
TIMM10	10
UGT2B7	0
HMBS	1010
NDUFA12	0
FAM60A	#N/A
EIF3C	11
EIF3C	11
C19orf59	0
BCAP31	0
KIF24	1111
DPP3	0
ABP1	0
CLEC4E	0
IFNA10	0
PIM1	0
PTS	0
SLC44A2	0
PCK2	0
C21orf70	#N/A
CAPZA1	1
MDH2	0
RBM8A	111
APRT	0
MPST	0
MPST	0
MPST	0
DUS1L	0
DHODH	0
SRM	0
KREMEN2	0
VAPB	0
CHD7	0
GGCT	1011
KLF11	0
FOSL1	0
PUS7	0
SPDYC	0
THAP11	0
PPFIA3	0
SMYD2	0
C10orf119	#N/A
BCR	0
ACTB	0
GCAT	0
SLC22A16	0
C3orf58	0
HIST1H2BN	1111
NHLH1	0
CSPG5	0
LAP3	11
SMG5	10
SAMD1	0
TM7SF4	0
ARPC4	#N/A
APBA2	0
EDEM2	0
EDEM2	0
ATP5E	0
GYG1	0
PPIH	1111
SLC26A6	#N/A
AIFM1	1011
FAM57A	0
SLC16A13	0
MAFA	0
DNAJC11	0
ZBP1	0
IDH3A	0
ITGB7	0
ACAD9	0
CARD17	#N/A
S100A9	0
ACTN4	10
MRPS24	0
MRPS24	0
MRPS24	0
WNT10B	0
NF2	0
CUL2	0
ABT1	0
CHMP4C	0
SRP68	0
KDELR2	0
DDX18	0
KIF1A	0
DLGAP4	0
PODXL2	0
FAM81A	#N/A
C1orf212	10
HMSD	0
SMPX	0
TIPRL	0
PARP1	0
PDIA5	0
PHF20L1	0
TRIM16	#N/A
MUC16	0
TTC9C	#N/A
SLC38A3	0
CD72	0
DAZL	0
FTSJ3	0
MICAL3	0
RGS19	0
GPR84	0
DBI	0
APOC1	0
ATP5H	0
LILRB3	0
DNAJC5B	0
PITRM1	0
RAD23A	0
COX4I1	0
COG4	1
SLAMF7	0
GAR1	0
ATOH7	0
SPRR1A	0
HIST2H3C	1111
TGS1	1
ZNF643	0
FANCL	0
MKI67IP	0
DGUOK	10
MRPS11	1011
[truncated: 16,897 more rows]

## Sheet: Muller 2014, all genes
Genes	Transcript ID	TSS	Strand	Promoter-Region	avgMAT	DREAM	MMB	FOXM1	Cell-Cycle-Peak	CHR_0.9	CHR_0.1	E2F_0.9	MBS_0.9	FBS_0.9	WF	SV	BJ	GT	CHR-like-d1_0.9	CDE-CHR-like-d2_0.9	CHR-like-d2_0.9
A1BG	uc002qsd.4	chr19:58864865	-	chr19:58864803-58865065		0000
A1CF	uc010qhn.2	chr10:52645435	-	chr10:52645235-52645635		0000				TTTGAT_1.000_+_-1	TTTGAT_1.000_+_-1	TTCCGGG_1.000_+_64		AAATA_0.977_-_121					TTTGAT_1.000_+_-1 TTTGGA_1.000_+_-8 GTTGAA_0.998_+_35 TCTGAA_1.000_+_79 TTTGAC_1.000_-_-94
A2LD1	uc001voq.2	chr13:101186056	-	chr13:101185856-101186256		0000					TTTGAG_0.222_+_-17
A2M	uc009zgk.1	chr12:9268558	-	chr12:9268445-9268758		0000			M/G1					AAACA_1.000_-_-6 AAACA_1.000_-_-37		M/G1			TTTGCA_0.989_+_-4
A2ML1	uc001quz.4	chr12:8975149	+	chr12:8974949-8975247		0000
A4GALT	uc003bdb.3	chr22:43116876	-	chr22:43116676-43117076		0000
A4GNT	uc003ers.2	chr3:137851229	-	chr3:137851029-137851429		0000
AAAS	uc001scr.4	chr12:53715412	-	chr12:53715249-53715612	8.23	0011						TTCCCGG_0.988_-_80
AACS	uc001uhc.3	chr12:125549924	+	chr12:125549724-125550124		0000
AADAC	uc003eze.3	chr3:151531860	+	chr3:151531660-151531950		0000			G2									G2
AADACL2	uc010hvn.3	chr3:151451703	+	chr3:151451503-151451823		0000
AADACL3	uc009vnn.1	chr1:12776117	+	chr1:12775917-12776317		0000
AADACL4	uc001auf.3	chr1:12704565	+	chr1:12704365-12704565		0000
AADAT	uc003isr.3	chr4:171011183	-	chr4:171010983-171011383		0000
AAGAB	uc002aqk.4	chr15:67547074	-	chr15:67546969-67547234		0000						TTCCGCC_0.998_-_61
AAK1	uc010fdm.1	chr2:69870977	-	chr2:69870777-69871177		0000				TTTGTA_1.000_+_-181	TTTGTA_1.000_+_-181	TTCCGGC_1.000_+_30							TTTGTA_1.000_+_-181	CCGGCG_1.000_+_32_AGTGAA_0.998_-_42	CCGGCG_1.000_+_32_AGTGAA_0.998_-_42
AAMP	uc002vhl.3	chr2:219134893	-	chr2:219134809-219135093		0000						TTCCGCG_1.000_+_10 TTGGGCC_1.000_+_47 TTGCGCC_0.986_+_74		AAACA_0.999_-_-188
AANAT	uc002jro.3	chr17:74463629	+	chr17:74463429-74463829		0000
AARS	uc002eyn.1	chr16:70323412	-	chr16:70323212-70323612		0000
AARS2	uc010jza.1	chr6:44281063	-	chr6:44281060-44281263	9.515	0011					TAGGAA_0.616_+_-64
AARSD1	uc010whh.2	chr17:41132545	-	chr17:41132345-41132593		0000						TTCCCGG_1.000_+_-48	CAACGG_0.983_+_0
AASDH	uc011cab.2	chr4:57253638	-	chr4:57253438-57253838		0000
AASDHPPT	uc001pjc.1	chr11:105948291	+	chr11:105948091-105948437		0000
AASS	uc003vkb.3	chr7:121784344	-	chr7:121784144-121784544		0000
AATF	uc002hni.3	chr17:35306174	+	chr17:35305974-35306374		0000						TTCCGGG_1.000_-_86
AATK	uc010dia.3	chr17:79139872	-	chr17:79139792-79140072		0000														CGCCCG_0.994_+_-163_TCCGAA_1.000_-_-153 CGCCCG_0.994_+_-163_TTCGGA_1.000_+_-153	CGCCCG_0.994_+_-163_TCCGAA_1.000_-_-153 CGCCCG_0.994_+_-163_TTCGGA_1.000_+_-153
ABAT	uc002czc.4	chr16:8768443	+	chr16:8768243-8768643		0000						TTCCCCC_0.999_-_21
ABCA1	uc004bcl.3	chr9:107690527	-	chr9:107690327-107690727		0000						TTGCCGG_0.999_-_76		AAACA_1.000_+_-25					TTTGAC_0.993_+_19
ABCA10	uc010dfa.1	chr17:67240956	-	chr17:67240756-67241156		0000								AAATA_0.992_-_172					TTTTAA_0.940_+_175
ABCA11P	uc003gac.2	chr4:467998	-	chr4:467798-468198		0000
ABCA12	uc010zjn.2	chr2:216003151	-	chr2:216002951-216003351	5.56	0100				TTTAAA_0.938_+_-55	TTTAAA_0.938_+_-55			AAATA_0.922_+_-51					TTTTAA_0.942_-_-54 TTTAAA_0.938_+_-55 TTTAAA_0.938_-_-55 TCTGAA_0.923_+_-119
ABCA13	uc003toq.2	chr7:48211056	+	chr7:48210856-48211080		0000
ABCA2	uc022bpz.1	chr9:139922740	-	chr9:139922592-139922940		0000														GCGCGG_0.002_+_-63_CTTAAA_0.920_-_-53 GCGCGG_0.002_+_-63_TTTAAG_0.920_+_-53
ABCA3	uc010bsl.1	chr16:2390747	-	chr16:2390547-2390947		0000
ABCA4	uc001dqh.3	chr1:94586705	-	chr1:94586601-94586905		0000					TTTGAA_0.893_+_-37								TTTTAA_0.975_-_-53
ABCA5	uc002jig.2	chr17:67323323	-	chr17:67323123-67323523		0000			S-phase						S-phase		G1/S
ABCA6	uc002jhw.1	chr17:67138015	-	chr17:67137815-67138215		0000								AAACA_0.929_+_-67 AAACA_0.984_+_-158					TTTCAA_0.995_-_-176 GTTGAA_0.993_+_-177
ABCA7	uc010dsa.3	chr19:1040101	+	chr19:1039901-1040301		0000			G1/S						G1/S					CGCGCG_0.000_+_-161_CTTTAA_0.973_+_-151 GCGCGG_0.000_+_-160_CTTAAA_0.997_-_-150 GCGCGG_0.000_+_-160_TTTAAG_0.997_+_-150
ABCA8	uc010wqr.2	chr17:66951533	-	chr17:66951333-66951733		0000
ABCA9	uc002jhu.3	chr17:67057136	-	chr17:67056936-67057336		0000								AAACA_0.987_-_96 AAACA_0.945_+_-112					TTTTAA_0.923_-_18 TGTGAA_0.983_+_52
ABCB1	uc003uiz.2	chr7:87342639	-	chr7:87342439-87342839		0000					CTTGAA_0.755_-_-51								TGTGAA_1.000_+_43
ABCB10	uc001htp.4	chr1:229694442	-	chr1:229694399-229694642		0000
ABCB11	uc002ueo.1	chr2:169887833	-	chr2:169887633-169888033		0000					TTTGAA_0.823_+_-24 CTTGAA_0.257_+_-34			AAATA_0.997_+_-48					TTGGAA_0.950_+_17
ABCB4	uc003uiv.1	chr7:87105019	-	chr7:87104819-87105219		0000														GGCCGC_0.001_+_-13_TTTGCT_0.913_-_-3
ABCB5	uc010kuh.3	chr7:20655244	+	chr7:20655044-20655444		0000					TTTGTA_0.116_+_-113
ABCB6	uc010fwe.2	chr2:220085174	-	chr2:220085174-220085374		0000
ABCB7	uc004ebz.3	chrX:74376132	-	chrX:74376107-74376332	5.84	0010
ABCB8	uc003wii.2	chr7:150725509	+	chr7:150725309-150725553		0000
ABCB9	uc021rfp.1	chr12:123451056	-	chr12:123450856-123451256		0000
ABCC1	uc010bvi.3	chr16:16043433	+	chr16:16043233-16043608		0000			M/G1			TTGGCCC_0.985_-_-6				M/G1
ABCC10	uc003ouy.1	chr6:43395291	+	chr6:43395091-43395491		0000													TTGGAA_0.977_-_23
ABCC11	uc002efg.1	chr16:48269088	-	chr16:48268888-48269288		0000					TTTGAA_0.128_-_-156
ABCC12	uc002efc.1	chr16:48180681	-	chr16:48180481-48180881		0000
ABCC13	uc002yjr.3	chr21:15646119	+	chr21:15645919-15646319		0000
ABCC2	uc001kqf.2	chr10:101542462	+	chr10:101542262-101542601		0000			S-phase						S-phase
ABCC3	uc002isk.4	chr17:48712217	+	chr17:48712017-48712297		0000
ABCC4	uc010afl.1	chr13:95953687	-	chr13:95953568-95953887		0000			M/G1			TTCCGGG_0.955_-_-32				M/G1
ABCC5	uc010hxo.3	chr3:183735727	-	chr3:183735527-183735927		0000			S-phase					AAACA_1.000_-_36	S-phase					CCGGCG_0.100_+_-105_TGGGAA_0.950_+_-95
ABCC6	uc002den.4	chr16:16317328	-	chr16:16317291-16317528		0000					TTCGAG_0.504_-_-98
ABCC6P1	uc002dfg.3	chr16:18582569	+	chr16:18582369-18582769		0000					TTCGAG_0.447_-_-105
ABCC6P2	uc002dcu.2	chr16:14918559	-	chr16:14918526-14918759		0000					TTCGAG_0.741_-_-102
ABCC8	uc010rcy.1	chr11:17498449	-	chr11:17498323-17498649		0000
ABCC9	uc001rfi.1	chr12:22089628	-	chr12:22089608-22089828		0000
ABCD1	uc004fif.2	chrX:152990322	+	chrX:152990122-152990522		0000
ABCD2	uc001rmb.2	chr12:40013843	-	chr12:40013643-40014043		0000				CTTGAA_0.982_-_119	CTTGAA_0.982_-_119 TTTGAA_0.685_-_126			AAATA_1.000_+_50 AAACA_0.993_-_78					TTTGGA_0.999_-_45 TCTGAA_0.927_+_-46 TTTTAA_0.998_+_59 TCTGAA_0.999_+_68 TTGGAA_0.995_+_-117 TTTCAA_0.973_+_118 CTTGAA_0.982_-_119 TCTGAA_0.986_+_-184
ABCD3	uc001dqm.4	chr1:94883932	+	chr1:94883732-94884034		0000
ABCD4	uc001xps.2	chr14:74769767	-	chr14:74769615-74769967		0000					TTTGAT_0.544_-_47	TTCCGGG_0.998_+_10
ABCE1	uc003ijy.3	chr4:146019155	+	chr4:146018955-146019355		0000
ABCF1	uc003nqk.2	chr6:30539169	+	chr6:30538969-30539264		0000						TTCCGGC_0.991_-_41		AAATA_0.991_+_52
ABCF2	uc003wjp.3	chr7:150924317	-	chr7:150924117-150924517	6.865	1010													TTGGAA_0.989_-_-55
ABCF3	uc003fmz.2	chr3:183903862	+	chr3:183903662-183903995		0000
ABCG1	uc002zap.3	chr21:43639266	+	chr21:43639066-43639372		0000								AAACA_0.987_+_-127
ABCG2	uc003hrj.1	chr4:89080011	-	chr4:89079811-89080211		0000
ABCG4	uc001pvs.3	chr11:119019749	+	chr11:119019549-119019949		0000			G2/M									G2/M		CGCGGG_0.828_+_-39_TCTTAA_1.000_-_-29 GCGCGG_0.678_+_-40_CTTAAA_1.000_-_-30 GCGCGG_0.678_+_-40_TTTAAG_1.000_+_-30 GCGGGC_0.957_+_-38_TAAGAA_1.000_+_-28 GGCGCG_0.513_+_-41_CTTTAA_1.000_+_-31	GCGGGC_0.957_+_-38_TAAGAA_1.000_+_-28
ABCG5	uc002rtn.3	chr2:44065958	-	chr2:44065818-44066158		0000
ABCG8	uc010yoa.2	chr2:44066102	+	chr2:44065902-44066192		0000
ABHD1	uc002rit.3	chr2:27346656	+	chr2:27346456-27346816		0000
ABHD10	uc003dyk.4	chr3:111697827	+	chr3:111697627-111697908	6.81	0001			S-phase						S-phase		G1/S
ABHD11	uc011kfb.2	chr7:73153190	-	chr7:73153127-73153390		0000
ABHD12	uc002wuq.3	chr20:25371618	-	chr20:25371418-25371818		0000
ABHD12B	uc001wyq.3	chr14:51338877	+	chr14:51338677-51338892		0000
ABHD13	uc001vqq.3	chr13:108870762	+	chr13:108870562-108870962		0000						TTGCCGG_0.994_+_47 TTCCGGC_0.974_-_70								GGCGGG_0.968_+_36_TTTGCC_0.989_+_46	GGCGGG_0.968_+_36_TTTGCC_0.989_+_46
ABHD14A	uc010hlz.2	chr3:52009041	+	chr3:52008841-52009151		0000
ABHD14B	uc021wza.1	chr3:52008646	-	chr3:52008446-52008846		0000
ABHD15	uc002hed.2	chr17:27894042	-	chr17:27893984-27894242		0000				TTTGTA_1.000_-_-152	TTTGTA_1.000_-_-152								TTTGTA_1.000_-_-152
ABHD16A	uc003nvy.2	chr6:31671137	-	chr6:31671058-31671337		0000
ABHD16B	uc002ygx.1	chr20:62492565	+	chr20:62492365-62492765		0000
ABHD2	uc002bnk.2	chr15:89631380	+	chr15:89631180-89631580	7.55667	1110					TTTGAT_0.128_-_-20								TTTGAC_0.993_-_74
ABHD3	uc002ktl.2	chr18:19284766	-	chr18:19284626-19284966		0000			G1/S								G1/S
ABHD4	uc001wgm.3	chr14:23067146	+	chr14:23066946-23067215		0000			S-phase					AAACA_1.000_-_62		S-phase		S
ABHD5	uc003cmx.3	chr3:43732374	+	chr3:43732174-43732484		0000			G1/S		TTCGAG_0.142_+_75						G1/S
ABHD6	uc003djt.4	chr3:58223258	+	chr3:58223058-58223458		0000
ABHD8	uc002ngb.4	chr19:17414282	-	chr19:17414082-17414482		0000														CGCGCC_0.895_+_138_TGTAAA_0.999_+_148 CGCGCC_0.895_+_138_TTTACA_0.999_-_148
ABI1	uc010qdk.2	chr10:27150016	-	chr10:27149816-27150216		0000					TTTGTA_0.896_+_130
ABI2	uc010zii.2	chr2:204193002	+	chr2:204192802-204193202		0000						TTCCGGC_1.000_-_-79								CGGGCG_0.991_+_-51_TGGGAA_1.000_+_-41	CGGGCG_0.991_+_-51_TGGGAA_1.000_+_-41
ABI3	uc002ioq.1	chr17:47287588	+	chr17:47287388-47287788		0000
ABI3BP	uc003duo.2	chr3:100712334	-	chr3:100712249-100712534		0000								AAACA_0.997_-_-106
ABL1	uc004bzw.3	chr9:133710830	+	chr9:133710630-133710833		0000
ABL2	uc010pne.2	chr1:179112224	-	chr1:179112179-179112424		0000			S-phase							S-phase			TTAGAA_1.000_-_-13
ABLIM1	uc021pyx.1	chr10:116418058	-	chr10:116417959-116418258		0000
ABLIM2	uc003gks.3	chr4:8160559	-	chr4:8160416-8160759		0000
ABLIM3	uc003lpy.2	chr5:148521053	+	chr5:148520853-148521253		0000				TTCGAG_0.963_+_78	TTCGAG_0.963_+_78 CTTGAA_0.282_+_191	TTCCGGG_0.999_+_170
ABO	uc010nag.1	chr9:136150630	-	chr9:136150605-136150830		0000
ABP1	uc003whz.1	chr7:150549572	+	chr7:150549372-150549772		0000					CTTGAA_0.126_-_3
ABR	uc002fsd.3	chr17:1083131	-	chr17:1083021-1083331		0000						TTCGGCC_0.959_+_21 TTGCGCG_0.999_+_60
ABRA	uc003ymm.4	chr8:107782472	-	chr8:107782418-107782672		0000				TTTAAA_0.999_+_-28	TTTAAA_0.999_+_-28			AAATA_1.000_-_-30					TTTAAA_0.999_+_-28 TTTAAA_0.999_-_-28
ABT1	uc003nii.3	chr6:26597170	+	chr6:26596970-26597210		0000
ABTB1	uc003ejt.3	chr3:127391780	+	chr3:127391580-127391868		0000			S-phase					AAACA_0.923_-_20				S
ABTB2	uc001mvl.2	chr11:34379555	-	chr11:34379355-34379755		0000													TTTGCA_0.999_+_-55
ACAA1	uc003chu.3	chr3:38178733	-	chr3:38178533-38178933		0000
ACAA2	uc002ldw.4	chr18:47340251	-	chr18:47340051-47340451		0000
ACACA	uc002hnq.2	chr17:35766902	-	chr17:35766702-35767102		0000			G1/S									G1/S
ACACB	uc001toc.3	chr12:109577201	+	chr12:109577001-109577210		0000			M/G1							M/G1
ACAD10	uc009zvx.3	chr12:112123856	+	chr12:112123656-112124056		0000						TTCCGCC_1.000_+_-89
ACAD8	uc001qhk.3	chr11:134123433	+	chr11:134123233-134123494		0000
ACAD9	uc003elb.3	chr3:128598332	+	chr3:128598132-128598532		0000
ACADL	uc002vdz.4	chr2:211090215	-	chr2:211090015-211090415	7.59	0001
ACADM	uc001dgw.4	chr1:76190042	+	chr1:76189842-76190242		0000
ACADS	uc010szl.1	chr12:121163570	+	chr12:121163370-121163688		0000
ACADSB	uc001lhb.3	chr10:124768428	+	chr10:124768228-124768545		0000						TTCCCGC_0.995_+_-103								CGCCGC_0.961_+_-134_TTTGTT_0.999_+_-124	CGCCGC_0.961_+_-134_TTTGTT_0.999_+_-124
ACADVL	uc010vtq.1	chr17:7123152	+	chr17:7122952-7123165		0000
ACAN	uc010upp.1	chr15:89346673	+	chr15:89346473-89346873		0000														CCGGCC_0.355_+_89_TCTGAC_0.930_+_99 CCGGGC_0.981_+_121_ACTGAA_0.941_-_131 CGCCCG_1.000_+_-48_TATGTA_1.000_+_-38 TCCCCG_0.998_+_9_TCTGGA_0.978_-_19 TCCGGG_0.976_+_120_TTTCAG_0.952_+_130	CCGGGC_0.981_+_121_ACTGAA_0.941_-_131 CGCCCG_1.000_+_-48_TATGTA_1.000_+_-38 TCCCCG_0.998_+_9_TCTGGA_0.978_-_19 TCCGGG_0.976_+_120_TTTCAG_0.952_+_130
ACAP1	uc002ggd.2	chr17:7239847	+	chr17:7239647-7240047		0000
ACAP2	uc003fun.4	chr3:195163817	-	chr3:195163617-195164017		0000						TTGGGGC_1.000_+_34 TTGCCCG_0.931_+_-82 TTGCGCG_0.996_-_130								TCGCGG_0.903_+_87_TATGAC_1.000_+_97	TCGCGG_0.903_+_87_TATGAC_1.000_+_97
ACAP3	uc001aeb.2	chr1:1243269	-	chr1:1243195-1243469		0000														GGCGGC_0.225_+_-107_TTTGGC_0.984_+_-97
ACAT1	uc001pjy.3	chr11:107992257	+	chr11:107992057-107992333		0000
ACAT2	uc010kjy.3	chr6:160182988	+	chr6:160182788-160183025		0000
ACBD3	uc001hpy.3	chr1:226374423	-	chr1:226374376-226374623		0000
ACBD4	uc002iic.3	chr17:43213013	+	chr17:43212813-43213213		0000				TAGGAA_0.973_+_43 CTTGAA_1.000_+_-81	TAGGAA_0.973_+_43 CTTGAA_1.000_+_-81			AAACA_0.940_+_-35					TTTCAA_0.999_-_-80 CTTGAA_1.000_+_-81 TTTGCA_0.933_+_-91	CCGGGG_0.553_+_33_TAGGAA_0.973_+_43
ACBD5	uc010qdp.2	chr10:27529808	-	chr10:27529617-27530008		0000
ACBD6	uc001gog.3	chr1:180472022	-	chr1:180471822-180472222		0000						TTCCCGC_0.979_+_-1
ACBD7	uc010qby.1	chr10:15130775	-	chr10:15130727-15130975		0000
ACCN1	uc002hhu.3	chr17:32483825	-	chr17:32483625-32484025		0000				TTTGAA_1.000_+_75	TTTGAA_1.000_+_75			AAATA_1.000_+_27 AAATA_1.000_-_-38 AAACA_1.000_+_93 AAACA_1.000_-_-110					TTTGAA_1.000_+_75 TTTTAA_1.000_+_-80 TTTTAA_1.000_+_-108
ACCN2	uc009zln.3	chr12:50451486	+	chr12:50451286-50451686		0000
ACCN3	uc003wip.2	chr7:150745604	+	chr7:150745404-150745804		0000														CCCCCC_0.964_+_-10_GCTGAA_1.000_+_0	CCCCCC_0.964_+_-10_GCTGAA_1.000_+_0
ACCN4	uc002vly.2	chr2:220378891	+	chr2:220378691-220379065		0000
ACCN5	uc003ipe.1	chr4:156787425	-	chr4:156787378-156787625		0000				TTTAAA_0.999_+_-76	TTTAAA_0.999_+_-76		CAACTG_0.993_+_-48	AAATA_0.994_-_-39 AAACA_1.000_+_-81					TTTAAA_0.999_+_-76 TTTAAA_0.999_-_-76
ACCS	uc009yks.1	chr11:44087728	+	chr11:44087528-44087928		0000
ACCSL	uc009ykr.2	chr11:44069530	+	chr11:44069330-44069586		0000
ACD	uc002etp.4	chr16:67694718	-	chr16:67694518-67694918		0000			G1/S	TAGGAA_0.995_+_-45	TAGGAA_0.995_+_-45				G1/S
ACE	uc010wpi.2	chr17:61554421	+	chr17:61554221-61554455		0000
ACE2	uc004cxb.2	chrX:15620192	-	chrX:15619992-15620392		0000					TTTAAA_0.818_+_-117 TTTGAA_0.176_+_104			AAATA_0.970_+_-178 AAACA_1.000_-_-195					TGTGAA_0.978_-_-155
ACER1	uc002mel.2	chr19:6333640	-	chr19:6333562-6333840		0000
ACER2	uc003zny.1	chr9:19408924	+	chr9:19408724-19409082		0000
ACER3	uc010rsi.1	chr11:76571916	+	chr11:76571716-76572020		0000
ACHE	uc003uxh.3	chr7:100493541	-	chr7:100493341-100493741		0000						TTCCCCG_0.984_-_54								GGCGGC_0.999_+_21_TCTGAC_0.998_-_31	GGCGGC_0.999_+_21_TCTGAC_0.998_-_31
ACIN1	uc001wit.4	chr14:23564823	-	chr14:23564623-23565023		0000						TTGGGGC_0.920_-_129		AAACA_0.994_+_134 AAATA_0.979_+_173					TTGGAA_0.930_-_62
ACLY	uc002hyh.3	chr17:40075272	-	chr17:40075267-40075472		0000
ACMSD	uc002ttz.3	chr2:135596185	+	chr2:135595985-135596252		0000					TTTGAA_0.842_+_-106			AAACA_0.970_+_-115
ACN9	uc003uoo.4	chr7:96745904	+	chr7:96745704-96746104		0000			G1/S									G1/S
ACO1	uc010mjh.1	chr9:32384600	+	chr9:32384400-32384800		0000
ACO2	uc003bac.3	chr22:41865128	+	chr22:41864928-41865150		0000					TTTAAA_0.821_+_-36
ACOT11	uc001cxk.3	chr1:55013806	+	chr1:55013606-55013982		0000
ACOT12	uc003khl.4	chr5:80689988	-	chr5:80689933-80690188		0000
ACOT13	uc010jpv.3	chr6:24667262	+	chr6:24667090-24667462		0000			G1/S									G1/S
ACOT2	uc001xon.4	chr14:74035771	+	chr14:74035571-74035944		0000
ACOT4	uc001xoo.3	chr14:74058409	+	chr14:74058209-74058609		0000
ACOT6	uc001xop.3	chr14:74083547	+	chr14:74083347-74083747		0000					TTTGAA_0.140_-_79
ACOT7	uc001ams.3	chr1:6445883	-	chr1:6445726-6446083		0000
ACOT8	uc002xqa.2	chr20:44486048	-	chr20:44485954-44486248	7.51	0100
ACOT9	uc004dao.3	chrX:23761407	-	chrX:23761261-23761607		0000
ACOX1	uc002jqf.3	chr17:73975515	-	chr17:73975315-73975715		0000
ACOX2	uc003dkl.3	chr3:58522929	-	chr3:58522729-58523129		0000
ACOX3	uc003glc.4	chr4:8442452	-	chr4:8442252-8442549		0000
ACOXL	uc010yxk.1	chr2:111490149	+	chr2:111489949-111490349		0000						TTCCGGC_0.990_+_192
ACP1	uc002qwg.3	chr2:264868	+	chr2:264668-264964		0000
ACP2	uc010rhi.1	chr11:47270457	-	chr11:47270415-47270657		0000						TTCCGGC_0.961_+_22
ACP5	uc010dye.1	chr19:11689801	-	chr19:11689601-11690001		0000
ACP6	uc001epr.2	chr1:147142634	-	chr1:147142434-147142834		0000
ACPL2	uc003etv.3	chr3:140950681	+	chr3:140950481-140950881		0000
ACPP	uc003eop.4	chr3:132036210	+	chr3:132036010-132036300		0000
ACPT	uc002pta.1	chr19:51293671	+	chr19:51293471-51293671		0000
ACR	uc010hbh.1	chr22:51176651	+	chr22:51176451-51176663		0000
ACRBP	uc010sfg.1	chr12:6756580	-	chr12:6756532-6756780		0000							TAACGG_0.945_-_-3
ACRC	uc004eae.2	chrX:70797873	+	chrX:70797673-70798073		0000
ACRV1	uc001qcs.3	chr11:125550793	-	chr11:125550675-125550993	6.85	0001					TAGGAA_0.263_-_104								TGTGAA_0.931_+_-27
ACSBG1	uc010umy.2	chr15:78527049	-	chr15:78526849-78527249		0000				TTTGAT_0.900_-_-52	TTTGAT_0.900_-_-52 TTTGAG_0.753_+_57 TTTAAA_0.737_+_-138			AAATA_0.999_+_70					TTTTAA_0.999_+_20 TTTCAA_0.999_-_-30 ATTGAA_0.999_+_-31 TTTGAT_0.900_-_-52 TTTGCA_0.971_+_-57 TTAGAA_0.994_-_64
ACSBG2	uc002meh.1	chr19:6135709	+	chr19:6135509-6135909		0000
ACSF2	uc010wmm.1	chr17:48503518	+	chr17:48503318-48503622		0000				TTTAAA_0.975_+_63	TTTAAA_0.975_+_63								TTTAAA_0.975_+_63 TTTAAA_0.975_-_63 TTTTAA_0.990_-_64	CCCCGG_0.255_+_52_CTTTAA_0.934_+_62
ACSF3	uc021tmq.1	chr16:89160216	+	chr16:89160016-89160416		0000
ACSL1	uc003iwu.1	chr4:185747215	-	chr4:185747015-185747415		0000						TTGCGCC_0.995_-_23		AAATA_0.998_+_65
ACSL3	uc002vni.3	chr2:223725731	+	chr2:223725531-223725931		0000			G2/M	TTCGAT_0.953_+_-91	TTCGAT_0.953_+_-91	TTGGCCC_1.000_-_-55						G2/M		CCGGCC_0.980_+_-101_ATCGAA_0.953_-_-91 CCGGCC_0.980_+_-101_TTCGAT_0.953_+_-91	CCGGCC_0.980_+_-101_ATCGAA_0.953_-_-91 CCGGCC_0.980_+_-101_TTCGAT_0.953_+_-91
ACSL4	uc010npp.1	chrX:108976621	-	chrX:108976421-108976821		0000			G2			TTCCGGG_0.973_+_65						G2
ACSL5	uc001kzu.3	chr10:114135955	+	chr10:114135755-114136067		0000							CAACTG_1.000_-_-18						TGTGAA_0.997_+_-14 TTAGAA_0.933_+_31
ACSL6	uc003kwb.3	chr5:131347355	-	chr5:131347246-131347555		0000								AAATA_0.999_+_-8						GGGCGG_0.732_+_-21_TTTTTA_0.999_-_-11
ACSM1	uc002dhm.1	chr16:20702578	-	chr16:20702510-20702778		0000
ACSM2A	uc010vax.1	chr16:20462858	+	chr16:20462658-20463058		0000
ACSM2B	uc002dhj.4	chr16:20587695	-	chr16:20587495-20587895		0000
ACSM3	uc002dhr.3	chr16:20775311	+	chr16:20775111-20775511		0000			M/G1							M/G1
ACSM4	uc001qsx.1	chr12:7456927	+	chr12:7456727-7456927		0000
ACSM5	uc002dhd.1	chr16:20420855	+	chr16:20420655-20421055		0000					CTTGAA_0.134_+_-189
ACSS1	uc002wub.3	chr20:25038818	-	chr20:25038738-25039018		0000
ACSS2	uc002xbd.2	chr20:33464327	+	chr20:33464127-33464448		0000					TAGGAA_0.387_+_107			AAACA_0.988_-_57
ACSS3	uc001szl.1	chr12:81471808	+	chr12:81471608-81471899		0000
ACTA1	uc001htm.3	chr1:229569843	-	chr1:229569643-229570043		0000							CAACTG_0.978_-_71	AAATA_1.000_+_-94						CCGCGG_0.499_+_-39_TATAAA_1.000_+_-29 CCGCGG_0.499_+_-39_TTTATA_1.000_-_-29 CGCGGG_0.622_+_-38_TTTTAT_1.000_-_-28
ACTA2	uc010qmz.1	chr10:90712580	-	chr10:90712380-90712780		0000								AAACA_1.000_-_-19 AAACA_0.987_-_-187
ACTB	uc003soq.4	chr7:5570232	-	chr7:5570032-5570432		0000						TTGGCCC_0.987_-_-95 TTCGCCG_1.000_-_-122								GCGGCG_0.574_+_-39_TTTTAT_1.000_-_-29 GGCGGC_0.412_+_-40_TATAAA_0.999_+_-30 GGCGGC_0.412_+_-40_TTTATA_0.999_-_-30
ACTBL2	uc003jrm.3	chr5:56778636	-	chr5:56778534-56778836		0000				TTTAAA_0.998_+_-35	TTTAAA_0.998_+_-35								TTTAAA_0.998_+_-35 TTTAAA_0.998_-_-35
ACTC1	uc001ziu.1	chr15:35087927	-	chr15:35087727-35088127		0000							CAACTG_1.000_+_120	AAATA_1.000_-_-58 AAATA_1.000_+_69						CCCCCG_1.000_+_107_TTGGAG_0.998_-_117 CCCCGG_0.999_+_108_GTTGGA_1.000_-_118	CCCCCG_1.000_+_107_TTGGAG_0.998_-_117 CCCCGG_0.999_+_108_GTTGGA_1.000_-_118
ACTG1	uc002kak.2	chr17:79479892	-	chr17:79479692-79480092		0000							TAACGG_0.987_+_40 CAACGG_0.961_-_-124	AAATA_0.966_+_37						GGCGGG_0.999_+_-131_TTGGGA_0.972_+_-121 TGCCCG_0.999_+_-50_TCGGAA_0.990_+_-40	GGCGGG_0.999_+_-131_TTGGGA_0.972_+_-121 TGCCCG_0.999_+_-50_TCGGAA_0.990_+_-40
ACTG2	uc010fex.1	chr2:74120092	+	chr2:74119892-74120292		0000				TTTAAA_1.000_+_-13 TTTGAA_1.000_-_-133	TTTAAA_1.000_+_-13 TTTGAA_1.000_-_-133	TTGGGGG_0.953_-_-95		AAACA_1.000_-_-15					TTTAAA_1.000_+_-13 TTTAAA_1.000_-_-13 TTTCAA_1.000_-_-79 ATTGAA_1.000_+_-80 TTTGAA_1.000_-_-133 TTTCAA_1.000_+_-134 TTTGCA_1.000_+_-146
ACTL6A	uc003fjy.3	chr3:179280707	+	chr3:179280507-179280880	7.04	0010					TTCGAT_0.640_+_-101
ACTL6B	uc003uvy.3	chr7:100254084	-	chr7:100253977-100254284		0000				TTTAAA_1.000_+_-84	TTTAAA_1.000_+_-84		CAACGG_0.927_-_-28						TTTAAA_1.000_+_-84 TTTAAA_1.000_-_-84	CGGCGG_0.253_+_-36_GTTGGA_0.967_+_-26 GGCGGC_0.215_+_-35_TTGGAG_0.985_+_-25
ACTL7A	uc004bdj.1	chr9:111624602	+	chr9:111624402-111624602		0000					CTTGAA_0.230_+_-52
ACTL7B	uc004bdi.3	chr9:111618275	-	chr9:111618210-111618475		0000
ACTL8	uc001bat.3	chr1:18081807	+	chr1:18081607-18082007		0000					TTTAAA_0.676_+_-83
ACTL9	uc002mkl.2	chr19:8809172	-	chr19:8809051-8809372		0000
ACTN1	uc001xkn.3	chr14:69446083	-	chr14:69445883-69446283		0000						TTCCCCC_0.985_-_-51 TTCCGCC_0.995_-_166 TTCCCCC_0.994_-_-171								TGGGGG_0.752_+_-53_TTTGGG_1.000_+_-43
ACTN2	uc001hyf.2	chr1:236849769	+	chr1:236849569-236849969		0000						TTCGCGC_0.995_-_86
ACTN3	uc021qma.1	chr11:66314390	+	chr11:66314190-66314590		0000				TTCGAT_1.000_+_-70	TTCGAT_1.000_+_-70			AAATA_1.000_-_-83
ACTN4	uc021uug.1	chr19:39138266	+	chr19:39138066-39138385	5.79	0010						TTGCCGC_0.999_-_-42
ACTR10	uc001xdf.3	chr14:58666832	+	chr14:58666632-58666935		0000
ACTR1A	uc010qqo.2	chr10:104262512	-	chr10:104262404-104262712		0000
ACTR1B	uc002syb.2	chr2:98280561	-	chr2:98280361-98280761		0000
ACTR2	uc010yqg.2	chr2:65454828	+	chr2:65454628-65455028	7.03	0001
ACTR3	uc010yyc.1	chr2:114647536	+	chr2:114647336-114647736		0000						TTCCCGG_0.997_+_9
ACTR3B	uc011kvp.1	chr7:152456850	+	chr7:152456650-152456967		0000
ACTR3BP2	uc010yuc.2	chr2:92129158	+	chr2:92128958-92129209		0000					TTTAAA_0.376_+_-45
ACTR3C	uc022aps.1	chr7:150020758	-	chr7:150020558-150020958		0000
ACTR5	uc002xjd.2	chr20:37377096	+	chr20:37376896-37377121		0000
ACTR6	uc001thb.1	chr12:100594573	+	chr12:100594373-100594629		0000						TTCCGGC_0.991_+_-82
ACTR8	uc003dhd.3	chr3:53916229	-	chr3:53916128-53916429		0000
ACTRT1	uc004eum.3	chrX:127186382	-	chrX:127186185-127186582		0000
ACTRT2	uc001ajz.3	chr1:2938045	+	chr1:2937845-2938245		0000
ACVR1	uc010fog.2	chr2:158732374	-	chr2:158732174-158732574		0000			M/G1			TTCCGGG_0.955_+_-65				M/G1				TCCCCC_0.999_+_179_TTTCAT_0.999_+_189	TCCCCC_0.999_+_179_TTTCAT_0.999_+_189
ACVR1B	uc010snn.2	chr12:52345450	+	chr12:52345250-52345527		0000						TTCGGGG_0.999_+_-99
ACVR1C	uc010fof.3	chr2:158485399	-	chr2:158485199-158485599		0000				TTTGAA_0.978_-_164	TTTGAA_0.978_-_164	TTCCCGG_0.999_-_156							TTTGAA_0.978_-_164	GCCCGG_0.960_+_154_TTCAAA_0.978_+_164 GGCCCG_0.922_+_153_CTTCAA_0.985_+_163	GCCCGG_0.960_+_154_TTCAAA_0.978_+_164 GGCCCG_0.922_+_153_CTTCAA_0.985_+_163
ACVR2A	uc002twh.3	chr2:148602569	+	chr2:148602369-148602721		0000				TTTAAA_1.000_+_-143	TTTAAA_1.000_+_-143	TTCCCCC_0.999_+_-71 TTCCCCG_0.999_+_133		AAACA_1.000_-_46 AAATA_0.988_-_-53 AAACA_1.000_-_-109					TTTAAA_1.000_+_-143 TTTAAA_1.000_-_-143 TTTGAC_1.000_+_-154
ACVR2B	uc003cif.3	chr3:38495789	+	chr3:38495589-38495813		0000						TTCCGCG_0.998_-_17 TTCCCGC_0.998_-_-77
ACVRL1	uc001rzk.3	chr12:52306112	+	chr12:52305912-52306216		0000						TTGGGGC_0.979_-_-10
ACY1	uc003dcp.3	chr3:52017299	+	chr3:52017099-52017499		0000
ACY3	uc001omq.3	chr11:67418130	-	chr11:67417930-67418330		0000
ACYP1	uc001xrg.3	chr14:75530736	-	chr14:75530536-75530936		0000			G1/S			TTCCGGG_0.983_+_-10			G1/S			S
ACYP2	uc002rxq.4	chr2:54342409	+	chr2:54342209-54342609		0000
ADA	uc002xmj.3	chr20:43280376	-	chr20:43280248-43280576		0000			G1/S								G1/S
ADAD1	uc003ieq.3	chr4:123300594	+	chr4:123300394-123300794		0000					TTTGAA_0.629_+_76		CAACGG_0.968_+_154
ADAD2	uc002fhr.2	chr16:84224722	+	chr16:84224522-84224836		0000
ADAL	uc001zrh.3	chr15:43622871	+	chr15:43622687-43623071	7.05	0010
ADAM10	uc010ugz.1	chr15:59042177	-	chr15:59041977-59042377		0000														TGCGCG_0.994_+_42_CCTGAA_0.989_+_52	TGCGCG_0.994_+_42_CCTGAA_0.989_+_52
ADAM11	uc010wjd.2	chr17:42836567	+	chr17:42836367-42836567		0000
ADAM12	uc010qul.1	chr10:128077127	-	chr10:128076927-128077327		0000						TTGGCCC_0.998_-_125	CAACGG_0.997_+_156
ADAM15	uc001fgr.1	chr1:155023761	+	chr1:155023561-155023862	7.02	0010
ADAM17	uc002qzu.3	chr2:9695917	-	chr2:9695734-9696117		0000						TTCCGGC_0.907_-_-36 TTCCGGC_0.968_+_-69 TTCCCGG_0.964_-_174
ADAM18	uc003xnh.3	chr8:39442086	+	chr8:39441886-39442141		0000
ADAM19	uc003lwz.3	chr5:157002783	-	chr5:157002704-157002983		0000
ADAM2	uc003xnj.3	chr8:39695779	-	chr8:39695704-39695979		0000					CTTGAA_0.210_-_66
ADAM20	uc001xme.3	chr14:71001732	-	chr14:71001532-71001932		0000					TTTGAG_0.374_+_-135
ADAM21	uc001xmd.3	chr14:70918873	+	chr14:70918673-70919073		0000
ADAM21P1	uc010ttg.2	chr14:70714518	-	chr14:70714318-70714718		0000
ADAM22	uc003ujm.3	chr7:87563565	+	chr7:87563365-87563765		0000						TTGGGCG_0.995_-_-12
ADAM23	uc002vbq.3	chr2:207308367	+	chr2:207308167-207308567		0000						TTGGCGG_0.952_+_-26
ADAM28	uc011kzz.2	chr8:24151579	+	chr8:24151379-24151662		0000					TTCGAG_0.266_+_-75	TTCCGCC_0.972_+_-110		AAACA_1.000_+_-50
ADAM29	uc011cki.2	chr4:175839508	+	chr4:175839308-175839708		0000					TTTAAA_0.159_+_125
ADAM30	uc001eij.3	chr1:120439147	-	chr1:120438959-120439347		0000
ADAM32	uc011lch.2	chr8:38965049	+	chr8:38964849-38965193		0000
ADAM33	uc010gbb.1	chr20:3662738	-	chr20:3662651-3662938		0000
ADAM3A	uc011lci.2	chr8:39380470	-	chr8:39380270-39380670		0000
ADAM6	uc001ysu.1	chr14:106438358	-	chr14:106438158-106438558		0000
ADAM7	uc003xeb.3	chr8:24298508	+	chr8:24298308-24298621		0000				TTTGAT_0.953_-_-2	TTTGAT_0.953_-_-2								TTTGAT_0.953_-_-2
ADAM8	uc021qbe.1	chr10:135090407	-	chr10:135090321-135090607		0000
ADAM9	uc003xmr.3	chr8:38854504	+	chr8:38854304-38854582		0000
ADAMDEC1	uc011lab.1	chr8:24241797	+	chr8:24241597-24241997		0000
ADAMTS1	uc002ymf.3	chr21:28217728	-	chr21:28217528-28217928		0000			G1/S						G1/S			G1/S
ADAMTS10	uc002mkk.1	chr19:8675588	-	chr19:8675388-8675788		0000						TTCCCCG_0.991_+_-58 TTGGGGG_0.999_+_-102 TTCCCGG_0.946_+_-183								CCGCGC_0.988_+_-113_TTTGGG_0.999_+_-103 TGGGGG_0.999_+_-101_TATAAA_0.996_-_-91 TGGGGG_0.999_+_-101_TTTATA_0.996_+_-91	CCGCGC_0.988_+_-113_TTTGGG_0.999_+_-103 TGGGGG_0.999_+_-101_TATAAA_0.996_-_-91 TGGGGG_0.999_+_-101_TTTATA_0.996_+_-91
ADAMTS12	uc010iuq.1	chr5:33892124	-	chr5:33891961-33892324		0000
ADAMTS13	uc004cdx.4	chr9:136287119	+	chr9:136286919-136287319		0000
ADAMTS14	uc001jrh.3	chr10:72432558	+	chr10:72432358-72432558		0000
ADAMTS15	uc010scd.2	chr11:130318868	+	chr11:130318668-130318868		0000				TAGGAA_1.000_+_-194	TAGGAA_1.000_+_-194
ADAMTS16	uc003jdl.3	chr5:5140442	+	chr5:5140242-5140580		0000
ADAMTS17	uc002bvv.1	chr15:100882183	-	chr15:100882104-100882383		0000
ADAMTS18	uc002ffc.4	chr16:77469011	-	chr16:77468811-77469211		0000														CGCCCC_0.593_+_-88_TCTGAG_0.908_-_-78
ADAMTS19	uc003kvb.1	chr5:128796102	+	chr5:128795902-128796102		0000														TCCCCC_0.462_+_-150_TTTGTC_0.978_-_-140
ADAMTS2	uc011dgm.2	chr5:178772431	-	chr5:178772329-178772631		0000						TTCCCCG_0.991_-_46 TTCGCGC_1.000_+_55 TTGGCGC_0.996_-_-189
ADAMTS20	uc010skx.2	chr12:43945724	-	chr12:43945724-43945924		0000
ADAMTS3	uc003hgk.2	chr4:73434516	-	chr4:73434479-73434716		0000			G1/S		TTTGAG_0.431_-_-130			AAATA_0.998_-_-39				G1/S	TTGGAA_0.995_+_13
ADAMTS4	uc001fyt.4	chr1:161168845	-	chr1:161168645-161169045		0000													TTTTAA_0.999_-_-28
ADAMTS5	uc002ymg.3	chr21:28339439	-	chr21:28339239-28339639		0000			G2			TTCCCCC_1.000_-_-77				G2			TGTGAA_1.000_-_28 TTTCAA_1.000_-_-33 GTTGAA_1.000_+_-34
ADAMTS6	uc003jtp.3	chr5:64777704	-	chr5:64777504-64777904		0000				CTTGAA_1.000_-_6 TTTGAT_1.000_+_103	CTTGAA_1.000_-_6 TTTGAT_1.000_+_103	TTGGGGG_1.000_-_175		AAATA_1.000_-_122					CTTGAA_1.000_-_6 GTTGAA_1.000_-_46 TTTGAT_1.000_+_103 TTTGCA_1.000_+_124 TCTGAA_1.000_+_-162 TGTGAA_0.997_-_-198
ADAMTS7	uc002bek.1	chr15:79103773	-	chr15:79103573-79103973		0000
ADAMTS8	uc001qgg.4	chr11:130298539	-	chr11:130298339-130298739		0000				TTTGAT_1.000_-_-34	TTTGAT_1.000_-_-34	TTCCCGG_0.998_-_-8		AAATA_1.000_+_7 AAATA_1.000_+_-29					TTTGAT_1.000_-_-34 TTTGCA_0.999_+_-130
ADAMTS9	uc011bfo.2	chr3:64673365	-	chr3:64673333-64673565		0000						TTGGCGG_1.000_+_-88							TTTGAC_1.000_-_-96
ADAMTSL1	uc003zne.4	chr9:18474078	+	chr9:18473878-18474230		0000						TTCCGGC_1.000_+_134	TAACGG_0.996_-_-120							TCCGGC_1.000_+_135_TTGGAT_1.000_-_145	TCCGGC_1.000_+_135_TTGGAT_1.000_-_145
ADAMTSL2	uc004cei.3	chr9:136399974	+	chr9:136399774-136400174		0000				TTTGAA_1.000_+_-105	TTTGAA_1.000_+_-105								TTTGAA_1.000_+_-105
ADAMTSL3	uc002bjy.1	chr15:84322837	+	chr15:84322637-84323037		0000			S-phase			TTCGCGG_0.990_+_17 TTCCCCG_0.928_-_65 TTGCCGG_0.993_+_-104						S
ADAMTSL4	uc001euw.3	chr1:150521897	+	chr1:150521697-150522097		0000							TAACGG_0.986_+_50
ADAMTSL5	uc010xgq.1	chr19:1513188	-	chr19:1512988-1513388		0000						TTCCGGG_0.998_-_-123 TTCCCGG_0.997_+_-145 TTGGGCC_0.953_+_151
ADAP1	uc003sjo.4	chr7:994306	-	chr7:994113-994506		0000
ADAP2	uc002hfx.3	chr17:29248753	+	chr17:29248553-29248953		0000
ADAR	uc001ffn.2	chr1:154580724	-	chr1:154580524-154580924		0000
ADARB1	uc002zgy.2	chr21:46494492	+	chr21:46494292-46494692		0000
ADARB2	uc009xhq.3	chr10:1779670	-	chr10:1779470-1779870		0000				TTTGAA_1.000_-_-52	TTTGAA_1.000_-_-52	TTGCGCC_0.994_-_-20	CAACTG_0.958_-_-116	AAACA_0.999_+_-34 AAATA_1.000_+_-80					TTTGAA_1.000_-_-52 TTTGCA_0.999_+_-175
ADAT1	uc002feo.2	chr16:75657221	-	chr16:75657021-75657421		0000			S-phase									S
ADAT2	uc003qjj.3	chr6:143771841	-	chr6:143771795-143772041	7.9	1011						TTGCCGC_0.975_-_-177
ADAT3;SCAMP4	uc002luj.3	chr19:1905372	+	chr19:1905172-1905572		0000														CCGGGC_0.157_+_12_TTAGCA_0.960_-_22
ADC	uc009vue.3	chr1:33546713	+	chr1:33546513-33546913		0000			G1/S			TTCCCCG_0.970_-_96 TTCGGCC_1.000_-_155						G1/S	TTTTAA_1.000_+_176
ADCK1	uc001xui.3	chr14:78266425	+	chr14:78266225-78266625		0000
ADCK2	uc003vvy.1	chr7:140372952	+	chr7:140372752-140373130		0000			G1/S						G1/S			G1/S|S
ADCK3	uc010pvp.1	chr1:227127937	+	chr1:227127737-227128137		0000			G1/S					AAACA_1.000_+_58				G1/S
ADCK4	uc002oos.2	chr19:41222790	-	chr19:41222590-41222990		0000						TTCGGGG_0.988_-_-88 TTCCGGC_0.989_+_-158
ADCK5	uc003zch.3	chr8:145597730	+	chr8:145597530-145597784		0000
ADCY1	uc003tne.4	chr7:45614124	+	chr7:45613924-45614142		0000			S-phase									S
ADCY10	uc010plj.2	chr1:167883453	-	chr1:167883253-167883653	6.36	0100													TCTGAA_0.980_-_136
ADCY2	uc003jdz.1	chr5:7396342	+	chr5:7396142-7396409		0000
ADCY3	uc002rfs.4	chr2:25142055	-	chr2:25141856-25142255		0000
ADCY4	uc010toh.2	chr14:24804277	-	chr14:24804077-24804477		0000
ADCY5	uc003egh.2	chr3:123167392	-	chr3:123167392-123167592		0000						TTCCGGG_0.938_+_-42								CCGCCC_0.972_+_-73_CTTGGA_1.000_+_-63 GCCCCC_0.991_+_-116_TGTGAC_0.998_+_-106	CCGCCC_0.972_+_-73_CTTGGA_1.000_+_-63 GCCCCC_0.991_+_-116_TGTGAC_0.998_+_-106
ADCY6	uc001rsh.4	chr12:49177877	-	chr12:49177677-49178077		0000			G1/S		CTTGAA_0.131_-_90				G1/S			G1/S
ADCY7	uc002egd.1	chr16:50321822	+	chr16:50321622-50322022		0000
ADCY8	uc003ytd.4	chr8:132052835	-	chr8:132052635-132053035		0000						TTGGCGC_0.999_-_-110
ADCY9	uc002cvx.3	chr16:4166186	-	chr16:4165986-4166386		0000
ADCYAP1	uc010dkh.3	chr18:905296	+	chr18:905096-905387		0000
ADCYAP1R1	uc003tcg.3	chr7:31092075	+	chr7:31091875-31092275		0000
ADD1	uc003gfo.3	chr4:2845583	+	chr4:2845383-2845783		0000
ADD2	uc021vjc.1	chr2:70994847	-	chr2:70994647-70995017		0000
ADD3	uc001kyv.3	chr10:111767710	+	chr10:111767510-111767910		0000							TAACGG_0.958_+_53
ADH1A	uc003hur.2	chr4:100212185	-	chr4:100212071-100212385		0000
ADH1B	uc011ceh.2	chr4:100242572	-	chr4:100242488-100242772		0000
ADH4	uc003hun.3	chr4:100065449	-	chr4:100065373-100065649		0000			G2/M		TTTGAA_0.183_-_-24 TTTGTA_0.204_-_-121			AAATA_0.961_-_-30	G2/M
ADH5	uc003hui.3	chr4:100009931	-	chr4:100009851-100010131		0000
ADH6	uc011cef.1	chr4:100140403	-	chr4:100140309-100140603		0000
ADH7	uc021xqj.1	chr4:100356291	-	chr4:100356261-100356372		0000
ADHFE1	uc003xwc.4	chr8:67344717	+	chr8:67344517-67344751		0000
ADI1	uc002qxp.4	chr2:3523350	-	chr2:3523258-3523550		0000
ADIG	uc002xjb.1	chr20:37209837	+	chr20:37209637-37209893		0000
ADIPOQ	uc003fra.3	chr3:186560462	+	chr3:186560262-186560662		0000
ADIPOR1	uc001gyr.4	chr1:202927485	-	chr1:202927285-202927685		0000						TTCCGGC_1.000_+_58
ADIPOR2	uc001qjm.3	chr12:1800246	+	chr12:1800046-1800446		0000
ADK	uc010qlb.2	chr10:75910942	+	chr10:75910742-75911036		0000
ADM	uc001mil.1	chr11:10326641	+	chr11:10326441-10326841		0000			S-phase							S-phase
ADM2	uc003blj.3	chr22:50919984	+	chr22:50919784-50920184		0000
ADNP	uc002xvu.1	chr20:49547527	-	chr20:49547327-49547727		0000														CCGCCC_0.993_+_-86_TTTGTC_0.997_+_-76 CGCCCG_0.999_+_-134_GGTGAA_0.998_+_-124	CCGCCC_0.993_+_-86_TTTGTC_0.997_+_-76 CGCCCG_0.999_+_-134_GGTGAA_0.998_+_-124
ADNP2	uc002lnw.3	chr18:77866914	+	chr18:77866714-77867114		0000					TTTGAG_0.496_-_-10								TTTGCA_1.000_-_-102
ADO	uc001jmg.3	chr10:64564515	+	chr10:64564315-64564715		0000
ADORA1	uc001gze.1	chr1:203096835	+	chr1:203096635-203097035		0000
ADORA1	uc010pqh.1	chr1:203097405	+	chr1:203097205-203097442		0000				CTTGAA_0.997_+_-7 TTTAAA_1.000_+_-51	CTTGAA_0.997_+_-7 TTTAAA_1.000_+_-51								TTTCAA_0.997_-_-6 CTTGAA_0.997_+_-7 TTTTAA_0.998_-_-50 TTTAAA_1.000_+_-51 TTTAAA_1.000_-_-51
ADORA2A	uc002zzy.4	chr22:24823529	+	chr22:24823329-24823729		0000					CTTGAA_0.118_-_-161
ADORA2A	uc011ajs.2	chr22:24823536	+	chr22:24823336-24823736		0000					CTTGAA_0.118_-_-168
ADORA2B	uc002gpd.1	chr17:15848230	+	chr17:15848030-15848430		0000			G2									G2
ADORA3	uc001ebh.4	chr1:112046743	-	chr1:112046543-112046943		0000
ADPGK	uc002avh.4	chr15:73076126	-	chr15:73076032-73076127		0000						TTCCGGG_0.997_-_32
ADPRH	uc010hqv.3	chr3:119298522	+	chr3:119298322-119298722		0000
ADPRHL1	uc001vtq.1	chr13:114107839	-	chr13:114107752-114108039		0000
ADPRHL2	uc001bzt.3	chr1:36554452	+	chr1:36554252-36554505		0000
ADRA1A	uc010lul.1	chr8:26722922	-	chr8:26722722-26723122		0000					TTTGAG_0.597_+_-57
ADRA1B	uc003lxt.1	chr5:159343739	+	chr5:159343539-159343912		0000														TCCCCC_0.990_+_144_TATGGA_1.000_+_154	TCCCCC_0.990_+_144_TATGGA_1.000_+_154
ADRA1D	uc002wkr.2	chr20:4229659	-	chr20:4229604-4229859		0000
ADRA2A	uc001kzo.3	chr10:112836789	+	chr10:112836589-112836989		0000
ADRA2B	uc021vlh.1	chr2:96781888	-	chr2:96781888-96782088		0000
ADRA2C	uc003ghm.3	chr4:3768295	+	chr4:3768095-3768333		0000
ADRB1	uc001lba.3	chr10:115803805	+	chr10:115803605-115803891		0000								AAACA_1.000_+_-178						CCCGGC_0.574_+_-192_TCAGAA_1.000_+_-182 CCGGCG_0.988_+_-163_CTGGAA_0.951_-_-153 GCCCGG_0.487_+_-193_TCTGAG_1.000_-_-183	CCGGCG_0.988_+_-163_CTGGAA_0.951_-_-153
ADRB2	uc003lpr.2	chr5:148206155	+	chr5:148205955-148206355		0000			S-phase				TAACGG_1.000_+_6			S-phase		G2
ADRB3	uc003xkr.2	chr8:37824184	-	chr8:37823987-37824384		0000
ADRBK1	uc009yrn.1	chr11:67033904	+	chr11:67033704-67034104		0000														CGGCGC_0.986_+_96_TGTGAG_0.965_+_106	CGGCGC_0.986_+_96_TGTGAG_0.965_+_106
ADRBK2	uc003abx.4	chr22:25960860	+	chr22:25960660-25961007		0000						TTGGCGG_0.993_-_130								CGCCGC_0.971_+_122_TTTGGC_0.991_-_132	CGCCGC_0.971_+_122_TTTGGC_0.991_-_132
ADRM1	uc002yco.3	chr20:60878026	+	chr20:60877826-60878226		0000					TTCGAG_0.111_-_54	TTCCGGC_0.990_+_0 TTCCGCC_0.964_+_-159
ADSL	uc003ayp.4	chr22:40742503	+	chr22:40742303-40742562		0000
ADSS	uc001iaj.3	chr1:244615436	-	chr1:244615236-244615636	8.6	1111				TTTGTA_0.952_+_-136	TTCGAG_0.192_-_-43 TTTGAA_0.106_+_-94 TTTGTA_0.952_+_-136								TTTGTA_0.952_+_-136
ADSSL1	uc001ype.3	chr14:105196227	+	chr14:105196027-105196229		0000
AEBP1	uc003tkb.3	chr7:44143959	+	chr7:44143759-44144159		0000
AEBP2	uc001ref.2	chr12:19592607	+	chr12:19592407-19592633		0000						TTGGGCG_0.998_+_-63								TCGGCG_0.997_+_-74_TTTGGG_0.998_+_-64	TCGGCG_0.997_+_-74_TTTGGG_0.998_+_-64
AEN	uc002bmt.2	chr15:89164526	+	chr15:89164326-89164726	15.13	1011			M/G1							M/G1
AES	uc002lxb.1	chr19:3062964	-	chr19:3062925-3063164		0000
AF035281	uc003wfu.3	chr7:148991289	+	chr7:148991089-148991356		0000
AFAP1	uc011bwk.1	chr4:7941653	-	chr4:7941453-7941853		0000			M/G1						M/G1	M/G1
AFAP1L1	uc003lqg.4	chr5:148651400	+	chr5:148651200-148651531		0000			G2/M			TTCCGGG_0.996_+_-63						G2/M
AFAP1L2	uc001lbp.3	chr10:116164515	-	chr10:116164315-116164715		0000
AFF1	uc011ccz.2	chr4:87856153	+	chr4:87855953-87856353		0000			G1/S									G1/S
AFF2	uc011mxb.2	chrX:147582138	+	chrX:147581938-147582338		0000														CGCCGC_0.998_+_-2_TGTGCA_0.999_+_8	CGCCGC_0.998_+_-2_TGTGCA_0.999_+_8
AFF3	uc002taf.3	chr2:100722045	-	chr2:100722045-100722133		0000
AFF4	uc003kyd.3	chr5:132299354	-	chr5:132299154-132299554		0000
AFG3L1P	uc002fpz.1	chr16:90044085	+	chr16:90043885-90044285	6.12	0100			S-phase		TTTGAA_0.143_-_109							S
AFG3L2	uc002kqz.2	chr18:12377275	-	chr18:12377081-12377475		0000
AFM	uc003hhb.3	chr4:74347461	+	chr4:74347261-74347492		0000					TTTGTA_0.175_-_25
AFMID	uc002jvb.3	chr17:76183397	+	chr17:76183197-76183451	16.1975	1111
AFP	uc003hgz.1	chr4:74301932	+	chr4:74301732-74301979		0000				TTTGTA_0.916_-_-145 CTTGAA_1.000_+_-158	TTTGTA_0.916_-_-145 CTTGAA_1.000_+_-158			AAATA_0.938_+_-142 AAATA_0.953_+_-148					TTTGTA_0.916_-_-145 CTTGAA_1.000_+_-158
AFTPH	uc002sdb.3	chr2:64751438	+	chr2:64751238-64751638		0000						TTCCGGG_1.000_-_-11 TTCCCCC_0.998_+_17 TTCCGCC_1.000_-_95 TTGCCCG_0.940_+_-154								CCGCGG_1.000_+_130_GGTGAA_1.000_+_140 CGCGGC_1.000_+_131_TTTCAC_1.000_-_141	CCGCGG_1.000_+_130_GGTGAA_1.000_+_140 CGCGGC_1.000_+_131_TTTCAC_1.000_-_141
AGA	uc003iuw.3	chr4:178363657	-	chr4:178363529-178363857	6.55	1010
AGAP1	uc021vyp.1	chr2:236402732	+	chr2:236402532-236402932		0000			M/G1			TTGCCGC_0.912_-_-123 TTCCCCG_1.000_+_-183 TTGCGCC_1.000_-_-190				M/G1				TCCGGC_0.990_+_-173_TGGGAA_0.998_+_-163	TCCGGC_0.990_+_-173_TGGGAA_0.998_+_-163
AGAP2	uc001spq.3	chr12:58132029	-	chr12:58132029-58132229		0000						TTGCGCC_1.000_-_-167								GGGCGC_1.000_+_-191_TGTGAT_0.999_+_-181	GGGCGC_1.000_+_-191_TGTGAT_0.999_+_-181
AGAP3	uc003wjf.1	chr7:150783825	+	chr7:150783625-150783828		0000
AGAP4	uc001jcx.4	chr10:46342921	-	chr10:46342795-46343121	7.135	1010							CAACTG_0.996_-_-182	AAATA_0.997_+_-139					TGTGAA_1.000_-_-152
AGAP5	uc009xri.3	chr10:75457554	-	chr10:75457513-75457754		0000
AGAP6	uc001jix.4	chr10:51748077	+	chr10:51747877-51748277		0000							CAACTG_0.995_-_104	AAATA_0.998_+_147					TGTGAA_0.997_-_134
AGAP7	uc001jio.3	chr10:51486327	-	chr10:51486201-51486527	6.49	1000							CAACTG_0.966_-_-170	AAATA_0.947_+_-127					TGTGAA_0.942_-_-140
AGAP8	uc009xnv.2	chr10:48906921	-	chr10:48906721-48907121		0000
AGAP8	uc021pqg.1	chr10:51246535	-	chr10:51246409-51246735		0000							CAACTG_0.996_-_-182	AAATA_0.999_+_-139					TGTGAA_1.000_-_-152
AGAP9	uc009xnf.2	chr10:47213626	-	chr10:47213514-47213826	7.09	1000								AAATA_1.000_+_-153					TGTGAA_0.991_-_-166
AGBL1	uc002blz.1	chr15:86685241	+	chr15:86685041-86685441		0000
AGBL2	uc001ngg.3	chr11:47736928	-	chr11:47736728-47737128		0000
AGBL3	uc011kpw.2	chr7:134671258	+	chr7:134671058-134671458		0000
AGBL4	uc001cru.2	chr1:50489626	-	chr1:50489468-50489826		0000
AGBL5	uc002rid.3	chr2:27274490	+	chr2:27274290-27274690		0000						TTGGGGG_0.999_+_82 TTGGGCC_1.000_-_114	TAACGG_0.977_-_-149	AAACA_1.000_-_35 AAACA_1.000_-_77
AGER	uc021yvp.1	chr6:32152099	-	chr6:32152092-32152299		0000				TAGGAA_1.000_-_-28	TAGGAA_1.000_-_-28
AGFG1	uc002vpc.2	chr2:228336887	+	chr2:228336687-228337087		0000			G2/M									G2/M
AGFG2	uc003uvf.3	chr7:100136833	+	chr7:100136633-100136969	10.06	1011						TTCCCGC_1.000_-_76							GTTGAA_0.998_+_93
AGGF1	uc003ket.3	chr5:76326209	+	chr5:76326009-76326409		0000			G1/S									G1/S
AGK	uc003vwi.2	chr7:141251077	+	chr7:141250877-141251277		0000
AGL	uc001dsi.1	chr1:100315639	+	chr1:100315439-100315839		0000														CGCCCC_0.948_+_160_TTTGCC_0.965_+_170	CGCCCC_0.948_+_160_TTTGCC_0.965_+_170
AGMAT	uc001awv.2	chr1:15911605	-	chr1:15911462-15911805		0000					TTTGAG_0.495_+_23
AGMO	uc003stb.1	chr7:15601640	-	chr7:15601470-15601840		0000				CTTGAA_0.991_-_116	CTTGAA_0.991_-_116								CTTGAA_0.991_-_116
AGPAT1	uc003oae.3	chr6:32143916	-	chr6:32143716-32144116		0000				TAGGAA_0.952_-_134	TAGGAA_0.952_-_134	TTCCGGG_0.996_-_13 TTGGGCC_1.000_-_148								CCCCCC_0.861_+_124_TAGGAA_0.952_-_134
AGPAT2	uc004cii.1	chr9:139581911	-	chr9:139581809-139582111		0000
AGPAT3	uc002zdv.3	chr21:45285115	+	chr21:45284915-45285315		0000			M/G1			TTCCGCC_1.000_-_-115			M/G1
AGPAT4	uc011egd.1	chr6:161695107	-	chr6:161694907-161695307		0000				TTTAAA_0.999_+_-84	TTTAAA_0.999_+_-84								TTTTAA_1.000_-_-83 TTTAAA_0.999_+_-84 TTTAAA_0.999_-_-84
AGPAT5	uc003wqo.3	chr8:6565877	+	chr8:6565677-6566077		0000
AGPAT6	uc003xnz.2	chr8:41435706	+	chr8:41435506-41435906		0000														GGGCGG_0.576_+_-26_TTTGTC_1.000_-_-16
AGPAT9	uc003hoy.3	chr4:84457656	+	chr4:84457456-84457775		0000
AGPHD1	uc002bdt.3	chr15:78799905	+	chr15:78799705-78800105		0000
AGPS	uc002ull.2	chr2:178257470	+	chr2:178257270-178257517		0000					TTCGAG_0.133_-_-180	TTCCGGG_0.989_+_20 TTGGCGG_0.977_-_-72								CGGGCG_0.999_+_-20_TCTGAG_0.998_+_-10	CGGGCG_0.999_+_-20_TCTGAG_0.998_+_-10
AGR2	uc003str.3	chr7:16844738	-	chr7:16844538-16844938		0000				TTTGAA_0.999_-_-150 TTTGAT_0.993_-_-164	TTTGAT_0.993_-_-164 TTTGAA_0.999_-_-150			AAATA_1.000_+_88					TTTGAA_0.999_-_-150 TTTGAT_0.993_-_-164
AGR3	uc003sts.3	chr7:16921613	-	chr7:16921413-16921813		0000								AAACA_0.952_+_1					TTTTAA_0.926_+_-9 TCTGAA_0.978_-_-121
AGRN	uc001ack.2	chr1:955502	+	chr1:955302-955552		0000
AGRP	uc002etg.1	chr16:67517716	-	chr16:67517516-67517916		0000													TTGGAA_0.999_+_-120	GGGGCC_0.994_+_-70_ATTAAA_1.000_+_-60 GGGGCC_0.994_+_-70_TTTAAT_1.000_-_-60	GGGGCC_0.994_+_-70_ATTAAA_1.000_+_-60 GGGGCC_0.994_+_-70_TTTAAT_1.000_-_-60
AGT	uc009xff.3	chr1:230850336	-	chr1:230850136-230850536		0000
AGTPBP1	uc010mqc.3	chr9:88356944	-	chr9:88356877-88357144		0000						TTGCCCG_1.000_+_57
AGTR1	uc003ewg.3	chr3:148415657	+	chr3:148415457-148415857		0000														CGCCCC_0.993_+_-7_TATAAA_0.934_+_3 CGCCCC_0.993_+_-7_TTTATA_0.934_-_3	CGCCCC_0.993_+_-7_TATAAA_0.934_+_3 CGCCCC_0.993_+_-7_TTTATA_0.934_-_3
AGTR2	uc004eqh.4	chrX:115301957	+	chrX:115301757-115302157		0000				TTTGAA_0.951_-_82 TTTGAA_0.986_+_106 TTTGAA_1.000_+_-134 TTTGAG_1.000_+_-145	TTTGAG_1.000_+_-145 TTTGAA_0.889_-_-188 TTTGAA_0.951_-_82 TTTGAA_0.986_+_106 TTTGAA_1.000_+_-134			AAACA_0.987_+_9 AAACA_1.000_-_-88 AAATA_1.000_-_-136 AAACA_0.999_-_-147					GTTGAA_1.000_+_-16 TATGAA_1.000_-_-44 TTTGAA_0.951_-_82 TTTGCA_1.000_+_-85 TCTGAA_1.000_-_-98 TTTGAA_0.986_+_106 TATGAA_0.998_+_118 TTTGAA_1.000_+_-134 TTTGAG_1.000_+_-145
AGTRAP	uc001asv.3	chr1:11796141	+	chr1:11795941-11796265		0000
AGXT	uc010zoi.1	chr2:241808161	+	chr2:241807961-241808282		0000
AGXT2	uc003jjf.3	chr5:35048240	-	chr5:35048040-35048440		0000					TTTGAG_0.816_-_160
AGXT2L1	uc011cfo.2	chr4:109684235	-	chr4:109684054-109684435		0000													TTTTAA_0.990_-_-3
AGXT2L2	uc003mjb.3	chr5:177659803	-	chr5:177659603-177660003		0000			S-phase									S
AHCTF1	uc001ibv.2	chr1:247094726	-	chr1:247094629-247094926	11.1667	1011
AHCY	uc010get.2	chr20:32891215	-	chr20:32891076-32891415		0000				TTTAAA_0.996_+_25	TTTAAA_0.996_+_25			AAATA_0.901_-_23					TTTAAA_0.996_+_25 TTTAAA_0.996_-_25
AHCYL1	uc001dyx.3	chr1:110527386	+	chr1:110527186-110527586		0000								AAACA_0.974_-_13
AHCYL2	uc003vot.3	chr7:128864854	+	chr7:128864654-128864917		0000														TGCGGC_0.041_+_-172_TTTGCT_0.998_-_-162
AHDC1	uc009vsz.1	chr1:27930143	-	chr1:27929943-27930343		0000						TTGGGGG_0.999_+_-88 TTCCGGC_0.994_-_164 TTGGGGG_0.981_-_180		AAATA_0.999_+_-200						CGGCGG_1.000_+_53_TGTGAG_1.000_+_63	CGGCGG_1.000_+_53_TGTGAG_1.000_+_63
AHI1	uc003qgi.3	chr6:135818903	-	chr6:135818703-135818938		0000			G2/M						G2/M		G1/S	G1/S
AHNAK	uc001ntk.1	chr11:62314332	-	chr11:62314132-62314532		0000						TTCCGGG_0.971_-_108 TTGGGCC_0.976_+_153
AHNAK2	uc010axc.1	chr14:105444694	-	chr14:105444574-105444894		0000			G1/S							G1/S
AHR	uc011jxz.1	chr7:17338275	+	chr7:17338075-17338475		0000			G2		TAGGAA_0.764_+_154					G2
AHRR	uc003jav.3	chr5:304291	+	chr5:304091-304291		0000
AHSA1	uc001xtw.3	chr14:77924372	+	chr14:77924172-77924532		0000						TTCCGGC_1.000_-_-2 TTGCGGC_0.999_+_50
AHSA2	uc002sbc.2	chr2:61404554	+	chr2:61404354-61404754		0000							CAACTG_1.000_+_188
AHSG	uc003fqj.3	chr3:186330849	+	chr3:186330649-186330930		0000				TTTGAA_0.981_+_-90	TTTGAA_0.981_+_-90			AAACA_0.996_-_-116 AAACA_1.000_-_-137					TTTGAA_0.981_+_-90 TTTGCA_0.991_+_-114
AHSP	uc002ecj.3	chr16:31539202	+	chr16:31539002-31539402		0000
AICDA	uc001qur.2	chr12:8765442	-	chr12:8765363-8765642		0000				TTTGAA_0.999_+_-39	TTTGAA_0.999_+_-39 TTTGAG_0.513_-_-45								TTTGAA_0.999_+_-39
AIDA	uc001hnn.3	chr1:222885864	-	chr1:222885664-222886064		0000						TTGCGGC_0.985_-_26 TTGCCGC_1.000_-_45 TTGGGCG_0.999_+_58
AIF1	uc003nuy.3	chr6:31583032	+	chr6:31582832-31583106		0000
AIF1L	uc004cad.2	chr9:133971862	+	chr9:133971662-133972016		0000				TTTGAA_0.912_+_-110	TTTGAA_0.912_+_-110								TTTGAA_0.912_+_-110
AIFM1	uc004evi.3	chrX:129299861	-	chrX:129299661-129300061	6.91667	1011								AAACA_0.988_-_164					TTTGAC_0.999_+_166
AIFM2	uc021psi.1	chr10:71892690	-	chr10:71892490-71892890		0000			G2/M									G2/M
AIG1	uc011edw.1	chr6:143382022	+	chr6:143381822-143382062		0000
AIM1	uc003prh.3	chr6:106959304	+	chr6:106959104-106959504	9.11	1011								AAATA_0.915_-_-9
AIM1L	uc001bmd.4	chr1:26680621	-	chr1:26680421-26680821		0000						TTGGGCC_1.000_-_-114
AIM2	uc001ftj.1	chr1:159046647	-	chr1:159046447-159046847		0000
AIMP1	uc003hyh.3	chr4:107237663	+	chr4:107237463-107237704		0000			M/G1									M/G1
AIMP2	uc003spo.3	chr7:6048881	+	chr7:6048681-6048994		0000		1
AIP	uc001olv.3	chr11:67250504	+	chr11:67250304-67250629		0000						TTCCCCG_1.000_-_114								TGGCGC_0.837_+_21_TCGGAA_0.960_+_31
AIPL1	uc002gcq.3	chr17:6338519	-	chr17:6338424-6338719		0000
AIRE	uc002zei.2	chr21:45705762	+	chr21:45705562-45705889		0000
AJAP1	uc001aln.3	chr1:4715104	+	chr1:4714904-4715304		0000						TTCCGGC_0.912_-_58 TTGGGGC_0.992_-_176	CAACGG_0.984_+_180
AJUBA	uc001whz.3	chr14:23451848	-	chr14:23451648-23452048		0000					TAGGAA_0.659_+_-13
AK074396	uc004bzl.3	chr9:133305668	+	chr9:133305468-133305868		0000
AK094715	uc003pta.1	chr6:109557816	+	chr6:109557616-109557863		0000					TTTGTA_0.334_-_-7
AK097143	uc003qit.1	chr6:142351554	-	chr6:142351354-142351754		0000					TTTGAG_0.197_+_-114
AK098727	uc003aup.3	chr22:38381941	+	chr22:38381741-38382141		0000				TTTGAT_1.000_+_-9 CTTGAA_1.000_+_132 TTCGAA_1.000_+_155	TTTGAT_1.000_+_-9 CTTGAA_1.000_+_132 TTCGAA_1.000_+_155	TTCGGGG_1.000_+_124 TTGGGGG_1.000_+_-142		AAACA_1.000_+_136 AAATA_1.000_+_159					TTTGAT_1.000_+_-9 CTTGAA_1.000_+_132 TTTCAA_1.000_-_133 TTCGAA_1.000_+_155 TTCGAA_1.000_-_155	CCCCCG_1.000_+_62_TTGGCA_1.000_-_72	CCCCCG_1.000_+_62_TTGGCA_1.000_-_72
AK1	uc004bsm.4	chr9:130640022	-	chr9:130639822-130640222		0000								AAATA_1.000_+_41
AK127270	uc001cyi.1	chr1:56046709	+	chr1:56046509-56046909		0000					TTTGAA_0.403_-_45		CAACTG_0.960_+_33
AK127846	uc002qao.3	chr19:53510764	+	chr19:53510564-53510964		0000					TTTGAG_0.129_+_-158
AK128777	uc002chs.1	chr16:679238	+	chr16:679038-679438		0000				TTTGTA_0.991_+_0	TTTGTA_0.991_+_0								TTTGTA_0.991_+_0
AK2	uc001bwo.2	chr1:33502512	-	chr1:33502429-33502712	6.45	0010					TTTGAT_0.322_-_-124
AK296966	uc011bgq.1	chr3:97540883	+	chr3:97540683-97541050		0000
AK3	uc011lma.2	chr9:4741309	-	chr9:4741109-4741509		0000						TTCCGGG_1.000_+_83
AK300121	uc010snr.1	chr12:52652171	-	chr12:52651971-52652371		0000
AK300656	uc004amx.3	chr9:86323235	+	chr9:86323035-86323435	6.93	1010
AK302514	uc011dxv.2	chr6:66011353	+	chr6:66011153-66011553		0000					TTTGAG_0.601_-_152
AK302694	uc010qdx.1	chr10:30981202	+	chr10:30981002-30981402		0000
AK310228	uc002dey.2	chr16:16464996	+	chr16:16464796-16465196		0000
AK310228	uc010bvu.2	chr16:18434624	-	chr16:18434424-18434824		0000
AK4	uc001dby.3	chr1:65613231	+	chr1:65613031-65613431		0000
AK5	uc001dhn.3	chr1:77747661	+	chr1:77747461-77747861		0000
AK7	uc001yfm.1	chr14:96858447	+	chr14:96858247-96858491		0000
AK8	uc004cbv.1	chr9:135754198	-	chr9:135753998-135754398		0000
AKAP1	uc002iux.3	chr17:55162552	+	chr17:55162352-55162752		0000								AAATA_1.000_-_57						GCCGCG_0.988_+_42_ACTGAA_0.999_-_52	GCCGCG_0.988_+_42_ACTGAA_0.999_-_52
AKAP10	uc010vze.1	chr17:19881129	-	chr17:19880992-19881329		0000						TTCCCCG_1.000_-_-27 TTCCGGG_0.999_-_64 TTCCGGG_1.000_-_111								CGGGCG_0.999_+_-4_GTTGAT_1.000_+_6 GGGCGG_0.999_+_-3_TATCAA_1.000_-_7	CGGGCG_0.999_+_-4_GTTGAT_1.000_+_6 GGGCGG_0.999_+_-3_TATCAA_1.000_-_7
AKAP11	uc001uys.2	chr13:42846288	+	chr13:42846088-42846488		0000						TTCCGCC_0.913_-_-83
AKAP12	uc011eep.2	chr6:151561133	+	chr6:151560933-151561333		0000								AAATA_0.987_+_-110
AKAP13	uc002bls.3	chr15:85923870	+	chr15:85923670-85924070		0000			M/G1			TTGGGGG_0.970_+_186			M/G1	G2
AKAP14	uc004esf.3	chrX:119029935	+	chrX:119029735-119030135		0000								AAACA_0.973_+_190
AKAP17A	uc004cqa.3	chrX:1710485	+	chrX:1710285-1710685		0000
AKAP17A	uc010nvx.1	chrY:1660485	+	chrY:1660285-1660685		0000
AKAP3	uc001qnb.4	chr12:4754358	-	chr12:4754158-4754558		0000					TTTAAA_0.571_+_84			AAACA_0.999_+_37					TTGGAA_0.971_+_189
AKAP4	uc004dow.1	chrX:49965664	-	chrX:49965540-49965864		0000
AKAP5	uc001xhd.4	chr14:64932216	+	chr14:64932016-64932416		0000			G1/S							G1/S		G1/S
AKAP6	uc010aml.3	chr14:32798478	+	chr14:32798278-32798678		0000				TAGGAA_1.000_-_-32 TTTGAT_1.000_-_107	TAGGAA_1.000_-_-32 TTTGAT_1.000_-_107 TTTAAA_0.684_+_-153		CAACTG_1.000_-_-18	AAACA_1.000_+_61 AAACA_1.000_-_-87 AAACA_1.000_+_103 AAACA_1.000_-_172					TCTGAA_1.000_+_27 TTTGAC_1.000_-_58 TTTGCA_1.000_+_-100 TTTGAT_1.000_-_107
AKAP7	uc003qck.3	chr6:131456825	+	chr6:131456625-131457025		0000
AKAP8	uc002nav.3	chr19:15490612	-	chr19:15490542-15490812		0000
AKAP8L	uc002nay.1	chr19:15529833	-	chr19:15529734-15530033		0000
AKAP9	uc003ulg.3	chr7:91570188	+	chr7:91569988-91570388		0000								AAACA_1.000_-_-11
AKD1	uc003ptr.4	chr6:110012415	-	chr6:110012215-110012615		0000
AKIP1	uc001mgx.3	chr11:8932700	+	chr11:8932500-8932900		0000
AKIRIN1	uc010oip.2	chr1:39456915	+	chr1:39456715-39457052		0000														CGCCCG_0.650_+_-11_TGTGAC_1.000_-_-1
AKIRIN2	uc003pmk.3	chr6:88411985	-	chr6:88411785-88412185	13.06	1111			G2	TTTGAA_1.000_+_-20 TTTAAA_1.000_+_-198	TTTGAA_1.000_+_-20 TTTAAA_1.000_+_-198	TTGGGGC_1.000_+_12 TTCCGGG_1.000_-_-186				M/G1		G2	TTTGAA_1.000_+_-20 TTGGAA_1.000_-_-192 TTTAAA_1.000_+_-198 TTTAAA_1.000_-_-198	GCCGCC_1.000_+_-29_ATTCAA_1.000_-_-19 GGCCGC_1.000_+_-30_TTCAAA_1.000_-_-20	GCCGCC_1.000_+_-29_ATTCAA_1.000_-_-19 GGCCGC_1.000_+_-30_TTCAAA_1.000_-_-20
AKNA	uc010mve.2	chr9:117156685	-	chr9:117156485-117156885		0000
AKR1A1	uc001cod.3	chr1:46016454	+	chr1:46016254-46016654		0000
AKR1B1	uc003vrp.1	chr7:134143888	-	chr7:134143814-134144088	8.3775	1111					TTTAAA_0.424_+_7
AKR1B10	uc003vrr.3	chr7:134212343	+	chr7:134212143-134212543		0000					CTTGAA_0.141_+_171
AKR1B15	uc011kpr.2	chr7:134233848	+	chr7:134233648-134234048		0000
AKR1C2	uc001iht.3	chr10:5060225	-	chr10:5060025-5060425		0000
AKR1C3	uc010qaq.1	chr10:5136567	+	chr10:5136367-5136636		0000
AKR1C4	uc001ihw.2	chr10:5238797	+	chr10:5238597-5238830		0000
AKR1D1	uc011kqe.1	chr7:137761177	+	chr7:137760977-137761264		0000				TTTGAA_0.931_-_-107	TTTGAA_0.931_-_-107								TTTGAA_0.931_-_-107
AKR1E2	uc001ihh.1	chr10:4868401	+	chr10:4868201-4868516		0000
AKR7A2	uc009vpi.1	chr1:19638640	-	chr1:19638618-19638840		0000
AKR7A3	uc001bbv.1	chr1:19615280	-	chr1:19615203-19615480		0000
AKR7L	uc021ohn.1	chr1:19600568	-	chr1:19600368-19600768		0000						TTGGCGG_0.997_+_171
AKT1	uc001ypm.3	chr14:105262080	-	chr14:105261880-105262280		0000
AKT1S1	uc002pqn.4	chr19:50380612	-	chr19:50380412-50380812		0000								AAACA_1.000_+_-104					ATTGAA_0.994_+_-18
AKT2	uc010egt.3	chr19:40791302	-	chr19:40791102-40791502		0000					TTTGTA_0.148_+_-56	TTGGGCC_0.998_+_62	CAACGG_1.000_-_59	AAATA_1.000_-_-18 AAACA_1.000_-_-40
AKT3	uc001hzz.1	chr1:244006584	-	chr1:244006472-244006784		0000				TTTGTA_1.000_-_-81 TTTGAA_0.999_+_-128 TTTGAA_0.982_+_-196	TTTGTA_1.000_-_-81 TTTGAA_0.999_+_-128 TTTGAA_0.982_+_-196	TTGGGGG_0.996_+_87	CAACTG_1.000_-_-95	AAACA_1.000_-_-67 AAATA_1.000_+_-143 AAATA_0.989_-_-151					ATTGAA_1.000_-_-19 TTTGGA_0.984_-_44 TTTGTA_1.000_-_-81 GTTGAA_1.000_+_-93 TTTGAA_0.999_+_-128 TTTCAA_0.999_-_-195 TTTGAA_0.982_+_-196
AKTIP	uc010vgx.2	chr16:53537170	-	chr16:53536970-53537370		0000				TTTGAT_0.972_+_-172	TTTGAT_0.972_+_-172	TTCCGCC_0.999_-_-79 TTCCGGG_0.986_-_-135							TTTGCA_0.998_+_-167 TTTGAT_0.972_+_-172
AL157440	uc001kec.1	chr10:88730571	-	chr10:88730505-88730771		0000
ALAD	uc011lxf.2	chr9:116163618	-	chr9:116163418-116163818		0000						TTCCGGG_0.934_+_28
ALAS1	uc003dcz.2	chr3:52232098	+	chr3:52231898-52232298		0000
ALAS2	uc004dud.4	chrX:55057497	-	chrX:55057297-55057697		0000
ALB	uc003hgs.4	chr4:74269971	+	chr4:74269771-74270044		0000				TTTGTA_0.999_+_-71 TTTGAT_0.908_+_-193	TTTGTA_0.607_-_-44 TTTGTA_0.999_+_-71 TTTGAT_0.908_+_-193			AAACA_1.000_+_-101 AAATA_0.998_+_-124					TTTGTA_0.999_+_-71 TATGAA_0.914_+_-78 TTTGAC_0.999_-_-104 TTTGAT_0.908_+_-193
ALCAM	uc003dvv.3	chr3:105085556	+	chr3:105085356-105085756		0000													GTTGAA_0.993_-_82
ALDH16A1	uc010yas.2	chr19:49956472	+	chr19:49956272-49956588	11.3567	1011
ALDH18A1	uc001kky.3	chr10:97416567	-	chr10:97416367-97416767		0000					TTCGAG_0.406_-_-16
ALDH1A1	uc004ajd.3	chr9:75568233	-	chr9:75568033-75568433		0000				TTTGTA_1.000_+_27 TTTAAA_1.000_+_111 TTTGTA_0.990_-_142	TTTAAA_1.000_+_111 TTTGTA_0.990_-_142 TTTGTA_1.000_+_27 TTTGTA_0.764_-_69		TAACTG_0.999_+_-28	AAATA_1.000_+_48 AAATA_0.981_+_145					TTTGTA_1.000_+_27 TTTGCA_1.000_-_45 TTTAAA_1.000_+_111 TTTAAA_1.000_-_111 TTTGAC_1.000_-_117 TTTGTA_0.990_-_142
ALDH1A2	uc002aex.3	chr15:58358121	-	chr15:58357921-58358321		0000														CGGCCC_0.979_+_137_TTGGAC_0.993_-_147 GCGCGG_0.136_+_69_TATGTA_0.974_+_79 GCGGGC_0.301_+_71_TGTAAA_0.985_+_81 GCGGGC_0.301_+_71_TTTACA_0.985_-_81	CGGCCC_0.979_+_137_TTGGAC_0.993_-_147
ALDH1A3	uc002bwn.4	chr15:101420008	+	chr15:101419808-101420112		0000			G2/M							G2/M
ALDH1B1	uc004aay.3	chr9:38392660	+	chr9:38392460-38392860		0000
ALDH1L1	uc003eim.1	chr3:125899485	-	chr3:125899285-125899685	6.56	0010
ALDH1L2	uc001tlc.3	chr12:105478341	-	chr12:105478214-105478541		0000
ALDH2	uc001tst.3	chr12:112204690	+	chr12:112204490-112204786		0000
ALDH3A1	uc010cqu.3	chr17:19648772	-	chr17:19648572-19648972		0000
ALDH3A2	uc002gwa.1	chr17:19552063	+	chr17:19551863-19552263		0000
ALDH3B1	uc001ona.3	chr11:67777789	+	chr11:67777589-67777989		0000
ALDH3B2	uc001oms.3	chr11:67448685	-	chr11:67448485-67448885		0000					TTTGAT_0.192_+_-56 CTTGAA_0.253_+_-184
ALDH4A1	uc001bbb.3	chr1:19229293	-	chr1:19229093-19229493		0000
ALDH5A1	uc003neg.3	chr6:24495196	+	chr6:24494996-24495224		0000
ALDH6A1	uc001xpo.3	chr14:74551196	-	chr14:74551097-74551396	7	1011
ALDH7A1	uc011cxa.2	chr5:125931082	-	chr5:125930971-125931282		0000
ALDH8A1	uc003qex.3	chr6:135271260	-	chr6:135271191-135271460		0000
ALDH9A1	uc001gdh.1	chr1:165667900	-	chr1:165667795-165668100		0000
ALDOA	uc010veg.2	chr16:30076993	+	chr16:30076793-30077193		0000				TTTAAA_0.989_+_59	TTTAAA_0.989_+_59								TTTAAA_0.989_+_59 TTTAAA_0.989_-_59 TTTTAA_0.955_-_60
ALDOB	uc004bbk.2	chr9:104198062	-	chr9:104197862-104198262		0000								AAACA_0.997_+_-97 AAACA_0.980_-_168
ALDOC	uc002hbp.3	chr17:26903951	-	chr17:26903751-26904151		0000
ALG1	uc002cym.3	chr16:5121809	+	chr16:5121609-5121850		0000
ALG10	uc001rlm.3	chr12:34175215	+	chr12:34175015-34175415	13.4767	1011			G1/S									G1/S
ALG10B	uc001rln.4	chr12:38710556	+	chr12:38710356-38710695	10.29	1011					TTCGAG_0.848_+_57
ALG11	uc001vga.3	chr13:52586522	+	chr13:52586322-52586554		0000						TTCGGGG_0.975_+_15
ALG12	uc003biy.3	chr22:50312106	-	chr22:50311906-50312306		0000						TTGGGCC_0.999_-_-118
ALG13	uc004epi.2	chrX:110924345	+	chrX:110924145-110924446		0000
ALG14	uc001dra.2	chr1:95538507	-	chr1:95538454-95538707		0000
ALG1L	uc003eig.2	chr3:125655887	-	chr3:125655687-125656087		0000
ALG1L2	uc011bld.2	chr3:129800673	+	chr3:129800473-129800859		0000
ALG2	uc004azf.3	chr9:101984246	-	chr9:101984176-101984446		0000
ALG3	uc011brf.1	chr3:183966759	-	chr3:183966728-183966959		0000
ALG5	uc001uvy.3	chr13:37573504	-	chr13:37573437-37573704		0000						TTCCGCC_0.964_+_16
ALG6	uc021oof.1	chr1:63833260	+	chr1:63833060-63833460		0000
ALG8	uc001oyz.1	chr11:77850699	-	chr11:77850634-77850899	13.6175	1111				TTTAAA_0.986_+_-82	TTTAAA_0.986_+_-82								TTTAAA_0.986_+_-82 TTTAAA_0.986_-_-82	TGGGCG_0.293_+_-93_GTTTAA_0.964_+_-83
ALG9	uc009yyh.1	chr11:111742305	-	chr11:111742206-111742505		0000
ALK	uc002rmy.3	chr2:30144477	-	chr2:30144277-30144677		0000													TTTGCA_1.000_+_-161
ALKBH1	uc001xuc.1	chr14:78174356	-	chr14:78174347-78174454		0000			G2						G2
ALKBH2	uc001tnx.2	chr12:109531293	-	chr12:109531093-109531493	7.52	0010
ALKBH3	uc001mxs.2	chr11:43902356	+	chr11:43902156-43902556		0000
ALKBH4	uc003uzm.3	chr7:102105321	-	chr7:102105283-102105521		0000														CGGCGC_0.116_+_-30_GTTGTA_1.000_-_-20
ALKBH5	uc010cpw.3	chr17:18086866	+	chr17:18086666-18087066		0000					CTTGAA_0.229_+_123
ALKBH6	uc002ocw.1	chr19:36505141	-	chr19:36505135-36505341	8.8575	1111
ALKBH7	uc002meo.2	chr19:6372443	+	chr19:6372243-6372643		0000					TTTGAA_0.130_-_-190
ALKBH8	uc009yxp.3	chr11:107436461	-	chr11:107436261-107436661	6.55	0010														CGCGGG_0.007_+_-26_TGGGAA_0.998_+_-16
ALLC	uc010ewt.3	chr2:3705785	+	chr2:3705585-3705985		0000
ALMS1	uc002sje.1	chr2:73612885	+	chr2:73612685-73612996		0000
ALOX12	uc002gdx.4	chr17:6899383	+	chr17:6899183-6899436		0000
ALOX12B	uc002gjy.1	chr17:7991021	-	chr17:7990821-7991221		0000													TCTGAA_0.999_-_-64
ALOX15	uc002fyh.3	chr17:4544971	-	chr17:4544971-4545171		0000
ALOX15B	uc002gjv.3	chr17:7942357	+	chr17:7942157-7942473		0000
ALOX5	uc001jce.3	chr10:45869628	+	chr10:45869428-45869727		0000
ALOX5AP	uc010tdr.2	chr13:31287614	+	chr13:31287414-31287814		0000
ALOXE3	uc010vuo.2	chr17:8022234	-	chr17:8022096-8022434		0000
ALPI	uc002vst.4	chr2:233320832	+	chr2:233320632-233320909		0000
ALPK1	uc011cfx.2	chr4:113218498	+	chr4:113218298-113218698		0000			G2		TAGGAA_0.297_-_3							G2
ALPK2	uc002lhj.4	chr18:56296189	-	chr18:56295989-56296389		0000			S-phase	TAGGAA_0.932_+_-2	TAGGAA_0.932_+_-2			AAATA_0.952_+_-100 AAACA_0.947_+_-133		S-phase
ALPK3	uc002ble.3	chr15:85359910	+	chr15:85359710-85360077		0000
ALPL	uc010odn.2	chr1:21835857	+	chr1:21835657-21836057		0000														CGCGGC_0.838_+_20_TATAAA_0.999_-_30 CGCGGC_0.838_+_20_TTTATA_0.999_+_30 GCGGCC_0.872_+_21_TTATAA_0.998_-_31 GCGGCC_0.872_+_21_TTATAA_0.998_+_31
ALPP	uc002vsq.3	chr2:233243347	+	chr2:233243147-233243512		0000
ALPPL2	uc002vss.4	chr2:233271551	+	chr2:233271351-233271604		0000
ALS2	uc002uyr.3	chr2:202645895	-	chr2:202645695-202646095		0000
ALS2CL	uc003cqb.2	chr3:46735194	-	chr3:46734994-46735394		0000
ALS2CR12	uc002uya.4	chr2:202222101	-	chr2:202221901-202222301		0000					TTTGTA_0.290_+_164			AAACA_0.996_+_-8
ALS2CR8	uc010zic.1	chr2:203776977	+	chr2:203776777-203777177		0000				TTTGAA_1.000_+_86	TTTGAA_1.000_+_86								TTTGAA_1.000_+_86	TCCGGC_0.976_+_107_TGGGAA_0.994_-_117	TCCGGC_0.976_+_107_TGGGAA_0.994_-_117
ALX1	uc001tae.4	chr12:85674035	+	chr12:85673835-85674039		0000				CTTGAA_1.000_-_-196	CTTGAA_1.000_-_-196								CTTGAA_1.000_-_-196 TTTCAA_1.000_+_-197	GCCGGG_1.000_+_-158_ATTAAA_0.993_+_-148 GCCGGG_1.000_+_-158_TTTAAT_0.993_-_-148	GCCGGG_1.000_+_-158_ATTAAA_0.993_+_-148 GCCGGG_1.000_+_-158_TTTAAT_0.993_-_-148
ALX3	uc001dzb.3	chr1:110613322	-	chr1:110613234-110613522		0000						TTGGCGG_0.999_+_14 TTCCCGG_0.963_+_-149
ALX4	uc001myb.3	chr11:44331716	-	chr11:44331612-44331916		0000
ALYREF	uc002kbu.2	chr17:79849462	-	chr17:79849456-79849662		0000
AMACR	uc003jij.3	chr5:34008220	-	chr5:34008124-34008420		0000			G1/S								G1/S
AMBN	uc003hfl.3	chr4:71457974	+	chr4:71457774-71458075		0000				TTTAAA_1.000_+_-32 TTTGAT_1.000_+_-52	TTTAAA_1.000_+_-32 TTTGAT_1.000_+_-52			AAATA_1.000_+_-29 AAATA_1.000_+_-171					TTAGAA_0.920_-_-19 TTTAAA_1.000_+_-32 TTTAAA_1.000_-_-32 TTTGAT_1.000_+_-52 TTAGAA_0.999_+_56 TTTTAA_1.000_-_-175
AMBP	uc004bie.4	chr9:116840752	-	chr9:116840552-116840952		0000								AAACA_0.980_+_126
AMBRA1	uc010rgu.1	chr11:46612914	-	chr11:46612714-46613114		0000					TTTAAA_0.492_+_-63
AMD1	uc011eba.1	chr6:111195986	+	chr6:111195786-111196186		0000			G2	TTTAAA_0.986_+_164	TTTAAA_0.986_+_164	TTCCCGG_0.984_-_139	TAACGG_1.000_+_52	AAATA_0.999_-_98	M/G1			G2	TTGGAA_1.000_-_101 TTTGGA_1.000_-_102 GTTGAA_1.000_-_117 TTTTAA_0.986_+_163 TTTAAA_0.986_+_164 TTTAAA_0.986_-_164 TTTTAA_0.986_-_165	GCCGCG_0.004_+_-116_ATTGAC_0.995_+_-106 GCCGGG_0.986_+_138_TTTTAT_1.000_+_148	GCCGGG_0.986_+_138_TTTTAT_1.000_+_148
AMDHD1	uc009zth.2	chr12:96337070	+	chr12:96336870-96337176		0000
AMDHD2	uc010uwc.2	chr16:2570362	+	chr16:2570162-2570459		0000			G1/S									G1/S
AMELX	uc004cuu.3	chrX:11311532	+	chrX:11311332-11311732		0000				TTTGAA_0.909_-_23	TTTGAA_0.909_-_23 TTTGAA_0.575_-_50			AAATA_0.983_-_69					TTGGAA_0.992_+_-12 TTTCAA_0.954_+_22 TTTGAA_0.909_-_23 TTAGAA_0.904_-_-121
AMELY	uc004fqz.3	chrY:6742068	-	chrY:6741868-6742268		0000					CTTGAA_0.239_+_-41 TTTAAA_0.521_+_48			AAACA_0.999_+_-198					GTTGAA_0.947_-_-87
AMFR	uc002eiy.3	chr16:56459444	-	chr16:56459244-56459644		0000						TTCCGCG_1.000_+_-4
AMH	uc002lvh.2	chr19:2249112	+	chr19:2248912-2249312		0000					TTTGAG_0.852_+_71	TTGGGGG_0.951_-_115
AMHR2	uc021qyg.1	chr12:53817638	+	chr12:53817438-53817718	6.37	1000
AMICA1	uc001psk.2	chr11:118095809	-	chr11:118095609-118096009		0000			G1/S					AAACA_0.990_-_0				G1/S
AMIGO1	uc001dxx.4	chr1:110052336	-	chr1:110052136-110052536		0000								AAACA_0.996_+_-94
AMIGO2	uc001rpl.3	chr12:47473734	-	chr12:47473534-47473934		0000			S-phase							S-phase		S
AMIGO3	uc003cxj.3	chr3:49757238	-	chr3:49757038-49757438		0000
AMMECR1	uc004eoo.3	chrX:109561380	-	chrX:109561299-109561580		0000													TTGGAA_0.999_-_73
AMN	uc001ymg.4	chr14:103388992	+	chr14:103388792-103389025		0000
AMOT	uc004epr.3	chrX:112066372	-	chrX:112066354-112066572		0000								AAACA_1.000_-_-61					TGTGAA_1.000_-_-9
AMOTL1	uc001pfc.3	chr11:94501507	+	chr11:94501307-94501677		0000			S-phase									S	TGTGAA_0.997_+_79	TGGGGC_0.874_+_57_GGTGAA_1.000_+_67
AMOTL2	uc003eqh.1	chr3:134093406	-	chr3:134093206-134093606		0000				TTTGAT_1.000_+_16	TTTGAT_1.000_+_16	TTCCCCC_1.000_-_27		AAATA_1.000_-_2					TTTGAT_1.000_+_16
AMPD1	uc001efe.2	chr1:115238239	-	chr1:115238191-115238439		0000				TTTGAT_0.999_-_14 TTTGAT_1.000_-_-47	TTTGAT_0.999_-_14 TTTGAT_1.000_-_-47	TTCCGGG_1.000_+_21		AAATA_1.000_+_-28 AAATA_0.994_+_37 AAACA_0.997_-_-58					TTTGAT_0.999_-_14 TTTGAT_1.000_-_-47	CCGGGG_1.000_+_23_TTTGCT_1.000_-_33	CCGGGG_1.000_+_23_TTTGCT_1.000_-_33
AMPD2	uc001dyc.1	chr1:110163275	+	chr1:110163075-110163475		0000						TTCCCGG_0.988_+_-104
AMPD3	uc001min.1	chr11:10472223	+	chr11:10472023-10472423		0000						TTCCGGC_0.983_+_-29
AMPH	uc003tgu.3	chr7:38671167	-	chr7:38670967-38671367		0000			G1/S									G1/S
AMT	uc011bcq.2	chr3:49460111	-	chr3:49459911-49460311		0000
AMTN	uc010ihy.1	chr4:71384297	+	chr4:71384097-71384494		0000				TTTAAA_0.991_+_-40	TTTGAA_0.752_-_-183 CTTGAA_0.786_+_-199 TTTGTA_0.876_-_-27 TTTAAA_0.991_+_-40 CTTGAA_0.809_-_95			AAACA_1.000_+_-107 AAACA_0.986_+_-195					TTTAAA_0.991_+_-40 TTTAAA_0.991_-_-40 TCTGAA_0.999_+_190
AMY1B	uc001duv.3	chr1:104198301	+	chr1:104198101-104198501		0000
AMY1B	uc001duz.3	chr1:104292439	+	chr1:104292239-104292639		0000					TTTGAT_0.113_+_-70 CTTGAA_0.103_-_-107
AMY1C	uc001duw.1	chr1:104238912	-	chr1:104238712-104239112		0000
AMY2A	uc001dut.3	chr1:104159998	+	chr1:104159798-104160062		0000					TTTGAA_0.130_-_54			AAATA_0.943_-_-11 AAATA_0.969_+_25
AMY2B	uc001duq.3	chr1:104095895	+	chr1:104095695-104096095		0000			G2		TTTGAA_0.794_+_-158	TTGGGGC_0.990_+_69		AAATA_1.000_+_15				G2	TTAGAA_1.000_+_-3 TTTGCA_1.000_-_37
AMZ1	uc003smr.1	chr7:2719162	+	chr7:2718962-2719362		0000
AMZ2	uc002jgw.1	chr17:66244144	+	chr17:66243944-66244344		0000			G1/S									G1/S
ANAPC1	uc002thi.3	chr2:112641741	-	chr2:112641541-112641941		0000					TTTGAA_0.764_+_7
ANAPC10	uc003ijw.4	chr4:146019368	-	chr4:146019168-146019568	6.86	0010						TTCCGCC_0.919_-_-35 TTGGCCG_1.000_-_-111
ANAPC11	uc002kcb.1	chr17:79849598	+	chr17:79849456-79849798		0000						TTCCCGC_0.951_+_74
ANAPC13	uc003eqi.3	chr3:134204863	-	chr3:134204663-134205063		0000						TTCCCGC_0.993_+_-195	TAACGG_1.000_-_-189
ANAPC16	uc001jsv.3	chr10:73975757	+	chr10:73975557-73975957		0000
ANAPC2	uc004clr.1	chr9:140083057	-	chr9:140082984-140083178		0000
ANAPC4	uc003gro.3	chr4:25378847	+	chr4:25378647-25379047		0000
ANAPC5	uc001uag.3	chr12:121790265	-	chr12:121790143-121790465		0000
ANAPC7	uc001tqp.4	chr12:110841535	-	chr12:110841534-110841735		0000	1
ANG;RNASE4	uc001vxz.3	chr14:21156931	+	chr14:21156731-21157131	7.7	1000				TTTGTA_0.940_+_81	TTTGTA_0.940_+_81								TTTGTA_0.940_+_81
ANGPT1	uc003ymo.3	chr8:108510254	-	chr8:108510054-108510454		0000				TTTGTA_1.000_+_-49	TTTGTA_1.000_+_-49			AAATA_1.000_+_103 AAATA_0.971_-_-150					TGTGAA_1.000_+_32 TTTGTA_1.000_+_-49
ANGPT2	uc003wqk.4	chr8:6420784	-	chr8:6420584-6420984		0000			M/G1									M/G1
ANGPT4	uc002wei.3	chr20:896960	-	chr20:896857-897160		0000					TTTGTA_0.590_+_-9			AAATA_1.000_+_-45
ANGPTL1	uc001gmb.3	chr1:178840215	-	chr1:178840015-178840415		0000					TTTGTA_0.580_-_-113 TTTGAA_0.338_-_-160			AAATA_0.943_-_-123					TTTTAA_0.994_-_131 TTTGAC_0.982_-_152 GTTGAA_1.000_-_-186
ANGPTL2	uc004bqr.1	chr9:129885044	-	chr9:129884844-129885244		0000				TTTGAA_1.000_-_127	TTTGAA_1.000_-_127	TTGGCGG_0.991_-_-105							TTTGAA_1.000_-_127
ANGPTL3	uc001das.1	chr1:63063186	+	chr1:63062986-63063237		0000				TTTGAT_0.999_+_-151	TTTGAT_0.999_+_-151								TTTGAT_0.999_+_-151
ANGPTL4	uc002mjr.1	chr19:8429010	+	chr19:8428810-8429205		0000			M/G1							M/G1
ANGPTL5	uc001pgl.3	chr11:101787253	-	chr11:101787053-101787453	6.33	1000
ANGPTL6	uc002mmy.1	chr19:10213425	-	chr19:10213225-10213625		0000								AAATA_1.000_+_-31
ANGPTL7	uc001ase.3	chr1:11249397	+	chr1:11249197-11249597		0000					TTTGAG_0.744_+_72			AAATA_1.000_-_-14 AAACA_0.996_+_-20						TGCCGC_0.413_+_-118_GGTGAA_1.000_-_-108
ANK1	uc003xom.3	chr8:41754280	-	chr8:41754080-41754480		0000
ANK2	uc011cgb.1	chr4:113970784	+	chr4:113970584-113970884		0000				TTTGAT_0.965_+_63	TTCGAG_0.117_+_-169 TTTGAT_0.965_+_63 TTTGAA_0.237_-_95 CTTGAA_0.317_-_-147		CAACTG_1.000_-_-72	AAACA_1.000_+_-75					TTTGAT_0.965_+_63 GTTGAA_1.000_+_-105
ANK3	uc001jky.3	chr10:62149634	-	chr10:62149434-62149834		0000			G1/S	TTTAAA_0.997_+_164	TTTGAA_0.391_-_-125 TTTAAA_0.997_+_164	TTCCCCC_0.999_+_-20		AAATA_1.000_+_-111				G1/S	TTTGCA_1.000_+_-29 TCTGAA_1.000_-_-102 TTAGAA_1.000_-_-116 TTTTAA_0.994_+_163 TTTAAA_0.997_+_164 TTTAAA_0.997_-_164 TTTTAA_0.998_-_165
ANKAR	uc002uqw.2	chr2:190540710	+	chr2:190540510-190540910		0000
ANKDD1A	uc002aoa.3	chr15:65204100	+	chr15:65203900-65204129		0000
ANKFY1	uc002fxo.3	chr17:4167274	-	chr17:4167236-4167474	5.66	0010
ANKH	uc003jfm.4	chr5:14871887	-	chr5:14871687-14872087		0000						TTCCGGG_0.982_+_-12
ANKHD1-EIF4EBP3	uc003lfp.3	chr5:139781398	+	chr5:139781198-139781552		0000						TTGGCGG_1.000_+_-112
ANKIB1	uc003ulw.2	chr7:91875547	+	chr7:91875347-91875747		0000
ANKK1	uc001pny.3	chr11:113258512	+	chr11:113258312-113258606		0000
ANKLE1	uc010eao.1	chr19:17392453	+	chr19:17392253-17392567		0000
ANKLE2	uc001ukx.2	chr12:133338451	-	chr12:133338384-133338651		0000
ANKMY1	uc010fzd.1	chr2:241497405	-	chr2:241497205-241497605		0000
ANKMY2	uc003sti.3	chr7:16685442	-	chr7:16685242-16685642		0000
ANKRA2	uc003kcu.2	chr5:72861511	-	chr5:72861311-72861711		0000			G1/S							G1/S		G1/S|S
ANKRD1	uc001khe.1	chr10:92681032	-	chr10:92680832-92681232		0000			S-phase					AAATA_1.000_+_-77		S-phase			TGTGAA_1.000_-_-5 TTGGAA_1.000_+_127 TATGAA_1.000_+_-152
ANKRD11	uc002fng.1	chr16:89556969	-	chr16:89556769-89557169		0000			M/G1			TTGGCCC_1.000_-_-67 TTGGCCC_0.993_-_-93				M/G1
ANKRD12	uc010wzn.2	chr18:9136750	+	chr18:9136550-9136950		0000				CTTGAA_0.947_-_94	CTTGAA_0.947_-_94			AAACA_1.000_-_90					TTTCAA_0.966_+_93 CTTGAA_0.947_-_94
ANKRD13C	uc009wbk.3	chr1:70820417	-	chr1:70820217-70820617		0000						TTCCCCC_0.996_+_115		AAACA_0.977_-_36
ANKRD17	uc003hgq.3	chr4:74124502	-	chr4:74124385-74124702		0000						TTCGGCC_0.999_-_48
ANKRD2	uc001knw.3	chr10:99332255	+	chr10:99332055-99332455		0000						TTGGGCC_0.920_+_194
ANKRD20A3	uc004aeu.3	chr9:67926760	+	chr9:67926560-67926872		0000
ANKRD23	uc002sxa.3	chr2:97509758	-	chr2:97509729-97509958		0000								AAATA_0.995_-_-131
ANKRD26	uc001ith.2	chr10:27389427	-	chr10:27389255-27389627		0000												G1/S|S
ANKRD27	uc002ntn.1	chr19:33166102	-	chr19:33165902-33166302		0000					TAGGAA_0.824_+_-135								TTTTAA_0.998_+_119
ANKRD28	uc003caj.1	chr3:15901053	-	chr3:15900910-15901253		0000			M/G1									M/G1
ANKRD30A	uc021ppc.1	chr10:37414784	+	chr10:37414584-37414883		0000
ANKRD30B	uc021uhy.1	chr18:14748238	+	chr18:14748038-14748418		0000
ANKRD32	uc003kkr.4	chr5:93954390	+	chr5:93954190-93954590	10.67	1011					TAGGAA_0.856_+_96	TTCCCGC_1.000_-_-30 TTCCGGG_0.982_+_-52 TTCCGGG_0.993_-_-72		AAACA_0.999_-_-21
ANKRD34B	uc003kgw.3	chr5:79866304	-	chr5:79866104-79866504		0000
ANKRD37	uc003ixm.3	chr4:186317839	+	chr4:186317639-186318039		0000				TTTAAA_0.958_+_127	TTTAAA_0.958_+_127			AAACA_0.930_-_4					TTTAAA_0.958_+_127 TTTAAA_0.958_-_127
ANKRD44	uc002uud.2	chr2:198175521	-	chr2:198175328-198175721		0000						TTCCCCG_1.000_+_122							TTTGCA_0.996_-_-1 TTTGAC_1.000_-_72
ANKRD46	uc003yjo.1	chr8:101572012	-	chr8:101571812-101572212		0000			G1/S								G1/S
ANKRD49	uc001pex.3	chr11:94227152	+	chr11:94226952-94227352	14.4875	1111			G2			TTCCGGG_0.988_-_8						G2
ANKRD5	uc002wnp.3	chr20:10015696	+	chr20:10015496-10015896		0000			G1/S									G1/S
ANKRD54	uc003auc.3	chr22:38240353	-	chr22:38240245-38240553		0000	1				TTTGTA_0.115_+_-185	TTGCGGG_0.998_+_-11	CAACGG_0.969_-_99
ANKRD62	uc002kqs.3	chr18:12102704	+	chr18:12102504-12102904		0000
ANKRD7	uc003vji.3	chr7:117864711	+	chr7:117864511-117864884		0000
ANKS1A	uc010jvp.2	chr6:34857037	+	chr6:34856837-34857179		0000						TTCCGGG_1.000_-_-11 TTGGGGG_0.999_+_47 TTGCCCG_1.000_+_59
ANKS1B	uc001tgf.2	chr12:100378432	-	chr12:100378232-100378632		0000				TTTGAG_0.949_-_82	TTTGAG_0.949_-_82								TTTGAG_0.949_-_82
ANKS4B	uc010bwp.1	chr16:21245015	+	chr16:21244815-21245058		0000						TTGCCCC_0.991_+_-73
ANKS6	uc004ayu.3	chr9:101558794	-	chr9:101558773-101558994		0000
ANKZF1	uc010zkw.1	chr2:220094478	+	chr2:220094278-220094678		0000			G1/S									G1/S
ANLN	uc003tfg.3	chr7:36429431	+	chr7:36429231-36429575	11.355	1111	1		G2/M	TTTGAA_1.000_-_14 TTTGAA_1.000_+_20	TTTGAA_1.000_-_14 TTTGAA_1.000_+_20				G2/M	G2/M		G2	TTTGAA_1.000_-_14 TTTGAA_1.000_+_20	CGGCGC_0.864_+_3_ATTCAA_1.000_+_13
ANO1	uc001opj.3	chr11:69924407	+	chr11:69924207-69924607		0000					TTTAAA_0.776_+_-80			AAATA_0.997_+_-130
ANO10	uc011azt.2	chr3:43663560	-	chr3:43663360-43663760		0000
ANO2	uc001qnm.2	chr12:6055398	-	chr12:6055326-6055598		0000
ANO3	uc001mqt.4	chr11:26353677	+	chr11:26353477-26353822		0000
ANO4	uc010svm.1	chr12:101188373	+	chr12:101188173-101188573		0000							TAACTG_0.999_+_-14
ANO5	uc001mqi.2	chr11:22214721	+	chr11:22214521-22214921		0000
ANO6	uc010sld.1	chr12:45609769	+	chr12:45609569-45609969		0000
ANO7	uc002wax.2	chr2:242127923	+	chr2:242127723-242128026		0000
ANO8	uc002ngf.2	chr19:17445638	-	chr19:17445479-17445812		0000			G1/S									G1/S		GGGCGC_1.000_+_44_TTTGTC_1.000_+_54	GGGCGC_1.000_+_44_TTTGTC_1.000_+_54
ANO9	uc010qvv.1	chr11:442011	-	chr11:441926-442211		0000						TTCCGCG_0.936_-_0
ANP32A	uc002arl.3	chr15:69113261	-	chr15:69113090-69113461		0000				TTTGAA_1.000_-_79	TTTGAA_1.000_-_79	TTCCCCC_1.000_+_-92 TTCGGGG_1.000_+_108 TTCCGCC_1.000_+_128 TTCGGGG_0.998_-_-179							TTTGAA_1.000_-_79 ATTGAA_1.000_+_122	CCGCCC_0.999_+_-182_TTAGAT_1.000_-_-172 CGCCCC_0.999_+_-181_TCTAAA_1.000_+_-171 CGCCCC_0.999_+_-181_TTTAGA_1.000_-_-171 CGCGGG_1.000_+_137_TCTGCA_1.000_+_147	CCGCCC_0.999_+_-182_TTAGAT_1.000_-_-172 CGCCCC_0.999_+_-181_TCTAAA_1.000_+_-171 CGCCCC_0.999_+_-181_TTTAGA_1.000_-_-171 CGCGGG_1.000_+_137_TCTGCA_1.000_+_147
ANP32B	uc004aya.3	chr9:100745488	+	chr9:100745288-100745688		0000			G2/M						G2/M
ANP32E	uc001etv.4	chr1:150208504	-	chr1:150208304-150208704	15.3825	1111	1	1	G2/M	TTTGAT_1.000_-_-144 TTTGAA_1.000_-_-184	TTTGAT_1.000_-_-144 TTTGAA_1.000_-_-184	TTGGCGG_1.000_+_17	TAACTG_1.000_+_-136		G2/M		G2/M	G2/M	ATTGAA_1.000_+_58 TTTGAT_1.000_-_-144 TTTGAA_1.000_-_-184
ANPEP	uc002bop.4	chr15:90358072	-	chr15:90357872-90358272		0000					TTTAAA_0.764_+_-43
ANTXR1	uc002sff.3	chr2:69240275	+	chr2:69240075-69240475		0000			M/G1	TTTAAA_0.999_+_7 TTTGAA_1.000_+_-21 CTTGAA_0.997_+_145	TTTAAA_0.558_+_114 CTTGAA_0.997_+_145 TTTAAA_0.999_+_7 TTTGAA_1.000_+_-21 TTTGAA_0.258_+_-104			AAATA_0.999_-_5	M/G1				TTTAAA_0.999_+_7 TTTAAA_0.999_-_7 TTTTAA_1.000_-_8 TTTCAA_1.000_-_-20 TTTGAA_1.000_+_-21 CTTGAA_0.997_+_145 TTTCAA_0.999_-_146	CCCCCC_1.000_+_-9_TATGAT_0.998_-_1	CCCCCC_1.000_+_-9_TATGAT_0.998_-_1
ANTXR2	uc003hlz.4	chr4:80994477	-	chr4:80994277-80994677		0000												G2|G2/M
ANXA1	uc004ajf.1	chr9:75766780	+	chr9:75766580-75766980		0000			M/G1	TTTGAA_0.980_-_-92	TTTAAA_0.128_+_-40 TTTGAA_0.980_-_-92 TTTGAA_0.422_+_98			AAACA_0.999_+_-89 AAACA_0.949_-_-120 AAACA_1.000_-_-130				M/G1	TTTGAA_0.980_-_-92 TTTGCA_0.997_+_-141
ANXA10	uc003irm.3	chr4:169013687	+	chr4:169013487-169013851		0000					TTTGAA_0.325_-_-162 TTTGAT_0.678_-_159			AAATA_0.996_-_-75
ANXA11	uc010qly.1	chr10:81965328	-	chr10:81965128-81965528		0000
ANXA13	uc003yqu.3	chr8:124749647	-	chr8:124749574-124749847		0000				TTTGAA_0.992_-_-62	TTTGAA_0.992_-_-62			AAACA_0.939_+_-33					TTTGAA_0.992_-_-62
ANXA2	uc010bgj.3	chr15:60690185	-	chr15:60690112-60690385		0000
ANXA2	uc010mjx.3	chr9:33624222	+	chr9:33624022-33624271		0000					TTTGAA_0.515_-_44
ANXA3	uc003hld.3	chr4:79472741	+	chr4:79472541-79472941		0000			G2/M									G2/M
ANXA4	uc002sfr.4	chr2:69969126	+	chr2:69968926-69969326		0000
ANXA5	uc003idv.4	chr4:122618147	-	chr4:122617947-122618347		0000							CAACGG_0.935_-_-3
ANXA6	uc003ltl.2	chr5:150537443	-	chr5:150537243-150537643		0000							TAACGG_0.997_+_118
ANXA7	uc009xrf.1	chr10:75173841	-	chr10:75173641-75174041		0000
ANXA8L1	uc001jeh.3	chr10:47174122	-	chr10:47174116-47174322		0000
ANXA8L1	uc010qgi.2	chr10:48255224	+	chr10:48255024-48255230		0000
ANXA8L2	uc001jem.3	chr10:47746919	+	chr10:47746719-47747111		0000
ANXA9	uc001ewa.2	chr1:150954498	+	chr1:150954298-150954698		0000					TTTGAG_0.315_+_43	TTGGGGC_1.000_-_-152
AOAH	uc022abu.1	chr7:36764154	-	chr7:36763954-36764354	5.8	0100													TTTGCA_0.989_+_-40
AOC2	uc002ibu.3	chr17:40996608	+	chr17:40996408-40996643		0000			M/G1		TAGGAA_0.694_-_-59				M/G1				TTGGAA_0.999_+_-127
AOC3	uc002ibv.3	chr17:41003200	+	chr17:41003000-41003360		0000			M/G1						M/G1
AOX1	uc002uvx.3	chr2:201450730	+	chr2:201450530-201450831		0000
AP1AR	uc003iaj.4	chr4:113152894	+	chr4:113152694-113153094		0000
AP1B1	uc003afi.3	chr22:29784572	-	chr22:29784372-29784772		0000						TTCCGCC_1.000_+_19								CCGCGG_1.000_+_96_TTTGGT_0.999_+_106	CCGCGG_1.000_+_96_TTTGGT_0.999_+_106
AP1G1	uc010cgg.3	chr16:71842976	-	chr16:71842776-71843176		0000		1	M/G1					AAATA_1.000_+_31				M/G1	TTTTAA_0.917_-_165
AP1G2	uc001wkn.2	chr14:24037279	-	chr14:24037079-24037479		0000				TTTGAA_1.000_-_23 TTTGAA_0.994_-_68	TTTGTA_0.888_-_-17 TTTGAA_1.000_-_23 TTTGAA_0.994_-_68	TTGGCGG_1.000_-_-47		AAATA_1.000_+_4 AAATA_1.000_-_-88 AAACA_1.000_-_-147					TTTGAA_1.000_-_23 TTTGAA_0.994_-_68 ATTGAA_1.000_+_-70 TTTGGA_0.994_-_74 TTTGAC_1.000_-_-157
AP1M1	uc002ndu.2	chr19:16308664	+	chr19:16308464-16308837		0000							TAACGG_1.000_+_30							CCCGGC_0.969_+_88_GTTGAG_0.908_-_98	CCCGGC_0.969_+_88_GTTGAG_0.908_-_98
AP1M2	uc002mpd.3	chr19:10697991	-	chr19:10697907-10698191		0000														GCCGCC_0.982_+_-49_CTTTAA_1.000_+_-39	GCCGCC_0.982_+_-49_CTTTAA_1.000_+_-39
AP1S1	uc003uxv.4	chr7:100797685	+	chr7:100797485-100797795		0000			G1/S			TTCGGCC_0.999_-_75						G1/S
AP1S2	uc004cxi.3	chrX:15873100	-	chrX:15872936-15873300		0000						TTCCGGG_1.000_+_-77
AP1S2	uc010wot.1	chr17:58180280	-	chr17:58180164-58180480		0000					TTTGTA_0.497_+_-173
AP1S3	uc010fwx.2	chr2:224702319	-	chr2:224702167-224702519		0000
AP2A1	uc002ppn.3	chr19:50270179	+	chr19:50269979-50270379		0000					TTCGAT_0.227_-_-171	TTCCGCC_0.959_+_133		AAATA_1.000_+_-110
AP2A2	uc001lst.2	chr11:925808	+	chr11:925608-926008		0000			G2/M									G2/M
AP2B1	uc010wci.2	chr17:33914281	+	chr17:33914081-33914481	6.32	0001			G2/M								M/G1	G2/M
AP2M1	uc021xif.1	chr3:183892633	+	chr3:183892433-183892833		0000				TTTGTA_0.999_+_-51	TTTGTA_0.999_+_-51 TTCGAG_0.846_-_-134								TTTGTA_0.999_+_-51
AP2S1	uc002pft.1	chr19:47354203	-	chr19:47354023-47354403		0000	1
AP3B1	uc003kfj.3	chr5:77590528	-	chr5:77590403-77590728		0000
AP3B2	uc010uok.1	chr15:83378635	-	chr15:83378458-83378835		0000														CGCCGG_0.382_+_-31_CTTAAA_0.950_-_-21 CGCCGG_0.382_+_-31_TTTAAG_0.950_+_-21 CGCGGC_0.093_+_-6_ATTGAG_0.986_+_4 CGGCCC_0.206_+_-4_TGAGAA_0.993_+_6 GCGCCG_0.288_+_-32_CTTTAA_0.958_+_-22 GCGGCC_0.146_+_-5_TCTCAA_0.992_-_5
AP3D1	uc002luy.3	chr19:2151556	-	chr19:2151356-2151756		0000			G2			TTCCGGG_0.951_+_-58			G2
AP3M1	uc010qla.2	chr10:75910826	-	chr10:75910626-75911026		0000
AP3M2	uc003xop.3	chr8:42010463	+	chr8:42010263-42010663		0000			G1/S							G1/S		S
AP3S1	uc003krk.3	chr5:115177618	+	chr5:115177418-115177734	8.04	0101
AP4B1	uc010owq.2	chr1:114447525	-	chr1:114447339-114447725	11.68	1011			G1/S						G1/S
AP4E1	uc001zyx.2	chr15:51200868	+	chr15:51200668-51200975		0000				TTTGAA_0.946_-_-2	TTTGAA_0.946_-_-2			AAACA_0.982_+_4					TTTGAA_0.946_-_-2	GGCGGC_0.002_+_39_CATGAA_0.973_+_49
AP4M1	uc003utd.3	chr7:99699129	+	chr7:99698929-99699329	13.905	1111						TTCCCGC_0.999_+_72 TTGGCGC_1.000_+_-110
AP4S1	uc021rry.1	chr14:31494311	+	chr14:31494111-31494511		0000
APAF1	uc001tfy.3	chr12:99039077	+	chr12:99038877-99039277	8.22	0011
APBA1	uc004ahh.2	chr9:72287275	-	chr9:72287075-72287475		0000
APBA2	uc001zck.3	chr15:29213842	+	chr15:29213642-29214042		0000
APBA3	uc002lyp.1	chr19:3761673	-	chr19:3761473-3761873		0000					TTCGAA_0.244_+_-123
APBB1	uc001mdc.1	chr11:6440644	-	chr11:6440444-6440844		0000
APBB1IP	uc001iss.3	chr10:26727265	+	chr10:26727065-26727465		0000
APBB2	uc003gvl.3	chr4:41216635	-	chr4:41216435-41216835		0000			G2/M	TAGGAA_1.000_+_103	TAGGAA_1.000_+_103		CAACTG_0.970_-_74			G2/M
APBB3	uc003lgd.1	chr5:139944189	-	chr5:139943989-139944389		0000			S-phase									S
APC	uc003kpy.4	chr5:112073555	+	chr5:112073355-112073755		0000
APC2	uc002lss.1	chr19:1450147	+	chr19:1449947-1450347		0000			G1/S			TTCCCGC_0.940_+_-86						G1/S
APCDD1	uc002kom.4	chr18:10454624	+	chr18:10454424-10454824		0000
APCDD1L	uc010zzp.1	chr20:57089949	-	chr20:57089763-57090149		0000
APCS	uc001ftv.3	chr1:159557615	+	chr1:159557415-159557711		0000								AAATA_0.938_+_-154
APEH	uc003cxf.3	chr3:49711434	+	chr3:49711234-49711634		0000
APEX1	uc001vxg.3	chr14:20923289	+	chr14:20923089-20923489		0000
APEX2	uc004dtz.3	chrX:55026779	+	chrX:55026579-55026855		0000			G1/S						G1/S
APH1A	uc010pbz.2	chr1:150241609	-	chr1:150241409-150241809	7.23	0010				TTTGTA_0.996_+_-139 CTTGAA_1.000_-_-193	CTTGAA_1.000_-_-193 TTTGAA_0.360_-_-120 TTTGTA_0.996_+_-139			AAATA_0.995_-_-135					TTTGTA_0.996_+_-139 CTTGAA_1.000_-_-193
APH1B	uc010bgq.3	chr15:63569748	+	chr15:63569548-63569822		0000
API5	uc001mxf.2	chr11:43333504	+	chr11:43333304-43333677		0000
APITD1-CORT	uc021ogd.1	chr1:10490158	+	chr1:10489958-10490358	11.5167	1011
APLF	uc010fdf.2	chr2:68694690	+	chr2:68694490-68694863	19.675	1111						TTCCGCC_0.986_-_118		AAACA_0.993_+_123
APLN	uc004eus.3	chrX:128788933	-	chrX:128788733-128789133		0000				TTTGTA_0.999_-_-30	TTTGTA_0.999_-_-30								TTTGTA_0.999_-_-30
APLNR	uc001njo.3	chr11:57004927	-	chr11:57004727-57005127		0000													TTTGAC_0.992_+_111
APLP1	uc002ocf.3	chr19:36359400	+	chr19:36359200-36359538		0000						TTCGCGC_0.967_-_-48 TTGCGCC_0.995_-_122
APLP2	uc021qsg.1	chr11:129940462	+	chr11:129940262-129940507		0000
APOA1	uc001ppv.1	chr11:116708338	-	chr11:116708138-116708538		0000				CTTGAA_1.000_+_-127	CTTGAA_1.000_+_-127			AAATA_0.991_+_-29 AAATA_0.997_-_-158 AAACA_1.000_-_-171					CTTGAA_1.000_+_-127
APOA1BP	uc001fpi.3	chr1:156561557	+	chr1:156561357-156561596		0000
APOA2	uc001fzc.1	chr1:161193418	-	chr1:161193218-161193618		0000
APOA4	uc001pps.1	chr11:116694011	-	chr11:116693907-116694211		0000				TTTAAA_0.987_+_-42	TTTAAA_0.987_+_-42								TTTAAA_0.987_+_-42 TTTAAA_0.987_-_-42
APOA5	uc009yzf.3	chr11:116663136	-	chr11:116662936-116663336		0000				TTTGAA_1.000_+_-63	TTTGAA_1.000_+_-63			AAATA_1.000_-_-46					TTTGAA_1.000_+_-63
APOB	uc002red.3	chr2:21266945	-	chr2:21266817-21267145		0000					TAGGAA_0.531_-_-34			AAACA_1.000_+_-100					TTTGCA_0.988_+_-65 TTTGGA_1.000_+_-74
APOBEC1	uc001qtc.3	chr12:7818502	-	chr12:7818468-7818702		0000
APOBEC2	uc003opl.3	chr6:41020939	+	chr6:41020739-41021086		0000								AAATA_0.999_+_-141					TTTTAA_1.000_-_-79
APOBEC3B	uc003awo.1	chr22:39378404	+	chr22:39378204-39378458	18.645	1111			M/G1								M/G1
APOBEC3C	uc003awr.3	chr22:39410264	+	chr22:39410064-39410367	7.155	0011			S-phase									S
APOBEC3D	uc021wpq.1	chr22:39417117	+	chr22:39416917-39417317	10.7933	1011
APOBEC3F	uc003awv.3	chr22:39436672	+	chr22:39436472-39436872		0000			S-phase									S
APOBEC3H	uc021wpv.1	chr22:39493228	+	chr22:39493028-39493428		0000
APOBEC4	uc001gqn.3	chr1:183622448	-	chr1:183622248-183622648		0000								AAATA_0.979_+_-76 AAATA_1.000_-_-110					TTTGCA_0.998_-_-30 TTTGCA_1.000_+_-32 TTAGAA_0.990_-_35 TTTGCA_1.000_-_-79 TTGGAA_0.998_+_-99 TTTGGA_0.998_+_-100
APOBR	uc010byg.2	chr16:28505969	+	chr16:28505769-28506002		0000
APOC1	uc002pae.1	chr19:45417920	+	chr19:45417720-45418120		0000
APOC3	uc001ppt.1	chr11:116700623	+	chr11:116700423-116700823		0000								AAACA_0.996_+_-26
APOD	uc011bsx.1	chr3:195311076	-	chr3:195310876-195311276		0000					TTCGAT_0.180_+_136 TTTGAA_0.362_+_-143			AAACA_1.000_-_-49 AAATA_1.000_+_-159					TTTGGA_0.998_+_-46 TTAGAA_0.986_+_-78 TGTGAA_1.000_+_86
APOE	uc002pab.3	chr19:45409038	+	chr19:45408838-45409238		0000
APOF	uc001sle.1	chr12:56756583	-	chr12:56756529-56756783		0000								AAATA_0.948_+_-78					TTTGCA_0.997_+_-73
APOH	uc002jfn.4	chr17:64225556	-	chr17:64225497-64225756		0000					TTTGTA_0.492_-_-55			AAACA_0.985_-_-22					TATGAA_0.988_-_-145
APOL1	uc011amp.2	chr22:36649116	+	chr22:36648916-36649316		0000
APOL2	uc003apa.3	chr22:36636000	-	chr22:36635800-36636200		0000
APOL3	uc003aor.3	chr22:36556977	-	chr22:36556939-36557177		0000
APOL4	uc003aox.3	chr22:36600879	-	chr22:36600679-36601079		0000
APOL5	uc003aof.3	chr22:36113918	+	chr22:36113718-36113918		0000
APOL6	uc003aoe.3	chr22:36044423	+	chr22:36044223-36044623		0000			G1/S									G1/S
APOLD1	uc001rav.3	chr12:12878850	+	chr12:12878650-12878934	7.11	1010	1	1		TTTGAA_1.000_+_-176	TTTGAA_1.000_+_-176			AAACA_1.000_-_-149					TTTGAA_1.000_+_-176
APOM	uc003nvl.3	chr6:31623670	+	chr6:31623470-31623743		0000							TAACTG_0.905_-_33	AAACA_1.000_+_-66					GTTGAA_0.998_+_-59 TTGGAA_0.961_+_-71
APOO	uc004dax.3	chrX:23926057	-	chrX:23925857-23926257		0000
APOOL	uc004eem.3	chrX:84258897	+	chrX:84258697-84258918		0000
APP	uc011acj.2	chr21:27543138	-	chr21:27542938-27543338		0000						TTCCCCG_1.000_+_-53
APPBP2	uc002iys.1	chr17:58603580	-	chr17:58603380-58603780		0000			M/G1		TTCGAG_0.106_-_31							M/G1		GCCCCG_0.994_+_-15_TCTGCA_0.961_-_-5	GCCCCG_0.994_+_-15_TCTGCA_0.961_-_-5
APPL1	uc011bey.1	chr3:57261764	+	chr3:57261564-57261911		0000						TTCCCGC_0.993_+_-12
APPL2	uc001tlf.1	chr12:105630008	-	chr12:105629808-105630208		0000
APRT	uc002flv.3	chr16:88878342	-	chr16:88878307-88878542		0000
APTX	uc003zry.3	chr9:33001639	-	chr9:33001602-33001839		0000						TTCCGGC_0.989_-_15
AQP10	uc001feu.3	chr1:154293591	+	chr1:154293391-154293631		0000				TTTAAA_1.000_+_-65	TTTAAA_1.000_+_-65								TTTAAA_1.000_+_-65 TTTAAA_1.000_-_-65 TTTTAA_1.000_+_-66
AQP11	uc001oyj.3	chr11:77300679	+	chr11:77300479-77300879		0000
AQP12A	uc002vzu.3	chr2:241631261	+	chr2:241631061-241631330		0000
AQP12B	uc010fzj.3	chr2:241622317	-	chr2:241622254-241622517		0000
AQP2	uc001rvn.3	chr12:50344523	+	chr12:50344323-50344613		0000													TGTGAA_1.000_+_-174
AQP3	uc003zsv.2	chr9:33447631	-	chr9:33447528-33447831		0000
AQP4	uc002kwa.3	chr18:24445716	-	chr18:24445653-24445916		0000				TTTGAA_1.000_-_-90 CTTGAA_1.000_-_-96	TTTGAA_1.000_-_-90 CTTGAA_1.000_-_-96 TTTGAG_0.517_-_-178			AAATA_1.000_+_-87					TTTGGA_1.000_-_-35 TTTGAA_1.000_-_-90 CTTGAA_1.000_-_-96
AQP5	uc001rvo.2	chr12:50355278	+	chr12:50355078-50355478		0000
AQP6	uc001rvr.1	chr12:50366263	+	chr12:50366063-50366463		0000
AQP7	uc003zst.3	chr9:33402517	-	chr9:33402317-33402717		0000								AAATA_0.999_-_-122					TCTGAA_0.984_-_-167
AQP8	uc002doc.3	chr16:25228284	+	chr16:25228084-25228366		0000				TTTAAA_0.951_+_-46	TTTAAA_0.951_+_-46								TTTTAA_0.972_-_-45 TTTAAA_0.951_+_-46 TTTAAA_0.951_-_-46
AQP9	uc002aez.2	chr15:58430407	+	chr15:58430207-58430607		0000					CTTGAA_0.499_+_31									GGCCCG_0.786_+_-20_TGTGAT_0.994_+_-10
AQR	uc001ziv.3	chr15:35261995	-	chr15:35261814-35262195		0000
AR	uc004dwu.2	chrX:66763873	+	chrX:66763673-66764073		0000					TTCGAA_0.837_+_188								TTTGGA_0.937_-_-161
ARAF	uc011mlp.2	chrX:47420515	+	chrX:47420315-47420715		0000						TTGGGCC_1.000_-_95		AAACA_0.998_+_82
ARAP1	uc001osu.3	chr11:72463434	-	chr11:72463234-72463634		0000					TTTGAG_0.178_-_51	TTCCGCC_1.000_-_-59 TTCCCCG_0.962_+_167
ARAP2	uc003gsq.2	chr4:36245979	-	chr4:36245779-36246179		0000
ARAP3	uc003llm.3	chr5:141061800	-	chr5:141061600-141062000		0000
ARC	uc003ywn.1	chr8:143695833	-	chr8:143695633-143696033		0000
ARCN1	uc010ryg.2	chr11:118443101	+	chr11:118442901-118443262		0000													GTTGAA_0.998_+_-2 TTTGAC_0.999_+_-22
AREG	uc021xpc.1	chr4:75310852	+	chr4:75310652-75311052		0000			S-phase			TTGCCCC_0.929_+_172						S
ARF1	uc001hrs.3	chr1:228270360	+	chr1:228270160-228270560		0000
ARF3	uc010smc.1	chr12:49351252	-	chr12:49351052-49351452		0000
ARF4	uc003dix.4	chr3:57583215	-	chr3:57583015-57583415		0000
ARF5	uc010llb.2	chr7:127228405	+	chr7:127228205-127228552		0000														GGCCGG_0.999_+_88_CTGGAA_1.000_-_98	GGCCGG_0.999_+_88_CTGGAA_1.000_-_98
ARF6	uc001wxg.4	chr14:50359735	+	chr14:50359535-50359935		0000		1				TTCCGGC_0.998_+_63								TGGGCC_0.077_+_150_TTTCCA_0.903_-_160
ARFGAP1	uc002yel.3	chr20:61904164	+	chr20:61903964-61904364		0000						TTCCGGC_0.998_-_-2 TTCCGCC_0.901_-_-55
ARFGAP2	uc010rhc.2	chr11:47198676	-	chr11:47198476-47198876		0000
ARFGAP3	uc003bdd.2	chr22:43253408	-	chr22:43253208-43253608		0000
ARFGEF1	uc003xxo.2	chr8:68255912	-	chr8:68255712-68256112		0000						TTCGGCC_1.000_+_-127
ARFGEF2	uc002xtx.4	chr20:47538274	+	chr20:47538074-47538426		0000
ARFIP1	uc003inb.3	chr4:153701111	+	chr4:153700911-153701311		0000						TTCCGGC_0.999_+_3
ARFIP2	uc001mdk.3	chr11:6502709	-	chr11:6502509-6502746		0000						TTCCGGG_0.999_-_15 TTCCGCC_1.000_+_140
ARFRP1	uc002ygh.4	chr20:62339355	-	chr20:62339155-62339555		0000
ARG1	uc003qco.2	chr6:131894343	+	chr6:131894143-131894422		0000
ARG2	uc001xjs.3	chr14:68086578	+	chr14:68086378-68086694		0000
ARGFX	uc003eef.3	chr3:121286777	+	chr3:121286577-121286977		0000					TAGGAA_0.113_+_-192 TTTAAA_0.136_+_-24
ARGLU1	uc001vqk.4	chr13:107220514	-	chr13:107220314-107220714		0000			G1/S						G1/S	G1/S
ARHGAP1	uc009yle.1	chr11:46722120	-	chr11:46721920-46722320		0000						TTCCGCC_1.000_-_-96		AAACA_1.000_-_-31
ARHGAP10	uc003ilf.3	chr4:148653452	+	chr4:148653252-148653452		0000			G2/M							G2/M
ARHGAP11A	uc001zgw.3	chr15:32907690	+	chr15:32907490-32907890	19.21	1111		1	G2/M	TTTGAA_1.000_+_-65	TTTGAG_0.806_+_-13 TTTGAA_1.000_+_-65	TTCGCGC_0.943_+_-25				G2/M	G2/M	G2	TTTCAA_1.000_-_-64 TTTGAA_1.000_+_-65
ARHGAP11B	uc001zet.1	chr15:30918878	+	chr15:30918678-30919023	21.23	1111		1	G2		TTTGAA_0.304_-_54 TTTGAG_0.478_+_60	TTCCGGC_0.914_-_32			G2	G2/M			TTGGAA_0.933_+_78
ARHGAP12	uc009xlr.1	chr10:32217770	-	chr10:32217570-32217970		0000
ARHGAP15	uc002tvm.4	chr2:143886898	+	chr2:143886698-143887098		0000				TTTAAA_0.998_+_-45 TTTGAA_0.925_-_-106	TTTAAA_0.998_+_-45 TTTGAA_0.925_-_-106		TAACTG_0.972_+_-74 TAACTG_0.993_-_89	AAATA_1.000_-_-47 AAACA_1.000_-_58					TTTTAA_0.989_-_-44 TTTAAA_0.998_+_-45 TTTAAA_0.998_-_-45 GTTGAA_1.000_+_72 TTTCAA_1.000_-_73 TTTGAA_0.925_-_-106 TTTCAA_0.981_+_109 ATTGAA_0.977_-_110	TCCCCC_0.002_+_-5_TTTCAG_0.999_-_5
ARHGAP17	uc002dnc.3	chr16:25026675	-	chr16:25026582-25026875		0000			G2							G2
ARHGAP18	uc011ebw.2	chr6:130031370	-	chr6:130031281-130031570		0000			S-phase							S-phase
ARHGAP19	uc001knb.3	chr10:99052430	-	chr10:99052384-99052630		0000	1		G2	TTTGAA_0.995_+_-107	TTTGAA_0.995_+_-107				G2	M/G1	G2/M	G2	TTTGAA_0.995_+_-107
ARHGAP20	uc009yyb.1	chr11:110583451	-	chr11:110583251-110583651		0000
ARHGAP21	uc001isb.2	chr10:25012597	-	chr10:25012397-25012797		0000
ARHGAP22	uc010qgl.2	chr10:49813138	-	chr10:49812938-49813338		0000								AAATA_0.999_+_89
ARHGAP23	uc021twd.1	chr17:36584719	+	chr17:36584519-36584729		0000
ARHGAP24	uc003hpi.1	chr4:86396283	+	chr4:86396083-86396483		0000						TTGGCCC_0.994_+_-43	CAACTG_1.000_-_-32 CAACTG_1.000_+_46 CAACTG_1.000_-_-86	AAATA_0.999_-_-6					TGTGAA_0.999_-_4 TTAGAA_1.000_-_22 TCTGAA_0.999_+_-70
ARHGAP25	uc010fdg.3	chr2:68961912	+	chr2:68961712-68962112		0000			G2/M	TTTGAG_1.000_-_-37	TTTGAG_1.000_-_-37 TTCGAA_0.245_+_73		TAACTG_0.994_-_-17 CAACTG_0.969_+_115	AAACA_0.999_-_34 AAATA_0.999_-_124				G2/M	TTTGAG_1.000_-_-37
ARHGAP26	uc011dbj.2	chr5:142150291	+	chr5:142150091-142150326		0000			M/G1							M/G1
ARHGAP27	uc002iix.3	chr17:43503012	-	chr17:43502812-43503212		0000
ARHGAP27	uc010dal.3	chr17:43511112	-	chr17:43510912-43511312		0000					TTTGTA_0.124_-_113
ARHGAP28	uc010wzi.2	chr18:6834431	+	chr18:6834231-6834631		0000			S-phase							S-phase
ARHGAP29	uc001dqj.4	chr1:94703307	-	chr1:94703107-94703507		0000
ARHGAP30	uc001fxn.1	chr1:161039760	-	chr1:161039560-161039960		0000													TTTGCA_1.000_-_-2 TGTGAA_1.000_+_-42 GTTGAA_0.994_-_142
ARHGAP31	uc003ecj.4	chr3:119013219	+	chr3:119013019-119013419		0000				TTTGTA_1.000_+_-10	TTTGTA_1.000_+_-10								TTTGTA_1.000_+_-10
ARHGAP32	uc009zcp.3	chr11:129062093	-	chr11:129062093-129062293		0000			G2							G2
ARHGAP33	uc002obs.2	chr19:36266416	+	chr19:36266216-36266560		0000					TTCGAG_0.756_+_-165		TAACGG_1.000_-_9						TTTGAC_1.000_-_-172
ARHGAP35	uc010ekv.3	chr19:47421932	+	chr19:47421732-47421932		0000				TAGGAA_0.953_+_-190	TAGGAA_0.953_+_-190
ARHGAP36	uc004ewa.3	chrX:130192215	+	chrX:130192015-130192360		0000						TTGCCCC_0.984_-_-78
ARHGAP39	uc003zdt.1	chr8:145838888	-	chr8:145838688-145839088		0000					TTTGAG_0.137_-_-138 TTTGTA_0.183_-_-153 TTTGAG_0.156_-_-165
ARHGAP4	uc004fjl.2	chrX:153191714	-	chrX:153191656-153191914		0000
ARHGAP40	uc021wdn.1	chr20:37230576	+	chr20:37230376-37230585		0000
ARHGAP42	uc001pge.2	chr11:100558406	+	chr11:100558206-100558409		0000
ARHGAP44	uc002gns.4	chr17:12692828	+	chr17:12692628-12693028		0000														GGCGCG_0.002_+_-87_CTTGTA_1.000_-_-77
ARHGAP5	uc001wrm.3	chr14:32546494	+	chr14:32546294-32546571		0000
ARHGAP6	uc004cup.1	chrX:11683821	-	chrX:11683621-11684021		0000
ARHGAP9	uc010sro.1	chr12:57873633	-	chr12:57873571-57873833		0000
ARHGDIA	uc021ufg.1	chr17:79829282	-	chr17:79829082-79829482		0000						TTCCGGG_0.999_-_17
ARHGDIB	uc001rcq.1	chr12:15114562	-	chr12:15114362-15114762		0000			G2/M	TTTGAG_1.000_+_-53	CTTGAA_0.890_-_-29 TTTGAG_1.000_+_-53 TTTGAA_0.775_-_96		TAACTG_1.000_+_21		G2/M				TTAGAA_1.000_-_18 TTTGAG_1.000_+_-53
ARHGDIG	uc002cgm.1	chr16:330605	+	chr16:330405-330680		0000
ARHGEF1	uc002osa.3	chr19:42388445	+	chr19:42388245-42388534		0000
ARHGEF10	uc003wps.3	chr8:1772148	+	chr8:1771948-1772348		0000			M/G1	TTCGAG_0.980_-_-187	TTCGAG_0.980_-_-187							M/G1
ARHGEF10L	uc009vpe.1	chr1:17866329	+	chr1:17866129-17866529		0000
ARHGEF11	uc001fqn.3	chr1:157015162	-	chr1:157014962-157015362		0000					TTTAAA_0.900_+_162								TCTGAA_0.981_-_95 TCTGAA_0.985_-_192
ARHGEF12	uc021qrm.1	chr11:120207617	+	chr11:120207417-120207817		0000						TTGGCCG_0.984_-_-152
ARHGEF15	uc002glb.2	chr17:8213555	+	chr17:8213355-8213755		0000														GGGCCC_0.781_+_-16_TGGGAA_0.915_-_-6
ARHGEF16	uc001akg.4	chr1:3371146	+	chr1:3370946-3371346		0000
ARHGEF17	uc001otu.3	chr11:73019662	+	chr11:73019462-73019683		0000
ARHGEF18	uc002mgi.3	chr19:7504573	+	chr19:7504373-7504773		0000
ARHGEF19	uc001ayc.1	chr1:16539104	-	chr1:16538904-16539304		0000			G1/S									G1/S
ARHGEF2	uc001fmt.2	chr1:155948336	-	chr1:155948218-155948536		0000			M/G1	TTTGAG_1.000_+_-36	TTTGAG_1.000_+_-36	TTCCCCC_0.965_+_54				M/G1			TTTGAG_1.000_+_-36
ARHGEF25	uc009zpy.3	chr12:58003962	+	chr12:58003762-58003999		0000				TTTGAG_0.999_-_-26	TTTGAG_0.999_-_-26			AAACA_0.976_+_-129 AAACA_0.994_-_-162					TTTGAG_0.999_-_-26	GCCCCC_1.000_+_-20_ACTGAA_1.000_-_-10	GCCCCC_1.000_+_-20_ACTGAA_1.000_-_-10
ARHGEF26	uc021xgc.1	chr3:153838791	+	chr3:153838591-153838991		0000
ARHGEF3	uc003dih.2	chr3:57113336	-	chr3:57113136-57113536		0000
ARHGEF33	uc021vgd.1	chr2:39146503	+	chr2:39146303-39146588		0000					TTTGAA_0.351_+_-12								GTTGAA_0.961_+_48
ARHGEF37	uc003lra.1	chr5:148961134	+	chr5:148960934-148961334		0000								AAACA_0.954_+_-187
ARHGEF38	uc003hxv.2	chr4:106473776	+	chr4:106473576-106473922		0000								AAACA_0.999_-_-159
ARHGEF4	uc002trz.1	chr2:131672785	+	chr2:131672585-131672985		0000
ARHGEF40	uc001vzp.3	chr14:21538526	+	chr14:21538326-21538555		0000
ARHGEF5	uc003wek.3	chr7:144052488	+	chr7:144052288-144052688		0000				TAGGAA_0.926_-_-50	TAGGAA_0.926_-_-50	TTCCCGG_0.997_-_-85		AAACA_0.991_-_-68
ARHGEF6	uc004fab.3	chrX:135863503	-	chrX:135863303-135863703		0000							CAACTG_1.000_-_-91	AAACA_1.000_-_36 AAATA_1.000_-_-41					TTGGAA_1.000_-_4
ARHGEF7	uc001vrt.2	chr13:111767623	+	chr13:111767423-111767823		0000						TTGGGCG_0.999_+_-9
ARHGEF9	uc011mot.2	chrX:63005426	-	chrX:63005226-63005626		0000													TTTGGA_0.910_+_-57
ARID1A	uc001bmu.1	chr1:27022521	+	chr1:27022321-27022721		0000						TTGGGGG_1.000_+_79								GCCCCC_1.000_+_54_TGGGAA_0.997_-_64	GCCCCC_1.000_+_54_TGGGAA_0.997_-_64
ARID1B	uc003qqo.3	chr6:157099063	+	chr6:157098863-157099063		0000						TTCGCCG_0.976_-_-183								GCGGCG_0.986_+_-58_CCTGAA_0.971_+_-48	GCGGCG_0.986_+_-58_CCTGAA_0.971_+_-48
ARID2	uc001ros.1	chr12:46123619	+	chr12:46123419-46123619		0000				TTTGAA_0.937_+_-11 TTTAAA_0.963_+_-46 TAGGAA_0.996_+_-73	TAGGAA_0.996_+_-73 TTTGAA_0.937_+_-11 TTTAAA_0.643_+_-24 TTTAAA_0.963_+_-46			AAATA_0.990_+_-4 AAACA_0.946_+_-42					TTTCAA_0.938_-_-10 TTTGAA_0.937_+_-11 TTTTAA_0.957_-_-45 TTTAAA_0.963_+_-46 TTTAAA_0.963_-_-46 TTTTAA_0.968_+_-47	CGGGGG_0.995_+_-57_TTAAAA_0.968_-_-47 GGGGGC_0.989_+_-55_TTAAAA_0.957_+_-45	CGGGGG_0.995_+_-57_TTAAAA_0.968_-_-47 GGGGGC_0.989_+_-55_TTAAAA_0.957_+_-45
ARID3A	uc002lql.3	chr19:926036	+	chr19:925836-926236		0000								AAATA_0.999_-_-114					TTTGCA_0.999_+_-112	GGGCCG_0.997_+_-142_GCTGAA_1.000_+_-132	GGGCCG_0.997_+_-142_GCTGAA_1.000_+_-132
ARID3B	uc002aye.3	chr15:74833547	+	chr15:74833347-74833747	19.7225	1111			G2			TTCCGGC_0.937_+_-86						G2
ARID3C	uc011lon.2	chr9:34628011	-	chr9:34628011-34628211		0000
ARID4A	uc001xdo.3	chr14:58765221	+	chr14:58765021-58765421		0000						TTCGGCG_1.000_+_-17	CAACTG_0.980_-_192	AAATA_1.000_-_43 AAACA_0.965_-_-95					TGTGAA_0.949_-_-70
ARID4B	uc001hws.4	chr1:235491532	-	chr1:235491332-235491732		0000				TTTGTA_0.996_+_-132	TAGGAA_0.274_+_-114 TTTGTA_0.996_+_-132	TTCCCCC_0.989_-_25 TTGCCCG_1.000_+_39 TTCCCGG_0.999_-_-50 TTCGGCG_0.974_-_75 TTGCCGC_0.998_+_108 TTGCCCG_0.997_+_138		AAACA_1.000_-_36 AAACA_1.000_-_-134 AAACA_1.000_-_-168 AAATA_0.987_-_-200					TTTGTA_0.996_+_-132	GCCGCC_0.893_+_168_TCTGGA_1.000_+_178
ARID5A	uc002swe.3	chr2:97202463	+	chr2:97202263-97202563		0000														GGGCGC_0.003_+_-145_ATTGTA_1.000_-_-135
ARID5B	uc010qil.2	chr10:63661012	+	chr10:63660812-63661212		0000			S-phase	TTTGAT_1.000_-_-122 TTCGAG_1.000_-_-158 TTTGAT_1.000_-_-185	TTTGAT_1.000_-_-185 TTTGAT_1.000_-_-122 TTTGTA_0.205_-_126 TTCGAG_1.000_-_-158	TTCCGGG_1.000_-_-56 TTCCCGC_0.999_+_166		AAACA_1.000_+_-119 AAATA_0.998_-_120 AAACA_1.000_+_-153 AAATA_1.000_+_-193		S-phase			TTTGGA_0.995_-_35 TTAGAA_1.000_+_-75 TTTGAT_1.000_-_-122 TTTGAT_1.000_-_-185	CCCCGG_1.000_+_-57_TCTGCA_1.000_+_-47	CCCCGG_1.000_+_-57_TCTGCA_1.000_+_-47
ARIH1	uc002aut.4	chr15:72766666	+	chr15:72766466-72766866		0000								AAACA_0.964_-_44
ARL1	uc001tib.3	chr12:101801572	-	chr12:101801423-101801772		0000					TTTAAA_0.340_+_-185
ARL10	uc003mec.1	chr5:175792501	+	chr5:175792301-175792566		0000
ARL11	uc001vdf.2	chr13:50202434	+	chr13:50202234-50202634		0000
ARL13A	uc004ego.3	chrX:100224696	+	chrX:100224496-100224896		0000
ARL13B	uc003drf.3	chr3:93698982	+	chr3:93698782-93699182	8.63667	1011
ARL14	uc003fdq.3	chr3:160394947	+	chr3:160394747-160395134		0000			G1/S		TAGGAA_0.382_-_74 TTTGAG_0.880_+_-95			AAACA_0.987_-_-19				G1/S
ARL15	uc003jpg.1	chr5:53606403	-	chr5:53606309-53606603		0000						TTCCGGG_1.000_+_53		AAATA_1.000_-_-11						CCGCGC_1.000_+_-54_TGTGTA_0.999_+_-44 GGGGCC_0.595_+_-127_TTTTAT_0.999_+_-117	CCGCGC_1.000_+_-54_TGTGTA_0.999_+_-44
ARL16	uc002kbf.3	chr17:79650954	-	chr17:79650855-79651096	7.46	0010
ARL17A	uc010wkd.1	chr17:44657088	-	chr17:44656888-44657288	7.52	0010					TTTGAA_0.326_+_-150
ARL17B	uc002ikk.3	chr17:44439163	-	chr17:44438963-44439363		0000				TTTGAA_0.996_+_-150	TTTGAA_0.996_+_-150								TTTGAA_0.996_+_-150
ARL2	uc021qlc.1	chr11:64781584	+	chr11:64781384-64781679		0000
ARL2BP	uc002elf.1	chr16:57279037	+	chr16:57278837-57279237		0000
ARL3	uc001kwa.3	chr10:104474190	-	chr10:104474032-104474390		0000						TTGCCCC_1.000_+_96	CAACTG_1.000_-_93 TAACGG_1.000_+_106
ARL4A	uc003ssp.3	chr7:12726451	+	chr7:12726251-12726651		0000		1	G2					AAACA_0.966_-_-43		G2		G2
ARL4C	uc002vvn.3	chr2:235405693	-	chr2:235405493-235405893		0000
ARL4D	uc002idt.3	chr17:41476352	+	chr17:41476152-41476552		0000
ARL5A	uc002txv.1	chr2:152685009	-	chr2:152684809-152685209		0000						TTGCGCG_0.955_+_135 TTCGGCC_0.977_+_160
ARL5B	uc001iqd.1	chr10:18948312	+	chr10:18948112-18948512		0000			G1/S		TTCGAG_0.797_-_54	TTCCGGC_0.999_+_-77		AAACA_0.943_+_58				G1/S
ARL5C	uc010wea.2	chr17:37322414	-	chr17:37322214-37322614		0000
ARL6	uc003drv.3	chr3:97483594	+	chr3:97483394-97483794		0000
ARL6IP1	uc002dfl.1	chr16:18812857	-	chr16:18812788-18813057	8.895	1111		1	G2/M	CTTGAA_1.000_-_-152	CTTGAA_1.000_-_-152				G2/M	M/G1		G2/M	CTTGAA_1.000_-_-152 TTTCAA_1.000_+_-153 TTTGAC_1.000_+_-164
ARL6IP4	uc001uee.3	chr12:123464879	+	chr12:123464679-123464934		0000
ARL6IP5	uc003dnr.3	chr3:69134089	+	chr3:69133889-69134198		0000														GCCGCC_0.837_+_70_TCTGGA_0.955_+_80
ARL6IP6	uc002tyn.3	chr2:153574406	+	chr2:153574206-153574606		0000			G1/S							G1/S		G1/S
ARL8A	uc001gxk.1	chr1:202113866	-	chr1:202113700-202114066		0000						TTCCGGG_0.950_+_7
ARL8B	uc011asy.2	chr3:5163929	+	chr3:5163729-5164129		0000			G2				CAACGG_0.996_-_127					G2
ARL9	uc003hby.1	chr4:57371374	+	chr4:57371174-57371574		0000					TTTGTA_0.232_-_-198
ARMC1	uc003xvl.3	chr8:66546452	-	chr8:66546252-66546652	8.995	0011	1		G2						G2
ARMC10	uc003vax.2	chr7:102715327	+	chr7:102715127-102715527		0000				CTTGAA_1.000_+_-157	CTTGAA_1.000_+_-157								CTTGAA_1.000_+_-157
ARMC12	uc003ola.3	chr6:35704858	+	chr6:35704658-35704885		0000
ARMC2	uc003pss.4	chr6:109169618	+	chr6:109169418-109169818		0000
ARMC3	uc001irm.4	chr10:23216953	+	chr10:23216753-23217153		0000
ARMC4	uc001itz.3	chr10:28287977	-	chr10:28287777-28288177		0000			S-phase									S
ARMC5	uc002ecc.3	chr16:31470316	+	chr16:31470297-31470516		0000
ARMC6	uc002nlc.3	chr19:19144386	+	chr19:19144328-19144586		0000							CAACGG_1.000_+_-47
ARMC7	uc002jmw.1	chr17:73106081	+	chr17:73105881-73106281		0000			G2/M									G2/M
ARMC8	uc011bmh.1	chr3:137906147	+	chr3:137905947-137906347		0000					TTTGAA_0.504_-_-190			AAACA_0.928_-_30
ARMC9	uc002vrq.4	chr2:232063341	+	chr2:232063141-232063541		0000						TTGCCCG_0.989_+_2
ARMCX1	uc004ehw.3	chrX:100805513	+	chrX:100805313-100805713		0000
ARMCX2	uc004eig.3	chrX:100914863	-	chrX:100914663-100915063		0000
ARMCX3	uc004ehz.1	chrX:100878119	+	chrX:100877919-100878319		0000								AAACA_0.993_+_-153
ARMCX5	uc022cba.1	chrX:101854425	+	chrX:101854225-101854625		0000
ARMCX5-GPRASP2	uc022cay.1	chrX:101854275	+	chrX:101854075-101854475		0000
ARMCX6	uc022can.1	chrX:100872991	-	chrX:100872791-100873191		0000						TTGGGGG_1.000_+_-34
ARMS2	uc001lgi.3	chr10:124214178	+	chr10:124213978-124214243		0000
ARNT	uc010pcl.2	chr1:150849244	-	chr1:150849044-150849444		0000						TTCCGCG_1.000_+_65
ARNT2	uc002bfr.3	chr15:80696691	+	chr15:80696491-80696857	5.71	0010														CGCGCC_0.864_+_43_TTTGTG_0.999_+_53
ARNTL	uc001mkp.3	chr11:13299324	+	chr11:13299124-13299524		0000			G2			TTCCCCG_1.000_-_-72 TTCCCGC_0.963_-_-119		AAACA_1.000_-_64		G2
ARNTL2	uc001rhv.2	chr12:27485786	+	chr12:27485586-27485986		0000
ARPC1A	uc003upx.2	chr7:98923495	+	chr7:98923295-98923695		0000						TTCCGGG_0.973_+_3 TTCGCGG_1.000_-_87
ARPC1B	uc003upz.3	chr7:98972297	+	chr7:98972097-98972497		0000						TTCGGCG_0.996_+_64
ARPC2	uc002vhd.3	chr2:219081873	+	chr2:219081673-219082073		0000
ARPC3	uc001tqq.3	chr12:110888158	-	chr12:110888065-110888358		0000						TTCCGCC_0.999_+_2
ARPC5	uc001gql.3	chr1:183604985	-	chr1:183604794-183605185		0000														TCGGCG_0.912_+_68_TCTGAG_1.000_-_78	TCGGCG_0.912_+_68_TCTGAG_1.000_-_78
ARPC5L	uc004bpa.4	chr9:127631483	+	chr9:127631283-127631569		0000			G1/S			TTCCCGC_1.000_+_-4						G1/S
ARPM1	uc003ffs.2	chr3:169487683	-	chr3:169487483-169487883		0000					TTTAAA_0.647_+_-157
ARPP19	uc002acd.1	chr15:52861213	-	chr15:52861089-52861413		0000				TTTGAA_0.981_+_-155	TTTGAA_0.981_+_-155								TTTGAA_0.981_+_-155	GCGGCG_0.999_+_-164_CTTCAA_0.968_-_-154	GCGGCG_0.999_+_-164_CTTCAA_0.968_-_-154
ARPP21	uc003cgb.3	chr3:35683848	+	chr3:35683648-35684048		0000							CAACTG_1.000_-_-137	AAATA_1.000_-_-48 AAATA_1.000_-_-60					TTTTAA_1.000_+_-57 TTTGCA_0.995_-_-178 TTTGCA_0.970_+_-180 TTAGAA_1.000_+_186
ARR3	uc004dyb.2	chrX:69488184	+	chrX:69487984-69488384		0000					TTTGAT_0.640_-_-57			AAATA_0.998_-_-121					TTTGGA_1.000_-_-143 TTGGAA_1.000_-_-144
ARRB1	uc001owe.2	chr11:75062875	-	chr11:75062675-75063075		0000
ARRB2	uc002fyj.3	chr17:4613788	+	chr17:4613588-4613988		0000					TTCGAT_0.497_-_-175	TTGGCGC_0.987_+_142
ARRDC3	uc003kjz.2	chr5:90679149	-	chr5:90678949-90679349		0000			G2	TTTGTA_1.000_+_17 TTTGTA_0.998_+_101	TTTGTA_1.000_+_17 TTTGTA_0.998_+_101			AAACA_1.000_-_-36 AAATA_1.000_-_99 AAATA_0.993_+_147		G2		G1/S	TTTGTA_1.000_+_17 TGTGAA_1.000_-_-31 TTTTAA_0.994_+_78 TTTGTA_0.998_+_101 TTTGCA_0.996_+_135	CCGCCC_0.990_+_8_TTACAA_1.000_-_18 CCGCCC_0.990_+_8_TTGTAA_1.000_+_18	CCGCCC_0.990_+_8_TTACAA_1.000_-_18 CCGCCC_0.990_+_8_TTGTAA_1.000_+_18
ARRDC4	uc010bom.3	chr15:98503932	+	chr15:98503732-98504091		0000						TTGGCGC_1.000_-_-130
ARRDC5	uc002mbm.3	chr19:4902879	-	chr19:4902879-4903079		0000
ARSA	uc010hbf.3	chr22:51066601	-	chr22:51066401-51066801		0000
ARSB	uc003kfq.3	chr5:78282357	-	chr5:78282157-78282557		0000
ARSD	uc004cqy.3	chrX:2847416	-	chrX:2847316-2847616		0000
ARSE	uc011mhh.2	chrX:2882494	-	chrX:2882294-2882694		0000
ARSF	uc022brz.1	chrX:2958274	+	chrX:2958074-2958474		0000					TTTGAA_0.153_-_-64
ARSG	uc002jhc.2	chr17:66255322	+	chr17:66255122-66255522		0000					TTCGAT_0.728_-_-80
ARSH	uc011mhj.2	chrX:2924653	+	chrX:2924453-2924653		0000
ARSI	uc003lrv.2	chr5:149682525	-	chr5:149682325-149682725		0000					TTCGAT_0.680_-_-117	TTGGGCG_0.997_-_85 TTCCCGG_0.995_-_182
ARSJ	uc003ibq.1	chr4:114900878	-	chr4:114900678-114901078	6.53	0010			G2/M			TTCCCGG_0.995_+_-43 TTCCGGG_0.906_-_-101						G2/M
ARSK	uc010jbg.3	chr5:94890824	+	chr5:94890624-94890982		0000				TTTGAT_0.982_+_-72	TTTGAT_0.982_+_-72			AAATA_0.996_-_-74					TTTGAT_0.982_+_-72
ART1	uc009yeb.1	chr11:3666360	+	chr11:3666160-3666560		0000				TTTGAT_0.932_-_-32	TTTGAT_0.932_-_-32			AAATA_1.000_+_-102					TTTGAT_0.932_-_-32
ART3	uc010ija.2	chr4:76995847	+	chr4:76995647-76996047		0000				TTTGAG_0.982_+_78 TTTAAA_1.000_+_-124	TTTGAG_0.982_+_78 TTTAAA_1.000_+_-124			AAACA_1.000_-_-18 AAATA_1.000_+_-71					TTTGAG_0.982_+_78 TTGGAA_1.000_-_-102 TTTAAA_1.000_+_-124 TTTAAA_1.000_-_-124	GGGGGC_1.000_+_-84_TATAAA_1.000_+_-74 GGGGGC_1.000_+_-84_TTTATA_1.000_-_-74 TGGGGG_0.999_+_-24_TATAAA_1.000_+_-14 TGGGGG_0.999_+_-24_TTTATA_1.000_-_-14	GGGGGC_1.000_+_-84_TATAAA_1.000_+_-74 GGGGGC_1.000_+_-84_TTTATA_1.000_-_-74 TGGGGG_0.999_+_-24_TATAAA_1.000_+_-14 TGGGGG_0.999_+_-24_TTTATA_1.000_-_-14
ART4	uc001rcm.1	chr12:14996413	-	chr12:14996213-14996613		0000
ART5	uc001lyb.1	chr11:3663485	-	chr11:3663285-3663685		0000					CTTGAA_0.751_-_72		TAACTG_0.998_-_-38
ARTN	uc001ckv.3	chr1:44398991	+	chr1:44398791-44399191		0000				TTTGTA_0.963_-_189	TTTGTA_0.963_-_189								TTTGTA_0.963_-_189
ARV1	uc001huh.3	chr1:231114822	+	chr1:231114622-231114851		0000
ARVCF	uc002zqz.3	chr22:20004309	-	chr22:20004109-20004509		0000
ARX	uc004dbp.4	chrX:25034065	-	chrX:25033865-25034265		0000
AS3MT	uc001kwk.3	chr10:104629209	+	chr10:104629009-104629349		0000
ASAH1	uc003wym.2	chr8:17941879	-	chr8:17941679-17942079	6.655	0011
ASAH2	uc001jjd.3	chr10:52008370	-	chr10:52008370-52008570		0000
ASAP1	uc011liw.2	chr8:131455906	-	chr8:131455706-131456106		0000			G2/M			TTCCCGG_0.969_-_-141 TTGGCCC_1.000_-_-191		AAACA_1.000_-_-102		G2/M			TTTGGA_1.000_+_-100
ASAP2	uc002qzi.2	chr2:9346893	+	chr2:9346693-9347093		0000			M/G1			TTCCCGC_0.979_+_50 TTGGCGG_0.901_+_-64				M/G1
ASAP3	uc010oea.1	chr1:23810750	-	chr1:23810626-23810950		0000
ASB1	uc002vyg.3	chr2:239335625	+	chr2:239335425-239335711		0000						TTCCGGC_0.980_-_5
ASB10	uc003wjn.1	chr7:150884919	-	chr7:150884809-150885119		0000
ASB11	uc010net.2	chrX:15333746	-	chrX:15333727-15333946		0000				TTTAAA_1.000_+_-64	TTTAAA_1.000_+_-64		TAACTG_0.996_-_-120	AAATA_1.000_+_-60					TTTTAA_1.000_-_-63 TTTAAA_1.000_+_-64 TTTAAA_1.000_-_-64 TTAGAA_0.918_+_-112
ASB13	uc009xic.2	chr10:5708558	-	chr10:5708514-5708758		0000			S-phase									S		CGGCGG_0.005_+_-95_GTTGTA_0.995_-_-85
ASB14	uc021wzs.1	chr3:57326132	-	chr3:57326061-57326332		0000			S-phase									S
ASB15	uc003vkw.1	chr7:123249111	+	chr7:123248911-123249311		0000					CTTGAA_0.276_-_35
ASB16	uc002ifl.1	chr17:42248073	+	chr17:42247873-42248157		0000						TTGGGCC_0.909_+_-124		AAATA_0.999_-_-52
ASB17	uc001dhe.2	chr1:76398116	-	chr1:76397976-76398316		0000					TTTAAA_0.852_+_23 TTTGAA_0.856_-_-109			AAATA_0.995_+_69
ASB18	uc010znh.2	chr2:237172988	-	chr2:237172988-237173188		0000								AAATA_0.927_-_-103
ASB2	uc001ycd.3	chr14:94443076	-	chr14:94442876-94443276		0000				TTTGAA_0.999_-_140	TTTGAA_0.999_-_140	TTGGGGC_0.989_-_119 TTGGGGC_0.950_+_186		AAACA_0.972_+_-97 AAATA_0.999_+_125					TTTGAA_0.999_-_140
ASB4	uc003unx.3	chr7:95115212	+	chr7:95115012-95115283		0000				TTTGAA_1.000_+_-76 TTTGAA_1.000_+_-83	TTTGAA_1.000_+_-76 TTTGAA_1.000_+_-83 TTTAAA_0.367_+_-124			AAACA_0.996_-_12 AAATA_1.000_+_-57 AAATA_1.000_-_-86					TTTCAA_1.000_-_-75 TTTGAA_1.000_+_-76 TTTGAA_1.000_+_-83
ASB5	uc003iuq.2	chr4:177190373	-	chr4:177190259-177190573		0000				TTTGAG_0.986_+_65	TTTGAG_0.719_+_-21 TTTGAG_0.986_+_65			AAATA_0.996_+_-27 AAATA_0.990_-_-74					TTTGAG_0.986_+_65 TCTGAA_0.997_-_-70
ASB6	uc011mbt.2	chr9:132404448	-	chr9:132404278-132404648		0000
ASB7	uc002bwk.3	chr15:101142754	+	chr15:101142554-101142954		0000			G2/M									G2/M	GTTGAA_0.986_+_18 TTTGCA_1.000_-_83
ASB8	uc001rrh.3	chr12:48551377	-	chr12:48551177-48551577		0000						TTCCGGG_1.000_+_80		AAACA_0.965_+_49
ASB9	uc004cwm.3	chrX:15288293	-	chrX:15288093-15288493		0000					TTTGTA_0.859_-_-90
ASCC1	uc021pso.1	chr10:73975867	-	chr10:73975667-73976067		0000
ASCC2	uc003agr.3	chr22:30234293	-	chr22:30234093-30234493		0000			G2			TTCCGGG_1.000_-_37					G2		TTTGAC_1.000_+_31
ASCC3	uc003pql.3	chr6:101329224	-	chr6:101329024-101329424		0000			S-phase									S
ASCL1	uc001tjr.4	chr12:103351451	+	chr12:103351251-103351651		0000						TTGCGCC_0.928_-_150		AAATA_0.919_+_105					TTTCAA_1.000_-_-28 ATTGAA_1.000_+_-29
ASCL2	uc001lvu.3	chr11:2292182	-	chr11:2291982-2292382		0000
ASCL3	uc001mhd.1	chr11:8964580	-	chr11:8964380-8964780		0000				TTTGTA_0.982_+_-149	TAGGAA_0.105_+_-91 TTTGTA_0.982_+_-149 TTTGAA_0.503_-_165		TAACTG_1.000_+_-53	AAACA_1.000_-_-57					TTTGCA_0.997_+_-39 TTTGTA_0.982_+_-149
ASCL4	uc001tmr.3	chr12:108168161	+	chr12:108167961-108168361		0000				TTTGAT_0.997_+_-60 TTTGAT_0.997_+_184	TTTAAA_0.230_+_87 TTTGAT_0.997_+_184 TTTGAT_0.997_+_-60			AAACA_1.000_-_-119					TTTGAT_0.997_+_-60 TTTGAT_0.997_+_184
ASF1A	uc011ebn.2	chr6:119215240	+	chr6:119215040-119215440		0000				TAGGAA_1.000_+_148	TAGGAA_1.000_+_148	TTCCGGG_1.000_+_17	TAACTG_1.000_-_-4	AAATA_1.000_+_145 AAACA_1.000_+_161 AAATA_1.000_+_185					TTTGCA_0.999_-_157	TCCGCC_1.000_+_-42_TTAGGA_1.000_-_-32	TCCGCC_1.000_+_-42_TTAGGA_1.000_-_-32
ASF1B	uc002mye.3	chr19:14247440	-	chr19:14247268-14247640	15.1833	1011			S-phase	TTTGAA_1.000_+_11	TTTGAA_1.000_+_11			AAATA_1.000_-_9	S-phase		G2/M		TTTGAA_1.000_+_11	GGCCGG_0.794_+_2_CTTCAA_1.000_-_12
ASGR1	uc021toy.1	chr17:7082883	-	chr17:7082683-7083083		0000								AAACA_0.966_-_138					TTTGGA_1.000_-_147
ASGR2	uc002ger.3	chr17:7018130	-	chr17:7017930-7018330		0000								AAACA_0.967_-_-17					TTTGGA_1.000_-_-8
ASH2L	uc003xkt.4	chr8:37963010	+	chr8:37962810-37963068	12.17	1011					TTTGAA_0.296_+_-18									CGCGCC_0.000_+_-92_CTTAAA_0.975_+_-82 CGCGCC_0.000_+_-92_TTTAAG_0.975_-_-82
ASIP	uc002xah.1	chr20:32848170	+	chr20:32847970-32848180		0000			S-phase						S-phase
ASL	uc011kdu.1	chr7:65540775	+	chr7:65540575-65540975		0000
ASMT	uc010ncy.3	chrX:1733940	+	chrX:1733740-1734092		0000
ASMT	uc010nvy.3	chrY:1683940	+	chrY:1683740-1684092		0000
ASMTL	uc004cpx.2	chrX:1571870	-	chrX:1571733-1572070		0000
ASMTL	uc004fpk.2	chrY:1521870	-	chrY:1521733-1522070		0000
ASNA1	uc002muv.3	chr19:12848305	+	chr19:12848105-12848319	7.88667	1011													TTGGAA_0.997_-_8 TTTGGA_0.999_-_9
ASNS	uc011kio.2	chr7:97501854	-	chr7:97501654-97502054		0000
ASNSD1	uc002uqt.3	chr2:190526124	+	chr2:190525924-190526324		0000
ASPA	uc002fvq.3	chr17:3379295	+	chr17:3379095-3379453		0000								AAATA_1.000_+_-55 AAATA_1.000_-_-66 AAACA_0.999_+_-96 AAATA_0.997_-_-139					TTTGGA_0.998_-_-58 TTTTAA_0.999_+_-64 TTTGCA_0.999_+_-72 TTAGAA_1.000_+_-110 TCTGAA_0.967_+_121
ASPDH	uc010enz.3	chr19:51017142	-	chr19:51017080-51017342		0000													TTTGGA_0.995_-_-24
ASPG	uc001yop.2	chr14:104552022	+	chr14:104551822-104552107		0000
ASPH	uc003xun.3	chr8:62627199	-	chr8:62626999-62627399		0000			G1/S								G1/S	S
ASPHD1	uc002dut.3	chr16:29912146	+	chr16:29911946-29912292		0000					TAGGAA_0.528_+_-82
ASPHD2	uc003acg.2	chr22:26825279	+	chr22:26825079-26825479		0000			G2/M			TTCGCGG_0.920_+_-43			G2/M			M/G1
ASPM	uc001gtw.4	chr1:197115824	-	chr1:197115624-197116024	23.86	1111	1	1	G2/M	TTTAAA_0.999_+_17 TTTGAA_0.930_-_-89	TTTAAA_0.999_+_17 TTTGAA_0.930_-_-89	TTGCCGC_0.965_-_9				G2/M	M/G1	G2/M	TTTAAA_0.999_+_17 TTTAAA_0.999_-_17 TTTGAA_0.930_-_-89	GGCGGC_0.972_+_8_GTTTAA_0.995_-_18	GGCGGC_0.972_+_8_GTTTAA_0.995_-_18
ASPN	uc010mqy.2	chr9:95244844	-	chr9:95244644-95245044		0000				TTTGTA_0.996_-_1 CTTGAA_0.937_+_-121 TTTAAA_0.970_+_-138	TTTGTA_0.996_-_1 CTTGAA_0.937_+_-121 TTTAAA_0.970_+_-138		CAACTG_0.985_-_-90	AAACA_1.000_+_4 AAACA_1.000_+_17 AAATA_1.000_-_-126					TTTGTA_0.996_-_1 TTTTAA_1.000_+_38 TCTGAA_0.999_-_-51 CTTGAA_0.937_+_-121 TTTTAA_0.975_-_-137 TTTAAA_0.970_+_-138 TTTAAA_0.970_-_-138 TTTTAA_0.954_+_-139
ASPRV1	uc002sfz.4	chr2:70189397	-	chr2:70189197-70189597		0000			M/G1									M/G1
ASPSCR1	uc021ufj.1	chr17:79935425	+	chr17:79935225-79935522		0000								AAACA_0.987_-_58					TTTGAC_0.935_+_60
ASRGL1	uc001ntg.4	chr11:62104773	+	chr11:62104573-62104973		0000					TTCGAG_0.191_-_-186
ASS1	uc010mza.3	chr9:133320093	+	chr9:133319893-133320293		0000
ASTE1	uc003env.1	chr3:130745646	-	chr3:130745446-130745846	6.63	0010			G1/S			TTCCGCC_0.918_-_-22						G1/S		CGGGGC_0.889_+_-59_TGGGAA_0.966_+_-49
ASTL	uc010yui.2	chr2:96804175	-	chr2:96804175-96804375		0000
ASTN1	uc009wwx.1	chr1:177134024	-	chr1:177133824-177134224		0000						TTCCCGG_0.999_-_2		AAACA_1.000_+_7
ASTN2	uc004bjt.2	chr9:120177317	-	chr9:120177216-120177517		0000						TTCGGCG_0.983_+_6
ASUN	uc001rhk.4	chr12:27091254	-	chr12:27091054-27091454		0000
ASXL1	uc002wxs.3	chr20:30946146	+	chr20:30945946-30946346		0000		1	G2/M	TTTGAA_1.000_-_-53	TTTGAA_1.000_-_-53	TTCCCGC_0.979_-_99 TTCCCGG_0.995_-_-162		AAACA_1.000_-_-61	G2/M				TGTGAA_0.997_-_-15 TTTGAA_1.000_-_-53
ASXL2	uc002rgs.2	chr2:26101312	-	chr2:26101112-26101512		0000						TTCGCGC_0.970_+_-93 TTCCCGG_0.999_+_123 TTCCCGC_1.000_-_134	CAACGG_1.000_+_16							CGCGGG_1.000_+_-58_TGTGAC_1.000_-_-48 GCCCCC_0.999_+_89_TCTGAC_1.000_+_99	CGCGGG_1.000_+_-58_TGTGAC_1.000_-_-48 GCCCCC_0.999_+_89_TCTGAC_1.000_+_99
ASXL3	uc002kxq.2	chr18:31158540	+	chr18:31158340-31158595		0000													TTTGCA_0.999_-_49
ASZ1	uc003vjb.2	chr7:117067577	-	chr7:117067514-117067777		0000
ATAD1	uc001kez.1	chr10:89577917	-	chr10:89577717-89578117		0000
ATAD2	uc003yqj.3	chr8:124408705	-	chr8:124408597-124408905	23.3825	1111		1	S-phase			TTCCGCG_1.000_-_28			S-phase		G1/S	G1/S		GGCGCC_1.000_+_11_TCCGAA_1.000_-_21 GGCGCC_1.000_+_11_TTCGGA_1.000_+_21	GGCGCC_1.000_+_11_TCCGAA_1.000_-_21 GGCGCC_1.000_+_11_TTCGGA_1.000_+_21
ATAD2B	uc002rei.4	chr2:24149936	-	chr2:24149736-24150136		0000						TTCGCCC_0.995_-_45 TTGGCCC_1.000_+_-54 TTCCGGC_0.957_-_-70
ATAD3A	uc001aga.2	chr1:1447522	+	chr1:1447322-1447648		0000
ATAD3B	uc001afv.3	chr1:1407163	+	chr1:1406963-1407264	7.285	1001
ATAD3C	uc001aft.2	chr1:1385068	+	chr1:1384868-1385268		0000
ATAD5	uc002hfs.1	chr17:29159022	+	chr17:29158822-29159222	18.515	1111	1		G1/S		TTCGAT_0.298_+_156	TTCGCGC_1.000_-_-26						G1/S
ATAT1	uc003nqv.3	chr6:30594662	+	chr6:30594462-30594662		0000			G1/S			TTCCGCC_0.948_-_-47						G1/S
ATCAY	uc010xhz.2	chr19:3880617	+	chr19:3880417-3880817		0000					TTTAAA_0.621_+_-132
ATE1	uc010qtr.2	chr10:123687546	-	chr10:123687464-123687746		0000						TTCGCGC_0.982_+_-30		AAATA_0.952_+_-123
ATF1	uc001rww.4	chr12:51157788	+	chr12:51157588-51157988		0000
ATF2	uc002ujq.3	chr2:176032897	-	chr2:176032697-176033097	6.24	0010				TTTAAA_1.000_+_15 TTTGTA_1.000_+_51	TTTAAA_1.000_+_15 TTTGTA_1.000_+_51			AAACA_0.998_+_56					TTTAAA_1.000_+_15 TTTAAA_1.000_-_15 TTTGTA_1.000_+_51
ATF3	uc021piu.1	chr1:212781969	+	chr1:212781769-212782169		0000			S-phase									S		CCCGGG_0.311_+_23_TATTAA_1.000_+_33
ATF4	uc003axz.3	chr22:39916568	+	chr22:39916368-39916768	7.44667	1011						TTGCCGC_0.982_-_159							TTTGCA_1.000_+_126
ATF5	uc002prd.3	chr19:50432399	+	chr19:50432199-50432599		0000			G2/M			TTCCGCG_0.995_-_-8						G2/M
ATF6	uc001gbs.3	chr1:161736033	+	chr1:161735833-161736150		0000	1
ATF6B	uc011dph.2	chr6:32096017	-	chr6:32095984-32096217		0000						TTCCCCC_0.907_-_23
ATF7	uc010sol.2	chr12:54020199	-	chr12:54019999-54020399	6.93	0010						TTCCGCC_0.999_+_52 TTCCCCC_1.000_-_62	CAACGG_1.000_+_118						TTTTAA_0.997_+_144 TTTCAA_0.999_+_184 GTTGAA_0.999_-_185
ATF7IP	uc010shs.1	chr12:14518610	+	chr12:14518410-14518810	5.86	0010		1	G2/M	TTTGAA_1.000_+_3 TAGGAA_0.982_+_107 TTTGAA_1.000_-_-155	TTTGAA_1.000_+_3 TAGGAA_0.982_+_107 TTTGAA_1.000_-_-155	TTCGCGC_0.972_-_55 TTGCCGC_0.907_-_70 TTCCGCC_0.945_+_138 TTGGCCC_0.959_-_-171	TAACGG_1.000_+_-36	AAACA_1.000_-_-1 AAATA_1.000_+_-152	G2/M	M/G1	G2		TTTGAA_1.000_+_3 TTTGCA_0.991_+_-42 TTTGCA_1.000_+_-136 TTTGAA_1.000_-_-155	CCCCGG_0.998_+_-30_CTTGCA_0.999_-_-20	CCCCGG_0.998_+_-30_CTTGCA_0.999_-_-20
ATF7IP2	uc002czw.3	chr16:10522724	+	chr16:10522524-10522924		0000			M/G1		TTTAAA_0.149_+_179 TTTGAG_0.203_+_22 TTTAAA_0.480_+_-127					M/G1
ATG10	uc010jas.3	chr5:81267843	+	chr5:81267643-81268043		0000
ATG12	uc003krh.3	chr5:115177548	-	chr5:115177390-115177734	8.04	0101
ATG13	uc010rgv.2	chr11:46638825	+	chr11:46638625-46639025		0000
ATG14	uc001xbx.2	chr14:55878576	-	chr14:55878540-55878776		0000								AAACA_1.000_+_-5					TTTCAA_0.994_-_-9 GTTGAA_0.994_+_-10
ATG16L1	uc002vty.3	chr2:234160216	+	chr2:234160016-234160416		0000						TTGGGGG_0.951_-_-52
ATG16L2	uc010rrf.1	chr11:72525450	+	chr11:72525250-72525490		0000
ATG2A	uc001obx.3	chr11:64684722	-	chr11:64684607-64684922	6.21	1010						TTCGCGC_0.926_+_-107								CGGGGG_1.000_+_30_AGTGAA_1.000_+_40	CGGGGG_1.000_+_30_AGTGAA_1.000_+_40
ATG3	uc010hqe.3	chr3:112280485	-	chr3:112280375-112280685		0000			G1/S									G1/S
ATG4A	uc004enr.3	chrX:107334898	+	chrX:107334750-107335056		0000					TTTGAG_0.371_+_10	TTGCCGG_0.999_+_123 TTGGCCC_1.000_+_135
ATG4B	uc002wbu.3	chr2:242577026	+	chr2:242576826-242577129		0000								AAATA_0.921_-_-35						CCGGCC_0.416_+_-66_TTTGGC_0.937_-_-56 GCGGCC_0.997_+_87_TGGGAA_0.929_+_97	GCGGCC_0.997_+_87_TGGGAA_0.929_+_97
ATG4C	uc001dat.3	chr1:63249776	+	chr1:63249576-63249976	5.63	0010						TTCCGGG_0.968_-_-42
ATG4D	uc010xlh.2	chr19:10654646	+	chr19:10654446-10654766		0000
ATG5	uc010kdb.3	chr6:106773695	-	chr6:106773495-106773895		0000						TTCCGCC_1.000_-_92 TTGCGGC_0.914_+_139
ATG7	uc011aum.2	chr3:11314009	+	chr3:11313809-11314209		0000			G2/M			TTGCCGG_1.000_+_88						G2/M
ATG9A	uc002vkf.1	chr2:220094361	-	chr2:220094161-220094561		0000														CGGCGG_0.021_+_64_TCTGGA_0.981_+_74
ATG9B	uc011kvc.2	chr7:150721586	-	chr7:150721510-150721786		0000
ATHL1	uc010qvu.2	chr11:289137	+	chr11:288937-289337		0000
ATIC	uc002vex.4	chr2:216176678	+	chr2:216176478-216176865		0000
ATL1	uc001wyd.4	chr14:50999799	+	chr14:50999599-50999999		0000				TTTGAG_0.970_+_3	TTTGAG_0.970_+_3			AAACA_0.999_-_-27					TTTGAG_0.970_+_3 TTTGCA_0.995_-_-22 TTTGCA_0.999_+_-24
ATL2	uc002rqs.3	chr2:38604432	-	chr2:38604402-38604632		0000			G2/M	TTTAAA_1.000_+_13	TTTAAA_1.000_+_13					G2/M		G2	TTTGAC_1.000_+_-10 TTTTAA_1.000_+_12 TTTAAA_1.000_+_13 TTTAAA_1.000_-_13	TCCCGG_1.000_+_-40_TATCAA_1.000_-_-30	TCCCGG_1.000_+_-40_TATCAA_1.000_-_-30
ATL3	uc001nxk.1	chr11:63439083	-	chr11:63438883-63439107		0000						TTCCCGC_0.986_+_37 TTCCCGC_0.999_+_186
ATM	uc001pkb.1	chr11:108093558	+	chr11:108093358-108093758	12.655	1111						TTCGGCG_1.000_-_-122
ATMIN	uc002ffz.1	chr16:81069457	+	chr16:81069257-81069475		0000						TTCCGGC_1.000_-_-43								GCCCGC_0.455_+_-82_TTAGCA_0.999_-_-72
ATN1	uc001qrw.1	chr12:7033625	+	chr12:7033425-7033825		0000			G2/M								G2/M
ATOH1	uc003hta.1	chr4:94750077	+	chr4:94749877-94750077		0000
ATOH7	uc001jnq.3	chr10:69991870	-	chr10:69991670-69992070		0000				TAGGAA_0.998_+_-105	TAGGAA_0.998_+_-105								GTTGAA_1.000_-_-175 TTTGGA_0.989_+_-186
ATOH8	uc002sqm.4	chr2:85980908	+	chr2:85980708-85981108		0000				TTTGAA_0.999_+_-2 TTTAAA_1.000_+_20	TTTGAA_0.999_+_-2 TTTAAA_1.000_+_20			AAACA_1.000_-_-5 AAACA_1.000_-_14 AAACA_1.000_+_142					TTTCAA_0.999_-_-1 TTTGAA_0.999_+_-2 TTTAAA_1.000_+_20 TTTAAA_1.000_-_20	GCGGGC_0.997_+_164_TCTGGA_0.995_-_174	GCGGGC_0.997_+_164_TCTGGA_0.995_-_174
ATOX1	uc003luk.3	chr5:151138210	-	chr5:151138112-151138410		0000
ATP10A	uc010ayu.3	chr15:26108349	-	chr15:26108243-26108549		0000
ATP10B	uc003lyp.2	chr5:160279219	-	chr5:160279019-160279419		0000					TTTGTA_0.764_+_-183
ATP10D	uc003gxj.3	chr4:47487409	+	chr4:47487209-47487609		0000
ATP11A	uc001vsj.4	chr13:113344642	+	chr13:113344442-113344730		0000
ATP11B	uc003fla.3	chr3:182511290	+	chr3:182511090-182511490		0000							CAACGG_0.985_+_-6							GCGGGG_0.861_+_-25_TTTGGG_0.920_+_-15
ATP11C	uc004fba.3	chrX:138914447	-	chrX:138914348-138914647		0000
ATP12A	uc010aaa.3	chr13:25254548	+	chr13:25254348-25254748		0000
ATP13A1	uc002nnh.4	chr19:19774503	-	chr19:19774475-19774703		0000				TAGGAA_0.986_+_19	TAGGAA_0.986_+_19	TTCCGGG_1.000_-_-1
ATP13A2	uc001bac.2	chr1:17338423	-	chr1:17338233-17338623		0000
ATP13A3	uc003fty.4	chr3:194188968	-	chr3:194188768-194189168		0000				CTTGAA_1.000_-_-116	CTTGAA_1.000_-_-116 TTTGTA_0.114_-_80								CTTGAA_1.000_-_-116
ATP13A4	uc003ftd.3	chr3:193272696	-	chr3:193272588-193272896		0000				TTTGAG_0.903_+_-156	TTTGAG_0.903_+_-156								TTTGAG_0.903_+_-156
ATP13A5	uc011bsq.2	chr3:193096514	-	chr3:193096514-193096714		0000				TTTAAA_0.962_+_-122	TTTAAA_0.962_+_-122								TTTTAA_0.957_-_-121 TTTAAA_0.962_+_-122 TTTAAA_0.962_-_-122 TTTTAA_0.964_+_-123
ATP1A1	uc001egd.2	chr1:116915794	+	chr1:116915594-116915994		0000				TAGGAA_1.000_+_46	TAGGAA_1.000_+_46		TAACGG_1.000_+_-6	AAATA_1.000_-_41
ATP1A2	uc001fvb.2	chr1:160085519	+	chr1:160085319-160085651		0000				TTTAAA_1.000_+_2	TTTAAA_1.000_+_2	TTGGGGC_1.000_-_125		AAATA_1.000_-_0 AAACA_1.000_-_-59					TTTAAA_1.000_+_2 TTTAAA_1.000_-_2 GTTGAA_1.000_-_-56 TTTCAA_1.000_+_-57
ATP1A3	uc002osg.3	chr19:42498382	-	chr19:42498228-42498582		0000						TTGGCGG_0.997_-_145								GCGCCG_0.318_+_-156_TTTGCG_0.966_+_-146 GCGCGG_0.999_+_54_TCTGCA_0.997_-_64	GCGCGG_0.999_+_54_TCTGCA_0.997_-_64
ATP1A4	uc001fve.4	chr1:160121351	+	chr1:160121151-160121551		0000
ATP1B1	uc001gfr.1	chr1:169075946	+	chr1:169075746-169076067		0000			S-phase									S
ATP1B2	uc002gif.1	chr17:7554253	+	chr17:7554053-7554453		0000				TTTGTA_0.998_+_194	TTTGTA_0.998_+_194	TTCGGGG_0.993_+_158							TTTGTA_0.998_+_194
ATP1B3	uc003eug.1	chr3:141595469	+	chr3:141595269-141595643		0000
ATP1B4	uc004esq.3	chrX:119495939	+	chrX:119495739-119496023		0000						TTGGCGC_0.957_-_-17
ATP2A1	uc002dro.1	chr16:28889808	+	chr16:28889608-28889992		0000						TTCCCCC_1.000_+_-139		AAATA_0.999_+_-121						TGGCCG_1.000_+_0_CTTGAG_1.000_-_10 TGGGGC_0.999_+_-192_TTTGCG_1.000_+_-182	TGGCCG_1.000_+_0_CTTGAG_1.000_-_10 TGGGGC_0.999_+_-192_TTTGCG_1.000_+_-182
ATP2A2	uc001tql.4	chr12:110719031	+	chr12:110718831-110719231		0000			G2/M	TAGGAA_0.927_-_-168	TAGGAA_0.927_-_-168	TTCGCCG_0.998_-_-12 TTGGCCG_0.998_-_-45						G2/M
ATP2A3	uc002fwy.2	chr17:3867758	-	chr17:3867585-3867958		0000					TTTGTA_0.143_+_106	TTCCGGC_0.999_-_-70
ATP2B1	uc001tbh.3	chr12:90049844	-	chr12:90049663-90050044		0000					TTTGTA_0.425_-_49	TTGGCCC_1.000_-_-2		AAACA_0.999_-_68 AAACA_1.000_+_148					TATGAA_0.999_-_88 TTTTAA_1.000_-_95 TTGGAA_0.973_+_111	TGGGCC_1.000_+_-3_CTTGAC_1.000_-_7	TGGGCC_1.000_+_-3_CTTGAC_1.000_-_7
ATP2B2	uc003bvt.3	chr3:10547268	-	chr3:10547068-10547468		0000						TTCCCGG_0.972_-_78		AAATA_1.000_+_147 AAATA_1.000_+_154					TATGAA_0.939_-_108	TCCCCC_1.000_+_132_TGAGAA_0.999_+_142	TCCCCC_1.000_+_132_TGAGAA_0.999_+_142
ATP2B3	uc004fhs.1	chrX:152801579	+	chrX:152801379-152801705		0000
ATP2B4	uc001gzv.3	chr1:203595914	+	chr1:203595714-203596114		0000			M/G1			TTCCCCC_0.945_+_-118				M/G1
ATP2C1	uc011bli.2	chr3:130569368	+	chr3:130569168-130569568		0000					TAGGAA_0.437_-_52			AAATA_1.000_+_-8 AAACA_0.961_-_-128
ATP2C2	uc010chj.3	chr16:84402132	+	chr16:84401932-84402221		0000
ATP4A	uc002oal.1	chr19:36054560	-	chr19:36054531-36054760		0000
ATP4B	uc001vtz.3	chr13:114312513	-	chr13:114312459-114312713		0000
ATP5A1	uc002lbr.1	chr18:43678287	-	chr18:43678197-43678487		0000						TTCCGGG_1.000_+_-23								GGCCGG_0.962_+_-9_CTTGAC_0.966_+_1	GGCCGG_0.962_+_-9_CTTGAC_0.966_+_1
ATP5B	uc001slr.3	chr12:57039852	-	chr12:57039747-57040052		0000	1
ATP5C1	uc001iju.3	chr10:7830092	+	chr10:7829896-7830170		0000
ATP5D	uc002lro.3	chr19:1241748	+	chr19:1241548-1241849		0000						TTCGCGC_0.986_+_-33
ATP5E	uc002yal.3	chr20:57607422	-	chr20:57607306-57607622		0000
ATP5G1	uc002ioh.3	chr17:46970147	+	chr17:46969947-46970347	6.175	0011						TTGGCCG_0.994_-_-23 TTGGCCC_0.914_-_90 TTCCCGC_0.998_-_-128 TTGGGGC_0.983_+_131
ATP5G2	uc001sec.3	chr12:54070109	-	chr12:54069976-54070309		0000					TTCGAG_0.587_-_71
ATP5G3	uc002ujz.4	chr2:176046391	-	chr2:176046191-176046591		0000				TTTGTA_0.999_-_-149	TTTGTA_0.999_-_-149								TTTGTA_0.999_-_-149	CCCCGC_0.932_+_-109_GATGAA_1.000_-_-99	CCCCGC_0.932_+_-109_GATGAA_1.000_-_-99
ATP5H	uc002jmn.1	chr17:73043074	-	chr17:73042874-73043274		0000						TTGGGGG_1.000_-_-153
ATP5I	uc003gas.3	chr4:668127	-	chr4:668036-668327		0000
ATP5J	uc002ylw.3	chr21:27107965	-	chr21:27107765-27108165		0000						TTCCGGG_0.991_-_14		AAACA_1.000_+_-30 AAACA_1.000_+_-35
ATP5J2-PTCD1	uc011kiw.2	chr7:99063824	-	chr7:99063764-99064024		0000													TTTGGA_1.000_-_53
ATP5L	uc001psx.3	chr11:118272103	+	chr11:118271903-118272303		0000														GCGGCC_0.359_+_177_CTTGGA_0.933_+_187
ATP5L2	uc003bda.1	chr22:43036607	-	chr22:43036407-43036807		0000
ATP5S	uc021rsv.1	chr14:50779046	+	chr14:50778868-50779246		0000						TTCGCCC_0.902_-_-11
ATP5SL	uc002oqz.2	chr19:41945843	-	chr19:41945804-41946043		0000
ATP6AP1	uc004flf.1	chrX:153656977	+	chrX:153656777-153657038		0000
ATP6AP1L	uc003khw.3	chr5:81600752	+	chr5:81600552-81600952		0000				TTTGAG_0.951_-_-109 TTTGAT_0.999_-_-173	TTTGAG_0.951_-_-109 TTTGAT_0.999_-_-173								TTTGAG_0.951_-_-109 TTTGAT_0.999_-_-173
ATP6AP2	uc004det.3	chrX:40440215	+	chrX:40440015-40440317		0000
ATP6V0A1	uc002hzp.1	chr17:40610861	+	chr17:40610661-40611061		0000
ATP6V0A2	uc001ufq.1	chr12:124196864	+	chr12:124196664-124197064		0000						TTCCGCC_1.000_-_4
ATP6V0A4	uc003vuf.3	chr7:138458782	-	chr7:138458582-138458982		0000
ATP6V0B	uc001cld.3	chr1:44440601	+	chr1:44440401-44440712		0000
ATP6V0C	uc021tav.1	chr16:2563726	+	chr16:2563526-2563926		0000
ATP6V0D1	uc010vjo.1	chr16:67515089	-	chr16:67514989-67515289		0000
ATP6V0D2	uc003ydp.1	chr8:87111138	+	chr8:87110938-87111207		0000
ATP6V0E1	uc003mcd.1	chr5:172410762	+	chr5:172410562-172410863		0000
ATP6V0E2	uc003wgr.3	chr7:149570056	+	chr7:149569856-149570256		0000			S-phase									S
ATP6V1A	uc003eao.3	chr3:113465865	+	chr3:113465665-113466065		0000			G1/S								G1/S
ATP6V1B1	uc002shi.1	chr2:71162997	+	chr2:71162797-71163084		0000
ATP6V1B2	uc003wzp.3	chr8:20054703	+	chr8:20054503-20054903		0000
ATP6V1C1	uc003ykz.4	chr8:104033247	+	chr8:104033047-104033447		0000
ATP6V1C2	uc002rat.3	chr2:10861774	+	chr2:10861574-10861974		0000
ATP6V1D	uc001xjf.3	chr14:67826720	-	chr14:67826520-67826920		0000
ATP6V1E1	uc002zmr.1	chr22:18111588	-	chr22:18111401-18111788		0000
ATP6V1E2	uc002ruy.3	chr2:46747096	-	chr2:46746896-46747296		0000
ATP6V1F	uc003voc.2	chr7:128502856	+	chr7:128502656-128502958		0000
ATP6V1G1	uc004bjc.3	chr9:117349993	+	chr9:117349793-117350118		0000
ATP6V1G2	uc021yur.1	chr6:31514625	-	chr6:31514425-31514825		0000
ATP6V1G3	uc001guo.3	chr1:198510075	-	chr1:198509875-198510275		0000								AAACA_0.994_-_103
ATP6V1H	uc011ldv.2	chr8:54755850	-	chr8:54755650-54756050		0000
ATP7A	uc004ecx.4	chrX:77166193	+	chrX:77165993-77166393		0000						TTCCGGG_0.966_-_-86
ATP7B	uc001vfy.2	chr13:52585630	-	chr13:52585473-52585830		0000
ATP8A1	uc003gwr.2	chr4:42659122	-	chr4:42658922-42659322		0000
ATP8A2	uc001uqk.3	chr13:25946208	+	chr13:25946008-25946350		0000
ATP8B1	uc002lgw.3	chr18:55470327	-	chr18:55470127-55470527		0000						TTCCCCG_0.988_+_-60 TTGGCGG_0.994_-_-77 TTGGCCG_1.000_+_-191
ATP8B2	uc001fex.3	chr1:154300275	+	chr1:154300075-154300275		0000					TTCGAG_0.168_+_-160			AAACA_0.945_-_-111
ATP8B3	uc002ltv.3	chr19:1812199	-	chr19:1811999-1812399		0000
ATP8B4	uc010ufd.2	chr15:50411419	-	chr15:50411219-50411619		0000				TTTGAG_0.964_+_-68	TTTGAG_0.964_+_-68			AAACA_0.983_-_-40					TTTGAG_0.964_+_-68
ATP9A	uc010gih.1	chr20:50384908	-	chr20:50384908-50385108		0000
ATP9B	uc002lmx.3	chr18:76829396	+	chr18:76829196-76829410		0000
ATPAF1	uc001cqi.3	chr1:47134099	-	chr1:47133994-47134299		0000
ATPAF1-AS1	uc001cqj.3	chr1:47137496	+	chr1:47137296-47137606		0000
ATPAF2	uc002gse.1	chr17:17942480	-	chr17:17942327-17942680		0000
ATPIF1	uc001bpp.3	chr1:28562601	+	chr1:28562401-28562694	7.11	0011
ATR	uc003eux.4	chr3:142297668	-	chr3:142297546-142297868	8.69667	1011						TTCCGGG_1.000_+_-1
ATRIP	uc003ctg.1	chr3:48488217	+	chr3:48488017-48488249		0000
ATRN	uc021vzz.1	chr20:3451664	+	chr20:3451464-3451719		0000
ATRNL1	uc001lcf.3	chr10:116853123	+	chr10:116852923-116853323		0000						TTGGCGC_0.988_+_3	CAACTG_0.963_-_0
ATRX	uc004ecr.2	chrX:77041719	-	chrX:77041519-77041919		0000			M/G1	TTTGAT_1.000_-_-127	TTTGAG_0.505_+_94 TTTGAT_1.000_-_-127	TTGGCGC_1.000_-_-6 TTGGGCC_1.000_-_19 TTCCGCG_1.000_+_57 TTGGGGG_1.000_-_-96		AAACA_1.000_-_54		M/G1			TTTGAT_1.000_-_-127
ATXN1	uc003nbt.3	chr6:16761721	-	chr6:16761521-16761921		0000						TTGCGGC_0.999_-_121	CAACTG_1.000_+_-159	AAACA_1.000_-_62 AAACA_0.999_+_84 AAACA_1.000_-_133 AAATA_1.000_-_-148					TTTGGA_0.999_-_80
ATXN10	uc003bgm.2	chr22:46067677	+	chr22:46067477-46067877		0000
ATXN1L	uc002fbd.2	chr16:71879898	+	chr16:71879698-71880098		0000			G2/M				CAACGG_0.994_-_190		G2/M				TGTGAA_1.000_+_96
ATXN2	uc001tsj.3	chr12:112037480	-	chr12:112037318-112037680		0000						TTCGGGG_0.984_-_-68
ATXN2L	uc002dra.3	chr16:28834413	+	chr16:28834213-28834580		0000						TTCCGCC_1.000_+_-24 TTCCCGC_1.000_+_85
ATXN3	uc021rzo.1	chr14:92572965	-	chr14:92572896-92573165		0000							CAACGG_1.000_-_45	AAATA_1.000_+_60
ATXN3L	uc010ned.3	chrX:13338518	-	chrX:13338318-13338718		0000
ATXN7	uc021wzy.1	chr3:63884074	+	chr3:63883874-63884274		0000					CTTGAA_0.137_+_-132 TTTGTA_0.270_+_-156								TCTGAA_0.978_+_2
ATXN7L3	uc002ifz.3	chr17:42275529	-	chr17:42275438-42275729		0000						TTGCCGC_1.000_+_35
AUH	uc004arf.4	chr9:94124206	-	chr9:94124171-94124406		0000
AUP1	uc021vjm.1	chr2:74756974	-	chr2:74756848-74757133		0000						TTCCCGG_0.977_-_4 TTCCGGC_1.000_+_82								GCCCGC_1.000_+_-136_TCTGAG_0.923_-_-126	GCCCGC_1.000_+_-136_TCTGAG_0.923_-_-126
AURKA	uc002xxe.1	chr20:54967351	-	chr20:54967151-54967551	18.5975	1111	1	1	G2/M	TTTAAA_1.000_+_60 TTTGAA_0.959_+_76	TTTAAA_1.000_+_60 TTTGAA_0.959_+_76		TAACGG_0.997_+_85 CAACGG_0.968_-_-104	AAATA_0.998_-_58	G2/M	G2/M		G2/M	TTTAAA_1.000_+_60 TTTAAA_1.000_-_60 TTTTAA_1.000_-_61 TTTGAA_0.959_+_76 TTAGAA_0.943_-_82
AURKAIP1	uc009vkb.1	chr1:1310562	-	chr1:1310362-1310762		0000
AURKB	uc002gkm.3	chr17:8113883	-	chr17:8113683-8114083	19.055	1111	1	1	G2	TTTGAA_0.999_+_-50	TTTGAA_0.999_+_-50				G2	G2/M	G2/M		TTTCAA_0.989_-_-49 TTTGAA_0.999_+_-50	GGCGGG_0.866_+_-59_TTGAAA_0.989_+_-49 GGGCGG_0.717_+_-60_TTCAAA_0.999_-_-50
AURKC	uc010etv.3	chr19:57742427	+	chr19:57742227-57742481		0000
AUTS2	uc003tvv.4	chr7:69063904	+	chr7:69063704-69064104		0000				TTCGAG_0.977_-_-77	TTCGAG_0.977_-_-77 TTTGAG_0.460_+_-192	TTCGCCC_0.953_+_11	CAACTG_0.997_+_-52
AVEN	uc001zhj.3	chr15:34331303	-	chr15:34331247-34331503		0000
AVIL	uc001sqj.2	chr12:58209852	-	chr12:58209823-58210052		0000			G1/S					AAACA_0.912_-_1				G1/S
AVL9	uc003tcv.1	chr7:32535175	+	chr7:32534975-32535321		0000						TTCCGGG_0.999_-_-60
AVP	uc002whu.3	chr20:3065370	-	chr20:3065320-3065570		0000								AAATA_1.000_+_-28
AVPI1	uc001koi.2	chr10:99447015	-	chr10:99446815-99447215		0000
AVPR1A	uc001sro.1	chr12:63546590	-	chr12:63546390-63546790		0000
AVPR1B	uc001hds.2	chr1:206224282	+	chr1:206224082-206224440		0000				TTTGAG_0.907_+_-193	TTTGAG_0.907_+_-193								TTTGAG_0.907_+_-193
AVPR2	uc004fjh.4	chrX:153170427	+	chrX:153170227-153170599		0000
AWAT1	uc004dxy.3	chrX:69454504	+	chrX:69454304-69454545		0000					TAGGAA_0.163_+_-194								TTTGAC_0.938_-_-183
AWAT2	uc004dxt.1	chrX:69269788	-	chrX:69269782-69269988		0000
AX746903	uc003idj.1	chr4:120548944	+	chr4:120548744-120549144		0000														GCGCCC_0.756_+_68_TGTGCA_0.997_+_78
AX747619	uc002alq.1	chr15:63341586	-	chr15:63341386-63341786		0000								AAACA_0.995_-_-199
AX748230	uc003mnb.1	chr5:180657685	-	chr5:180657485-180657743		0000
AXIN1	uc002cgq.2	chr16:402676	-	chr16:402476-402876		0000						TTCGGCG_0.995_+_-9
AXIN2	uc002jfi.3	chr17:63557740	-	chr17:63557540-63557940		0000				TTTGAT_1.000_+_48	TTTGAT_1.000_+_48	TTGGCGC_1.000_+_-17 TTCCCGG_1.000_-_86 TTCGGGG_0.986_+_121 TTCCCCG_0.986_-_-137		AAATA_1.000_+_91 AAATA_0.995_+_97					TTTGAT_1.000_+_48
AXL	uc010ehi.1	chr19:41725107	+	chr19:41724907-41725297		0000
AY455283	uc001qtp.1	chr12:8025533	+	chr12:8025333-8025733		0000							CAACGG_0.930_-_-39
AZGP1	uc003ush.3	chr7:99573735	-	chr7:99573643-99573935		0000
AZGP1P1	uc022aie.1	chr7:99578384	+	chr7:99578184-99578395		0000
AZI1	uc002jzn.1	chr17:79196751	-	chr17:79196551-79196951		0000
AZI2	uc011axd.1	chr3:28390618	-	chr3:28390418-28390818		0000			G2/M									G2/M
AZIN1	uc003yky.3	chr8:103876397	-	chr8:103876197-103876597		0000								AAATA_0.988_+_-25						CCCGGC_0.462_+_-66_TGTGAT_0.998_+_-56 GCGCCG_0.938_+_-8_TGTGAG_1.000_-_2 TGGCGC_0.737_+_-10_TGAGAA_1.000_-_0	GCGCCG_0.938_+_-8_TGTGAG_1.000_-_2
AZU1	uc002lpz.1	chr19:827830	+	chr19:827630-827846		0000
B2M	uc001zuc.3	chr15:45003684	+	chr15:45003484-45003744		0000			M/G1									M/G1
B3GALNT1	uc003fdv.3	chr3:160822683	-	chr3:160822483-160822883		0000
B3GALNT2	uc001hxd.1	chr1:235667781	-	chr1:235667581-235667981		0000
B3GALT1	uc002udz.1	chr2:168675181	+	chr2:168674981-168675381		0000
B3GALT2	uc001gtc.4	chr1:193155743	-	chr1:193155543-193155943		0000				TTTAAA_1.000_+_2	TTTAAA_1.000_+_2 TTTGAG_0.610_-_79			AAACA_1.000_+_-74					TTTAAA_1.000_+_2 TTTAAA_1.000_-_2 TTTGCA_1.000_-_-77 TTTGAC_0.999_-_-88
B3GALT4	uc003odr.3	chr6:33244916	+	chr6:33244716-33245116		0000
B3GALT5	uc002yyl.1	chr21:41029253	+	chr21:41029053-41029453		0000
B3GALT6	uc001adk.3	chr1:1167628	+	chr1:1167428-1167658		0000			S-phase			TTCCGCC_0.994_-_-195						S
B3GALTL	uc010aaz.3	chr13:31774111	+	chr13:31773911-31774221		0000
B3GAT1	uc001qhr.3	chr11:134281812	-	chr11:134281612-134282012		0000						TTGCCCG_0.992_+_63	CAACGG_0.984_-_60						TATGAA_0.995_+_-43
B3GAT2	uc003pfw.3	chr6:71666788	-	chr6:71666588-71666988		0000
B3GAT3	uc009ynz.3	chr11:62389647	-	chr11:62389447-62389847		0000
B3GNT1	uc001ohr.3	chr11:66115161	-	chr11:66115016-66115361		0000
B3GNT2	uc002sbs.3	chr2:62423261	+	chr2:62423061-62423461		0000						TTGCCCC_0.977_+_190
B3GNT3	uc002nhl.1	chr19:17905918	+	chr19:17905718-17906118		0000
B3GNT4	uc001ubx.3	chr12:122688227	+	chr12:122688027-122688427		0000
B3GNT5	uc003flk.3	chr3:182971031	+	chr3:182970831-182971231		0000
B3GNT6	uc021qnp.1	chr11:76745434	+	chr11:76745234-76745634		0000
B3GNT7	uc002vrs.3	chr2:232260334	+	chr2:232260134-232260514		0000
B3GNT8	uc002oqs.3	chr19:41934635	-	chr19:41934435-41934835		0000					TTTGAA_0.779_-_31
B3GNT9	uc002erf.3	chr16:67184902	-	chr16:67184702-67185102		0000			G2/M									G2/M		TCCCCC_0.793_+_16_TTGGCA_1.000_-_26
B3GNTL1	uc002kgg.1	chr17:81009686	-	chr17:81009672-81009886		0000
B4GALNT1	uc001spg.1	chr12:58026985	-	chr12:58026785-58027185		0000														TCCGCG_0.047_+_-31_CTAGAA_0.969_+_-21
B4GALNT2	uc002ion.2	chr17:47210328	+	chr17:47210168-47210387		0000
B4GALNT3	uc001qii.1	chr12:569542	+	chr12:569342-569542		0000
B4GALNT4	uc001lpb.3	chr11:369794	+	chr11:369594-369803		0000
B4GALT1	uc003zsg.2	chr9:33167356	-	chr9:33167167-33167556		0000			G2/M			TTCCCGC_1.000_-_180			G2/M
B4GALT2	uc010okl.2	chr1:44445607	+	chr1:44445407-44445683		0000														GCCCCC_0.012_+_-114_TGTGGA_0.980_-_-104
B4GALT3	uc009wud.2	chr1:161147758	-	chr1:161147558-161147958		0000
B4GALT4	uc003eci.3	chr3:118959752	-	chr3:118959552-118959952		0000			G2							G2
B4GALT5	uc002xuu.4	chr20:48330421	-	chr20:48330227-48330621		0000														CCCCGC_0.988_+_-8_CATGAA_1.000_-_2 GCGCGG_0.622_+_-110_TTTGCG_0.969_+_-100	CCCCGC_0.988_+_-8_CATGAA_1.000_-_2
B4GALT6	uc002kwz.4	chr18:29264686	-	chr18:29264486-29264886		0000
B4GALT7	uc003mhy.3	chr5:177027118	+	chr5:177026918-177027211		0000
B7H6	uc001mmz.4	chr11:17373308	+	chr11:17373108-17373508		0000
B9D1;B9D1	uc010cqn.2	chr17:19266046	-	chr17:19266034-19266246		0000
B9D2	uc002oqj.2	chr19:41870078	-	chr19:41869878-41870278		0000						TTGCCCC_0.993_+_16						G2/M|M/G1
BAALC	uc003yle.3	chr8:104152920	+	chr8:104152720-104153120		0000			G1/S									G1/S
BAAT	uc010mtd.3	chr9:104145801	-	chr9:104145601-104146001		0000					TTTGAG_0.547_+_-43
BABAM1	uc002nfu.3	chr19:17378231	+	chr19:17378031-17378431		0000					TAGGAA_0.801_-_50
BAC05914.1	uc022aof.1	chr7:143839226	+	chr7:143839026-143839227		0000
BACE1	uc001pqy.3	chr11:117186972	-	chr11:117186772-117187172		0000						TTCCGCC_1.000_+_7							TTTGAC_1.000_+_-17
BACE1	uc009yzo.1	chr11:117162529	-	chr11:117162529-117162729		0000
BACE2	uc002yyy.3	chr21:42539727	+	chr21:42539527-42539927		0000				TTCGAG_1.000_-_-54	TTCGAG_1.000_-_-54	TTCCCGG_1.000_+_38	CAACGG_0.995_-_-13
BACH1	uc002ynj.3	chr21:30671219	+	chr21:30671019-30671419		0000					TTCGAG_0.114_+_-155	TTCCGCG_0.923_-_-35
BACH2	uc003pnw.3	chr6:91006627	-	chr6:91006427-91006827		0000						TTCGGCG_1.000_-_-9 TTCCGGG_0.963_+_30 TTCGCGG_1.000_+_-119		AAACA_1.000_+_64					TGTGAA_0.997_+_-35	CGCGGC_0.998_+_51_TTTGCT_1.000_-_61	CGCGGC_0.998_+_51_TTTGCT_1.000_-_61
BAG1	uc003zsj.3	chr9:33264759	-	chr9:33264672-33264959		0000
BAG2	uc003pdr.3	chr6:57037103	+	chr6:57036903-57037303		0000
BAG3	uc001lem.3	chr10:121410881	+	chr10:121410681-121411081	6.025	1010			G2/M			TTGGCCG_0.940_-_29 TTCCCGG_0.999_+_194	CAACTG_1.000_-_70	AAATA_1.000_-_120		M/G1		G2/M	TATGAA_1.000_-_170
BAG4	uc003xky.2	chr8:38034105	+	chr8:38033905-38034305		0000						TTCCGGC_0.963_-_-113
BAG5	uc001yni.2	chr14:104028655	-	chr14:104028455-104028855		0000														GCGCGC_0.896_+_-27_TGTGAG_1.000_+_-17
BAG6	uc003nvf.4	chr6:31620170	-	chr6:31619970-31620370		0000				TTCGAG_0.924_+_-82	TTCGAG_0.924_+_-82	TTGGGGG_0.999_+_-29 TTCCCCG_0.997_-_-61 TTCCGGC_1.000_-_-96		AAATA_0.992_+_-70
BAGE	uc002yiu.1	chr21:11098937	-	chr21:11098737-11099137		0000
BAHCC1	uc002kaf.2	chr17:79373539	+	chr17:79373339-79373539		0000
BAHD1	uc001zlu.2	chr15:40733410	+	chr15:40733210-40733610		0000						TTCCCGG_1.000_-_-41 TTCCCCC_0.943_-_83								CCCCGG_1.000_+_-26_CTGGAA_1.000_-_-16	CCCCGG_1.000_+_-26_CTGGAA_1.000_-_-16
BAI1	uc003ywm.3	chr8:143545376	+	chr8:143545176-143545559		0000			G1/S			TTCCGCG_0.999_-_154						G1/S
BAI2	uc001bto.3	chr1:32229648	-	chr1:32229448-32229848		0000						TTGCCGC_1.000_-_-92 TTGCGCC_1.000_+_102 TTGCGGG_0.993_-_-162		AAATA_0.999_+_-157						CGGCGC_0.595_+_-8_TCTGCA_0.960_+_2 GGCCGC_0.993_+_-170_TTTGCG_0.996_-_-160	GGCCGC_0.993_+_-170_TTTGCG_0.996_-_-160
BAI3	uc010kak.3	chr6:69345631	+	chr6:69345431-69345831		0000			G2			TTCCCCG_1.000_-_143	CAACGG_1.000_+_156					G2	TTTGGA_0.982_+_129 TTGGAA_0.984_+_130
BAIAP2	uc002jzg.2	chr17:79008946	+	chr17:79008746-79009054		0000			G1/S						G1/S			M/G1
BAIAP2L1	uc003upj.3	chr7:98030427	-	chr7:98030227-98030627		0000
BAIAP2L2	uc003auw.3	chr22:38506676	-	chr22:38506532-38506876		0000													ATTGAA_1.000_+_-125
BAIAP3	uc002clk.2	chr16:1384504	+	chr16:1384304-1384662		0000
BAK1	uc011drj.1	chr6:33548070	-	chr6:33547870-33548270		0000
BAMBI	uc001iuj.1	chr10:28966423	+	chr10:28966223-28966623		0000			G1/S					AAATA_1.000_-_-1				G1/S
BANF1	uc001ogo.3	chr11:65769549	+	chr11:65769349-65769749		0000					CTTGAA_0.159_-_-77
BANF2	uc010zrs.1	chr20:17674319	+	chr20:17674119-17674333		0000								AAACA_0.995_-_-106
BANK1	uc010ill.3	chr4:102711763	+	chr4:102711563-102711963		0000
BANP	uc002fkq.3	chr16:87985037	+	chr16:87984837-87985237		0000			G2/M			TTCCCGC_1.000_+_127		AAACA_1.000_+_55				G2/M
BAP1	uc003ddx.3	chr3:52444009	-	chr3:52443894-52444209		0000						TTCCCGC_1.000_-_106	CAACGG_1.000_-_1
BARD1	uc021vwf.1	chr2:215674428	-	chr2:215674293-215674628	18.2575	1111			G1/S						G1/S		G1/S	G1/S
BARHL1	uc004cbp.1	chr9:135457992	+	chr9:135457792-135458184		0000					TTTAAA_0.377_+_-192	TTGGCCC_1.000_+_27 TTGGGGG_1.000_-_48 TTGGCGC_1.000_+_-93 TTGGGGG_0.995_+_145		AAATA_1.000_-_-175					TTTGGA_0.997_+_3	GGCGCG_0.990_+_-29_TCTGCA_1.000_-_-19	GGCGCG_0.990_+_-29_TCTGCA_1.000_-_-19
BARHL2	uc001dns.3	chr1:91182794	-	chr1:91182752-91182994		0000						TTGCCGC_0.980_-_-62		AAACA_0.997_-_-36 AAACA_0.988_-_-45						CGGGGC_0.490_+_-4_GCTGAA_0.998_+_6
BARX1	uc010mrh.3	chr9:96717608	-	chr9:96717428-96717808		0000						TTGCCCG_0.976_-_-63 TTGGGGG_0.971_+_-116
BARX2	uc001qfc.4	chr11:129245880	+	chr11:129245680-129245930		0000
BASP1	uc003jfx.3	chr5:17217749	+	chr5:17217549-17217949		0000							CAACTG_0.985_+_28							GGCGGC_1.000_+_15_TTGGAG_0.984_-_25	GGCGGC_1.000_+_15_TTGGAG_0.984_-_25
BATF	uc001xrr.3	chr14:75988783	+	chr14:75988583-75988983		0000				TTTGAA_0.994_-_-142	TTTGAA_0.994_-_-142	TTGGGGC_0.968_-_24 TTCCGCC_1.000_+_-39		AAATA_0.999_-_-72 AAACA_1.000_-_-188					TGTGAA_0.998_-_-106 TTTGAA_0.994_-_-142 TTTCAA_0.983_+_-143 ATTGAA_0.988_+_-164
BATF2	uc001ocf.1	chr11:64764517	-	chr11:64764386-64764717		0000					TTTAAA_0.728_+_43 TAGGAA_0.853_+_-65
BATF3	uc001hjl.2	chr1:212873327	-	chr1:212873127-212873527		0000													TCTGAA_0.961_-_-137
BAX	uc002plh.1	chr19:49458116	+	chr19:49457916-49458185		0000						TTGCGGG_1.000_+_-41
BAZ1A	uc001wsk.3	chr14:35344853	-	chr14:35344653-35345053		0000				TTTGAG_1.000_-_107	CTTGAA_0.607_-_-141 TTTGAG_1.000_-_107			AAACA_1.000_+_110					TTTGAG_1.000_-_107 TCTGAA_1.000_+_126
BAZ1B	uc003tyc.3	chr7:72936615	-	chr7:72936415-72936815	7.25	0111						TTGGCCG_0.992_+_1							TTTCAA_1.000_+_40 ATTGAA_1.000_-_41 TCTGAA_1.000_-_-171	TCCCGC_1.000_+_30_TTGAAA_1.000_-_40	TCCCGC_1.000_+_30_TTGAAA_1.000_-_40
BAZ2A	uc001slq.1	chr12:57030163	-	chr12:57029969-57030363	6.625	1001					TTTGAT_0.560_+_70			AAATA_0.999_-_-86
BAZ2B	uc002uao.3	chr2:160473112	-	chr2:160472912-160473312		0000				TTTGAG_1.000_-_-132 TAGGAA_1.000_+_138	TTTGAG_1.000_-_-132 TAGGAA_1.000_+_138	TTCCGCC_0.999_-_161		AAACA_1.000_+_-36 AAACA_1.000_+_-181					TTGGAA_1.000_+_-54 TTGGAA_0.987_+_-114 ATTGAA_1.000_-_121 TTTGAG_1.000_-_-132 TTTGCA_0.918_-_-138 TTTTAA_0.954_+_-176
BBC3	uc010xyl.2	chr19:47736023	-	chr19:47735859-47736223		0000			G1/S									G1/S
BBIP1	uc010qrf.1	chr10:112679124	-	chr10:112678924-112679324		0000													GTTGAA_0.983_+_103
BBOX1	uc001mre.1	chr11:27062508	+	chr11:27062308-27062708		0000
BBS1	uc001oij.1	chr11:66278118	+	chr11:66277918-66278130		0000					TTTGTA_0.205_+_-70
BBS10	uc001syd.1	chr12:76742222	-	chr12:76742138-76742422		0000			G1/S							G1/S
BBS12	uc003ieu.3	chr4:123653856	+	chr4:123653656-123654056		0000
BBS2	uc010ccg.2	chr16:56554008	-	chr16:56553808-56554208		0000			S-phase						S-phase
BBS4	uc010ukv.2	chr15:72978519	+	chr15:72978319-72978568		0000			G1/S									G1/S
BBS7	uc003iee.2	chr4:122791652	-	chr4:122791468-122791852		0000														TCCGCC_0.670_+_-95_ATTGGA_0.993_+_-85
BBS9	uc003tdn.1	chr7:33169151	+	chr7:33168951-33169351		0000						TTCGCCC_0.966_-_32
BBX	uc010hpr.3	chr3:107241782	+	chr3:107241582-107241982		0000			M/G1			TTGGCCC_0.986_-_-24	TAACGG_1.000_+_-68	AAACA_1.000_-_9 AAACA_0.978_-_-56 AAACA_1.000_-_-78 AAATA_1.000_+_-135		M/G1	G1/S		TTAGAA_1.000_+_-140
BC007896	uc002erg.1	chr16:67183118	+	chr16:67182918-67183179		0000
BC010030	uc003gox.1	chr4:16228285	+	chr4:16228085-16228369		0000
BC018860	uc011mfh.2	chrM:5901	+	chrM:5701-6101		0000				TTCGAA_0.991_+_-112	TTCGAA_0.991_+_-112								TTTGCA_0.999_+_-106 TTCGAA_0.991_+_-112 TTCGAA_0.991_-_-112 ATTGAA_0.999_-_-179
BC049386	uc002yty.3	chr21:35796264	-	chr21:35796137-35796464		0000
BC068290	uc010vgb.2	chr16:33784510	+	chr16:33784310-33784530		0000						TTGCCCC_1.000_+_11
BC104003	uc009yqb.1	chr11:64883874	+	chr11:64883674-64883913		0000
BC150535	uc002fyz.2	chr17:4693628	-	chr17:4693591-4693828		0000
BCAM	uc002ozu.3	chr19:45312337	+	chr19:45312137-45312381		0000
BCAN	uc001fpo.3	chr1:156611739	+	chr1:156611539-156611939		0000						TTCCCCC_0.996_-_125
BCAP29	uc011kma.1	chr7:107221203	+	chr7:107221003-107221217		0000													TGTGAA_0.989_+_2
BCAP31	uc004fid.2	chrX:152989549	-	chrX:152989349-152989749		0000
BCAR1	uc002fdw.3	chr16:75299905	-	chr16:75299734-75300105		0000						TTGGCCG_0.970_-_162								TCGCGG_0.228_+_83_TCTGAG_0.928_+_93
BCAR3	uc001dqa.3	chr1:94147385	-	chr1:94147185-94147585		0000						TTGCGGC_0.977_-_-53	CAACTG_0.987_-_-41							GCCGCG_0.897_+_-61_TTTGCG_0.990_-_-51 GCGCCG_0.982_+_-22_TCTGAG_0.970_-_-12	GCGCCG_0.982_+_-22_TCTGAG_0.970_-_-12
BCAS1	uc010zzc.2	chr20:52687304	-	chr20:52687104-52687504		0000								AAACA_0.992_-_153
BCAS2	uc001efa.3	chr1:115124265	-	chr1:115124212-115124465	9.21	0010
BCAS3	uc002iyv.4	chr17:58755171	+	chr17:58754971-58755371		0000				TAGGAA_1.000_+_19 TAGGAA_0.962_-_-84	TAGGAA_1.000_+_19 TAGGAA_0.962_-_-84			AAACA_1.000_+_56 AAACA_0.998_-_-139					TTTGGA_1.000_-_53 TTTGCA_1.000_+_-189
BCAS4	uc002xvp.1	chr20:49411466	+	chr20:49411266-49411530		0000
BCAT1	uc010six.2	chr12:25056009	-	chr12:25055922-25056209		0000
BCAT2	uc010emi.2	chr19:49314320	-	chr19:49314264-49314520		0000						TTCCGGC_0.956_-_-6
BCCIP	uc001ljb.4	chr10:127512103	+	chr10:127511903-127512126		0000
BCDIN3D	uc001rvh.3	chr12:50236912	-	chr12:50236870-50237112		0000
BCHE	uc003fem.4	chr3:165555253	-	chr3:165555053-165555453		0000				CTTGAA_0.998_-_-34	CTTGAA_0.998_-_-34	TTCCCCG_0.915_+_86	CAACTG_1.000_-_7						CTTGAA_0.998_-_-34 TTTCAA_1.000_+_-35 TTTGCA_0.958_-_117 TCTGAA_0.986_+_160
BCKDHA	uc002oqq.3	chr19:41903693	+	chr19:41903493-41903732		0000
BCKDHB	uc003pje.2	chr6:80816343	+	chr6:80816143-80816410	7.47	0001
BCKDK	uc010cai.3	chr16:31119661	+	chr16:31119461-31119861		0000
BCL10	uc021opd.1	chr1:85742587	-	chr1:85742387-85742787		0000
BCL11A	uc002sab.3	chr2:60780633	-	chr2:60780433-60780833		0000			G1/S	TTTGTA_1.000_+_68 CTTGAA_1.000_+_-102 CTTGAA_1.000_-_-131	TTTGTA_1.000_+_68 CTTGAA_1.000_+_-102 CTTGAA_1.000_-_-131			AAATA_1.000_-_75 AAATA_1.000_-_86 AAATA_1.000_-_117 AAACA_1.000_-_-167				G1/S	TTTTAA_0.985_-_17 TTTGTA_1.000_+_68 TTAGAA_1.000_-_78 TTTGGA_1.000_+_89 TTTGAC_1.000_-_96 CTTGAA_1.000_+_-102 CTTGAA_1.000_-_-131 TTAGAA_1.000_-_140 TGTGAA_1.000_+_160
BCL11B	uc001ygb.3	chr14:99737822	-	chr14:99737622-99738022		0000			M/G1	TTTAAA_0.991_+_-83 TTTGAA_0.955_+_-128 CTTGAA_0.999_-_-165	CTTGAA_0.999_-_-165 TTTAAA_0.991_+_-83 TTCGAA_0.103_+_-99 TTTGAA_0.955_+_-128			AAACA_0.998_+_34 AAACA_0.993_+_39 AAATA_1.000_+_68 AAATA_1.000_-_-87				M/G1	TTTGCA_1.000_+_29 TTTGCA_0.999_-_31 TTTAAA_0.991_+_-83 TTTAAA_0.991_-_-83 TTTTAA_0.992_+_-84 TTTGAA_0.955_+_-128 CTTGAA_0.999_-_-165 TTTGCA_1.000_-_-183
BCL2	uc002liv.1	chr18:60986613	-	chr18:60986413-60986813		0000			S-phase		TTTGAA_0.387_-_87 TTTGTA_0.882_-_157							S	TTTTAA_0.996_-_193
BCL2A1	uc002bfc.4	chr15:80263643	-	chr15:80263461-80263843		0000					TTTAAA_0.263_+_-36			AAACA_0.989_+_47					TTTGCA_0.991_-_44
BCL2L1	uc002wwn.3	chr20:30310656	-	chr20:30310456-30310856		0000				TTTGTA_1.000_-_178	TTTGTA_1.000_-_178	TTCCGGG_1.000_+_189							TTTGTA_1.000_-_178
BCL2L10	uc002abq.3	chr15:52404972	-	chr15:52404923-52405172		0000
BCL2L11	uc002tgu.1	chr2:111878490	+	chr2:111878290-111878690		0000			G1/S							M/G1		G1/S		CCGCGC_0.249_+_-12_AGTGAA_0.999_-_-2 GCCGCG_0.143_+_-13_TTTCAC_0.992_+_-3
BCL2L12	uc002ppa.3	chr19:50168398	+	chr19:50168198-50168598	5.7	0010
BCL2L13	uc011agk.2	chr22:18121484	+	chr22:18121284-18121684		0000
BCL2L14	uc001rac.3	chr12:12223877	+	chr12:12223677-12224077		0000
BCL2L15	uc001edx.3	chr1:114430169	-	chr1:114429997-114430369		0000					TTTGAA_0.155_+_17			AAATA_0.988_-_-181					TTTTAA_0.909_+_101
BCL2L2-PABPN1	uc001wjg.4	chr14:23775970	+	chr14:23775770-23776170		0000													TTTGCA_0.999_+_-57	CGCCCC_1.000_+_-34_TCTGGA_1.000_+_-24 GCGGGC_0.999_+_155_TTGGAG_0.998_+_165 GGCGGG_0.999_+_154_GTTGGA_0.999_+_164	CGCCCC_1.000_+_-34_TCTGGA_1.000_+_-24 GCGGGC_0.999_+_155_TTGGAG_0.998_+_165 GGCGGG_0.999_+_154_GTTGGA_0.999_+_164
BCL3	uc010xxe.2	chr19:45251977	+	chr19:45251777-45252047		0000			M/G1							M/G1				CGCCCC_0.999_+_-52_TTTGTC_1.000_-_-42	CGCCCC_0.999_+_-52_TTTGTC_1.000_-_-42
BCL6	uc003frq.2	chr3:187463513	-	chr3:187463313-187463713		0000			G1/S			TTCCCGG_1.000_-_-142						G1/S
BCL6B	uc010clt.1	chr17:6926368	+	chr17:6926168-6926568		0000			G2							G2
BCL7A	uc001ubo.3	chr12:122459860	+	chr12:122459660-122459997		0000			S-phase			TTCCGGC_0.994_-_129						S		GGCCCC_0.563_+_-49_TTTGTG_0.997_+_-39
BCL7B	uc003tyf.2	chr7:72972065	-	chr7:72971908-72972265		0000														CCCCGG_0.553_+_105_TTGGGA_0.999_+_115
BCL7C	uc021tgq.1	chr16:30905399	-	chr16:30905265-30905599		0000						TTGGCCG_1.000_-_11								CCGGCC_0.988_+_-119_CTGGAA_0.934_-_-109	CCGGCC_0.988_+_-119_CTGGAA_0.934_-_-109
BCL9	uc001epq.3	chr1:147013181	+	chr1:147012981-147013381		0000			M/G1	TTTGAT_1.000_+_136	TTTGAT_1.000_+_136	TTCCCCC_1.000_+_121		AAACA_1.000_-_-33 AAACA_1.000_+_81		M/G1			TGTGAA_1.000_+_9 TCTGAA_1.000_-_-126 TTTGCA_1.000_+_-132 TTTGAT_1.000_+_136
BCL9L	uc001pug.3	chr11:118781613	-	chr11:118781413-118781813		0000
BCLAF1	uc011ede.1	chr6:136610989	-	chr6:136610789-136611189		0000			G2						G2		G1/S
BCMO1	uc002fgm.1	chr16:81272295	+	chr16:81272095-81272495		0000
BCO2	uc001pne.1	chr11:112046207	+	chr11:112046007-112046324		0000
BCOR	uc004dem.4	chrX:39956719	-	chrX:39956519-39956919		0000
BCORL1	uc022cdu.1	chrX:129139163	+	chrX:129138963-129139207		0000			G1/S	TAGGAA_0.993_-_-174	TTTGAT_0.728_+_-27 TAGGAA_0.993_-_-174							G1/S
BCR	uc002zwx.3	chr22:23522551	+	chr22:23522351-23522751		0000														CGCGGC_0.606_+_66_TCTTAA_0.983_-_76 GCGCGG_0.502_+_65_CTTAAA_0.984_-_75 GCGCGG_0.502_+_65_TTTAAG_0.984_+_75 GGCGCG_0.393_+_64_CTTTAA_0.983_+_74
BCS1L	uc010fvu.3	chr2:219524378	+	chr2:219524178-219524578		0000						TTCCCGC_0.997_-_-12
BDH1	uc003fxs.3	chr3:197282858	-	chr3:197282658-197283058		0000
BDH2	uc003hwz.3	chr4:104021024	-	chr4:104020824-104021224		0000					TTTGTA_0.837_-_-27 TAGGAA_0.214_-_91
BDKRB1	uc001yfh.3	chr14:96722546	+	chr14:96722346-96722746		0000			G2/M									G2/M
BDKRB2;BDKRB2	uc010avl.2	chr14:96671134	+	chr14:96670934-96671156		0000				CTTGAA_1.000_+_15	CTTGAA_1.000_+_15	TTCCCCC_0.999_-_-26							CTTGAA_1.000_+_15 TTTCAA_1.000_-_16
BDNF	uc009yje.3	chr11:27722600	-	chr11:27722583-27722800		0000				TAGGAA_1.000_-_-72	TAGGAA_1.000_-_-72	TTCGCGC_1.000_-_-41		AAACA_0.975_-_-17 AAACA_0.991_-_-31					ATTGAA_1.000_+_-78	GGGGGC_0.998_+_-116_ATTGAT_0.999_-_-106	GGGGGC_0.998_+_-116_ATTGAT_0.999_-_-106
BDP1	uc003kbn.1	chr5:70751441	+	chr5:70751241-70751641		0000
BEAN1	uc021tjn.1	chr16:66461199	+	chr16:66460999-66461399		0000						TTCCCGC_0.996_-_32 TTCCCGC_0.931_-_62
BECN1	uc002ibn.2	chr17:40976310	-	chr17:40976110-40976510		0000						TTCCCGG_0.995_-_18
BEGAIN	uc010txa.2	chr14:101034407	-	chr14:101034261-101034607		0000
BEND5	uc001crx.4	chr1:49242547	-	chr1:49242503-49242747		0000			S-phase			TTCCGCG_0.996_+_-156						S
BEND7	uc001imo.4	chr10:13544976	-	chr10:13544776-13545176		0000
BEST1	uc010rlr.1	chr11:61717355	+	chr11:61717155-61717555		0000
BEST2	uc002mux.3	chr19:12863406	+	chr19:12863206-12863406		0000
BEST3	uc010stm.2	chr12:70093196	-	chr12:70092996-70093396		0000				TTTGAA_0.998_-_-120	TTTGAA_0.998_-_-120 TTTGAA_0.390_+_165 TTTGTA_0.646_-_193			AAACA_1.000_+_1 AAACA_0.993_+_23 AAACA_1.000_-_-43					TTTGAA_0.998_-_-120
BEST4	uc001cmm.3	chr1:45253426	-	chr1:45253377-45253626		0000
BET1	uc003unf.1	chr7:93633690	-	chr7:93633528-93633890		0000								AAACA_0.980_-_10
BET1L	uc001loe.2	chr11:207422	-	chr11:207321-207622		0000
BET3L	uc011ebh.2	chr6:116866773	-	chr6:116866677-116866973		0000			G1/S		TTTGAG_0.359_-_-20					G1/S			TGTGAA_0.975_-_-193
BEX1	uc004ejt.1	chrX:102319168	-	chrX:102318968-102319368		0000
BEX2	uc022cbn.1	chrX:102565883	-	chrX:102565683-102566083		0000
BEX4	uc004ejw.4	chrX:102470019	+	chrX:102469819-102470219		0000			S-phase									S
BEX5	uc004eir.3	chrX:101410986	-	chrX:101410786-101411186		0000
BFAR	uc002dco.3	chr16:14726667	+	chr16:14726467-14726867		0000			S-phase									S
BFSP1	uc002wpo.3	chr20:17512013	-	chr20:17511974-17512213		0000								AAATA_0.990_-_-43
BFSP2	uc003epn.1	chr3:133118789	+	chr3:133118589-133118927		0000					TTTGAT_0.319_-_-87
BGLAP	uc001fnt.3	chr1:156211950	+	chr1:156211750-156212022		0000						TTGGGGG_0.998_-_-92		AAATA_1.000_+_-87
BGN	uc004fhr.2	chrX:152760346	+	chrX:152760146-152760546		0000				TTTGAA_0.997_+_-76	TTTGAA_0.997_+_-76								TTTGAA_0.997_+_-76
BHLHA15	uc003upf.1	chr7:97841567	+	chr7:97841367-97841621		0000
BHLHA9	uc021tnd.1	chr17:1173857	+	chr17:1173657-1173857		0000
BHLHB9	uc011mrv.2	chrX:102000906	+	chrX:102000706-102001106		0000
BHLHE22	uc003xvi.3	chr8:65492794	+	chr8:65492594-65492994		0000				TTTGAT_0.995_+_160 CTTGAA_1.000_+_180	TTTGAT_0.995_+_160 CTTGAA_1.000_+_180	TTGCGGC_1.000_+_-5	CAACTG_1.000_-_-156	AAACA_1.000_-_19 AAACA_1.000_+_-120 AAACA_0.993_-_158					TCTGAA_1.000_-_-12 TTTTAA_1.000_+_31 TCTGAA_0.999_-_-35 TTTTAA_1.000_-_46 TATGAA_1.000_-_99 TTTGCA_1.000_-_-123 TTTGAT_0.995_+_160 CTTGAA_1.000_+_180
BHLHE23	uc002yeb.2	chr20:61638387	-	chr20:61638187-61638587		0000														TCCCCC_0.747_+_-8_TTGGAC_0.956_+_2
BHLHE40	uc011asw.2	chr3:5021096	+	chr3:5020896-5021296		0000					TTTGAG_0.344_-_150	TTGGGGG_0.997_-_131	CAACTG_0.996_+_135							CCCGCC_1.000_+_11_TGAGAA_0.999_-_21	CCCGCC_1.000_+_11_TGAGAA_0.999_-_21
BHLHE41	uc001rhb.3	chr12:26278003	-	chr12:26277803-26278203		0000			G1/S				CAACTG_0.999_+_134	AAACA_1.000_+_33 AAACA_1.000_-_-163				G1/S	TGTGAA_1.000_-_141 TTTCAA_1.000_+_148 GTTGAA_1.000_-_149
BHMT	uc003kfu.4	chr5:78407603	+	chr5:78407403-78407708		0000
BHMT2	uc003kft.3	chr5:78365546	+	chr5:78365443-78365605		0000
BICC1	uc001jki.1	chr10:60272903	+	chr10:60272703-60272903		0000			G2/M							G2/M
BICD1	uc001rkv.3	chr12:32260184	+	chr12:32259984-32260265		0000
BICD2	uc004asp.1	chr9:95527083	-	chr9:95527026-95527283		0000
BID	uc010grc.1	chr22:18257431	-	chr22:18257231-18257631		0000
BIK	uc003bdk.3	chr22:43506753	+	chr22:43506553-43506953		0000
BIN1	uc010yzg.2	chr2:127864903	-	chr2:127864703-127865103		0000			G1/S	TTTAAA_1.000_+_89	TTTAAA_1.000_+_89							G1/S	TTTAAA_1.000_+_89 TTTAAA_1.000_-_89 TTTTAA_1.000_-_90
BIN2	uc009zlz.3	chr12:51717938	-	chr12:51717886-51718138		0000
BIN3	uc003xcl.3	chr8:22526661	-	chr8:22526564-22526861		0000						TTCCGGG_0.990_+_-19							GTTGAA_0.998_+_23
BIRC2	uc001pgy.3	chr11:102217965	+	chr11:102217765-102218165		0000			G2/M						G2/M
BIRC3	uc001pgx.3	chr11:102188180	+	chr11:102187980-102188380	7.19	0100			G2							G2	G2/M	G2
BIRC5	uc010dhl.1	chr17:76210276	+	chr17:76210076-76210326	17.6925	1111			G2/M		TTTGAG_0.110_-_-193				G2/M	M/G1	G2/M	M/G1
BIRC6	uc010ezu.3	chr2:32582095	+	chr2:32581895-32582229		0000			M/G1			TTCCGGC_0.998_+_98 TTGCCCC_1.000_+_118				M/G1				GGCGCC_1.000_+_83_AGTGAA_0.999_-_93	GGCGCC_1.000_+_83_AGTGAA_0.999_-_93
BIRC7	uc010gkc.1	chr20:61867275	+	chr20:61867075-61867448		0000
BIRC8	uc002qbk.3	chr19:53794875	-	chr19:53794675-53795075		0000
BIVM-ERCC5	uc001vpt.3	chr13:103459495	+	chr13:103459295-103459617		0000
BLCAP	uc021wdf.1	chr20:36156083	-	chr20:36155883-36156283		0000
BLID	uc001pyf.3	chr11:121986923	-	chr11:121986723-121987123		0000			G2							G2
BLK	uc003wty.3	chr8:11351520	+	chr8:11351320-11351720		0000					TTTAAA_0.293_+_-49
BLM	uc002bpr.3	chr15:91260578	+	chr15:91260378-91260778	26.2875	1111			S-phase			TTCCCGC_0.994_-_46			S-phase		G1/S		TTTGGA_0.945_+_54
BLMH	uc002hez.2	chr17:28619184	-	chr17:28618984-28619384		0000
BLNK	uc001kme.4	chr10:98031333	-	chr10:98031155-98031533		0000					TTTGTA_0.235_-_-159			AAACA_0.999_-_26 AAACA_0.999_+_-30
BLOC1S1	uc001shi.3	chr12:56109817	+	chr12:56109617-56109835		0000
BLOC1S2	uc001kqw.1	chr10:102046439	-	chr10:102046416-102046639	6.61	0001
BLOC1S3	uc002pax.4	chr19:45682002	+	chr19:45681802-45682202	7.98333	1011
BLVRA	uc003tir.3	chr7:43798271	+	chr7:43798071-43798471		0000
BLVRB	uc002onw.2	chr19:40971725	-	chr19:40971595-40971925		0000
BLZF1	uc001gfw.3	chr1:169337193	+	chr1:169336993-169337393	6.34	1000						TTCCGGG_0.996_-_30
BMF	uc001zkw.3	chr15:40401075	-	chr15:40400875-40401275		0000						TTGCGGG_1.000_+_-30 TTCCCGG_0.985_-_192		AAACA_1.000_+_1 AAATA_1.000_-_-7 AAACA_1.000_-_-33					TTGGAA_1.000_+_-3 TTTGGA_1.000_+_-4	CCGGGC_0.817_+_127_TTGGAT_0.981_+_137 GCCGGG_0.760_+_126_GTTGGA_0.989_+_136
BMP1	uc011kzc.2	chr8:22022652	+	chr8:22022452-22022852		0000
BMP10	uc002sez.1	chr2:69098649	-	chr2:69098490-69098849		0000				TTTGTA_1.000_-_-138	TTTGTA_1.000_-_-138			AAACA_1.000_+_-98 AAATA_0.997_+_-118 AAACA_1.000_-_-142					TTGGAA_1.000_-_44 TTTGGA_1.000_-_45 TTTTAA_1.000_-_-125 TTTGTA_1.000_-_-138
BMP15	uc011mnw.2	chrX:50653734	+	chrX:50653534-50653783		0000				CTTGAA_0.994_-_44	CTTGAA_0.994_-_44								TTTCAA_0.981_+_43 CTTGAA_0.994_-_44
BMP2	uc002wmu.1	chr20:6748744	+	chr20:6748544-6748944		0000			G2/M						G2/M	G2
BMP2K	uc003hlk.3	chr4:79697531	+	chr4:79697331-79697697		0000
BMP3	uc003hmg.4	chr4:81952118	+	chr4:81951918-81952318		0000
BMP4	uc010aoh.3	chr14:54421270	-	chr14:54421070-54421470		0000					CTTGAA_0.101_+_-62	TTCCCCC_0.999_-_-5 TTCGGCC_1.000_-_89	CAACGG_0.999_+_-22
BMP5	uc011dxf.2	chr6:55740375	-	chr6:55740175-55740575		0000				CTTGAA_1.000_+_1 TTTGAA_1.000_-_-66 CTTGAA_1.000_-_89 CTTGAA_0.986_+_117	CTTGAA_0.986_+_117 CTTGAA_1.000_+_1 TTTGAA_1.000_-_-66 CTTGAA_1.000_-_89			AAATA_1.000_-_18 AAACA_1.000_+_106 AAATA_0.994_-_141					CTTGAA_1.000_+_1 ATTGAA_1.000_+_65 TTTGAA_1.000_-_-66 TTTCAA_1.000_+_-67 TTTCAA_0.999_+_88 CTTGAA_1.000_-_89 CTTGAA_0.986_+_117
BMP6	uc003mxu.4	chr6:7727010	+	chr6:7726810-7727188		0000
BMP7	uc002xyc.3	chr20:55841707	-	chr20:55841507-55841907		0000			G1/S	TTCGAG_0.971_-_-44	TTCGAG_0.971_-_-44			AAACA_0.987_+_-150				G1/S
BMP8A	uc001cdi.3	chr1:39957317	+	chr1:39957117-39957517		0000
BMP8B	uc001cea.1	chr1:40254533	-	chr1:40254333-40254733		0000
BMPER	uc011kap.2	chr7:33944522	+	chr7:33944322-33944722		0000
BMPR1A	uc001kdy.3	chr10:88516395	+	chr10:88516195-88516595		0000						TTCGCCC_0.999_-_186 TTCCGCC_0.999_+_-193							TTGGAA_1.000_+_17	CGGCGG_0.998_+_-1_TCTGCA_0.962_-_9	CGGCGG_0.998_+_-1_TCTGCA_0.962_-_9
BMPR1B	uc003htm.4	chr4:95679127	+	chr4:95678927-95679327		0000			M/G1							M/G1				GCGGCC_0.895_+_-27_GTTGAC_0.908_+_-17
BMPR2	uc010ftr.3	chr2:203241049	+	chr2:203240849-203241249		0000														CGCCGC_0.980_+_-132_TCTGCA_0.932_+_-122	CGCCGC_0.980_+_-132_TCTGCA_0.932_+_-122
BMS1	uc001jaj.3	chr10:43277953	+	chr10:43277753-43278153	7.1	0100
BMX	uc004cwx.4	chrX:15518899	+	chrX:15518699-15519099		0000				TTTGAT_0.983_-_-124	TTTGAT_0.983_-_-124 TTTGTA_0.478_-_-189	TTGGGGG_0.964_+_11		AAACA_0.970_+_-186					ATTGAA_0.935_-_-73 TTTGAT_0.983_-_-124
BNC1	uc002bjt.1	chr15:83953468	-	chr15:83953380-83953668		0000
BNC2	uc003zmm.3	chr9:16870786	-	chr9:16870646-16870986		0000														CCGGCG_0.996_+_-91_TGTAAA_1.000_+_-81 CCGGCG_0.996_+_-91_TTTACA_1.000_-_-81 GGGGGC_1.000_+_108_CTTGAC_1.000_+_118	CCGGCG_0.996_+_-91_TGTAAA_1.000_+_-81 CCGGCG_0.996_+_-91_TTTACA_1.000_-_-81 GGGGGC_1.000_+_108_CTTGAC_1.000_+_118
BNIP1	uc003mcl.4	chr5:172571444	+	chr5:172571244-172571548		0000
BNIP2	uc010uhc.2	chr15:59981642	-	chr15:59981639-59981842		0000
BNIP3	uc010qut.1	chr10:133795435	-	chr10:133795310-133795635		0000
BNIP3L	uc003xex.1	chr8:26240522	+	chr8:26240322-26240646		0000
BNIPL	uc009wmi.2	chr1:151009028	+	chr1:151008828-151009201		0000				TTTGAA_1.000_+_15	TTTGAA_1.000_+_15			AAACA_1.000_-_12					TTTGAA_1.000_+_15
BOC	uc010hqi.3	chr3:112931374	+	chr3:112931174-112931574		0000
BOD1	uc003mcr.2	chr5:173043666	-	chr5:173043466-173043866		0000													TTTGCA_0.921_-_-40
BOD1L	uc010idr.1	chr4:13629328	-	chr4:13629211-13629528		0000			S-phase			TTCCGGG_0.989_+_-20	CAACGG_0.995_-_21					S
BOK	uc002wbq.3	chr2:242498145	+	chr2:242497945-242498345		0000													TTAGAA_1.000_+_-11 TCTGAA_0.943_+_174
BOLA1	uc001etf.3	chr1:149871154	+	chr1:149870954-149871354		0000
BOLA3	uc002skc.1	chr2:74375039	-	chr2:74375001-74375239		0000
BOLL	uc002uut.2	chr2:198650938	-	chr2:198650738-198651138		0000					TTTGAA_0.741_-_155
BOP1	uc003zbm.3	chr8:145331180	-	chr8:145331153-145331380		0000
BOP1	uc003zbr.1	chr8:145515120	-	chr8:145515052-145515320		0000							CAACGG_0.996_+_-171							CCGCCG_0.986_+_-185_CTTGCA_0.998_+_-175 CGCCGC_0.988_+_-184_TTGCAA_0.998_-_-174 CGCCGC_0.988_+_-184_TTGCAA_0.998_+_-174 GCCGCC_0.994_+_-183_GTTGCA_0.997_-_-173	CCGCCG_0.986_+_-185_CTTGCA_0.998_+_-175 CGCCGC_0.988_+_-184_TTGCAA_0.998_-_-174 CGCCGC_0.988_+_-184_TTGCAA_0.998_+_-174 GCCGCC_0.994_+_-183_GTTGCA_0.997_-_-173
BORA	uc010aen.1	chr13:73302041	+	chr13:73301841-73302188	14.875	1111	1	1	G2/M	TTCGAA_0.998_+_-104 TTTGAA_0.998_+_-157	TTTGAA_0.998_+_-157 TTCGAA_0.998_+_-104	TTCCGCG_0.996_-_3 TTCGCGG_1.000_+_-67 TTCCGCG_0.975_-_-131				G2/M		G2	TTCGAA_0.998_+_-104 TTCGAA_0.998_-_-104 TTTGGA_1.000_+_-151 TTTGAA_0.998_+_-157
BPGM	uc003vrw.3	chr7:134331530	+	chr7:134331330-134331730		0000			M/G1									M/G1
BPHL	uc003muy.3	chr6:3118925	+	chr6:3118725-3118974		0000
BPI	uc002xib.2	chr20:36932551	+	chr20:36932351-36932613		0000
BPIFA1	uc002wyt.4	chr20:31823801	+	chr20:31823601-31824001		0000								AAATA_1.000_-_-126 AAACA_1.000_-_-183					TTTGGA_1.000_+_-119
BPIFA2	uc002wyo.1	chr20:31755959	+	chr20:31755759-31756159		0000					TTTGAG_0.423_+_-147 CTTGAA_0.555_-_-167			AAATA_0.995_-_-104
BPIFA3	uc002wys.3	chr20:31805134	+	chr20:31804934-31805334		0000
BPIFB1	uc010gej.1	chr20:31870940	+	chr20:31870740-31871140		0000								AAATA_1.000_+_-26
BPIFB2	uc002wyj.3	chr20:31595406	+	chr20:31595206-31595606		0000								AAACA_0.989_+_1 AAACA_0.983_-_-11					TTTGCA_1.000_+_-9
BPIFB3	uc002wym.1	chr20:31643229	+	chr20:31643029-31643229		0000
BPIFB4	uc010zue.2	chr20:31669317	+	chr20:31669117-31669332		0000
BPIFB6	uc010zuc.2	chr20:31619453	+	chr20:31619253-31619453		0000
BPIFC	uc010gwo.2	chr22:32853373	-	chr22:32853373-32853573		0000
BPNT1	uc001hma.3	chr1:220263191	-	chr1:220262991-220263391		0000
BPTF	uc010wqm.1	chr17:65821779	+	chr17:65821579-65821840		0000						TTCCCCC_0.999_+_-167		AAACA_1.000_+_-139
BPY2	uc004fvj.3	chrY:25130409	+	chrY:25130209-25130609		0000					TTTGAG_0.422_-_-185
BPY2	uc004fwi.3	chrY:26764150	+	chrY:26763950-26764350		0000					TTTGAG_0.422_-_-185
BPY2	uc004fws.3	chrY:27198251	-	chrY:27198051-27198451		0000					TTTGAG_0.422_-_-187
BRAF	uc003vwc.4	chr7:140624564	-	chr7:140624503-140624764		0000
BRAP	uc001tsn.4	chr12:112123790	-	chr12:112123596-112123990		0000						TTCCGCC_1.000_-_16
BRAT1	uc003smj.2	chr7:2595392	-	chr7:2595192-2595592		0000
BRCA1	uc010wht.1	chr17:41277500	-	chr17:41277300-41277700	21.195	1111			S-phase			TTCCCGC_1.000_-_71			S-phase		G1/S	G1/S	TTTTAA_0.994_-_89	GCGCGG_1.000_+_69_TCTGTA_0.986_-_79	GCGCGG_1.000_+_69_TCTGTA_0.986_-_79
BRCA2	uc001uua.1	chr13:32889616	+	chr13:32889416-32889816	11.27	1111			G1/S			TTCCGGG_0.991_+_-58						G1/S
BRCC3	uc011mzy.2	chrX:154299694	+	chrX:154299494-154299802		0000
BRD1	uc003biv.3	chr22:50218452	-	chr22:50218252-50218652		0000
BRD2	uc021ywf.1	chr6:32940860	+	chr6:32940704-32941060		0000
BRD3	uc004cew.3	chr9:136933141	-	chr9:136932941-136933341		0000			S-phase									S		GGGCCG_1.000_+_4_TTTGGC_1.000_-_14	GGGCCG_1.000_+_4_TTTGGC_1.000_-_14
BRD4	uc002nar.3	chr19:15391262	-	chr19:15391062-15391462		0000			G2								G2	M/G1
BRD7	uc021thx.1	chr16:50402845	-	chr16:50402685-50403045		0000			G1/S						G1/S
BRD8	uc011cyn.1	chr5:137514358	-	chr5:137514303-137514558	34.095	1111		1	G2			TTGGCCC_0.980_-_46			G2	M/G1	M/G1	G2
BRD9	uc003jbo.3	chr5:892939	-	chr5:892772-893113	10.8967	1011
BRDT	uc001dom.4	chr1:92417708	+	chr1:92417508-92417908		0000													TTGGAA_0.944_+_-15 TTTGGA_0.960_+_-16 TTTTAA_0.976_+_18
BRE	uc002rlu.3	chr2:28113481	+	chr2:28113281-28113681	8.01	0100						TTCGGGC_0.956_-_-135
BRF1	uc001yqr.3	chr14:105767329	-	chr14:105767129-105767529		0000
BRF2	uc003xkk.3	chr8:37707431	-	chr8:37707301-37707631		0000
BRI3	uc003upi.2	chr7:97910978	+	chr7:97910778-97911107		0000						TTCCCCC_0.922_-_-30								CGCGGC_0.546_+_-124_TCTTAA_0.999_-_-114 GCGCGG_0.400_+_-125_CTTAAA_0.999_-_-115 GCGCGG_0.400_+_-125_TTTAAG_0.999_+_-115 GGCGCG_0.254_+_-126_CTTTAA_0.998_+_-116
BRI3BP	uc001uha.1	chr12:125478193	+	chr12:125477993-125478336		0000			S-phase			TTGCGCG_0.953_+_-21						S
BRIP1	uc002izk.2	chr17:59940920	-	chr17:59940720-59941120	13.4	1011		1	G1/S			TTCCCGC_1.000_-_32					G1/S	G1/S
BRIX1	uc003jja.3	chr5:34915819	+	chr5:34915619-34915843	11.7	1111
BRK1	uc003bvb.3	chr3:10157332	+	chr3:10157132-10157385		0000
BRMS1	uc001ohp.1	chr11:66112582	-	chr11:66112382-66112782		0000
BRMS1L	uc001wtl.3	chr14:36295596	+	chr14:36295396-36295722		0000						TTGGGGC_0.982_+_44 TTCCGCG_1.000_+_52								GCGCCG_1.000_+_92_TTTCCA_1.000_-_102 GGCGCC_1.000_+_91_GTGGAA_1.000_+_101	GCGCCG_1.000_+_92_TTTCCA_1.000_-_102 GGCGCC_1.000_+_91_GTGGAA_1.000_+_101
BROX	uc010put.1	chr1:222885905	+	chr1:222885705-222886085		0000						TTGCGGC_0.985_+_-74 TTGCCGC_1.000_+_-93 TTGGGCG_0.999_-_-106								CCCGGG_0.554_+_-23_GTTGAG_0.981_+_-13 GGCCCC_1.000_+_-169_TGTTAA_0.999_-_-159 TGCCGC_1.000_+_-92_TTTGGC_1.000_-_-82	GGCCCC_1.000_+_-169_TGTTAA_0.999_-_-159 TGCCGC_1.000_+_-92_TTTGGC_1.000_-_-82
BRP44	uc001get.3	chr1:167906307	-	chr1:167906246-167906507		0000
BRP44L	uc010kkj.1	chr6:166796486	-	chr6:166796364-166796686		0000
BRPF1	uc003bsg.3	chr3:9773433	+	chr3:9773233-9773633		0000						TTGCCGC_1.000_+_39
BRPF3	uc003olv.4	chr6:36164549	+	chr6:36164349-36164749		0000						TTCCCCC_0.999_+_2 TTCGCGC_0.982_+_-167 TTCGGGG_0.996_-_167
BRS3	uc004ezv.1	chrX:135570124	+	chrX:135569924-135570273		0000				TTTGAA_0.932_+_104	TTTGAA_0.932_+_104		CAACTG_0.915_+_96						TTTGAA_0.932_+_104
BRSK1	uc002qkg.3	chr19:55795533	+	chr19:55795449-55795733		0000
BRSK2	uc001lti.3	chr11:1411128	+	chr11:1410928-1411328		0000						TTCCGCC_0.991_-_125
BRWD1	uc002yxm.3	chr21:40685712	-	chr21:40685512-40685912		0000						TTGCGCG_0.993_+_-93
BRWD3	uc004edx.3	chrX:80065233	-	chrX:80065033-80065433		0000				TTCGAG_1.000_+_115	TTCGAG_1.000_+_115	TTCCGCC_0.977_-_148
BSCL2	uc001nur.4	chr11:62475179	-	chr11:62474979-62475379		0000							CAACTG_1.000_+_56
BSG	uc002lpa.3	chr19:572536	+	chr19:572336-572634		0000					TAGGAA_0.828_-_-151
BSN	uc003cxe.4	chr3:49591921	+	chr3:49591721-49592035		0000														GCGCCG_0.232_+_34_TGTGAG_0.991_+_44
BSND	uc001cye.3	chr1:55464616	+	chr1:55464416-55464816		0000													TTTGAC_0.998_-_-113
BSPH1	uc002phs.1	chr19:48495427	-	chr19:48495338-48495627		0000
BSPRY	uc010muw.3	chr9:116111811	+	chr9:116111611-116111859		0000					TAGGAA_0.493_-_-199
BST1	uc003goh.4	chr4:15704572	+	chr4:15704372-15704767		0000
BST2	uc002ngl.3	chr19:17516384	-	chr19:17516384-17516584		0000					TAGGAA_0.113_-_-85
BSX	uc010rzs.2	chr11:122852379	-	chr11:122852379-122852579		0000
BTAF1	uc001khr.3	chr10:93683735	+	chr10:93683535-93683833	5.83	0010				TTTGAA_1.000_+_-155	TTTGAA_1.000_+_-155								TTTGAA_1.000_+_-155	CGCCCG_1.000_+_-193_TTTGCT_1.000_-_-183	CGCCCG_1.000_+_-193_TTTGCT_1.000_-_-183
BTBD1	uc002bjn.3	chr15:83736106	-	chr15:83735906-83736306		0000						TTCCCGG_0.998_+_105
BTBD10	uc001mkz.3	chr11:13484838	-	chr11:13484638-13485038	7.18	1010			G2		TTCGAG_0.503_+_192							G2
BTBD11	uc001tmk.1	chr12:107712196	+	chr12:107711996-107712396		0000													TTTGCA_0.998_+_6 TTTGCA_1.000_+_-47
BTBD17	uc002jkn.2	chr17:72357958	-	chr17:72357958-72358158		0000														TGGGGC_1.000_+_-169_GTGGAA_1.000_-_-159	TGGGGC_1.000_+_-169_GTGGAA_1.000_-_-159
BTBD2	uc002lup.1	chr19:2015702	-	chr19:2015702-2015902		0000
BTBD6	uc010tyq.2	chr14:105714878	+	chr14:105714678-105715078		0000
BTBD8	uc001doo.3	chr1:92545861	+	chr1:92545661-92546061		0000								AAACA_0.965_+_13
BTBD9	uc010jwx.3	chr6:38607924	-	chr6:38607724-38608124		0000
BTC	uc003hig.2	chr4:75719882	-	chr4:75719682-75720082		0000						TTGCCCC_0.959_-_33		AAATA_0.953_+_120 AAACA_1.000_-_180
BTF3	uc003kcq.1	chr5:72794249	+	chr5:72794049-72794449		0000				TTTGTA_1.000_-_136	TTTGTA_1.000_-_136	TTCCGGC_1.000_+_9 TTCCCGC_1.000_-_183							TTTGTA_1.000_-_136
BTG1	uc001tby.3	chr12:92539673	-	chr12:92539473-92539873	6.31	1000			G2	TTCGAG_0.985_-_186	TTCGAG_0.985_-_186	TTCCCGC_0.999_+_-91		AAACA_1.000_-_-159 AAATA_1.000_+_191		G2	G2			TCCGGG_0.965_+_-171_TTTGTT_1.000_+_-161	TCCGGG_0.965_+_-171_TTTGTT_1.000_+_-161
BTG2	uc001gzq.3	chr1:203274663	+	chr1:203274463-203274734		0000			M/G1							M/G1
BTG3	uc002ykk.3	chr21:18985268	-	chr21:18985068-18985468		0000			G2			TTCCGGG_1.000_+_4 TTCCCGG_0.995_+_-21 TTGGCGC_0.947_-_-32						G2
BTG4	uc001plj.3	chr11:111383079	-	chr11:111382879-111383279		0000													TTGGAA_1.000_+_-103
BTK	uc004ehi.3	chrX:100641212	-	chrX:100641012-100641412		0000				TTTGAA_0.947_-_-158	TTTGAA_0.947_-_-158								TGTGAA_1.000_+_10 TTGGAA_0.999_-_103 TTTGAA_0.947_-_-158 TTTCAA_0.909_+_-159
BTLA	uc003dzb.4	chr3:112218408	-	chr3:112218208-112218608		0000					TTTGAA_0.789_+_-60 TTTAAA_0.208_+_-180								TTTCAA_0.934_-_-59
BTN1A1	uc003nif.4	chr6:26501457	+	chr6:26501257-26501514		0000
BTN2A1	uc021yni.1	chr6:26458152	+	chr6:26457952-26458352		0000			G2									G2
BTN2A2	uc003nhr.3	chr6:26383328	+	chr6:26383128-26383528		0000												G2|S
BTN2A3P	uc011dkl.1	chr6:26422316	+	chr6:26422116-26422346		0000
BTN3A1	uc003nhv.3	chr6:26402464	+	chr6:26402264-26402664	6.23	0100
BTN3A2	uc010jqi.2	chr6:26368405	+	chr6:26368205-26368410		0000			M/G1								M/G1
BTN3A3	uc021ynh.1	chr6:26440699	+	chr6:26440499-26440899		0000			G1/S		TTTGAT_0.110_-_2							G1/S
BTNL2	uc010jty.1	chr6:32374900	-	chr6:32374900-32375100		0000
BTNL3	uc003mmr.3	chr5:180415844	+	chr5:180415644-180416028		0000
BTNL8	uc003mmp.3	chr5:180326076	+	chr5:180325876-180326276		0000					TTTGAA_0.241_-_19
BTNL9	uc003mmt.3	chr5:180467224	+	chr5:180467024-180467424		0000			G2		CTTGAA_0.110_-_-77			AAACA_0.961_-_-38	G2
BTRC	uc001kta.3	chr10:103113824	+	chr10:103113624-103113937		0000					TTTGTA_0.857_-_-81	TTCCCCC_0.968_-_13								GCGGCC_1.000_+_55_TTTGGT_0.998_-_65	GCGGCC_1.000_+_55_TTTGGT_0.998_-_65
BUB1	uc010fkb.3	chr2:111435684	-	chr2:111435572-111435884	13.61	1111			G2/M	TTCGAA_0.994_+_44	TTCGAA_0.994_+_44		CAACGG_0.962_+_-50		G2/M	M/G1	G2/M	G2/M	TTCGAA_0.994_+_44 TTCGAA_0.994_-_44
BUB1B	uc001zkx.4	chr15:40453209	+	chr15:40453009-40453409	20.03	1111	1		G2/M	TTTGAA_1.000_+_38	TTTGAA_1.000_+_38	TTGGCGG_0.987_+_46	TAACGG_1.000_-_30		G2/M	M/G1	G2/M	G2/M	TTTGAA_1.000_+_38 TTTCAA_0.983_-_39	CGCGGG_0.996_+_23_ATTTAA_1.000_-_33 GCGCGG_0.989_+_22_GTTAAA_1.000_+_32 GCGCGG_0.989_+_22_TTTAAC_1.000_-_32	CGCGGG_0.996_+_23_ATTTAA_1.000_-_33 GCGCGG_0.989_+_22_GTTAAA_1.000_+_32 GCGCGG_0.989_+_22_TTTAAC_1.000_-_32
BUB3	uc001lhf.4	chr10:124913759	+	chr10:124913559-124913959	7.47333	1011	1		G2	TTTGAG_1.000_+_12 TTTGAA_1.000_+_95	TTTGAG_1.000_+_12 TTTGAA_1.000_+_95	TTCCGGC_1.000_-_17			G2		G2	G2/M	TTTGAG_1.000_+_12 TTTGAA_1.000_+_95 TTTCAA_0.999_-_96
BUD31	uc003uqg.4	chr7:99006600	+	chr7:99006400-99006800		0000
BV13S6J2.1	uc011krx.2	chr7:142251152	-	chr7:142251137-142251352		0000
BVES	uc003pqx.3	chr6:105584543	-	chr6:105584343-105584743		0000
BYSL	uc003orl.3	chr6:41888964	+	chr6:41888764-41889164		0000
BZRAP1	uc010wnt.2	chr17:56406152	-	chr17:56405952-56406352		0000				TAGGAA_1.000_-_-81	TAGGAA_1.000_-_-81
BZW1	uc010zhg.2	chr2:201677055	+	chr2:201677032-201677130		0000
BZW2	uc011jxx.1	chr7:16685758	+	chr7:16685558-16685958		0000						TTGCGCG_1.000_+_127
C10orf10	uc001jbr.4	chr10:45474330	-	chr10:45474130-45474530		0000					TAGGAA_0.821_-_-28			AAATA_0.997_-_-2 AAACA_0.999_-_-32
C10orf105	uc001jsa.2	chr10:73479578	-	chr10:73479378-73479778		0000						TTGGGGG_0.978_-_-24
C10orf111	uc001inw.3	chr10:15139318	-	chr10:15139118-15139518		0000
C10orf112	uc010qcq.1	chr10:19778022	+	chr10:19777822-19778222		0000
C10orf116	uc001ked.2	chr10:88728187	+	chr10:88727987-88728301		0000			S-phase									S
C10orf125	uc001lmt.2	chr10:135171529	-	chr10:135171511-135171729		0000
C10orf128	uc001jho.4	chr10:50396407	-	chr10:50396381-50396607		0000
C10orf129	uc001kke.3	chr10:96953956	+	chr10:96953756-96954156		0000
C10orf137	uc001lip.1	chr10:127408083	+	chr10:127407883-127408283		0000
C10orf140	uc021pnx.1	chr10:21806751	-	chr10:21806751-21806951		0000						TTCGCCG_0.998_+_-149		AAATA_0.992_-_-39 AAATA_1.000_-_-125					TTTGCA_0.998_-_-32
C10orf2	uc001ksg.2	chr10:102747292	+	chr10:102747200-102747492		0000			M/G1							M/G1
C10orf25	uc001jbv.2	chr10:45496470	-	chr10:45496307-45496670		0000					TAGGAA_0.823_+_137
C10orf26	uc001kwf.4	chr10:104503726	+	chr10:104503526-104503810		0000					TTTGAT_0.686_+_-157	TTCCGGC_0.999_-_-41		AAACA_0.999_+_-18					TTTGAC_0.998_-_-21
C10orf27	uc010qjm.1	chr10:72545157	-	chr10:72544957-72545357		0000
C10orf28	uc009xvy.3	chr10:99894380	+	chr10:99894180-99894580		0000						TTCCGCC_0.997_-_56
C10orf35	uc001jpq.4	chr10:71390002	+	chr10:71389802-71390202		0000														GCGCGC_0.999_+_-18_TGTGAG_1.000_+_-8	GCGCGC_0.999_+_-18_TGTGAG_1.000_+_-8
C10orf46	uc001lds.1	chr10:120514758	-	chr10:120514558-120514958		0000
C10orf54	uc001jsd.3	chr10:73533337	-	chr10:73533196-73533537		0000
C10orf58	uc021puy.1	chr10:82173574	+	chr10:82173374-82173629		0000					TTTGAA_0.757_+_-176 TTTGAG_0.390_-_-196
C10orf62	uc001koa.3	chr10:99349449	+	chr10:99349249-99349649		0000				CTTGAA_0.996_-_53	CTTGAA_0.996_-_53								TTTCAA_0.994_+_52 CTTGAA_0.996_-_53
C10orf76	uc001kui.3	chr10:103815932	-	chr10:103815732-103816132		0000					TTCGAG_0.360_-_121	TTCCCGG_1.000_-_49								GCGCCG_0.016_+_-67_TTAGGA_0.974_+_-57
C10orf88	uc001lgx.2	chr10:124713919	-	chr10:124713719-124714119	11.43	1111
C10orf90	uc001ljq.3	chr10:128210010	-	chr10:128209889-128210210		0000					TTTGAA_0.461_+_80
C10orf99	uc001kcu.3	chr10:85933553	+	chr10:85933353-85933607		0000					CTTGAA_0.449_+_-129
C11orf1	uc001pmd.3	chr11:111749947	+	chr11:111749856-111750147		0000
C11orf10	uc001nsf.3	chr11:61560085	-	chr11:61560030-61560285	15.1625	1111
C11orf2	uc001ocr.1	chr11:64863682	+	chr11:64863482-64863722	7.21	1010						TTCCGGG_0.991_-_-25
C11orf20	uc009ypm.3	chr11:64066817	+	chr11:64066617-64066817		0000
C11orf21	uc001lvv.2	chr11:2323143	-	chr11:2323091-2323274		0000
C11orf24	uc001onr.4	chr11:68039469	-	chr11:68039269-68039669	6.36	0001						TTCCGGC_0.940_+_1
C11orf30	uc009yuj.1	chr11:76156068	+	chr11:76155868-76156268	8	1011	1		S-phase			TTGCCCC_1.000_+_10 TTGGCGG_1.000_+_62 TTCCCGC_1.000_-_-62 TTCGGGG_0.999_-_87 TTGGGGC_0.958_+_191		AAACA_1.000_+_31				S	TCTGAA_1.000_-_17
C11orf31	uc021qjj.1	chr11:57508721	+	chr11:57508521-57508921		0000
C11orf34	uc009yyp.2	chr11:112131583	-	chr11:112131383-112131783		0000					TTTGAA_0.369_-_-121
C11orf41	uc021qfs.1	chr11:33563876	+	chr11:33563676-33564000		0000
C11orf45	uc001qeu.3	chr11:128775592	-	chr11:128775392-128775792		0000
C11orf46	uc001mso.1	chr11:30344648	+	chr11:30344448-30344848		0000
C11orf51	uc001orv.3	chr11:71823822	-	chr11:71823788-71824022	6.295	1010						TTCCCCG_0.997_-_4		AAACA_0.998_+_10
C11orf54	uc001pef.3	chr11:93474792	+	chr11:93474592-93474992		0000
C11orf58	uc001mmk.2	chr11:16760147	+	chr11:16759947-16760325		0000														CGGGGC_0.159_+_-87_TGGGAA_0.908_+_-77
C11orf73	uc001pbu.3	chr11:86013252	+	chr11:86013052-86013452		0000						TTCCGGG_0.993_-_17								TCCCGC_0.000_+_135_TCTGGA_0.976_+_145
C11orf75	uc001pds.4	chr11:93276546	-	chr11:93276346-93276746		0000			S-phase			TTCCCGG_1.000_+_-55 TTCCCGG_0.995_+_60						S
C11orf82	uc001ozt.3	chr11:82612736	+	chr11:82612536-82612936	17.8025	1111			S-phase	TTCGAT_0.991_+_39	TTCGAT_0.991_+_39	TTCCGGC_0.982_+_14			S-phase			G2
C11orf83	uc001nui.4	chr11:62439125	+	chr11:62438925-62439217		0000
C11orf87	uc010rwb.2	chr11:109292845	+	chr11:109292645-109293045		0000						TTCGCCG_0.966_-_8
C11orf9	uc001nsc.1	chr11:61520120	+	chr11:61519920-61520216		0000
C11orf94	uc001nbs.4	chr11:45928833	-	chr11:45928796-45929033		0000
C11orf95	uc010rmv.2	chr11:63536113	-	chr11:63536094-63536313		0000
C12orf10	uc001scp.4	chr12:53693469	+	chr12:53693269-53693521		0000						TTCCGGG_0.953_+_13
C12orf23	uc001tmb.3	chr12:107349543	+	chr12:107349343-107349743		0000
C12orf28	uc001svu.1	chr12:70320436	+	chr12:70320236-70320636		0000							CAACTG_0.999_+_-49	AAATA_1.000_+_0					TTAGAA_0.999_+_-4 TTGGAA_0.974_+_43 TTTGCA_1.000_-_-43
C12orf32	uc001qlh.3	chr12:2986364	+	chr12:2986164-2986564	14.2167	1011			G2	TTTGAA_1.000_+_-49	TTTGAA_1.000_+_-49	TTGGCGC_1.000_+_-42		AAACA_1.000_-_-51	G2				TTTCAA_1.000_-_-48 TTTGAA_1.000_+_-49	GCGGGC_0.003_+_-150_TGGGAA_0.940_+_-140
C12orf39	uc001rfa.1	chr12:21679255	+	chr12:21679055-21679406		0000				TTTAAA_0.962_+_68	TTTAAA_0.962_+_68								TTTAAA_0.962_+_68 TTTAAA_0.962_-_68 TTTTAA_0.994_-_69
C12orf44	uc009zmd.3	chr12:52463757	+	chr12:52463557-52463957		0000
C12orf49	uc009zwm.1	chr12:117175843	-	chr12:117175772-117176043		0000		1
C12orf5	uc001qmp.3	chr12:4430358	+	chr12:4430158-4430437		0000						TTCCGCC_0.913_-_-2 TTGCGCC_0.968_-_-145
C12orf51	uc021reb.1	chr12:112819896	-	chr12:112819696-112820096		0000
C12orf52	uc001tur.1	chr12:113623554	+	chr12:113623354-113623754		0000
C12orf53	uc021quc.1	chr12:6809596	-	chr12:6809396-6809796		0000
C12orf59	uc001qxq.3	chr12:10331556	+	chr12:10331356-10331756		0000			S-phase							S-phase
C12orf62	uc001rwb.1	chr12:50505899	+	chr12:50505699-50506099		0000
C12orf65	uc001uen.3	chr12:123717843	+	chr12:123717643-123718043		0000							TAACGG_1.000_-_-168
C12orf68	uc001rrj.2	chr12:48577365	+	chr12:48577165-48577565		0000								AAACA_0.981_+_26					TTGGAA_1.000_+_22
C12orf69	uc001rck.1	chr12:14967116	-	chr12:14966916-14967316		0000								AAATA_0.953_+_-31
C12orf70	uc010sjq.2	chr12:27619742	+	chr12:27619542-27619942		0000
C12orf73	uc009zuj.2	chr12:104350993	-	chr12:104350793-104351193		0000
C12orf76	uc001tqf.1	chr12:110511439	-	chr12:110511239-110511639		0000					TTCGAT_0.235_-_-101			AAACA_0.999_+_134					TTTGGA_0.974_-_151 TCTGAA_0.992_+_-194
C13orf15	uc001uyi.2	chr13:42031541	+	chr13:42031341-42031741	5.8	0100						TTGGGGC_1.000_+_-57		AAATA_1.000_+_-63
C13orf16	uc001vsa.3	chr13:111973014	+	chr13:111972814-111973214		0000
C14orf1	uc001xrt.3	chr14:76127538	-	chr14:76127338-76127738		0000						TTCCCCG_0.999_+_-88 TTCGGGG_0.979_+_-174								CCCCGG_0.999_+_-86_GTTGTA_1.000_-_-76	CCCCGG_0.999_+_-86_GTTGTA_1.000_-_-76
C14orf101	uc001xck.3	chr14:57046510	+	chr14:57046310-57046632		0000						TTCCGGG_0.967_-_8
C14orf102	uc001xyj.2	chr14:90798481	-	chr14:90798281-90798681		0000
C14orf109	uc010auo.3	chr14:93651374	+	chr14:93651174-93651574		0000						TTCCGGC_0.992_-_-61 TTCCGGC_0.969_+_-72								GCGGGG_0.002_+_-126_TCTGAC_0.906_+_-116
C14orf126	uc010tpk.1	chr14:31926680	-	chr14:31926599-31926880		0000
C14orf129	uc021sbk.1	chr14:96846024	+	chr14:96845824-96846224		0000
C14orf132	uc001yff.4	chr14:96505660	+	chr14:96505460-96505837		0000
C14orf133	uc001xtt.2	chr14:77923983	-	chr14:77923783-77924183		0000
C14orf135	uc001xer.4	chr14:60558628	+	chr14:60558428-60558828		0000
C14orf149	uc001xee.1	chr14:59951073	-	chr14:59951034-59951273		0000
C14orf159	uc001xze.2	chr14:91580978	+	chr14:91580778-91581178		0000
C14orf166	uc010aod.3	chr14:52456227	+	chr14:52456027-52456357		0000				TTTGAG_1.000_+_-104	TTTGAG_1.000_+_-104			AAATA_1.000_-_-106					TTTGAG_1.000_+_-104
C14orf169	uc001xok.1	chr14:73957643	+	chr14:73957443-73957722		0000					TTTAAA_0.214_+_-172									CCGCGC_0.992_+_-20_TGGGAA_0.999_-_-10	CCGCGC_0.992_+_-20_TGGGAA_0.999_-_-10
C14orf176	uc010tlo.2	chr14:21567095	+	chr14:21566895-21567295		0000				TTTGAG_1.000_-_-50 TTCGAG_0.989_-_100 TTTGAA_0.991_+_-197	TTTGAG_1.000_-_-50 TTCGAG_0.989_-_100 TTTGAA_0.991_+_-197	TTGGGGG_0.965_+_-15 TTGGGGC_0.998_-_-94 TTCCCCC_1.000_+_-177		AAACA_1.000_+_37 AAACA_0.997_+_79 AAATA_1.000_+_153					TTTGAG_1.000_-_-50 ATTGAA_1.000_-_142 TTTCAA_0.991_-_-196 TTTGAA_0.991_+_-197	TCCCCC_1.000_+_-176_CTTGGA_0.942_-_-166 TGCCCC_0.999_+_-95_TGTGCA_1.000_-_-85	TCCCCC_1.000_+_-176_CTTGGA_0.942_-_-166 TGCCCC_0.999_+_-95_TGTGCA_1.000_-_-85
C14orf180	uc001yow.1	chr14:105046055	+	chr14:105045855-105046255		0000
C14orf2	uc010aww.2	chr14:104387903	-	chr14:104387703-104388103		0000						TTCCCGG_0.999_+_0 TTCCGCC_0.996_+_-7
C14orf21	uc001wol.1	chr14:24769097	+	chr14:24768897-24769160		0000
C14orf37	uc001xde.3	chr14:58618847	-	chr14:58618647-58619047		0000													TATGAA_0.999_+_-112
C14orf39	uc001xez.4	chr14:60952764	-	chr14:60952564-60952964		0000
C14orf43	uc001xou.3	chr14:74253896	-	chr14:74253696-74254096		0000
C14orf49	uc001yej.1	chr14:95942173	-	chr14:95942158-95942373		0000
C14orf93	uc001wig.3	chr14:23479360	-	chr14:23479160-23479560		0000				TTTGTA_1.000_-_26	TTTGTA_1.000_-_26 TTTGAA_0.809_-_94 TTTAAA_0.332_+_103	TTGCCGG_0.903_+_-20 TTGCGGG_0.995_+_-86 TTCCCCC_0.998_+_167		AAACA_0.982_-_90 AAATA_0.932_+_108					TTTGCA_1.000_+_10 TTTGTA_1.000_-_26 TTTCAA_0.968_+_93
C15orf17	uc002azf.3	chr15:75199462	-	chr15:75199262-75199662		0000
C15orf2	uc001ywo.3	chr15:24920540	+	chr15:24920340-24920740		0000
C15orf23	uc010ucp.2	chr15:40674921	+	chr15:40674721-40675036	6.55	0010		1	G2/M					AAATA_1.000_+_-77	G2/M	M/G1		G2/M
C15orf24	uc001zhm.3	chr15:34394053	-	chr15:34394040-34394253		0000						TTCCGGG_0.980_+_-24
C15orf27	uc002bbq.3	chr15:76352298	+	chr15:76352098-76352498		0000													TTTGCA_0.943_+_154	CCGGCG_0.237_+_15_TCTGCA_0.910_-_25
C15orf29	uc010uca.1	chr15:34502297	-	chr15:34502097-34502497		0000				TTTGAA_1.000_+_31	TTTGAA_1.000_+_31								TTTGAA_1.000_+_31	CGCGGC_0.999_+_21_TTCAAA_1.000_-_31 GCGGCC_0.998_+_22_ATTCAA_1.000_-_32	CGCGGC_0.999_+_21_TTCAAA_1.000_-_31 GCGGCC_0.998_+_22_ATTCAA_1.000_-_32
C15orf38-AP3S2	uc002bos.4	chr15:90456222	-	chr15:90456067-90456422		0000				TTTAAA_0.920_+_-4	TTTAAA_0.920_+_-4								TTTAAA_0.920_+_-4 TTTAAA_0.920_-_-4
C15orf42	uc021sug.1	chr15:90118817	+	chr15:90118617-90118817	20.9475	1111			G2			TTGGGGG_0.998_-_-150				G2		G2
C15orf44	uc010ujc.2	chr15:65903627	-	chr15:65903486-65903827		0000
C15orf48	uc001zvg.3	chr15:45722762	+	chr15:45722562-45722962		0000
C15orf55	uc001zif.3	chr15:34638065	+	chr15:34637865-34638142		0000
C15orf58	uc002bpc.3	chr15:90777486	+	chr15:90777286-90777686		0000
C15orf61	uc002aqs.3	chr15:67813521	+	chr15:67813321-67813586		0000			G1/S									G1/S
C15orf62	uc010bby.3	chr15:41062158	+	chr15:41061958-41062358		0000								AAACA_0.995_+_16
C16orf3	uc002fqk.1	chr16:90096309	-	chr16:90096109-90096509		0000
C16orf42	uc002cll.3	chr16:1401873	-	chr16:1401805-1401966		0000
C16orf48	uc002etw.1	chr16:67700628	-	chr16:67700428-67700828		0000			G1/S			TTGCCCG_0.979_+_-28						G1/S		CGGCCG_0.125_+_-102_CTTGTA_1.000_-_-92
C16orf5	uc002cww.3	chr16:4588816	-	chr16:4588616-4589016		0000
C16orf53	uc002dug.4	chr16:29827527	+	chr16:29827327-29827727	8.48	0010
C16orf54	uc002dtp.2	chr16:29757340	-	chr16:29757140-29757540		0000													TTGGAA_0.998_+_-95 TTTGGA_0.998_+_-96
C16orf57	uc010via.2	chr16:58035276	+	chr16:58035076-58035387		0000						TTCCGGC_0.985_+_37
C16orf58	uc002eci.2	chr16:31519706	-	chr16:31519694-31519906		0000
C16orf62	uc002dgm.2	chr16:19566736	+	chr16:19566536-19566784		0000
C16orf7	uc002fom.1	chr16:89787394	-	chr16:89787269-89787594		0000
C16orf70	uc002erd.3	chr16:67143914	+	chr16:67143714-67144078		0000
C16orf73	uc010uvq.1	chr16:1922179	-	chr16:1921979-1922379		0000							TAACGG_0.985_+_25
C16orf79	uc002cpi.2	chr16:2261069	-	chr16:2260869-2261269		0000
C16orf80	uc021tje.1	chr16:58163296	-	chr16:58163096-58163496	8.43333	1011								AAATA_0.926_+_-167					ATTGAA_0.967_+_10
C16orf88	uc002dgq.3	chr16:19729492	-	chr16:19729292-19729628		0000						TTCCGGG_0.986_+_-44 TTCCGGG_0.995_-_-94
C16orf89	uc010bud.3	chr16:5116146	-	chr16:5115946-5116346		0000					TTTGAA_0.253_-_-166
C16orf91	uc010uvd.2	chr16:1479345	-	chr16:1479345-1479545		0000
C16orf92	uc002dvr.2	chr16:30034654	+	chr16:30034454-30034661		0000
C17orf101	uc002keu.2	chr17:80376513	-	chr17:80376361-80376713		0000
C17orf109	uc002jow.2	chr17:73629513	+	chr17:73629313-73629713		0000				TTTGAG_1.000_-_-144	TTTGAG_1.000_-_-144								TTTGAG_1.000_-_-144
C17orf110	uc002joy.3	chr17:73642645	+	chr17:73642445-73642845		0000					TTTGAG_0.257_+_97
C17orf28	uc002jmk.2	chr17:72968900	-	chr17:72968751-72969100		0000
C17orf48	uc002gmt.3	chr17:10600926	+	chr17:10600824-10601126		0000
C17orf49	uc010vti.2	chr17:6917463	+	chr17:6917263-6917463		0000
C17orf56	uc002jzu.2	chr17:79212891	-	chr17:79212833-79213091		0000
C17orf57	uc002ilm.3	chr17:45401326	+	chr17:45401126-45401526		0000
C17orf61	uc010cmg.2	chr17:7307450	-	chr17:7307403-7307650	8.45	0011				TTTGTA_0.996_-_-99	TTTGTA_0.996_-_-99 TAGGAA_0.352_-_-158			AAATA_0.946_-_-34					TTTGCA_0.998_+_-32 TTTGTA_0.996_-_-99
C17orf62;C17orf62	uc002kfa.3	chr17:80408707	-	chr17:80408507-80408907		0000
C17orf66	uc010wcl.1	chr17:34195895	-	chr17:34195746-34196095		0000								AAATA_0.998_-_-30
C17orf67	uc010dci.3	chr17:54893371	-	chr17:54893243-54893571		0000
C17orf70	uc002kap.3	chr17:79519429	-	chr17:79519356-79519629		0000
C17orf74	uc002ggw.3	chr17:7328934	+	chr17:7328734-7329007		0000
C17orf75	uc002hhg.3	chr17:30669228	-	chr17:30669158-30669428		0000
C17orf76-AS1	uc002gqc.3	chr17:16342300	+	chr17:16342100-16342455	10.9	1000
C17orf77	uc002jla.1	chr17:72581056	+	chr17:72580856-72581256		0000					TTTGAA_0.417_-_-196
C17orf78	uc010cva.1	chr17:35732984	+	chr17:35732784-35733034		0000								AAATA_0.975_+_-91
C17orf79	uc002hgp.3	chr17:30186326	-	chr17:30186218-30186526	7.97	0011
C17orf80	uc002jjk.1	chr17:71228775	+	chr17:71228575-71228975		0000
C17orf81	uc010cmb.3	chr17:7155550	+	chr17:7155350-7155750		0000					TTTGAG_0.137_-_-47
C17orf85	uc010ckl.1	chr17:3749540	-	chr17:3749517-3749740		0000
C17orf89	uc002jzx.2	chr17:79213110	+	chr17:79212910-79213163		0000
C17orf90	uc002kba.3	chr17:79633618	-	chr17:79633607-79633796		0000
C17orf99	uc002jus.4	chr17:76142433	+	chr17:76142233-76142488		0000
C18orf1	uc002ksb.2	chr18:13218785	+	chr18:13218585-13218985	6.22	0100								AAACA_1.000_+_68						CCCCGC_0.980_+_-92_GTTGAC_0.998_+_-82	CCCCGC_0.980_+_-92_GTTGAC_0.998_+_-82
C18orf26	uc002lfq.1	chr18:52258389	+	chr18:52258189-52258435		0000
C18orf32	uc002ldl.3	chr18:47013644	-	chr18:47013444-47013844		0000
C18orf54	uc002lfo.4	chr18:51886896	+	chr18:51886696-51886942		0000					TTTGAA_0.621_+_35
C18orf62	uc002lma.1	chr18:73139589	-	chr18:73139518-73139789		0000
C19orf10	uc002may.3	chr19:4670415	-	chr19:4670346-4670615		0000
C19orf12	uc002nsj.3	chr19:30205963	-	chr19:30205836-30206047		0000
C19orf18	uc002qqv.3	chr19:58485902	-	chr19:58485800-58486102		0000
C19orf24	uc002lrw.4	chr19:1275519	+	chr19:1275319-1275548		0000						TTCCGCC_0.969_+_18
C19orf25	uc010xgo.2	chr19:1479228	-	chr19:1479028-1479428		0000			G2/M									G2/M
C19orf26	uc002lrm.2	chr19:1237990	-	chr19:1237790-1238190		0000						TTGGCGG_0.971_-_57 TTCCGGC_1.000_-_-57							TATGAA_1.000_-_122
C19orf29	uc002lyh.3	chr19:3626813	-	chr19:3626760-3627013		0000
C19orf33	uc002ohu.1	chr19:38794803	+	chr19:38794603-38794901		0000
C19orf38	uc010dxm.1	chr19:10959105	+	chr19:10958905-10959184		0000
C19orf40	uc002nud.4	chr19:33463147	+	chr19:33462947-33463347	19.03	1111					TTTGAA_0.788_-_-145
C19orf42	uc002ner.3	chr19:16770968	-	chr19:16770921-16771168		0000			G2									G2
C19orf46	uc002ocq.1	chr19:36499672	-	chr19:36499583-36499872		0000				TTTGAT_0.957_-_-87	TTTGAT_0.957_-_-87								TTTGAT_0.957_-_-87
C19orf57	uc002mxl.1	chr19:14016909	-	chr19:14016709-14017109		0000						TTCCCGC_0.923_-_11 TTCCGCC_0.982_+_-181
C19orf59	uc002mhh.1	chr19:7741942	+	chr19:7741742-7741967		0000
C19orf6	uc002lqs.1	chr19:1021141	-	chr19:1020995-1021341		0000
C19orf60	uc002nju.2	chr19:18699494	+	chr19:18699294-18699611		0000
C19orf63	uc002psk.3	chr19:50979735	+	chr19:50979645-50979801		0000			S-phase									S
C19orf68	uc002pic.3	chr19:48673948	+	chr19:48673748-48674148	7.48	0010						TTCCCGC_0.969_-_38 TTCCCGC_1.000_-_-82
C19orf70	uc002mci.1	chr19:5680911	-	chr19:5680711-5681111		0000						TTGCCCG_0.921_-_-163
C19orf75	uc002pwb.1	chr19:51760963	+	chr19:51760763-51761163		0000
C19orf76	uc002pph.2	chr19:50191941	+	chr19:50191741-50192141		0000					CTTGAA_0.703_-_167			AAACA_0.905_-_145
C19orf77	uc010xhk.1	chr19:3480540	-	chr19:3480461-3480740		0000
C19orf79	uc010dvi.2	chr19:7694670	+	chr19:7694470-7694719	7.26	0011						TTCCGCC_0.995_-_16
C19orf80	uc021upg.1	chr19:11350294	+	chr19:11350094-11350313		0000
C1D	uc021viu.1	chr2:68290159	-	chr2:68289959-68290359		0000
C1GALT1	uc010ktm.1	chr7:7222245	+	chr7:7222045-7222445		0000			G1/S			TTGGCCG_0.958_+_30					G1/S	G1/S
C1GALT1C1	uc004esy.3	chrX:119764005	-	chrX:119763805-119764205		0000
C1orf101	uc010pym.2	chr1:244624672	+	chr1:244624472-244624673		0000
C1orf115	uc001hmp.1	chr1:220863627	+	chr1:220863427-220863744		0000														GCGGGC_0.001_+_55_TTTGGT_0.940_-_65
C1orf116	uc001hfd.2	chr1:207206101	-	chr1:207205901-207206301		0000				TTTGAG_1.000_-_64 TTTGAA_0.964_+_125	TTTGAG_1.000_-_64 TTTGAA_0.964_+_125								TTTGAG_1.000_-_64 TTTGAA_0.964_+_125 TTTCAA_0.918_-_126
C1orf123	uc001cvd.3	chr1:53686289	-	chr1:53686247-53686489		0000						TTCCGGC_0.972_-_-11
C1orf124	uc001hus.3	chr1:231473681	+	chr1:231473491-231473881	9.49	0010
C1orf129	uc001ghg.3	chr1:170904611	+	chr1:170904411-170904811		0000					TTTGAA_0.825_+_-38
C1orf130	uc001bjk.2	chr1:24882566	+	chr1:24882366-24882766		0000
C1orf159	uc001acu.2	chr1:1051736	-	chr1:1051536-1051936		0000
C1orf162	uc001ebe.3	chr1:112016603	+	chr1:112016403-112016803		0000			G2/M	TTTGAG_0.935_-_-134	TTTGAA_0.494_+_-38 CTTGAA_0.182_+_42 TTTGAG_0.935_-_-134							G2/M	TTTGAG_0.935_-_-134
C1orf182	uc001foo.3	chr1:156307104	+	chr1:156306904-156307304		0000
C1orf185	uc001csh.3	chr1:51567905	+	chr1:51567705-51567905		0000				TTTGAG_0.932_-_-29	TTTGAG_0.932_-_-29								TTAGAA_0.960_+_-14 TTTGAG_0.932_-_-29
C1orf186	uc001hdt.1	chr1:206288647	-	chr1:206288447-206288847		0000					TTTGAG_0.105_-_91
C1orf187	uc001asr.1	chr1:11751780	+	chr1:11751580-11751980		0000
C1orf190	uc010oma.2	chr1:46669005	+	chr1:46668805-46669098		0000					TTCGAG_0.595_-_-90									GCGCGG_0.999_+_-65_TCTGAG_0.910_+_-55 TGCGCG_0.990_+_-66_TCAGAA_0.954_-_-56	GCGCGG_0.999_+_-65_TCTGAG_0.910_+_-55 TGCGCG_0.990_+_-66_TCAGAA_0.954_-_-56
C1orf210	uc001cit.4	chr1:43751250	-	chr1:43751050-43751450		0000				CTTGAA_0.979_+_19	CTTGAA_0.979_+_19	TTCCGGC_0.936_-_-14							CTTGAA_0.979_+_19	CCGCGG_0.697_+_0_TGTGCA_0.993_-_10
C1orf212	uc001byb.3	chr1:35325417	-	chr1:35325217-35325617	6.43	0010
C1orf228	uc001cmf.2	chr1:45140393	+	chr1:45140193-45140593		0000
C1orf27	uc021pgl.1	chr1:186348898	+	chr1:186348698-186348917		0000
C1orf31	uc001hwc.3	chr1:234509428	+	chr1:234509228-234509464		0000			G1/S									G1/S
C1orf38	uc010ofo.2	chr1:28199054	+	chr1:28198854-28199082		0000
C1orf43	uc001feg.2	chr1:154193273	-	chr1:154193073-154193473		0000						TTCCCCC_0.978_+_-67
C1orf49	uc021pfe.1	chr1:178482211	+	chr1:178482011-178482323		0000
C1orf54	uc001eud.3	chr1:150245182	+	chr1:150244982-150245220		0000														GCGGGG_1.000_+_-31_TTTGGT_1.000_+_-21	GCGGGG_1.000_+_-31_TTTGGT_1.000_+_-21
C1orf56	uc001ewn.3	chr1:151020258	+	chr1:151020058-151020323		0000				TTTGAA_0.978_-_-34	TTTGAA_0.978_-_-34								TTTGAA_0.978_-_-34	CGGGCC_0.009_+_-44_TTCAAA_0.978_+_-34 GCGGGC_0.009_+_-45_GTTCAA_0.947_+_-35
C1orf61	uc001fou.1	chr1:156399340	-	chr1:156399140-156399540		0000													TTAGAA_0.952_+_-177
C1orf68	uc010pdu.2	chr1:152691997	+	chr1:152691797-152691997		0000													TCTGAA_0.944_-_-25
C1orf85	uc001foh.3	chr1:156265449	-	chr1:156265436-156265649	7.025	0011					CTTGAA_0.209_+_-60 TTTAAA_0.176_+_-91
C1orf87	uc001czs.2	chr1:60539442	-	chr1:60539242-60539642		0000								AAACA_0.996_+_-112
C1orf88	uc009wge.1	chr1:111889194	+	chr1:111888994-111889274		0000
C1orf9	uc001giq.4	chr1:172502259	+	chr1:172502059-172502459		0000							CAACGG_1.000_-_-19
C1orf94	uc001bxt.3	chr1:34642552	+	chr1:34642352-34642752		0000				TTTGAA_0.988_+_-26	TTTGAA_0.988_+_-26	TTCCCCC_0.971_+_-6	CAACGG_0.999_-_-34						TTTCAA_0.993_-_-25 TTTGAA_0.988_+_-26
C1orf95	uc021pjw.1	chr1:226736500	+	chr1:226736300-226736605		0000						TTCCCCG_0.995_-_-145
C1orf96	uc001htl.4	chr1:229478688	-	chr1:229478488-229478888		0000			G2/M						G2/M
C1QA	uc001bfy.3	chr1:22963117	+	chr1:22962917-22963317		0000				CTTGAA_0.997_+_-101	TAGGAA_0.749_+_-33 CTTGAA_0.997_+_-101								TGTGAA_1.000_+_-23 TTTCAA_0.983_-_-100 CTTGAA_0.997_+_-101
C1QB	uc001bgd.3	chr1:22979681	+	chr1:22979481-22979881		0000
C1QBP	uc002gby.1	chr17:5342471	-	chr17:5342393-5342671		0000
C1QC	uc001bgc.4	chr1:22970117	+	chr1:22969917-22970317		0000
C1QL1	uc002ihv.3	chr17:43045644	-	chr17:43045444-43045844		0000						TTGCCCC_1.000_+_138 TTCGGCC_1.000_-_188
C1QL2	uc002tlo.2	chr2:119916471	-	chr2:119916271-119916671		0000						TTCGCCG_0.993_+_48
C1QL3	uc001ioj.1	chr10:16564004	-	chr10:16563804-16564204		0000													TCTGAA_0.925_-_-78	CCGGCG_1.000_+_106_TTTGTC_1.000_+_116	CCGGCG_1.000_+_106_TTTGTC_1.000_+_116
C1QL4	uc001rtz.1	chr12:49730971	-	chr12:49730771-49731171		0000														CGCGCG_0.998_+_-14_TATGAG_0.999_-_-4	CGCGCG_0.998_+_-14_TATGAG_0.999_-_-4
C1QTNF1	uc002jwq.3	chr17:77020250	+	chr17:77020050-77020450		0000				TTCGAG_0.996_+_62	TTCGAG_0.996_+_62			AAACA_0.997_-_-45
C1QTNF2	uc003lyd.3	chr5:159797648	-	chr5:159797644-159797848		0000			G1/S									G1/S
C1QTNF3	uc003jio.3	chr5:34043371	-	chr5:34043230-34043571		0000							CAACTG_0.981_+_-109	AAATA_1.000_-_4					TATGAA_0.999_+_-121
C1QTNF4	uc001ngc.2	chr11:47615961	-	chr11:47615761-47616161		0000
C1QTNF5	uc010rzg.1	chr11:119217383	-	chr11:119217223-119217583		0000
C1QTNF6	uc003aqx.1	chr22:37584516	-	chr22:37584316-37584716		0000
C1QTNF7	uc003gnp.3	chr4:15429628	+	chr4:15429428-15429828		0000				TTTGAG_1.000_+_-20	TTTGAG_1.000_+_-20			AAATA_1.000_-_-32 AAATA_0.998_-_-47 AAACA_0.971_+_-141					TTTGGA_1.000_+_-12 TTTGAG_1.000_+_-20 TTGGAA_1.000_+_-29 TTTGGA_1.000_+_-30 TTAGAA_1.000_+_67
C1QTNF8	uc010uuw.1	chr16:1146244	-	chr16:1146044-1146444		0000
C1QTNF9	uc001upj.3	chr13:24883715	+	chr13:24883515-24883915		0000					CTTGAA_0.662_+_-130			AAATA_0.982_-_-77					TTGGAA_1.000_-_-120
C1QTNF9B	uc010tcw.2	chr13:24471145	-	chr13:24471125-24471345		0000
C1QTNF9B-AS1	uc009zzx.3	chr13:24463591	+	chr13:24463459-24463791		0000
C1R	uc010sga.1	chr12:7245043	-	chr12:7244984-7245243		0000					TTTGAA_0.806_-_-149	TTCCCGG_0.997_-_-72							TTTGCA_0.971_-_-102
C1RL	uc001qsn.3	chr12:7261869	-	chr12:7261776-7262069		0000
C1S	uc009zfr.3	chr12:7167979	+	chr12:7167779-7168179		0000				TTTGAA_0.990_-_-67	TTTGAA_0.990_-_-67			AAACA_0.975_+_-187					TCTGAA_0.989_-_17 TTTGAA_0.990_-_-67 TTTCAA_0.984_+_-68
C20orf11	uc002ydy.3	chr20:61569440	+	chr20:61569240-61569640	6.18	0010						TTGGCGC_1.000_-_-185							TTTGAC_0.993_+_-195
C20orf123	uc010zxu.1	chr20:45179213	-	chr20:45179199-45179413		0000
C20orf132	uc002xgm.2	chr20:35807974	-	chr20:35807883-35808174	8.05	0010
C20orf141	uc002wgw.3	chr20:2795656	+	chr20:2795456-2795830		0000
C20orf20	uc002ydi.3	chr20:61427804	+	chr20:61427604-61427875		0000
C20orf203	uc021wbx.1	chr20:31239783	-	chr20:31239583-31239983		0000
C20orf29	uc021wab.1	chr20:3801170	+	chr20:3800970-3801370		0000
C20orf3	uc002wty.3	chr20:24973425	-	chr20:24973324-24973625		0000
C20orf30	uc010gbi.3	chr20:5093733	-	chr20:5093674-5093933	6.13	0010
C20orf43	uc002xxt.2	chr20:55043646	+	chr20:55043446-55043753		0000						TTCCGGC_1.000_-_24
C20orf54	uc002wed.4	chr20:749228	-	chr20:749028-749428		0000
C20orf7	uc002won.3	chr20:13765671	+	chr20:13765471-13765714		0000
C20orf72	uc002wqh.3	chr20:17949761	+	chr20:17949561-17949961	15.3825	1111		1
C20orf79	uc002wrk.3	chr20:18794369	+	chr20:18794169-18794459		0000				TTTGAT_0.997_+_2	TTTGAT_0.997_+_2								TTTGAT_0.997_+_2
C20orf94	uc010zre.2	chr20:10415950	+	chr20:10415750-10416150	8.5	1011								AAACA_0.993_+_111
C21orf2	uc002zep.2	chr21:45759285	-	chr21:45759085-45759485		0000
C21orf33	uc002zec.4	chr21:45553493	+	chr21:45553293-45553579		0000
C21orf56	uc002zii.3	chr21:47604373	-	chr21:47604173-47604573	9.56	0010
C21orf59	uc011adr.2	chr21:33984918	-	chr21:33984718-33985118		0000
C21orf62	uc010glz.3	chr21:34186053	-	chr21:34185853-34186253		0000
C21orf63	uc002ypr.1	chr21:33784751	+	chr21:33784551-33784951		0000						TTCGGGG_0.996_+_188							TTTGGA_0.999_-_-106	GCGGCG_0.990_+_-117_TTGGAG_0.999_-_-107	GCGGCG_0.990_+_-117_TTGGAG_0.999_-_-107
C21orf67	uc002zgj.4	chr21:46359828	-	chr21:46359628-46359972		0000
C21orf7	uc002ynf.3	chr21:30452872	+	chr21:30452672-30453072		0000
C22orf23	uc003auj.2	chr22:38349654	-	chr22:38349454-38349794		0000
C22orf24	uc003aly.3	chr22:32341336	-	chr22:32341136-32341536		0000
C22orf28	uc003amm.2	chr22:32808274	-	chr22:32808143-32808474		0000					TTTGAG_0.521_+_-21
C22orf32	uc003bca.3	chr22:42475694	+	chr22:42475494-42475772		0000
C22orf46	uc003bax.1	chr22:42086546	+	chr22:42086346-42086631		0000
C2CD2	uc002yzw.3	chr21:43373999	-	chr21:43373799-43374199		0000
C2CD2L	uc001pvn.3	chr11:118978092	+	chr11:118977892-118978292		0000
C2CD3	uc001ouv.2	chr11:73882064	-	chr11:73881864-73882264		0000				TTTGTA_0.975_-_-192	TTTGTA_0.975_-_-192	TTGGCGC_0.924_+_40 TTGCCGG_1.000_+_127							TTTGTA_0.975_-_-192
C2CD4A	uc002ahf.4	chr15:62359175	+	chr15:62358975-62359375		0000					TTTGAA_0.573_+_28
C2CD4B	uc002ahg.2	chr15:62457482	-	chr15:62457282-62457682		0000
C2orf18	uc002rhp.1	chr2:26987141	+	chr2:26986941-26987217		0000						TTCCGGG_1.000_-_-2
C2orf28	uc002rjf.3	chr2:27434898	+	chr2:27434698-27435071		0000								AAACA_1.000_-_-17
C2orf29	uc002taw.4	chr2:101869344	+	chr2:101869144-101869426		0000
C2orf40	uc010fjf.3	chr2:106682112	+	chr2:106681912-106682220		0000
C2orf47	uc002uvm.3	chr2:200820039	+	chr2:200819839-200820115	6.715	0101
C2orf49	uc010fjd.1	chr2:105954012	+	chr2:105953812-105954044		0000
C2orf51	uc002stb.2	chr2:88824168	+	chr2:88823968-88824368		0000
C2orf56	uc002rqa.4	chr2:37458773	+	chr2:37458710-37458848		0000
C2orf63	uc002ryi.2	chr2:55459449	-	chr2:55459249-55459649	6.04	0010					TTTAAA_0.155_+_-109
C2orf65	uc002smy.3	chr2:74875164	-	chr2:74874964-74875364		0000					TTTGAG_0.146_+_139
C2orf66	uc002utv.3	chr2:197675000	-	chr2:197674800-197675200		0000					TTTAAA_0.778_+_-166 TTTGAA_0.128_-_-73
C2orf69	uc010zhb.2	chr2:200775978	+	chr2:200775778-200776161	10.3167	1011			G2/M	TTCGAA_0.985_+_-107	TTCGAA_0.985_+_-107	TTCCCGG_0.978_+_-100				G2/M		G2	TTCGAA_0.985_+_-107 TTCGAA_0.985_-_-107
C2orf71	uc002rmt.2	chr2:29297127	-	chr2:29297127-29297327		0000
C2orf74	uc010ypm.1	chr2:61389628	+	chr2:61389428-61389628		0000					TTTGAA_0.422_-_-51		TAACTG_0.996_-_-197	AAACA_1.000_-_-86
C2orf81	uc010yrq.1	chr2:74644844	-	chr2:74644644-74645044		0000													TTTTAA_0.928_-_15
C2orf82	uc002vtr.1	chr2:233734993	+	chr2:233734793-233735051		0000				TTTGAT_1.000_+_-27	TTTGAT_1.000_+_-27								TTTGAT_1.000_+_-27 TTTGCA_1.000_+_-56
C2orf83	uc010zlu.2	chr2:228498036	-	chr2:228497836-228498236		0000					TTTAAA_0.358_+_-27
C2orf89	uc010ysl.2	chr2:85108252	-	chr2:85108163-85108452		0000
C3	uc002mfm.3	chr19:6720662	-	chr19:6720600-6720862		0000					TAGGAA_0.525_+_-122
C3AR1	uc001qtv.1	chr12:8218955	-	chr12:8218755-8219155		0000
C3orf15	uc003ede.4	chr3:119421868	+	chr3:119421668-119421945	6.06	0100
C3orf17	uc011bib.2	chr3:112738555	-	chr3:112738494-112738755		0000			G2/M									G2/M
C3orf18	uc003dat.3	chr3:50608458	-	chr3:50608258-50608535		0000
C3orf20	uc003byx.2	chr3:14716605	+	chr3:14716405-14716805		0000					TTTGAA_0.486_+_-192		TAACTG_0.993_-_44						TTAGAA_0.995_+_9
C3orf23	uc003cne.4	chr3:44379943	+	chr3:44379743-44380143		0000
C3orf25	uc003emg.3	chr3:129147494	-	chr3:129147331-129147694		0000			M/G1							M/G1
C3orf26	uc003dtl.3	chr3:99536677	+	chr3:99536477-99536823	12.2925	1111
C3orf33	uc003fam.1	chr3:155524055	-	chr3:155524041-155524255		0000						TTCCCGG_0.991_-_5
C3orf35	uc003chb.3	chr3:37440967	+	chr3:37440767-37441167		0000
C3orf38	uc003dqw.3	chr3:88198892	+	chr3:88198692-88199092	10.86	1011						TTCCGGG_0.935_-_114
C3orf39	uc003cmr.1	chr3:43147565	-	chr3:43147365-43147765		0000
C3orf43	uc003fws.3	chr3:196242237	-	chr3:196242080-196242437		0000				TTTGAA_0.997_+_-40	TTTGAA_0.997_+_-40 TTTGAA_0.547_-_-96			AAATA_1.000_-_-30					TTTTAA_1.000_-_-11 TTTGGA_0.999_+_-28 TTTCAA_0.998_-_-39 TTTGAA_0.997_+_-40
C3orf45	uc003cyz.3	chr3:50316517	+	chr3:50316317-50316544		0000								AAATA_0.996_-_-58 AAATA_1.000_+_-88
C3orf52	uc011bht.1	chr3:111805181	+	chr3:111804981-111805254		0000			G2									G2
C3orf58	uc003evo.3	chr3:143690639	+	chr3:143690439-143690839		0000			G1/S			TTCCCCC_0.941_+_-112						G1/S
C3orf64	uc003dnk.3	chr3:69062774	-	chr3:69062574-69062974		0000						TTGGCGC_0.999_+_-88
C3orf71	uc010hkk.1	chr3:48956818	-	chr3:48956618-48957018		0000
C3orf75	uc003crk.3	chr3:47555199	-	chr3:47555080-47555399		0000
C3orf78	uc003dep.2	chr3:52570620	+	chr3:52570420-52570771	7.17	1011
C3orf80	uc021xgp.1	chr3:159943422	+	chr3:159943222-159943422		0000						TTGGGCG_0.992_-_-165
C4BPA	uc001hfo.3	chr1:207277606	+	chr1:207277406-207277806		0000
C4BPB	uc001hfj.3	chr1:207262211	+	chr1:207262011-207262411		0000
C4orf21	uc003iaw.3	chr4:113558151	-	chr4:113557951-113558351	13.99	1111			G1/S	TTCGAA_0.995_+_114	TTCGAA_0.995_+_114 TTTGAT_0.499_+_-5					G1/S			TTCGAA_0.995_+_114 TTCGAA_0.995_-_114
C4orf26	uc011cbo.2	chr4:76481257	+	chr4:76481057-76481292		0000				TTTAAA_0.983_+_-10	TTTAAA_0.983_+_-10			AAATA_0.991_-_-118					TTTAAA_0.983_+_-10 TTTAAA_0.983_-_-10 TTTGCA_0.998_-_-54
C4orf27	uc003isl.4	chr4:170679093	-	chr4:170679028-170679293		0000				TTTGAA_0.993_+_-12	TTTGAA_0.993_+_-12	TTCCGGG_0.996_-_-6							TTTGAA_0.993_+_-12
C4orf29	uc021xrt.1	chr4:128886460	+	chr4:128886288-128886660		0000
C4orf3	uc021xrf.1	chr4:120225600	-	chr4:120225600-120225800	7.71	0010					TTTGAA_0.258_+_-9
C4orf32	uc003iah.2	chr4:113066552	+	chr4:113066352-113066736		0000						TTGGGCG_1.000_+_-5
C4orf34	uc003guo.3	chr4:39640481	-	chr4:39640281-39640681	6.96	0010			S-phase	TTTGAT_1.000_-_-35	TTTGAT_1.000_-_-35	TTGCGCC_1.000_+_-101		AAACA_1.000_+_-31		S-phase			TTTGAT_1.000_-_-35
C4orf40	uc003hfb.4	chr4:71019903	+	chr4:71019703-71020092		0000
C4orf48	uc021xkn.1	chr4:2043719	+	chr4:2043519-2043721		0000
C4orf49	uc003ihr.1	chr4:140201492	-	chr4:140201312-140201692		0000
C4orf52	uc003grw.4	chr4:25915813	+	chr4:25915613-25915935		0000						TTCCGGG_1.000_-_6
C4orf6	uc003gii.3	chr4:5526882	+	chr4:5526682-5527057		0000					TTTGAA_0.157_-_19 TTTGAG_0.803_-_74			AAATA_0.925_-_-26
C5	uc010mvn.1	chr9:123812554	-	chr9:123812524-123812754		0000				TTTAAA_0.949_+_-29	TTTGAG_0.132_-_-12 TTTAAA_0.949_+_-29			AAATA_0.939_-_-31					TTTTAA_0.956_-_-28 TTTAAA_0.949_+_-29 TTTAAA_0.949_-_-29
C5AR1	uc002pgj.1	chr19:47813103	+	chr19:47812903-47813152		0000					TTTAAA_0.242_+_-15
C5orf15	uc003kyo.3	chr5:133304406	-	chr5:133304275-133304606		0000
C5orf20	uc003lav.3	chr5:134783038	-	chr5:134782838-134783238		0000
C5orf28	uc003jnx.3	chr5:43483992	-	chr5:43483792-43484192		0000
C5orf38	uc011cmg.2	chr5:2752261	+	chr5:2752061-2752378		0000
C5orf39	uc003jnf.3	chr5:43040447	-	chr5:43040247-43040647		0000
C5orf4	uc003lvs.4	chr5:154230213	-	chr5:154230013-154230413	5.85	0010
C5orf41	uc003mcf.3	chr5:172483354	+	chr5:172483154-172483554		0000			G2/M			TTCCGGG_1.000_+_13 TTCCCGG_0.997_+_-154		AAACA_1.000_+_39 AAACA_1.000_+_44	G2/M
C5orf42	uc011cpa.1	chr5:37249530	-	chr5:37249330-37249730		0000			G1/S							G1/S		S
C5orf43	uc010iwm.1	chr5:60458302	-	chr5:60458102-60458502	5.6	0100						TTCCGCC_1.000_+_2 TTCCGGC_0.939_-_-77
C5orf45	uc003mlc.3	chr5:179285840	-	chr5:179285796-179286040		0000
C5orf46	uc003lou.3	chr5:147286101	-	chr5:147286064-147286301		0000
C5orf55	uc010ita.3	chr5:443258	-	chr5:443058-443458		0000			S-phase			TTCCGGC_0.948_+_-10						S
C5orf60	uc003mki.3	chr5:179072047	-	chr5:179072021-179072247		0000
C5orf62	uc003lsw.3	chr5:150157507	+	chr5:150157307-150157707		0000
C5orf63	uc021ydc.1	chr5:126409184	-	chr5:126408984-126409384		0000						TTCCGCC_0.993_-_-55
C5orf64	uc003jst.1	chr5:60933635	+	chr5:60933435-60933835	5.65	0100				TTTGAG_0.920_-_-158	TTTAAA_0.220_+_87 TTTGAG_0.920_-_-158		TAACTG_1.000_-_-142	AAATA_1.000_-_-114 AAACA_0.997_+_127					TTTGCA_0.996_-_-30 TTTTAA_0.959_+_-57 TTTGAG_0.920_-_-158
C6	uc003jmk.2	chr5:41213667	-	chr5:41213467-41213867		0000			G2/M		CTTGAA_0.536_-_-15				G2/M
C6orf1	uc003ojf.3	chr6:34216904	-	chr6:34216704-34217104		0000			G1/S	TTTGAT_1.000_+_69	TTTGAT_1.000_+_69	TTCCGGG_0.997_+_92						G1/S	TTTGAT_1.000_+_69
C6orf103	uc003qlp.3	chr6:146920135	+	chr6:146919935-146920176		0000
C6orf105	uc011dip.2	chr6:11779280	-	chr6:11779080-11779480		0000
C6orf106	uc003ojr.2	chr6:34664625	-	chr6:34664425-34664825		0000					TTTGAG_0.850_-_125
C6orf108	uc003ouo.3	chr6:43197211	-	chr6:43197194-43197411		0000
C6orf120	uc003qxb.3	chr6:170102256	+	chr6:170102056-170102258		0000
C6orf125	uc003ofa.1	chr6:33679504	-	chr6:33679463-33679704		0000						TTGGGCC_0.978_-_32
C6orf126	uc010jvz.1	chr6:35744391	+	chr6:35744191-35744395		0000
C6orf127	uc003old.4	chr6:35748830	+	chr6:35748630-35748887		0000
C6orf130	uc003opm.3	chr6:41040188	-	chr6:41039988-41040388	10.5667	1011			M/G1			TTCCGCC_0.997_+_-54 TTCCCCG_0.979_+_70 TTCCGGC_0.998_-_-117					M/G1			GGCGGC_0.876_+_-106_TTTGGC_0.915_-_-96
C6orf136	uc003nqw.4	chr6:30614815	+	chr6:30614615-30615008		0000						TTCCGGG_0.979_-_183
C6orf138	uc011dwm.2	chr6:48036425	-	chr6:48036391-48036625		0000				TTTGAA_1.000_+_-136	TTTGAA_1.000_+_-136	TTCCCCG_1.000_-_-101		AAACA_1.000_-_-138					TTTCAA_1.000_-_-135 TTTGAA_1.000_+_-136	CCCGCC_0.998_+_-163_GTTGCA_1.000_-_-153 GCCCGG_0.997_+_11_TGTGTA_1.000_-_21	CCCGCC_0.998_+_-163_GTTGCA_1.000_-_-153 GCCCGG_0.997_+_11_TGTGTA_1.000_-_21
C6orf15	uc003nsk.1	chr6:31080332	-	chr6:31080332-31080532		0000				CTTGAA_0.985_-_-167	TAGGAA_0.466_+_-136 CTTGAA_0.985_-_-167								CTTGAA_0.985_-_-167
C6orf162	uc003plp.1	chr6:88032305	+	chr6:88032105-88032505		0000
C6orf163	uc021zcl.1	chr6:88054570	+	chr6:88054370-88054770		0000				TTTGAA_1.000_+_-93	CTTGAA_0.385_+_178 TTTGAA_1.000_+_-93 TAGGAA_0.155_+_-157		CAACTG_1.000_-_-51	AAATA_0.986_-_-95					TTTGAA_1.000_+_-93
C6orf165	uc003plu.2	chr6:88117689	+	chr6:88117489-88117889		0000
C6orf170	uc003pyo.1	chr6:121655644	-	chr6:121655576-121655844	6.35	1000
C6orf174	uc003qbd.3	chr6:127840500	-	chr6:127840300-127840700		0000					TTCGAG_0.264_+_168								TTTGCA_0.930_+_143
C6orf186	uc010kdu.1	chr6:110679475	-	chr6:110679475-110679675		0000
C6orf191	uc003qbs.3	chr6:130182416	-	chr6:130182341-130182616		0000					TTTGTA_0.732_-_-160 TTTGAA_0.169_-_-177								TTTCAA_0.987_-_-11 ATTGAA_0.989_+_-12
C6orf192	uc003qdw.1	chr6:133119747	-	chr6:133119595-133119947		0000
C6orf201	uc003mwa.4	chr6:4079439	+	chr6:4079239-4079639		0000
C6orf203	uc011eaj.2	chr6:107349406	+	chr6:107349206-107349606		0000
C6orf228	uc011dio.2	chr6:11094265	+	chr6:11094065-11094465		0000
C6orf25	uc003nwn.3	chr6:31691120	+	chr6:31690920-31691160		0000
C6orf47	uc003nvm.1	chr6:31628549	-	chr6:31628349-31628749		0000						TTCCGGG_1.000_+_10
C6orf57	uc003pfq.1	chr6:71276624	+	chr6:71276424-71276643		0000
C6orf58	uc003qbh.3	chr6:127898318	+	chr6:127898118-127898330		0000
C6orf62	uc003nel.3	chr6:24719403	-	chr6:24719203-24719603		0000			M/G1				TAACTG_0.989_-_185	AAACA_0.979_-_-38 AAATA_0.954_-_-62 AAACA_1.000_-_120 AAATA_1.000_+_-120 AAATA_0.996_-_177				M/G1	TCTGAA_1.000_+_-124 TTTGCA_1.000_+_-197
C6orf70	uc003qxg.1	chr6:170151720	+	chr6:170151554-170151753		0000
C6orf72	uc003qmq.1	chr6:149887527	+	chr6:149887327-149887550		0000														GCCCGG_0.001_+_8_CTTGGA_0.952_-_18
C6orf89	uc011dtr.2	chr6:36853639	+	chr6:36853439-36853802		0000						TTCCGGG_0.996_+_66 TTCCGGG_0.908_-_80		AAACA_1.000_+_85
C7	uc003jmh.3	chr5:40909598	+	chr5:40909398-40909712		0000													TTGGAA_0.915_-_-177 TTAGAA_0.958_-_-199
C7orf10	uc003tho.2	chr7:40174574	+	chr7:40174374-40174598		0000
C7orf11	uc003thl.4	chr7:40174251	-	chr7:40174166-40174451		0000
C7orf13	uc003wmm.3	chr7:156433348	-	chr7:156433348-156433548		0000
C7orf23	uc003uio.3	chr7:86849031	-	chr7:86848831-86849231		0000			G1/S					AAACA_0.937_-_-29	G1/S			S
C7orf25	uc010kxq.3	chr7:42952151	-	chr7:42951951-42952351		0000			G1/S							G1/S
C7orf30	uc003swd.1	chr7:23338939	+	chr7:23338739-23338971		0000
C7orf34	uc003wca.2	chr7:142636602	+	chr7:142636402-142636643		0000
C7orf42	uc003tvk.3	chr7:66386202	+	chr7:66386002-66386402		0000			G2/M			TTCCGGG_0.975_-_11						G2/M
C7orf44	uc003tip.1	chr7:43769083	-	chr7:43768883-43769283	6.55	0010						TTCCGGC_0.953_-_-63
C7orf45	uc003vpp.3	chr7:129847703	+	chr7:129847503-129847750		0000
C7orf49	uc003vsh.3	chr7:134855578	-	chr7:134855378-134855778		0000
C7orf53	uc011kmq.2	chr7:112120907	+	chr7:112120707-112121107		0000
C7orf58	uc003vjq.4	chr7:120628750	+	chr7:120628550-120628950		0000								AAACA_0.996_-_132
C7orf63	uc011khj.2	chr7:89874487	+	chr7:89874287-89874687		0000
C7orf66	uc003vfo.3	chr7:108524637	-	chr7:108524589-108524837		0000
C7orf69	uc003tnz.4	chr7:47834888	+	chr7:47834688-47834933		0000					TTTGAA_0.104_+_-169
C7orf70	uc003spu.3	chr7:6388590	-	chr7:6388390-6388790		0000
C7orf72	uc011kcj.2	chr7:50135681	+	chr7:50135481-50135681		0000
C7orf73	uc003vsy.3	chr7:135347220	+	chr7:135347020-135347327		0000						TTCCGGG_0.992_-_-4
C8A	uc001cyo.2	chr1:57320442	+	chr1:57320242-57320574		0000					TTTGAA_0.255_+_-35 TTTGAA_0.153_-_-125
C8B	uc010oon.2	chr1:57431688	-	chr1:57431621-57431888		0000								AAACA_0.988_-_-48					TTTGCA_0.984_-_-81
C8G	uc004cka.2	chr9:139839697	+	chr9:139839497-139839772		0000
C8orf34	uc010lyz.3	chr8:69242956	+	chr8:69242756-69243156		0000				TTTGAA_0.999_+_-70 TTCGAG_0.906_+_116	TTTGAA_0.999_+_-70 TTCGAG_0.906_+_116 TTTGTA_0.408_+_-117								TTTCAA_0.999_-_-69 TTTGAA_0.999_+_-70
C8orf38	uc003yhj.3	chr8:96037213	+	chr8:96037013-96037236		0000			G1/S						G1/S			G1/S
C8orf4	uc003xnq.2	chr8:40010986	+	chr8:40010786-40011051		0000			S-phase	TTTAAA_1.000_+_-15 TTTGAG_0.956_+_-41	TTTAAA_1.000_+_-15 TTTGAG_0.956_+_-41		CAACTG_0.997_+_-102	AAATA_1.000_+_-12		S-phase		S	TTTAAA_1.000_+_-15 TTTAAA_1.000_-_-15 TGTGAA_0.996_-_-22 TTTGAG_0.956_+_-41
C8orf40	uc011lcv.2	chr8:42396297	+	chr8:42396097-42396497		0000
C8orf42	uc003wpd.3	chr8:495331	-	chr8:495131-495531		0000
C8orf45	uc003xwz.4	chr8:67782983	+	chr8:67782783-67783183		0000
C8orf48	uc003wwp.3	chr8:13424351	+	chr8:13424151-13424500		0000			S-phase			TTCCGGG_0.920_-_22						S
C8orf49	uc003wud.1	chr8:11618764	+	chr8:11618564-11618922		0000
C8orf55	uc003yww.1	chr8:143808620	+	chr8:143808420-143808764	9.05	0011			G1/S							G1/S
C8orf73	uc010mfg.1	chr8:144654928	-	chr8:144654884-144655128		0000														CCGGGG_0.220_+_-34_CTAGAA_0.995_-_-24
C8orf76	uc003yqc.2	chr8:124253638	-	chr8:124253586-124253838		0000			G2									G2
C8orf80	uc003xgm.4	chr8:27941388	-	chr8:27941188-27941588		0000								AAACA_0.994_-_102
C8orf83	uc003yfk.4	chr8:93978372	-	chr8:93978172-93978572		0000
C8orf84	uc003xzf.3	chr8:74005507	-	chr8:74005307-74005707		0000
C8orf85	uc003yof.3	chr8:117950463	+	chr8:117950263-117950482		0000
C8ORFK29	uc011llb.2	chr8:145578574	-	chr8:145578427-145578774		0000
C9	uc003jlv.4	chr5:39364655	-	chr5:39364566-39364855		0000					TTTGTA_0.105_-_-81
C9orf100	uc003zxm.1	chr9:35665278	-	chr9:35665166-35665478	9.09667	1011	1		G2	TTTGAA_0.990_+_60	TTTGAA_0.990_+_60				G2	G2/M		G2/M	TTTGAA_0.990_+_60
C9orf102	uc010mry.1	chr9:98637899	+	chr9:98637699-98638099		0000
[truncated: 15,607 more rows]

## Sheet: Muller 2014, DREAM bound genes
Genes	Transcript ID	TSS	Strand	Promoter-Region	avgMAT	DREAM	MMB	FOXM1	Cell-Cycle-Peak	CHR_0.9	CHR_0.1	E2F_0.9	MBS_0.9	FBS_0.9	WF	SV	BJ	GT	CHR-like-d1_0.9	CHR-like-d2_0.9
ADAT2	uc003qjj.3	chr6:143771841	-	chr6:143771795-143772041	7.9	1011						TTGCCGC_0.975_-_-177
ADSS	uc001iaj.3	chr1:244615436	-	chr1:244615236-244615636	8.6	1111				TTTGTA_0.952_+_-136	TTCGAG_0.192_-_-43 TTTGAA_0.106_+_-94 TTTGTA_0.952_+_-136								TTTGTA_0.952_+_-136
AEN	uc002bmt.2	chr15:89164526	+	chr15:89164326-89164726	15.13	1011			M/G1							M/G1
AFMID	uc002jvb.3	chr17:76183397	+	chr17:76183197-76183451	16.1975	1111
AGFG2	uc003uvf.3	chr7:100136833	+	chr7:100136633-100136969	10.06	1011						TTCCCGC_1.000_-_76							GTTGAA_0.998_+_93
AHCTF1	uc001ibv.2	chr1:247094726	-	chr1:247094629-247094926	11.1667	1011
AIFM1	uc004evi.3	chrX:129299861	-	chrX:129299661-129300061	6.91667	1011								AAACA_0.988_-_164					TTTGAC_0.999_+_166
AIM1	uc003prh.3	chr6:106959304	+	chr6:106959104-106959504	9.11	1011								AAATA_0.915_-_-9
AKIRIN2	uc003pmk.3	chr6:88411985	-	chr6:88411785-88412185	13.06	1111			G2	TTTGAA_1.000_+_-20 TTTAAA_1.000_+_-198	TTTGAA_1.000_+_-20 TTTAAA_1.000_+_-198	TTGGGGC_1.000_+_12 TTCCGGG_1.000_-_-186				M/G1		G2	TTTGAA_1.000_+_-20 TTGGAA_1.000_-_-192 TTTAAA_1.000_+_-198 TTTAAA_1.000_-_-198	GCCGCC_1.000_+_-29_ATTCAA_1.000_-_-19 GGCCGC_1.000_+_-30_TTCAAA_1.000_-_-20
AKR1B1	uc003vrp.1	chr7:134143888	-	chr7:134143814-134144088	8.3775	1111					TTTAAA_0.424_+_7
ALDH16A1	uc010yas.2	chr19:49956472	+	chr19:49956272-49956588	11.3567	1011
ALDH6A1	uc001xpo.3	chr14:74551196	-	chr14:74551097-74551396	7	1011
ALG10	uc001rlm.3	chr12:34175215	+	chr12:34175015-34175415	13.4767	1011			G1/S									G1/S
ALG10B	uc001rln.4	chr12:38710556	+	chr12:38710356-38710695	10.29	1011					TTCGAG_0.848_+_57
ALG8	uc001oyz.1	chr11:77850699	-	chr11:77850634-77850899	13.6175	1111				TTTAAA_0.986_+_-82	TTTAAA_0.986_+_-82								TTTAAA_0.986_+_-82 TTTAAA_0.986_-_-82
ALKBH6	uc002ocw.1	chr19:36505141	-	chr19:36505135-36505341	8.8575	1111
ANKRD32	uc003kkr.4	chr5:93954390	+	chr5:93954190-93954590	10.67	1011					TAGGAA_0.856_+_96	TTCCCGC_1.000_-_-30 TTCCGGG_0.982_+_-52 TTCCGGG_0.993_-_-72		AAACA_0.999_-_-21
ANKRD49	uc001pex.3	chr11:94227152	+	chr11:94226952-94227352	14.4875	1111			G2			TTCCGGG_0.988_-_8						G2
ANLN	uc003tfg.3	chr7:36429431	+	chr7:36429231-36429575	11.355	1111	1		G2/M	TTTGAA_1.000_-_14 TTTGAA_1.000_+_20	TTTGAA_1.000_-_14 TTTGAA_1.000_+_20				G2/M	G2/M		G2	TTTGAA_1.000_-_14 TTTGAA_1.000_+_20
ANP32E	uc001etv.4	chr1:150208504	-	chr1:150208304-150208704	15.3825	1111	1	1	G2/M	TTTGAT_1.000_-_-144 TTTGAA_1.000_-_-184	TTTGAT_1.000_-_-144 TTTGAA_1.000_-_-184	TTGGCGG_1.000_+_17	TAACTG_1.000_+_-136		G2/M		G2/M	G2/M	ATTGAA_1.000_+_58 TTTGAT_1.000_-_-144 TTTGAA_1.000_-_-184
AP4B1	uc010owq.2	chr1:114447525	-	chr1:114447339-114447725	11.68	1011			G1/S						G1/S
AP4M1	uc003utd.3	chr7:99699129	+	chr7:99698929-99699329	13.905	1111						TTCCCGC_0.999_+_72 TTGGCGC_1.000_+_-110
APITD1-CORT	uc021ogd.1	chr1:10490158	+	chr1:10489958-10490358	11.5167	1011
APLF	uc010fdf.2	chr2:68694690	+	chr2:68694490-68694863	19.675	1111						TTCCGCC_0.986_-_118		AAACA_0.993_+_123
APOBEC3B	uc003awo.1	chr22:39378404	+	chr22:39378204-39378458	18.645	1111			M/G1								M/G1
APOBEC3D	uc021wpq.1	chr22:39417117	+	chr22:39416917-39417317	10.7933	1011
ARHGAP11A	uc001zgw.3	chr15:32907690	+	chr15:32907490-32907890	19.21	1111		1	G2/M	TTTGAA_1.000_+_-65	TTTGAG_0.806_+_-13 TTTGAA_1.000_+_-65	TTCGCGC_0.943_+_-25				G2/M	G2/M	G2	TTTCAA_1.000_-_-64 TTTGAA_1.000_+_-65
ARHGAP11B	uc001zet.1	chr15:30918878	+	chr15:30918678-30919023	21.23	1111		1	G2		TTTGAA_0.304_-_54 TTTGAG_0.478_+_60	TTCCGGC_0.914_-_32			G2	G2/M			TTGGAA_0.933_+_78
ARID3B	uc002aye.3	chr15:74833547	+	chr15:74833347-74833747	19.7225	1111			G2			TTCCGGC_0.937_+_-86						G2
ARL13B	uc003drf.3	chr3:93698982	+	chr3:93698782-93699182	8.63667	1011
ARL6IP1	uc002dfl.1	chr16:18812857	-	chr16:18812788-18813057	8.895	1111		1	G2/M	CTTGAA_1.000_-_-152	CTTGAA_1.000_-_-152				G2/M	M/G1		G2/M	CTTGAA_1.000_-_-152 TTTCAA_1.000_+_-153 TTTGAC_1.000_+_-164
ASF1B	uc002mye.3	chr19:14247440	-	chr19:14247268-14247640	15.1833	1011			S-phase	TTTGAA_1.000_+_11	TTTGAA_1.000_+_11			AAATA_1.000_-_9	S-phase		G2/M		TTTGAA_1.000_+_11
ASH2L	uc003xkt.4	chr8:37963010	+	chr8:37962810-37963068	12.17	1011					TTTGAA_0.296_+_-18
ASNA1	uc002muv.3	chr19:12848305	+	chr19:12848105-12848319	7.88667	1011													TTGGAA_0.997_-_8 TTTGGA_0.999_-_9
ASPM	uc001gtw.4	chr1:197115824	-	chr1:197115624-197116024	23.86	1111	1	1	G2/M	TTTAAA_0.999_+_17 TTTGAA_0.930_-_-89	TTTAAA_0.999_+_17 TTTGAA_0.930_-_-89	TTGCCGC_0.965_-_9				G2/M	M/G1	G2/M	TTTAAA_0.999_+_17 TTTAAA_0.999_-_17 TTTGAA_0.930_-_-89	GGCGGC_0.972_+_8_GTTTAA_0.995_-_18
ATAD2	uc003yqj.3	chr8:124408705	-	chr8:124408597-124408905	23.3825	1111		1	S-phase			TTCCGCG_1.000_-_28			S-phase		G1/S	G1/S		GGCGCC_1.000_+_11_TCCGAA_1.000_-_21 GGCGCC_1.000_+_11_TTCGGA_1.000_+_21
ATAD5	uc002hfs.1	chr17:29159022	+	chr17:29158822-29159222	18.515	1111	1		G1/S		TTCGAT_0.298_+_156	TTCGCGC_1.000_-_-26						G1/S
ATF4	uc003axz.3	chr22:39916568	+	chr22:39916368-39916768	7.44667	1011						TTGCCGC_0.982_-_159							TTTGCA_1.000_+_126
ATM	uc001pkb.1	chr11:108093558	+	chr11:108093358-108093758	12.655	1111						TTCGGCG_1.000_-_-122
ATR	uc003eux.4	chr3:142297668	-	chr3:142297546-142297868	8.69667	1011						TTCCGGG_1.000_+_-1
AURKA	uc002xxe.1	chr20:54967351	-	chr20:54967151-54967551	18.5975	1111	1	1	G2/M	TTTAAA_1.000_+_60 TTTGAA_0.959_+_76	TTTAAA_1.000_+_60 TTTGAA_0.959_+_76		TAACGG_0.997_+_85 CAACGG_0.968_-_-104	AAATA_0.998_-_58	G2/M	G2/M		G2/M	TTTAAA_1.000_+_60 TTTAAA_1.000_-_60 TTTTAA_1.000_-_61 TTTGAA_0.959_+_76 TTAGAA_0.943_-_82
AURKB	uc002gkm.3	chr17:8113883	-	chr17:8113683-8114083	19.055	1111	1	1	G2	TTTGAA_0.999_+_-50	TTTGAA_0.999_+_-50				G2	G2/M	G2/M		TTTCAA_0.989_-_-49 TTTGAA_0.999_+_-50
BARD1	uc021vwf.1	chr2:215674428	-	chr2:215674293-215674628	18.2575	1111			G1/S						G1/S		G1/S	G1/S
BIRC5	uc010dhl.1	chr17:76210276	+	chr17:76210076-76210326	17.6925	1111			G2/M		TTTGAG_0.110_-_-193				G2/M	M/G1	G2/M	M/G1
BLM	uc002bpr.3	chr15:91260578	+	chr15:91260378-91260778	26.2875	1111			S-phase			TTCCCGC_0.994_-_46			S-phase		G1/S		TTTGGA_0.945_+_54
BLOC1S3	uc002pax.4	chr19:45682002	+	chr19:45681802-45682202	7.98333	1011
BORA	uc010aen.1	chr13:73302041	+	chr13:73301841-73302188	14.875	1111	1	1	G2/M	TTCGAA_0.998_+_-104 TTTGAA_0.998_+_-157	TTTGAA_0.998_+_-157 TTCGAA_0.998_+_-104	TTCCGCG_0.996_-_3 TTCGCGG_1.000_+_-67 TTCCGCG_0.975_-_-131				G2/M		G2	TTCGAA_0.998_+_-104 TTCGAA_0.998_-_-104 TTTGGA_1.000_+_-151 TTTGAA_0.998_+_-157
BRCA1	uc010wht.1	chr17:41277500	-	chr17:41277300-41277700	21.195	1111			S-phase			TTCCCGC_1.000_-_71			S-phase		G1/S	G1/S	TTTTAA_0.994_-_89	GCGCGG_1.000_+_69_TCTGTA_0.986_-_79
BRCA2	uc001uua.1	chr13:32889616	+	chr13:32889416-32889816	11.27	1111			G1/S			TTCCGGG_0.991_+_-58						G1/S
BRD8	uc011cyn.1	chr5:137514358	-	chr5:137514303-137514558	34.095	1111		1	G2			TTGGCCC_0.980_-_46			G2	M/G1	M/G1	G2
BRD9	uc003jbo.3	chr5:892939	-	chr5:892772-893113	10.8967	1011
BRIP1	uc002izk.2	chr17:59940920	-	chr17:59940720-59941120	13.4	1011		1	G1/S			TTCCCGC_1.000_-_32					G1/S	G1/S
BRIX1	uc003jja.3	chr5:34915819	+	chr5:34915619-34915843	11.7	1111
BUB1	uc010fkb.3	chr2:111435684	-	chr2:111435572-111435884	13.61	1111			G2/M	TTCGAA_0.994_+_44	TTCGAA_0.994_+_44		CAACGG_0.962_+_-50		G2/M	M/G1	G2/M	G2/M	TTCGAA_0.994_+_44 TTCGAA_0.994_-_44
BUB1B	uc001zkx.4	chr15:40453209	+	chr15:40453009-40453409	20.03	1111	1		G2/M	TTTGAA_1.000_+_38	TTTGAA_1.000_+_38	TTGGCGG_0.987_+_46	TAACGG_1.000_-_30		G2/M	M/G1	G2/M	G2/M	TTTGAA_1.000_+_38 TTTCAA_0.983_-_39	CGCGGG_0.996_+_23_ATTTAA_1.000_-_33 GCGCGG_0.989_+_22_GTTAAA_1.000_+_32 GCGCGG_0.989_+_22_TTTAAC_1.000_-_32
BUB3	uc001lhf.4	chr10:124913759	+	chr10:124913559-124913959	7.47333	1011	1		G2	TTTGAG_1.000_+_12 TTTGAA_1.000_+_95	TTTGAG_1.000_+_12 TTTGAA_1.000_+_95	TTCCGGC_1.000_-_17			G2		G2	G2/M	TTTGAG_1.000_+_12 TTTGAA_1.000_+_95 TTTCAA_0.999_-_96
C10orf88	uc001lgx.2	chr10:124713919	-	chr10:124713719-124714119	11.43	1111
C11orf10	uc001nsf.3	chr11:61560085	-	chr11:61560030-61560285	15.1625	1111
C11orf30	uc009yuj.1	chr11:76156068	+	chr11:76155868-76156268	8	1011	1		S-phase			TTGCCCC_1.000_+_10 TTGGCGG_1.000_+_62 TTCCCGC_1.000_-_-62 TTCGGGG_0.999_-_87 TTGGGGC_0.958_+_191		AAACA_1.000_+_31				S	TCTGAA_1.000_-_17
C11orf82	uc001ozt.3	chr11:82612736	+	chr11:82612536-82612936	17.8025	1111			S-phase	TTCGAT_0.991_+_39	TTCGAT_0.991_+_39	TTCCGGC_0.982_+_14			S-phase			G2
C12orf32	uc001qlh.3	chr12:2986364	+	chr12:2986164-2986564	14.2167	1011			G2	TTTGAA_1.000_+_-49	TTTGAA_1.000_+_-49	TTGGCGC_1.000_+_-42		AAACA_1.000_-_-51	G2				TTTCAA_1.000_-_-48 TTTGAA_1.000_+_-49
C15orf42	uc021sug.1	chr15:90118817	+	chr15:90118617-90118817	20.9475	1111			G2			TTGGGGG_0.998_-_-150				G2		G2
C16orf80	uc021tje.1	chr16:58163296	-	chr16:58163096-58163496	8.43333	1011								AAATA_0.926_+_-167					ATTGAA_0.967_+_10
C19orf40	uc002nud.4	chr19:33463147	+	chr19:33462947-33463347	19.03	1111					TTTGAA_0.788_-_-145
C20orf72	uc002wqh.3	chr20:17949761	+	chr20:17949561-17949961	15.3825	1111		1
C20orf94	uc010zre.2	chr20:10415950	+	chr20:10415750-10416150	8.5	1011								AAACA_0.993_+_111
C2orf69	uc010zhb.2	chr2:200775978	+	chr2:200775778-200776161	10.3167	1011			G2/M	TTCGAA_0.985_+_-107	TTCGAA_0.985_+_-107	TTCCCGG_0.978_+_-100				G2/M		G2	TTCGAA_0.985_+_-107 TTCGAA_0.985_-_-107
C3orf26	uc003dtl.3	chr3:99536677	+	chr3:99536477-99536823	12.2925	1111
C3orf38	uc003dqw.3	chr3:88198892	+	chr3:88198692-88199092	10.86	1011						TTCCGGG_0.935_-_114
C3orf78	uc003dep.2	chr3:52570620	+	chr3:52570420-52570771	7.17	1011
C4orf21	uc003iaw.3	chr4:113558151	-	chr4:113557951-113558351	13.99	1111			G1/S	TTCGAA_0.995_+_114	TTCGAA_0.995_+_114 TTTGAT_0.499_+_-5					G1/S			TTCGAA_0.995_+_114 TTCGAA_0.995_-_114
C6orf130	uc003opm.3	chr6:41040188	-	chr6:41039988-41040388	10.5667	1011			M/G1			TTCCGCC_0.997_+_-54 TTCCCCG_0.979_+_70 TTCCGGC_0.998_-_-117					M/G1
C9orf100	uc003zxm.1	chr9:35665278	-	chr9:35665166-35665478	9.09667	1011	1		G2	TTTGAA_0.990_+_60	TTTGAA_0.990_+_60				G2	G2/M		G2/M	TTTGAA_0.990_+_60
C9orf46	uc003zjc.3	chr9:5437937	-	chr9:5437737-5438137	10.4	1011					TTTGAA_0.807_+_-117
CACYBP	uc001gkj.1	chr1:174968891	+	chr1:174968691-174969091	8.4	1011						TTCCGGG_0.927_+_-56
CADM2	uc003dqj.3	chr3:85008132	+	chr3:85007932-85008332	7.71333	1011						TTCCCGG_1.000_+_-144 TTCGGGC_1.000_-_-176		AAACA_1.000_-_-149
CALR	uc002mvu.2	chr19:13049413	+	chr19:13049213-13049493	10.7167	1011					TTTGAG_0.655_+_-37 TTTAAA_0.831_+_43	TTGCCGC_0.996_+_60
CASC5	uc010ucq.1	chr15:40886446	+	chr15:40886246-40886646	25.995	1111			G2	TTTGAA_0.995_+_4	TTTGAA_0.995_+_4					M/G1		G2	TTTGAA_0.995_+_4
CBWD1	uc011llr.1	chr9:179075	-	chr9:178969-179275	9.1025	1111
CBWD2	uc010yxw.2	chr2:114195267	+	chr2:114195067-114195445	8.00333	1011
CBWD3	uc004aga.4	chr9:70490177	-	chr9:70490068-70490377	9.7825	1111
CBWD3	uc011lrp.2	chr9:70856838	+	chr9:70856638-70856947	9.26333	1011
CBX3	uc003sxu.3	chr7:26241323	+	chr7:26241123-26241523	12.25	1011			M/G1						M/G1
CCDC15	uc001qbm.4	chr11:124824016	+	chr11:124823816-124824216	10.78	1011			G2/M								G2/M
CCDC76	uc001dsv.3	chr1:100598705	+	chr1:100598505-100598724	17.17	1111			G2					AAACA_0.997_-_-68				G2
CCDC77	uc010sdq.2	chr12:510740	+	chr12:510540-510940	11.45	1111							CAACTG_0.964_-_76	AAACA_1.000_-_69					TTTGAC_0.994_+_60
CCDC99	uc003mae.4	chr5:169010637	+	chr5:169010437-169010837	11.915	1111			G2/M	TTTGAA_0.984_-_120	TTTGAA_0.984_-_120			AAATA_0.952_+_123	G2/M			G2	TTTGAA_0.984_-_120
CCHCR1	uc003nsq.4	chr6:31125566	-	chr6:31125377-31125766	13.8	1011
CCNA2	uc003iec.4	chr4:122745088	-	chr4:122744888-122745288	12.5175	1111	1	1	G2/M	CTTGAA_1.000_+_21	CTTGAA_1.000_+_21 CTTGAA_0.151_+_-38				G2/M	G2/M	G2/M	G2/M	TTTCAA_1.000_+_2 ATTGAA_1.000_-_3 CTTGAA_1.000_+_21	CGCGGG_1.000_+_12_GTTCAA_1.000_-_22
CCNB1	uc010ixb.3	chr5:68462836	+	chr5:68462636-68463036	13.1925	1111	1	1	G2/M	TTTAAA_0.986_+_111	TTTAAA_0.986_+_111				G2/M	M/G1	M/G1	G2/M	TTTAAA_0.986_+_111 TTTAAA_0.986_-_111
CCNB2	uc002afz.3	chr15:59397283	+	chr15:59397083-59397467	17.19	1111	1	1	G2/M	TTTGAA_1.000_+_33	TTTGAA_1.000_+_33 TTTGAT_0.793_-_-83			AAATA_0.999_-_31	G2/M	M/G1	G2/M	G2/M	TTTGAA_1.000_+_33
CCNG2	uc003hkq.4	chr4:78078356	+	chr4:78078156-78078556	16.4825	1111		1			TTTAAA_0.218_+_-69	TTGGGGG_0.997_+_-10		AAACA_1.000_+_15
CD3EAP	uc002pbq.1	chr19:45909466	+	chr19:45909266-45909666	9.65667	1011						TTCCCGC_0.988_+_-99
CDC20	uc001cix.3	chr1:43824625	+	chr1:43824425-43824825	18.285	1111	1	1	G2/M	TTTGAA_1.000_+_-38	TTTGAA_1.000_+_-38					M/G1	G2/M	G2/M	TTTGAA_1.000_+_-38
CDC23	uc003lcm.1	chr5:137549032	-	chr5:137549001-137549232	14.8375	1111						TTCCCGC_1.000_+_-167
CDC25A	uc003csh.1	chr3:48229801	-	chr3:48229601-48230001	12.3225	1111			G1/S	TAGGAA_0.996_+_-139	TAGGAA_0.996_+_-139	TTCGCGG_1.000_-_-92 TTGCCGG_0.990_+_96 TTGGCGC_1.000_+_-150		AAACA_0.994_-_75	G1/S		G1/S	G1/S	TTTGGA_1.000_+_77	TGGCGC_1.000_+_-149_TAGGAA_0.996_+_-139
CDC25B	uc002wjn.3	chr20:3776400	+	chr20:3776200-3776600	10.66	1011		1	G2/M						G2/M	M/G1	G2/M	G2/M
CDC25C	uc003lcp.1	chr5:137667516	-	chr5:137667316-137667716	20.1225	1111	1		G2	TTTGAA_0.990_+_-8	TTTGAA_0.990_+_-8				G2	G2/M	G2/M	G2/M	TTTGAA_0.990_+_-8
CDC45	uc002zpr.3	chr22:19467413	+	chr22:19467213-19467491	20.295	1111			G1/S			TTGGCGG_0.978_+_6						G1/S
CDC6	uc002huj.1	chr17:38444145	+	chr17:38443945-38444345	19.5725	1111			G1/S			TTGGCGC_0.996_+_-6 TTGGCGG_0.990_+_-41 TTGGGGC_0.948_+_-153			G1/S	S-phase	G1/S	G1/S		TGGCGG_0.995_+_-40_TGGGAA_0.945_+_-30
CDC7	uc010osw.2	chr1:91966403	+	chr1:91966203-91966603	12.9867	1011			S-phase		TAGGAA_0.829_+_148				S-phase		G1/S
CDCA2	uc011lae.1	chr8:25316512	+	chr8:25316312-25316712	15.6625	1111	1	1	G2	TTCGAA_1.000_+_-87	TTCGAA_1.000_+_-87 TAGGAA_0.619_+_-167				G2	G2/M		G2	TTTGCA_0.965_+_-80 TTCGAA_1.000_+_-87 TTCGAA_1.000_-_-87
CDCA3	uc001qre.2	chr12:6960456	-	chr12:6960256-6960656	27.79	1111	1		G2/M	TTTGAA_1.000_+_2	TTTGAA_1.000_+_2	TTCCCGC_0.994_-_-6			G2/M	G2/M	G2/M	G2/M	TTTGAA_1.000_+_2 TTTCAA_0.999_-_3	GGCGGG_1.000_+_-7_TTGAAA_0.999_+_3 TGGCGG_1.000_+_-8_TTCAAA_1.000_-_2
CDCA5	uc001ocp.2	chr11:64851615	-	chr11:64851450-64851815	19.425	1111			S-phase		TTCGAA_0.867_+_76	TTCCGGG_1.000_+_-80			S-phase
CDCA7	uc010zek.1	chr2:174219560	+	chr2:174219360-174219691	16.1375	1111			G1/S			TTCCCGC_0.974_-_-25			G1/S	M/G1
CDCA8	uc001cbr.3	chr1:38158158	+	chr1:38157958-38158358	18.3475	1111	1	1	G2	TTTGAA_1.000_+_7	TTTGAA_1.000_+_7				G2	G2/M	G2/M		TTTGAA_1.000_+_7
CDK1	uc021prh.1	chr10:62538211	+	chr10:62538011-62538411	15.5425	1111	1	1	G2/M	TTTGAA_1.000_+_12 TTTGAA_1.000_+_-44	TTTGAA_1.000_+_12 TTTGAA_1.000_+_-44	TTCGCGC_0.999_+_-102				G2/M		G2	TTTGAA_1.000_+_12 TTTCAA_1.000_-_13 TTTCAA_1.000_-_-43 TTTGAA_1.000_+_-44	GCGCGG_0.999_+_2_TTCAAA_1.000_-_12
CDK2	uc001siu.4	chr12:56360555	+	chr12:56360355-56360755	8.925	1111			G2/M	CTTGAA_1.000_-_64	CTTGAA_1.000_-_64	TTCCCGC_1.000_-_1 TTGCCGC_1.000_-_51		AAACA_1.000_-_61			G2/M		TTTCAA_1.000_+_63 CTTGAA_1.000_-_64
CDKN2D	uc002mpa.3	chr19:10679631	-	chr19:10679431-10679831	12.485	1111		1	G2/M	TTTGTA_0.991_+_-123	TTTGTA_0.991_+_-123	TTGGGGG_0.998_-_29		AAACA_0.973_+_-114	G2/M		G2/M	G2	TTTGTA_0.991_+_-123
CDKN3	uc001xar.3	chr14:54863672	+	chr14:54863472-54863786	10.405	1111	1	1	M/G1	TTTGAA_0.998_-_-117	TAGGAA_0.409_+_-104 TTTGAA_0.998_-_-117				M/G1	G2/M		M/G1	TTTGAA_0.998_-_-117 TTTCAA_1.000_+_-118	CCCGCG_0.996_+_-128_TTGAAA_1.000_-_-118 CCGCGC_0.998_+_-127_TTCAAA_0.998_+_-117
CDS2	uc002wlr.2	chr20:5107406	+	chr20:5107206-5107606	9.17	1011
CENPA	uc002rhs.3	chr2:27008881	+	chr2:27008681-27009064	10.97	1011	1	1	G2/M	TTTAAA_0.983_+_-14	TTTAAA_0.983_+_-14				G2/M	G2/M	G2/M	G2	TTTTAA_0.985_-_-13 TTTAAA_0.983_+_-14 TTTAAA_0.983_-_-14
CENPE	uc003hxc.1	chr4:104119566	-	chr4:104119476-104119766	18.7225	1111			G2/M	TTTAAA_0.977_+_-3	TTTAAA_0.977_+_-3 TTTAAA_0.292_+_3				G2/M	G2/M	G2/M	G2	TTTAAA_0.977_+_-3 TTTAAA_0.977_-_-3 TTTTAA_0.993_+_-4
CENPF	uc001hkm.3	chr1:214776531	+	chr1:214776331-214776731	31.845	1111	1	1	G2/M	TTTAAA_0.991_+_-108	TTTGAA_0.809_+_47 TTTAAA_0.991_+_-108			AAACA_0.984_-_-112	G2/M		M/G1	G2/M	TTTTAA_0.981_-_-107 TTTAAA_0.991_+_-108 TTTAAA_0.991_-_-108 TTTTAA_0.993_+_-109
CENPH	uc010ixc.3	chr5:68485374	+	chr5:68485174-68485461	19.05	1111						TTCCCGC_0.923_-_22
CENPK	uc003jts.3	chr5:64858995	-	chr5:64858795-64859137	21.445	1111
CENPL	uc001gje.4	chr1:173793270	-	chr1:173793070-173793470	17.5275	1111	1		G2		TTTGAA_0.333_+_148				G2	G2/M
CENPM	uc003bbn.3	chr22:42343148	-	chr22:42343080-42343348	18.775	1111			S-phase	TTTGAA_0.945_+_16	TTTGAA_0.945_+_16				S-phase				TTTGAA_0.945_+_16
CENPN	uc002ffx.2	chr16:81040102	+	chr16:81039902-81040302	15.4367	1011
CENPO	uc002rfq.2	chr2:25016330	+	chr2:25016246-25016342	19.2125	1111	1		G2/M	TTTGAA_0.957_+_0 TTTGTA_1.000_+_-46	TTTGAA_0.957_+_0 TTTGTA_1.000_+_-46							G2/M	TTTGAA_0.957_+_0 TTTGTA_1.000_+_-46
CENPP	uc004arz.3	chr9:95087740	+	chr9:95087540-95087940	19.09	1111					TAGGAA_0.333_-_-74
CENPQ	uc003ozh.1	chr6:49431095	+	chr6:49430895-49431295	13.7125	1111			S-phase						S-phase	G1/S		G1/S
CEP152	uc001zwy.3	chr15:49103343	-	chr15:49103143-49103543	22.045	1111				TTTGAA_0.999_-_-103	TAGGAA_0.852_+_81 TTTGAA_0.999_-_-103	TTCCCGC_0.991_+_-127		AAACA_1.000_+_-100					TTTGAA_0.999_-_-103 TTTCAA_0.999_+_-104	GGCGCC_1.000_+_-113_TTCAAA_0.999_+_-103 TGGCGC_1.000_+_-114_TTGAAA_0.999_-_-104
CEP44	uc010iro.2	chr4:175205054	+	chr4:175204854-175205254	11.97	1111					TTTGTA_0.888_-_73
CEP55	uc009xug.3	chr10:95256368	+	chr10:95256168-95256568	13.0725	1111		1	G2/M	TTTGAA_1.000_-_-2	TTTGAA_1.000_-_-2	TTCCGGG_1.000_-_6			G2/M			G2/M	TTTGAA_1.000_-_-2
CEP57	uc009ywn.2	chr11:95523624	+	chr11:95523424-95523824	17.9075	1111			G1/S		TTTGAT_0.866_+_-2		TAACGG_0.993_-_20					G1/S
CEP76	uc010xab.1	chr18:12702703	-	chr18:12702547-12702903	12.84	1111					TTTGAA_0.514_+_-56
CEP78	uc010mpp.3	chr9:80850990	+	chr9:80850790-80851190	8.60667	1011
CEP89	uc002nua.3	chr19:33462869	-	chr19:33462780-33463069	19.03	1111					TTTGAA_0.788_+_-139
CHCHD2	uc003tsa.3	chr7:56174187	-	chr7:56174106-56174387	14.6167	1011
CHCHD3	uc022alw.1	chr7:132766828	-	chr7:132766697-132767028	7.19	1011						TTCCGCG_0.927_-_-175
CHEK1	uc001qcg.4	chr11:125496250	+	chr11:125496050-125496450	15.02	1111			G1/S									G1/S
CHEK2	uc003adx.1	chr22:29137822	-	chr22:29137622-29138022	14.195	1111	1	1	G2	TTTGTA_0.997_+_-10 TTTGAT_0.951_+_-31	TTTGTA_0.997_+_-10 TTTGAT_0.951_+_-31 TTCGAA_0.887_+_103				G2		G2/M		TTTGTA_0.997_+_-10 TTTGAT_0.951_+_-31
CHTOP	uc001fcn.2	chr1:153606457	+	chr1:153606257-153606657	9.28667	1011								AAACA_0.996_-_98						TGGCGG_0.983_+_86_TTTGTT_1.000_+_96
CIT	uc001txi.2	chr12:120315095	-	chr12:120314895-120315295	17.0675	1111	1	1	G2/M	TTTGAA_0.995_-_-20	TTTGAA_0.995_-_-20 TTTGAT_0.854_+_-161		CAACGG_0.977_-_-191		G2/M	M/G1	G2/M	G2/M	TTTGAA_0.995_-_-20
CKAP2	uc001vgt.2	chr13:53029494	+	chr13:53029294-53029691	9.3	1011	1	1	G2/M		TTTGAA_0.719_+_-45				G2/M	G2/M	G2/M	G2	ATTGAA_0.986_-_54
CKAP2L	uc002tie.2	chr2:113522254	-	chr2:113522175-113522454	19.86	1111	1	1	G2	TTTGAA_0.988_-_-19	TTTGAA_0.988_-_-19 TTTGAA_0.714_+_50 TTTGAT_0.567_-_-115				G2	G2/M		G2	TTTGAA_0.988_-_-19 TTTCAA_0.996_+_-20
CKAP5	uc001ndi.2	chr11:46867859	-	chr11:46867659-46868059	13.25	1011		1	G2/M	TTTGAA_1.000_-_44 TTTGAA_0.999_-_-46	TTTGAA_1.000_-_44 TTTGAA_0.999_-_-46	TTGGGCC_1.000_-_32			G2/M		G2/M		TTTCAA_1.000_+_43 TTTGAA_1.000_-_44 TTTGAA_0.999_-_-46 TTTCAA_0.992_+_-47	GGCCGC_0.994_+_62_TCAGAA_1.000_-_72
CKS1B	uc001fgb.3	chr1:154947117	+	chr1:154946917-154947221	21.9775	1111	1		G2/M	TTTGAA_1.000_+_10 TAGGAA_1.000_+_-10	TTTGAA_1.000_+_10 TAGGAA_1.000_+_-10 CTTGAA_0.337_+_-51			AAACA_1.000_-_8	G2/M		G2/M	M/G1	TTTGAA_1.000_+_10 TTTCAA_1.000_-_11	GGCGGC_0.999_+_1_TTGAAA_1.000_+_11 GGGCGG_0.990_+_0_TTCAAA_1.000_-_10
CKS2	uc004aqh.3	chr9:91926112	+	chr9:91925912-91926207	7.41667	1011	1		G2/M	TTTGAA_0.989_-_-31	TTTGAA_0.989_-_-31				G2/M	M/G1	G2/M	G2/M	TTTGAA_0.989_-_-31
CLP1	uc010rjw.2	chr11:57425215	+	chr11:57425015-57425415	9.55	1011						TTCCGGC_0.963_+_21
CLSPN	uc009vux.3	chr1:36235551	-	chr1:36235471-36235751	8.25667	1011			G1/S			TTCCCGC_1.000_-_-34 TTGGCGG_0.964_-_-175			G1/S	S-phase	G1/S	S
CNOT3	uc002qdj.2	chr19:54641435	+	chr19:54641235-54641635	10.1667	1011				TTCGAT_1.000_-_-154	TTCGAT_1.000_-_-154	TTCCGCG_1.000_+_66 TTCGCGC_1.000_+_162								CCGCCG_1.000_+_35_CTTGGA_1.000_+_45 CGCCGC_1.000_+_36_TTGGAC_1.000_+_46 CGCGGC_0.999_+_90_CTTGAG_0.999_+_100
CNOT4	uc003vss.3	chr7:135194875	-	chr7:135194675-135195075	13.7633	1011			G2/M			TTCCCCG_0.974_+_153						G2/M	GTTGAA_0.998_-_-97 GTTGAA_0.998_-_-139 TCTGAA_0.999_+_140
CNPY4	uc003uto.3	chr7:99717264	+	chr7:99717064-99717317	7.21	1011
COMMD4	uc002azy.3	chr15:75628373	+	chr15:75628173-75628430	7.32667	1011
COX17	uc003ecz.1	chr3:119396243	-	chr3:119396157-119396443	8.33333	1011
COX8A	uc001nye.3	chr11:63742078	+	chr11:63741878-63742152	14.6725	1111		1				TTGGCGC_0.990_-_-99
CREBZF	uc001pas.2	chr11:85376182	-	chr11:85375982-85376382	9.01333	1011			G1/S			TTCCGGC_1.000_+_11 TTCGCGC_0.970_-_-31 TTGCCGC_0.907_+_-120	CAACGG_1.000_-_22	AAATA_0.971_-_-125	G1/S
CSE1L	uc002xty.3	chr20:47662837	+	chr20:47662637-47663037	9.21667	1011			G2/M	TTTGAA_1.000_+_32	TTTGAA_1.000_+_32	TTGCCGG_1.000_+_23					G2/M		TTTGAA_1.000_+_32
CSTF1	uc002xxl.1	chr20:54967426	+	chr20:54967226-54967626	18.5975	1111	1	1	G2	TTTAAA_1.000_+_-141 TTTGAA_0.959_-_-157	TTTAAA_1.000_+_-141 TTTGAA_0.959_-_-157		CAACGG_0.968_+_23 TAACGG_0.997_-_-166	AAATA_0.998_+_-138				G2	TTTAAA_1.000_+_-141 TTTAAA_1.000_-_-141 TTTTAA_1.000_+_-142 TTTGAA_0.959_-_-157 TTAGAA_0.943_+_-163
CSTF2T	uc001jjp.3	chr10:53459355	-	chr10:53459309-53459555	14.4675	1111			G1/S									G1/S
CSTF3	uc001muj.3	chr11:33183037	-	chr11:33182871-33183237	13.0867	1011				TTTGAG_0.999_+_18	TTTGAG_0.999_+_18	TTCCGGG_1.000_-_-51		AAATA_0.998_-_16					TTTTAA_1.000_+_6 TATGAA_0.999_-_12 TTTGAG_0.999_+_18
CTDSPL2	uc001ztr.3	chr15:44719578	+	chr15:44719378-44719778	7.99	1011				TTTGTA_0.974_-_-47	TTTGTA_0.974_-_-47	TTCCGCG_0.997_-_163	TAACGG_1.000_-_-161						TTTGTA_0.974_-_-47
CUL3	uc010zls.1	chr2:225450110	-	chr2:225449910-225450310	10.57	1011						TTCGGCC_1.000_+_39 TTCGCCC_0.999_+_-181		AAACA_1.000_-_58
CWC15	uc001pfd.4	chr11:94706776	-	chr11:94706576-94706976	14.1825	1111			M/G1	TTTGAA_0.999_-_-110	TTTGAA_0.999_-_-110 CTTGAA_0.127_+_-156	TTCCGGG_0.998_+_8			M/G1				TTTGAA_0.999_-_-110 TTTCAA_0.990_+_-111
CWF19L1	uc010qpn.1	chr10:102027437	-	chr10:102027350-102027637	11.0233	1011
CYB5B	uc002exg.1	chr16:69458497	+	chr16:69458297-69458586	9.82667	1011				TTCGAG_0.938_-_-145	TAGGAA_0.563_+_-21 TTCGAG_0.938_-_-145
DARS2	uc001gjh.2	chr1:173793796	+	chr1:173793596-173793996	17.5275	1111	1						TAACTG_0.999_+_-176						TTTTAA_0.995_+_-179
DBF4	uc003ujf.1	chr7:87505543	+	chr7:87505343-87505743	7.76	1011			G2/M							G2/M		G2/M
DBF4B	uc010wjc.2	chr17:42785975	+	chr17:42785775-42786175	17.6925	1111	1		G2/M	TTTAAA_0.975_+_55	TTTAAA_0.975_+_55					G2/M		G2/M	TTTAAA_0.975_+_55 TTTAAA_0.975_-_55
DCAF16	uc003gpn.3	chr4:17812381	-	chr4:17812181-17812581	11.4	1011	1			TTTGAA_0.989_-_-192	TTTGAA_0.989_-_-192 TTCGAG_0.288_-_-200	TTCCCGC_0.989_+_-183		AAATA_0.929_+_-189					TTTGAA_0.989_-_-192
DCDC1	uc001msu.2	chr11:31391357	-	chr11:31391157-31391557	8.03	1011						TTCCGCC_0.987_+_-34
DCK	uc003hfx.3	chr4:71859264	+	chr4:71859064-71859464	7.44333	1011						TTGGCGC_0.999_-_123							TTTGAC_0.971_-_131
DCLRE1A	uc001law.2	chr10:115613859	-	chr10:115613659-115614059	9.03333	1011			S-phase			TTCGCGC_0.982_-_-133				S-phase	G1/S
DCLRE1B	uc001eeg.3	chr1:114447914	+	chr1:114447714-114448114	11.68	1011			G1/S		TTTGAG_0.899_+_36	TTCCCCC_0.953_+_-75					G1/S	G1/S
DCLRE1C	uc001inr.3	chr10:14996094	-	chr10:14996009-14996294	13.48	1111		1	G2			TTCCGGG_0.999_-_3					M/G1	G2
DCP2	uc011cwa.2	chr5:112312406	+	chr5:112312206-112312606	12.6433	1011	1		G2	CTTGAA_0.993_-_-24	CTTGAA_0.993_-_-24	TTGGGCC_0.958_+_-32 TTCCCGC_1.000_-_-153		AAACA_0.977_+_-87				G2	CTTGAA_0.993_-_-24 TTTCAA_0.995_+_-25
DCTN5	uc021tfi.1	chr16:23652686	+	chr16:23652486-23652863	8.43	1011
DDB2	uc009yli.1	chr11:47236492	+	chr11:47236292-47236687	10.4167	1011						TTGGCGG_0.998_+_57
DDX10	uc001pkm.3	chr11:108535815	+	chr11:108535615-108535880	12.0067	1011			G2		TTTGAA_0.451_-_-66					M/G1		G2
DDX11	uc001rjr.1	chr12:31226778	+	chr12:31226578-31226978	22.2475	1111			G1/S								G1/S	S
DDX21	uc001jov.1	chr10:70715891	+	chr10:70715691-70715981	10.19	1011
DEPDC1	uc001dem.4	chr1:68962799	-	chr1:68962682-68962999	22.05	1111		1	G2/M	TTTGAA_0.958_-_6	TTTGAA_0.958_-_6				G2/M	G2/M	G2/M	G2	TTTGAA_0.958_-_6
DEPDC1B	uc011cqm.2	chr5:59995993	-	chr5:59995920-59996193	16.9275	1111		1	G2/M	TTTGAA_0.999_-_1	TTTGAA_0.999_-_1				G2/M	G2/M		G2/M	TTTGAA_0.999_-_1
DEPDC4	uc009ztv.1	chr12:100660857	-	chr12:100660854-100661057	10.5867	1011			G1/S							G1/S
DERL2	uc002gcc.1	chr17:5389494	-	chr17:5389481-5389694	9.22	1011						TTCCGCC_0.997_-_-41
DHRS7B	uc002gyo.3	chr17:21030240	+	chr17:21030040-21030284	12.29	1111
DIAPH3	uc001vht.3	chr13:60738119	-	chr13:60737919-60738319	21.0925	1111													TCTGAA_0.975_-_53	TGGCGG_0.999_+_42_TTTCAG_0.988_+_52
DLGAP5	uc001xbt.3	chr14:55658396	-	chr14:55658196-55658596	19.325	1111	1	1	G2/M	TTTGAA_0.987_-_-17 TTTGAA_0.993_+_95	TTTGAA_0.987_-_-17 TTTGAA_0.993_+_95					M/G1		G2/M	TTTGAA_0.987_-_-17 ATTGAA_1.000_-_-26 TTTCAA_1.000_+_-27 TTTGAA_0.993_+_95
DMTF1	uc003uij.3	chr7:86781676	+	chr7:86781476-86781876	10.515	1111						TTCCGGC_0.915_-_-37		AAATA_1.000_-_140 AAACA_1.000_+_187					TTTGGA_1.000_+_145 TTGGAA_1.000_-_167 TTTGGA_1.000_-_168
DNA2	uc021prt.1	chr10:70231879	-	chr10:70231879-70232079	20.3475	1111
DNAJB11	uc003fqi.3	chr3:186287951	+	chr3:186287943-186288151	8.02	1011
DNAJC24	uc001msx.3	chr11:31391376	+	chr11:31391176-31391576	8.03	1011						TTCCGGC_1.000_+_4
DNMT3B	uc002wyc.3	chr20:31350190	+	chr20:31349990-31350390	11.2633	1011			G2	TTTGAA_1.000_-_-141	TTTGAA_1.000_-_-141	TTGGGCC_0.986_-_175					G2		TTTGAA_1.000_-_-141 TTTCAA_1.000_+_-142
DOLPP1	uc004bxd.3	chr9:131843382	+	chr9:131843182-131843410	11	1111					TTCGAG_0.381_-_2
DROSHA	uc003jhi.2	chr5:31532282	-	chr5:31532082-31532482	9.22667	1011													TTTTAA_0.977_+_68
DSCC1	uc003yov.3	chr8:120868170	-	chr8:120868035-120868370	10.8967	1011			G1/S		TTTGAA_0.183_-_28	TTCCGGG_0.992_-_-6				G1/S		G1/S
DSN1	uc002xfy.4	chr20:35402154	-	chr20:35401954-35402354	11.43	1011			G1/S							G1/S		G1/S
DTL	uc009xdc.3	chr1:212208918	+	chr1:212208779-212209118	15.045	1111			G1/S			TTCCGCG_0.984_+_-44 TTCCCGC_0.999_+_64 TTGGCGC_1.000_+_165 TTGGCGG_1.000_+_177			G1/S	G1/S	G1/S	G1/S		TGGCGC_1.000_+_166_TTTGGC_1.000_+_176
DZIP3	uc003dxd.3	chr3:108308336	+	chr3:108308222-108308536	14.56	1111	1	1	G2/M		TTTGAT_0.463_+_-39				G2/M			G2/M
E2F2	uc001bhe.2	chr1:23857712	-	chr1:23857512-23857912	12.2325	1111			G1/S			TTGGCGC_1.000_+_-55 TTCGCGG_1.000_+_-70 TTCCGCG_1.000_+_-89 TTCCGGG_0.997_+_-152			G1/S	G1/S		G1/S		CCGCGG_1.000_+_-87_TCCGAA_0.999_+_-77 CCGCGG_1.000_+_-87_TTCGGA_0.999_-_-77
E2F3	uc003nda.2	chr6:20402136	+	chr6:20401936-20402336	15.3933	1011				TTTGAA_1.000_+_-91	TTTGAA_1.000_+_-91	TTGGCGC_1.000_+_-50 TTCGCGG_1.000_+_-64 TTCCCGC_1.000_-_-79 TTGGGGC_0.994_+_92 TTGGCCC_1.000_+_149	CAACGG_1.000_-_55	AAATA_0.990_+_-99 AAATA_1.000_-_144 AAATA_1.000_+_178					TTTCAA_1.000_-_-90 TTTGAA_1.000_+_-91 TTTGCA_1.000_-_-102	GGGGCG_1.000_+_-114_TATGCA_1.000_+_-104
EDC3	uc002aym.3	chr15:74988386	-	chr15:74988186-74988586	15.27	1111						TTCCGGC_0.998_-_-14 TTCCCGG_0.974_+_-65
EED	uc001pbp.3	chr11:85955805	+	chr11:85955605-85956005	11.345	1111				TTCGAT_0.999_-_27 TTTGAG_0.924_+_94	TTCGAT_0.999_-_27 TTTGAG_0.924_+_94	TTGGCCC_1.000_-_38 TTGCGGC_0.999_+_45							TTTGAG_0.924_+_94
EEF1G	uc001ntm.1	chr11:62341460	-	chr11:62341314-62341660	7.89	1011						TTCCGGC_1.000_+_35 TTGCGGC_1.000_+_99		AAACA_0.988_-_20 AAACA_0.992_-_45
EFCAB11	uc001xxx.2	chr14:90421089	-	chr14:90421004-90421289	14.6825	1111
EFCAB7	uc001dbf.3	chr1:63989012	+	chr1:63988812-63989212	20.99	1111			G1/S							G1/S
EIF2AK3	uc002stc.4	chr2:88927094	-	chr2:88926894-88927294	8.15667	1011		1	G2	TTTGAT_0.999_+_-32	TTTGAT_0.999_+_-32					G2			TTTGAT_0.999_+_-32
EIF3F	uc010rbj.2	chr11:8008444	+	chr11:8008244-8008644	11.89	1011			G2/M		TTTGAG_0.103_-_16							G2/M
EME1	uc010dbp.2	chr17:48450580	+	chr17:48450531-48450780	12.665	1111			G1/S			TTCCGGG_0.982_+_12				G1/S
EMG1	uc001qsh.4	chr12:7079943	+	chr12:7079743-7080086	7.78667	1011				TTTGAA_1.000_-_54	TTTGAA_1.000_-_54	TTCCGGC_0.910_-_66							TTTCAA_0.999_+_53 TTTGAA_1.000_-_54
ENC1	uc011css.2	chr5:73937249	-	chr5:73937049-73937449	8.14667	1011		1		TTTGAA_0.991_+_-98	TTTGAA_0.991_+_-98								TTTGAA_0.991_+_-98	GCGGCG_0.930_+_-82_GCTGAA_0.981_+_-72
ENY2	uc003ync.3	chr8:110346551	+	chr8:110346351-110346697	8.64333	1011						TTCCGGG_1.000_-_-1	TAACGG_1.000_+_86							CCCGCG_1.000_+_-50_ATTTAA_0.999_-_-40 GCCCGC_1.000_+_-51_GTTAAA_0.999_+_-41 GCCCGC_1.000_+_-51_TTTAAC_0.999_-_-41
EPM2AIP1	uc003cgk.3	chr3:37034795	-	chr3:37034595-37034995	8.95667	1011	1				TAGGAA_0.238_-_28
ERI1	uc003wsk.2	chr8:8860313	+	chr8:8860113-8860513	9.31	1011						TTCCGGG_1.000_-_101 TTCCCGC_0.994_-_145
ERI2	uc010bwh.2	chr16:20817795	-	chr16:20817752-20817995	15.5575	1111				TTTGAA_0.933_+_-29	TTTGAA_0.933_+_-29								TTTGAA_0.933_+_-29
ESCO2	uc003xgg.3	chr8:27632057	+	chr8:27631857-27632257	21.4625	1111			S-phase	TTTGAA_0.967_+_5	TTTGAA_0.967_+_5				S-phase				TTTGAA_0.967_+_5
ESPL1	uc001sck.2	chr12:53662082	+	chr12:53661882-53662282	17.2075	1111	1	1	G2	TTTGAA_0.999_+_-30	TTTGAA_0.999_+_-30	TTCCGCG_1.000_-_-12		AAATA_0.947_-_-32	G2	M/G1	M/G1	G2/M	TTTCAA_1.000_-_-29 TTTGAA_0.999_+_-30
ETFDH	uc003iqb.3	chr4:159593276	+	chr4:159593076-159593476	14.9133	1011						TTCCGGG_0.996_-_102
EXO1	uc009xgq.3	chr1:242011492	+	chr1:242011292-242011692	28.8575	1111			S-phase			TTGCGCG_1.000_-_-4			S-phase		G1/S	G1/S	ATTGAA_0.999_+_3
EXOSC6	uc002eym.1	chr16:70285833	-	chr16:70285803-70286033	8.57333	1011				TTTAAA_0.998_+_-42	TTTAAA_0.998_+_-42		CAACGG_0.958_+_-36	AAACA_0.975_+_-39					TTTAAA_0.998_+_-42 TTTAAA_0.998_-_-42	CCGCGC_0.998_+_-51_GTTTAA_0.997_-_-41
EXOSC8	uc001uwa.3	chr13:37574677	+	chr13:37574477-37574877	10.455	1111
EXOSC9	uc003idz.3	chr4:122722471	+	chr4:122722271-122722579	7.91	1011			G1/S								G1/S
FAM110A	uc002wef.1	chr20:814355	+	chr20:814155-814555	14.2425	1111		1	G2	TTCGAA_1.000_+_-70	TTCGAA_1.000_+_-70	TTCGCCC_1.000_-_-35			G2	G2/M		G2	TTCGAA_1.000_+_-70 TTCGAA_1.000_-_-70
FAM111A	uc001nnp.3	chr11:58912251	+	chr11:58912051-58912451	19.0725	1111		1										G1/S|S
FAM111B	uc001nnm.3	chr11:58874657	+	chr11:58874457-58874857	8.28667	1011			G1/S						G1/S	G1/S		G1/S
FAM200B	uc003gof.4	chr4:15683351	+	chr4:15683151-15683551	12.3525	1111	1
FAM64A	uc002gcw.2	chr17:6347734	+	chr17:6347534-6347934	17.905	1111		1	G2/M	TTTGAA_0.995_-_9	TTTGAA_0.995_-_9				G2/M	G2/M	G2/M	G2/M	TTTCAA_0.999_+_8 TTTGAA_0.995_-_9	CCGCGC_0.997_+_-2_TTGAAA_0.999_-_8
FAM83D	uc002xjf.3	chr20:37554954	+	chr20:37554754-37554995	16.48	1111		1	G2						G2	G2/M		G2
FANCB	uc004cwh.1	chrX:14891184	-	chrX:14890984-14891384	9.9425	1111													TTTGGA_0.984_+_16
FANCD2	uc003bux.1	chr3:10068112	+	chr3:10067912-10068312	24.605	1111			G2			TTCCCGC_0.997_-_7 TTCCGGC_1.000_+_-59			G2
FANCG	uc003zwb.1	chr9:35080013	-	chr9:35079813-35080213	11.995	1111			G1/S						G1/S		G1/S
FANCI	uc002bnm.1	chr15:89787193	+	chr15:89786993-89787393	12.0167	1011			S-phase						S-phase
FANCM	uc001wwd.4	chr14:45605135	+	chr14:45604935-45605234	18.215	1111
FBXO5	uc003qpg.3	chr6:153304203	-	chr6:153304094-153304403	10.2725	1111	1	1	G2	TTTAAA_1.000_+_-5 TTTGAA_1.000_-_-14	TTTAAA_1.000_+_-5 TTTGAA_1.000_-_-14					G2	G1/S	G2	TTTTAA_1.000_-_-4 TTTAAA_1.000_+_-5 TTTAAA_1.000_-_-5 TTTTAA_1.000_+_-6 TTTGAA_1.000_-_-14
FBXO8	uc003itp.3	chr4:175205402	-	chr4:175205202-175205602	11.97	1111	1
FDFT1	uc003wui.3	chr8:11660189	+	chr8:11659989-11660341	6.95667	1011			G2/M		TAGGAA_0.527_-_-93							G2/M
FDXR	uc002jlx.3	chr17:72869156	-	chr17:72869069-72869356	7.97667	1011
FEN1	uc001nsg.3	chr11:61560108	+	chr11:61560030-61560308	15.1625	1111			S-phase						S-phase		G1/S
FHOD1	uc002esl.3	chr16:67281425	-	chr16:67281313-67281625	13.5133	1011						TTCCCGC_0.997_+_-164	TAACGG_1.000_+_-140
FIGN	uc002uck.1	chr2:164592513	-	chr2:164592313-164592713	7.59333	1011				TTTGAA_1.000_+_2 TTTGAA_1.000_-_43 TTTGAA_1.000_-_62 TTTGAA_1.000_+_-76 TTTGAA_1.000_+_-113	TTTGAA_1.000_+_-76 TTTGAA_1.000_+_-113 TTTGAA_1.000_+_2 TTTGAA_1.000_-_43 TTTGAA_1.000_-_62			AAACA_1.000_-_-7 AAACA_1.000_+_109					TTTGAA_1.000_+_2 TTTCAA_1.000_-_3 TTGGAA_1.000_-_9 TTGGAA_1.000_-_-18 TTTGAA_1.000_-_43 TTGGAA_1.000_+_52 TTTCAA_1.000_+_61 TTTGAA_1.000_-_62 TTTGAA_1.000_+_-76 TGTGAA_1.000_+_-87 TTTCAA_1.000_-_-112 TTTGAA_1.000_+_-113
FKBP10	uc002hxv.2	chr17:39968961	+	chr17:39968761-39969161	8.49333	1011
FLAD1	uc001fgc.3	chr1:154955769	+	chr1:154955569-154955969	15.3167	1011			G1/S						G1/S
FOXM1	uc009zea.3	chr12:2986321	-	chr12:2986121-2986521	14.2167	1011			G2/M	TTTGAA_1.000_-_0	TTTGAA_1.000_-_0	TTGGCGC_1.000_-_-8		AAACA_1.000_+_3	G2/M		G2/M		TTTGAA_1.000_-_0 TTTCAA_1.000_+_-1	CCGGCG_1.000_+_-11_TTGAAA_1.000_-_-1 CGGCGC_1.000_+_-10_TTCAAA_1.000_+_0 TCCCCC_0.979_+_81_TGGGAA_0.940_-_91
FOXN2	uc002rwh.1	chr2:48541794	+	chr2:48541594-48541994	11.26	1011						TTGGCGC_0.999_+_-59 TTCCCGG_1.000_+_61
FOXRED1	uc001qdi.3	chr11:126138934	+	chr11:126138734-126139101	10.55	1111						TTCCGGG_1.000_-_-134 TTGGCGC_0.999_-_-166								CGCGGG_1.000_+_-158_TGTGAC_1.000_-_-148
FTSJ2	uc003slm.3	chr7:2281833	-	chr7:2281804-2282033	11.47	1111
GAPDH	uc001qop.1	chr12:6643656	+	chr12:6643456-6643856	8.10667	1011
GBA	uc001fjl.3	chr1:155214653	-	chr1:155214453-155214853	9.60333	1011		1
GEN1	uc002rct.2	chr2:17935176	+	chr2:17934976-17935376	15.5575	1111
GGCT	uc003tba.3	chr7:30544457	-	chr7:30544325-30544657	7.7	1011					TTTGAT_0.528_-_-79
GGH	uc003xuw.3	chr8:63951610	-	chr8:63951410-63951810	12.2133	1011
GIN1	uc003kob.1	chr5:102455842	-	chr5:102455642-102456042	9.99	1011	1				TTTGAA_0.779_+_53	TTCCGGC_1.000_+_7 TTCCGGC_0.938_+_-88
GINS1	uc002wuv.1	chr20:25388322	+	chr20:25388122-25388456	12.4325	1111						TTGGCGC_0.991_-_-8
GINS3	uc010cdj.3	chr16:58426297	+	chr16:58426097-58426497	12.04	1111			G1/S			TTCCCGC_0.962_-_73			G1/S
GINS4	uc003xnx.3	chr8:41386724	+	chr8:41386524-41386924	10.7567	1011
GLA	uc011mrj.1	chrX:100663001	-	chrX:100662891-100663201	10.23	1011	1						CAACTG_0.998_-_-13
GMNN	uc021ymn.1	chr6:24775158	+	chr6:24774958-24775358	11.7175	1111			G1/S						G1/S		G1/S
GMPPB	uc003cxk.1	chr3:49761384	-	chr3:49761184-49761584	8.80667	1011													TTTGGA_0.998_+_-196
GNN	uc009zuh.2	chr12:104323989	-	chr12:104323789-104324189	11.205	1111					TTTGAT_0.669_-_18	TTCGGGC_1.000_-_-32 TTCCCCG_0.999_-_185		AAACA_1.000_+_-142						CGGGCC_0.959_+_-184_GGTGAA_1.000_-_-174 TCGGGC_0.950_+_-185_TTTCAC_1.000_+_-175
GOLT1B	uc001rez.2	chr12:21654698	+	chr12:21654498-21654857	16.245	1111						TTCCGGG_0.923_+_-126 TTCCCGC_0.977_+_-156		AAACA_1.000_-_41
GORASP2	uc002ugj.3	chr2:171784947	+	chr2:171784747-171785147	8.60333	1011
GPD2	uc002tzd.4	chr2:157292899	+	chr2:157292699-157293099	11.1133	1011			G1/S									G1/S
GSG2	uc002fwp.3	chr17:3627196	+	chr17:3627038-3627229	18.35	1111				TTTGAA_0.971_+_8	TTTGAA_0.971_+_8			AAACA_0.909_-_0					TTTGAA_0.971_+_8
GTF3C2	uc002rjv.1	chr2:27579868	-	chr2:27579668-27580068	10.51	1011								AAACA_1.000_-_137
GTSE1	uc011aqy.2	chr22:46692637	+	chr22:46692437-46692837	11.68	1111		1	G2/M	TTTGAA_0.953_-_104 TTTAAA_0.947_+_146	TTTGAA_0.953_-_104 TTTAAA_0.947_+_146				G2/M	G2/M	G2/M	G2/M	TTTGAA_0.953_-_104 TTTAAA_0.947_+_146 TTTAAA_0.947_-_146
H2AFX	uc001pvg.3	chr11:118966177	-	chr11:118966104-118966377	17.0175	1111	1	1	G2	TTTGAA_0.999_-_-163	TTTGAA_0.999_-_-163	TTGCCCG_0.994_-_-176	TAACTG_0.967_-_3		G2		G2/M	G2/M	TTTGAA_0.999_-_-163 TTTCAA_1.000_+_-164
H2AFZ	uc003hvn.1	chr4:100871512	-	chr4:100871327-100871712	11.5067	1011	1	1		TTTGAA_1.000_+_83 TTCGAA_0.997_+_178	TTTGAA_1.000_+_83 TTCGAA_0.997_+_178	TTCCCGG_1.000_+_22 TTCCCCC_0.983_+_-127							TTTGAA_1.000_+_83 TTCGAA_0.997_+_178 TTCGAA_0.997_-_178
HAT1	uc010fqi.2	chr2:172778934	+	chr2:172778734-172779010	13.1775	1111			G2/M			TTCCGGC_1.000_+_13					G2/M
HAUS5	uc002oam.1	chr19:36103645	+	chr19:36103445-36103696	9.14	1011
HAUS6	uc003znk.3	chr9:19102902	-	chr9:19102702-19103102	12.855	1111					TTTGAG_0.113_+_96
HAUS8	uc002nfe.3	chr19:17186343	-	chr19:17186232-17186543	8.3475	1111						TTCCCGC_1.000_-_102
HCCS	uc004cuj.3	chrX:11129405	+	chrX:11129205-11129605	8.065	1111
HCN3	uc010pfz.1	chr1:155247373	+	chr1:155247173-155247381	15.1	1011
HEATR1	uc001hye.2	chr1:236767841	-	chr1:236767641-236768041	10.4475	1111
HELLS	uc009xuo.3	chr10:96305573	+	chr10:96305373-96305678	12.6425	1111			S-phase			TTCCCGC_0.999_+_-35			S-phase		G1/S	G1/S
HINT3	uc003qal.4	chr6:126277860	+	chr6:126277660-126278060	10.0167	1011			G2						G2
HIRIP3	uc002dve.3	chr16:30007417	-	chr16:30007217-30007617	10.8	1011			G2/M								G2/M
HIST1H1C	uc003nfw.3	chr6:26056699	-	chr6:26056656-26056899	18.9	1011			S-phase					AAACA_1.000_+_-119 AAATA_0.976_-_-146		S-phase	G2/M
HIST1H2AB	uc003nft.1	chr6:26033796	-	chr6:26033796-26033996	14.2633	1011			S-phase							S-phase			TTTGCA_0.999_-_-168
HIST1H2AC	uc003ngm.3	chr6:26124372	+	chr6:26124172-26124460	10.055	1111			S-phase		TTTGAT_0.630_-_-37				S-phase	S-phase			TTTGCA_0.999_-_-101 TTGGAA_0.997_+_-143
HIST1H2AD	uc003ngw.3	chr6:26199471	-	chr6:26199471-26199671	13.0025	1111			S-phase		TTTGAT_0.237_-_-116					S-phase
HIST1H2AE	uc003nha.1	chr6:26217147	+	chr6:26216947-26217202	11.2433	1011	1		S-phase		TTTGAT_0.479_-_-64					S-phase			TTTGCA_0.996_-_-189
HIST1H2AG	uc003niw.3	chr6:27100816	+	chr6:27100616-27100850	20.6575	1111	1	1	S-phase							S-phase
HIST1H2AH	uc003niz.3	chr6:27114907	+	chr6:27114707-27114907	14.655	1111	1		S-phase			TTCGCGC_0.996_+_-70				S-phase
HIST1H2AJ	uc003njn.1	chr6:27782518	-	chr6:27782518-27782718	16.12	1111			S-phase			TTCGCGC_0.965_+_-87						S
HIST1H2AK	uc003njs.3	chr6:27806117	-	chr6:27806117-27806317	16.3	1011	1		S-phase		TTTGAT_0.266_-_-163					S-phase
HIST1H2AL	uc003njw.3	chr6:27833106	+	chr6:27832906-27833132	21.2	1111	1		S-phase			TTCGCGC_0.986_+_-60				S-phase
HIST1H2AM	uc003nkb.1	chr6:27860963	-	chr6:27860927-27861163	13.2767	1011			S-phase		TTTGAT_0.475_-_-126				S-phase	S-phase		S
HIST1H2BC	uc003ngl.3	chr6:26124132	-	chr6:26124132-26124332	10.055	1111			S-phase						S-phase	S-phase			TTGGAA_0.997_-_-103 TTTGCA_0.999_+_-145
HIST1H2BD	uc003ngs.3	chr6:26158348	+	chr6:26158148-26158397	10.4733	1011			S-phase	TTTGAA_1.000_+_-42	TTTGAA_1.000_+_-42					S-phase		S	TTTGAA_1.000_+_-42
HIST1H2BE	uc003ngt.3	chr6:26184023	+	chr6:26183823-26184023	10.7833	1011					TTTGTA_0.168_-_-67
HIST1H2BF	uc003ngx.3	chr6:26199786	+	chr6:26199586-26199786	13.0025	1111	1		S-phase							S-phase
HIST1H2BG	uc003ngz.2	chr6:26216872	-	chr6:26216871-26217072	11.2433	1011	1		S-phase							S-phase			TTTGCA_0.996_+_-92
HIST1H2BH	uc003nhh.3	chr6:26251878	+	chr6:26251678-26251878	18.54	1111			S-phase		TTTGTA_0.189_-_-69 CTTGAA_0.241_+_-149 TTTGAT_0.498_-_-162					S-phase			TTTGCA_0.996_+_-84
HIST1H2BI	uc003nhk.3	chr6:26273203	+	chr6:26273003-26273203	13.3575	1111	1		S-phase							S-phase
HIST1H2BJ	uc003niv.3	chr6:27100575	-	chr6:27100529-27100775	20.6575	1111	1	1	S-phase							S-phase
HIST1H2BK	uc003nix.2	chr6:27114637	-	chr6:27114577-27114837	14.655	1111	1		S-phase							S-phase			TTTGCA_0.994_+_-46
HIST1H2BL	uc003njl.3	chr6:27775709	-	chr6:27775684-27775909	17.395	1111	1		S-phase			TTCGCGC_0.997_-_-200				S-phase
HIST1H2BM	uc003njo.3	chr6:27782821	+	chr6:27782621-27782821	16.12	1111			S-phase							S-phase			TTTGCA_0.994_+_-68
HIST1H2BN	uc003njv.3	chr6:27806439	+	chr6:27806239-27806439	13.9325	1111	1		S-phase		TTTGAT_0.266_+_-165					S-phase
HIST1H2BO	uc003nkc.1	chr6:27861202	+	chr6:27861002-27861240	13.2767	1011			S-phase		TTTGAT_0.475_+_-119					S-phase
HIST1H3A	uc003nfp.1	chr6:26020717	+	chr6:26020517-26020717	8.2	1111			S-phase							S-phase
HIST1H3B	uc003nfs.1	chr6:26032288	-	chr6:26032288-26032488	19.665	1111	1		S-phase		TTTGAA_0.309_+_-111					S-phase		S
HIST1H3C	uc003nfv.3	chr6:26045638	+	chr6:26045438-26045638	17.3425	1111
HIST1H3E	uc003nhc.4	chr6:26225382	+	chr6:26225182-26225382	11.825	1111
HIST1H3F	uc003nhg.1	chr6:26250835	-	chr6:26250833-26251035	18.54	1111			G2							G2
HIST1H3G	uc003nhi.3	chr6:26271612	-	chr6:26271612-26271812	15.92	1111	1		S-phase		TTTGAA_0.759_+_-99					S-phase
HIST1H3H	uc003njm.3	chr6:27775976	+	chr6:27775776-27776176	17.395	1111	1		S-phase			TTGGCGC_1.000_-_46 TTCGCGC_0.997_+_-74				S-phase
HIST1H4C	uc003ngi.3	chr6:26104175	+	chr6:26103975-26104175	10.1	1011	1		S-phase		TTTGAT_0.888_-_-166 TTTGTA_0.321_+_-50			AAATA_0.983_-_-46	S-phase	G2	G2/M	S	ATTGAA_0.997_-_-69 TTTCAA_0.994_+_-70
HIST2H2AA3	uc001esw.3	chr1:149814318	-	chr1:149814265-149814518	32.7667	1011			S-phase		TTTGAT_0.342_-_-65					S-phase
HIST2H2AA3	uc001esx.3	chr1:149822627	+	chr1:149822427-149822680	33.9833	1011			S-phase		TTTGAT_0.384_-_-63					S-phase
HIST2H2AB	uc001ete.3	chr1:149859466	-	chr1:149859466-149859666	9.13	1011	1		S-phase	TTTGAT_1.000_-_-69	TTTGAT_1.000_-_-69 TTTGAT_0.869_-_-115					S-phase		S	TTTGAT_1.000_-_-69
HIST2H2AC	uc001etd.3	chr1:149858524	+	chr1:149858324-149858524	18.9925	1111			S-phase		TAGGAA_0.503_+_-95					S-phase		S
HIST2H2BC	uc021oxz.1	chr1:149822340	-	chr1:149822340-149822540	33.9833	1011
HIST2H2BE	uc001etc.3	chr1:149858232	-	chr1:149858190-149858432	18.9925	1111			G1/S						M/G1	S-phase		G1/S	TTTGCA_1.000_+_-46
HIST2H2BF	uc010pbk.2	chr1:149783928	-	chr1:149783878-149784128	14.1875	1111			S-phase							S-phase			TTTGCA_0.997_+_-46
HIST2H3C	uc001esv.3	chr1:149812765	-	chr1:149812729-149812965	29.0625	1111
HIST2H3C	uc001esy.3	chr1:149824180	+	chr1:149823980-149824216	30.1725	1111						TTGGGCG_0.931_-_-67							TTTCAA_0.981_+_-82
HIST2H3D	uc010pbl.2	chr1:149785236	-	chr1:149785236-149785436	14.295	1111
HIST2H4A	uc001ess.3	chr1:149804220	+	chr1:149804020-149804248	12.0533	1011			S-phase			TTCCCGC_0.963_+_-76				S-phase		G1/S
HIST2H4A	uc001etb.3	chr1:149832725	-	chr1:149832697-149832925	12.0533	1011			S-phase			TTCCCGC_0.923_+_-78				S-phase		G1/S
HIST3H2A	uc001hsy.3	chr1:228645560	-	chr1:228645518-228645760	12.1033	1011			S-phase		TTCGAT_0.315_-_-78				S-phase	S-phase		S
HIST3H2BB	uc001hsz.3	chr1:228645807	+	chr1:228645607-228645830	12.1033	1011				TTTGAA_0.989_+_-47	TTCGAT_0.315_+_-175 TTTGTA_0.370_-_-32 TTTGTA_0.238_-_-41 TTTGAA_0.989_+_-47								TTTGAA_0.989_+_-47
HIST3H3	uc001hsx.1	chr1:228613026	-	chr1:228613026-228613226	8.31	1111
HJURP	uc002vvg.3	chr2:234763212	-	chr2:234763146-234763412	15.9425	1111		1	G2/M	TTTGAA_0.959_+_-81	TTTGAG_0.313_+_2 TTTGAA_0.959_+_-81					G2/M		G2	TTTCAA_0.963_-_-80 TTTGAA_0.959_+_-81
HLTF	uc003ews.1	chr3:148804341	-	chr3:148804141-148804541	8.44	1011					TTTGAA_0.612_+_-99	TTCCCGC_0.983_+_-173
HMGB1	uc001uta.1	chr13:31040081	-	chr13:31039881-31040281	12.8275	1111						TTGGCGG_1.000_+_-31 TTGGCCC_0.999_-_-55 TTGCCCC_1.000_-_97 TTGCGCG_1.000_+_-139 TTGCCCG_0.938_+_-166		AAACA_1.000_-_-131					ATTGAA_1.000_-_-128 TTTCAA_1.000_+_-129 TCTGAA_1.000_-_-146
HMGB2	uc011ckc.1	chr4:174254920	-	chr4:174254800-174255120	19.145	1111			G2			TTGGGCG_0.971_+_3			G2	G2/M	G2/M	G2
HMMR	uc003lzf.3	chr5:162887516	+	chr5:162887316-162887698	30.7225	1111	1	1	G2/M	TTTGAA_0.989_+_94	TTTGAA_0.989_+_94 TTTGAA_0.395_+_100				G2/M	M/G1	G2/M	G2	TTTGAA_0.989_+_94
HNRNPA0	uc003lbt.3	chr5:137090039	-	chr5:137089839-137090239	12.0967	1011			M/G1			TTCCCCG_0.989_+_147 TTGGGCC_0.965_-_189						M/G1		TGCGCG_1.000_+_-33_GCTGAA_1.000_-_-23
HNRNPA1	uc001sfm.3	chr12:54674487	+	chr12:54674287-54674591	8.88667	1011	1					TTCGGCG_0.986_-_63
HNRNPA2B1	uc003sxr.4	chr7:26240413	-	chr7:26240213-26240613	10.7775	1111	1	1				TTCCCCC_1.000_-_4 TTGGCGG_1.000_+_-54 TTCCCGC_0.987_+_-63 TTCCCGC_1.000_-_182		AAACA_0.997_-_92						GGGGGG_1.000_+_3_CTAGAA_1.000_-_13
HNRNPA3	uc002ulb.1	chr2:178077421	+	chr2:178077221-178077527	8.46333	1011				TTTGAG_1.000_-_101	TTTGAG_1.000_-_101	TTCCGCG_0.915_-_16							ATTGAA_1.000_+_69 TTGGAA_1.000_+_81 TTTGAG_1.000_-_101
HNRNPAB	uc003miu.3	chr5:177631507	+	chr5:177631307-177631707	9.94	1011													TTAGAA_1.000_-_-144	CGCGCG_0.968_+_-152_TTTTAG_0.998_-_-142 TCGCGC_0.935_+_-153_TCTAAA_0.999_+_-143 TCGCGC_0.935_+_-153_TTTAGA_0.999_-_-143
HNRNPH2	uc004ehm.3	chrX:100663120	+	chrX:100662920-100663320	10.23	1011	1			TTTGAG_1.000_+_147	TTTGAG_1.000_+_147		CAACTG_0.998_+_-112						TTTGAG_1.000_+_147
HNRNPL	uc021uuh.1	chr19:39340617	-	chr19:39340606-39340817	10.27	1011						TTGGGGG_1.000_-_-30
HNRNPUL1	uc010ehm.3	chr19:41770119	+	chr19:41769919-41770319	12.0133	1011				TTTGAA_0.981_+_33	TTTGAA_0.981_+_33 TTTGAG_0.206_+_160	TTCCCGC_1.000_+_-51	CAACGG_0.945_-_76						TTTGAA_0.981_+_33 TTTCAA_0.963_-_34
HSCB	uc003aea.3	chr22:29138042	+	chr22:29137842-29138083	14.195	1111		1		TTTGAT_0.951_-_-195	TTTGAT_0.951_-_-195								TTTGAT_0.951_-_-195
HSD17B7P2	uc010qex.1	chr10:38645307	+	chr10:38645107-38645382	12.5675	1111
HSP90B1	uc010swg.1	chr12:104324188	+	chr12:104323988-104324293	11.205	1111						TTCGGGC_1.000_+_-174		AAACA_1.000_-_-62
HSPA13	uc011abx.2	chr21:15755509	-	chr21:15755440-15755709	8.00333	1011		1
HSPB6	uc002obn.1	chr19:36247930	-	chr19:36247909-36248130	13.73	1011								AAATA_1.000_+_-113 AAACA_1.000_-_-126					TTAGAA_1.000_-_-117
HSPBAP1	uc003efu.2	chr3:122512666	-	chr3:122512527-122512866	11.5367	1011					TTTGAT_0.662_-_-64			AAACA_0.995_+_-60
ID3	uc001bhh.4	chr1:23886285	-	chr1:23886085-23886485	9.93	1011			G1/S	TTTGAG_0.934_-_-7 TTTGAG_0.999_+_45 TTCGAG_1.000_-_-54 TTTAAA_0.969_+_56 TTTGAA_1.000_+_114 CTTGAA_1.000_+_-140	TTTAAA_0.969_+_56 TTTGAA_1.000_+_114 CTTGAA_1.000_+_-140 TTTGAG_0.934_-_-7 TTTGAG_0.999_+_45 TTCGAG_1.000_-_-54	TTCGGCG_1.000_+_137		AAACA_1.000_-_165		G1/S			TTTGAG_0.934_-_-7 TTTGAG_0.999_+_45 TTTTAA_0.969_+_55 TTTAAA_0.969_+_56 TTTAAA_0.969_-_56 TTTGAA_1.000_+_114 TTTCAA_1.000_-_-139 CTTGAA_1.000_+_-140 TTTGCA_1.000_+_167
IFT80	uc003fdd.2	chr3:160117320	-	chr3:160117120-160117520	19.3875	1111	1			TTTGAA_0.906_+_-49 TTTGTA_1.000_-_-84 TTCGAG_1.000_-_-101 TTTGTA_1.000_-_-107 TTCGAG_1.000_-_-127	TTTGTA_1.000_-_-107 TTCGAG_1.000_-_-127 TTTGAA_0.906_+_-49 TTTGTA_1.000_-_-84 TTCGAG_1.000_-_-101	TTGCGCG_1.000_-_-76		AAATA_1.000_+_-110 AAACA_0.994_-_-149					TTTCAA_0.927_-_-48 TTTGAA_0.906_+_-49 TTTGTA_1.000_-_-84 TTTGTA_1.000_-_-107
IMMT	uc010ytf.1	chr2:86422893	-	chr2:86422693-86423093	8.71667	1011						TTCCGGG_0.996_-_127
INCENP	uc009ynw.1	chr11:61891444	+	chr11:61891244-61891644	17.23	1111	1	1	G2/M	TTTGAA_1.000_+_29	TTTGAA_1.000_+_29 TTTGAT_0.638_+_-36	TTCGCCC_0.989_+_45 TTCCCCG_0.994_+_-108 TTCCGGG_0.911_-_-145				M/G1		G2/M	TTTGAA_1.000_+_29 TTTCAA_1.000_-_30
ING3	uc003vjl.3	chr7:120590816	+	chr7:120590616-120590950	9.15667	1011						TTGCCGG_0.922_+_12 TTGGCGC_1.000_-_-25		AAATA_1.000_+_89
INO80E	uc002dvg.1	chr16:30007530	+	chr16:30007330-30007631	10.8	1011
INTS7	uc001hiy.2	chr1:212209002	-	chr1:212208802-212209202	15.045	1111			S-phase			TTCCCGC_0.999_-_13 TTGGCGC_1.000_-_-88 TTGGCGG_1.000_-_-100 TTCCGCG_0.984_-_121			S-phase			G1/S
IPMK	uc001jkb.3	chr10:60027694	-	chr10:60027494-60027894	9.38333	1011													TCTGAA_0.968_-_185
IQGAP3	uc001fpf.3	chr1:156542396	-	chr1:156542321-156542596	18.2725	1111			G2/M	TTTGTA_0.998_-_-39 TTTGAA_1.000_-_50	TTTGTA_0.998_-_-39 TTTGAA_1.000_-_50	TTGGGCC_0.999_-_33	CAACGG_0.999_+_37			G2/M			TTTGTA_0.998_-_-39 TTTGAA_1.000_-_50	CGGCGG_1.000_+_40_TTCAAA_1.000_+_50
ISCU	uc009zuy.3	chr12:108956293	+	chr12:108956093-108956398	9.29333	1011
ITGB3BP	uc001dbb.2	chr1:63988944	-	chr1:63988804-63989144	20.99	1111			G2/M								G2/M
JRKL	uc001pfy.2	chr11:96123157	+	chr11:96122957-96123357	8.37667	1011					TTTGAG_0.816_+_104	TTCCGGG_0.980_+_4
KAT7	uc010wmb.2	chr17:47865980	+	chr17:47865780-47866180	7.46333	1011				TTTGAA_0.965_-_-66	TTTGAA_0.965_-_-66	TTCCGGC_1.000_-_21 TTGGGGC_1.000_-_-168 TTCGGGC_0.998_-_181		AAACA_1.000_+_-163					TTTGAA_0.965_-_-66
KAZALD1	uc001ksr.3	chr10:102820998	+	chr10:102820798-102821198	17.4275	1111				TTCGAG_0.932_-_151	TTCGAG_0.932_-_151
KBTBD6	uc001uxu.1	chr13:41706936	-	chr13:41706736-41707136	9.68	1011	1
KCTD9	uc003xeo.3	chr8:25315984	-	chr8:25315784-25316184	15.6625	1111		1	G2/M			TTCCCCC_0.999_-_-15						G2/M
KDM4D	uc001pfe.3	chr11:94706844	+	chr11:94706644-94707044	14.1825	1111				TTTGAA_0.999_+_36	TTTGAA_0.999_+_36 CTTGAA_0.127_-_82	TTCCGGG_0.998_-_-83							TTTGAA_0.999_+_36 TTTCAA_0.990_-_37	GGGCGG_1.000_+_27_TTGAAA_0.990_+_37 GGGGCG_1.000_+_26_TTCAAA_0.999_-_36
KHSRP	uc002mer.4	chr19:6424822	-	chr19:6424712-6425022	8.99	1011						TTCCCGC_0.995_+_33								TCCGCG_0.999_+_6_TGTGGA_0.997_+_16
KIAA0101	uc002ank.3	chr15:64673702	-	chr15:64673570-64673902	17.915	1111			S-phase		TTTGAA_0.183_+_124	TTCCCGC_0.996_-_16			S-phase		G2/M	S
KIAA1009	uc010kbp.3	chr6:84937335	-	chr6:84937135-84937535	7.3625	1111
KIAA1524	uc010hpw.1	chr3:108308491	-	chr3:108308291-108308691	14.56	1111	1	1	G2		TTTGAT_0.463_-_188				G2			M/G1
KIAA1731	uc009ywb.1	chr11:93394815	+	chr11:93394615-93395015	11.38	1011			S-phase	TTTGAA_1.000_+_-15	TTTGAA_1.000_+_-15	TTGGCGG_1.000_+_-26						S	TTTGAA_1.000_+_-15	GGCGGG_1.000_+_-24_ATTCAA_1.000_-_-14 TGGCGG_1.000_+_-25_TTCAAA_1.000_-_-15
KIF11	uc001kic.3	chr10:94352824	+	chr10:94352624-94353024	12.4775	1111	1	1	G2	TTTGAA_0.999_-_35	TTTGAA_0.999_-_35				G2	G2/M	G2/M	G2	TTTCAA_0.994_+_34 TTTGAA_0.999_-_35
KIF14	uc010ppk.1	chr1:200589862	-	chr1:200589662-200590062	17.97	1111		1	G2/M	TTTGAA_0.996_-_-17	TTTGAA_0.996_-_-17	TTCCGGG_0.984_+_-93			G2/M	G2/M	G2/M		TTTGAA_0.996_-_-17	CGGGGC_0.999_+_-28_ATTCAA_0.999_+_-18 GGGGCG_0.999_+_-27_TTCAAA_0.996_+_-17
KIF15	uc003cnx.4	chr3:44803208	+	chr3:44803094-44803357	17.8475	1111	1		G2/M	TTTGAA_0.984_-_43	TTTGAA_0.984_-_43	TTGGCGC_0.996_-_35					G2/M	G2	TTTGAA_0.984_-_43
KIF18A	uc001msd.3	chr11:28129746	-	chr11:28129546-28129946	17.4325	1111	1	1	G2/M	TTTGAA_0.997_+_32	TTTGAA_0.997_+_32					G2/M	M/G1	G2	TTTGAA_0.997_+_32
KIF20A	uc003lcj.3	chr5:137514416	+	chr5:137514303-137514616	34.095	1111		1	G2/M			TTGGCCC_0.980_+_-111				M/G1		G2/M
KIF20B	uc001kgr.1	chr10:91461366	+	chr10:91461166-91461566	11.115	1111	1	1	G2/M	TTTGAA_1.000_+_5 TTTGAA_0.999_+_11	TTTGAA_1.000_+_5 TTTGAA_0.999_+_11			AAACA_1.000_-_3		G2/M		G2	TTTGAA_1.000_+_5 TTTGAA_0.999_+_11 TTTCAA_0.995_-_12	CCGCCC_0.964_+_-127_ATTGGA_0.927_+_-117 CGCCCC_0.994_+_-126_TTGGAG_0.945_+_-116 GCCGCC_0.977_+_-5_TTCAAA_1.000_-_5
KIF22	uc002dts.3	chr16:29802057	+	chr16:29801857-29802080	12.1433	1011			G2	TTCGAA_0.997_+_-12	TTCGAA_0.997_+_-12				G2		G2/M		TTCGAA_0.997_+_-12 TTCGAA_0.997_-_-12
KIF23	uc002asb.3	chr15:69706626	+	chr15:69706426-69706804	14.8967	1011	1	1	G2	TTTGAA_1.000_+_7	TTTGAA_1.000_+_7	TTGGCCC_0.989_+_-1			G2	G2/M	G2/M	G2	TTTGAA_1.000_+_7 TTTCAA_0.999_-_8
KIF24	uc003zua.4	chr9:34329198	-	chr9:34328998-34329398	14.9675	1111		1		TTCGAA_1.000_+_-68	TTCGAA_1.000_+_-68	TTGGCGG_0.993_+_-55							TTCGAA_1.000_+_-68 TTCGAA_1.000_-_-68
KIF2C	uc010olb.2	chr1:45205489	+	chr1:45205289-45205604	26.4825	1111	1	1	G2/M	TTTAAA_1.000_+_17	TTTAAA_1.000_+_17	TTGCGCG_0.911_+_5			G2/M	G2/M	G2/M	G2/M	TTTAAA_1.000_+_17 TTTAAA_1.000_-_17	CGCGCG_1.000_+_8_GTTTAA_1.000_-_18 TGCGCG_0.943_+_6_ATTTAA_0.999_+_16
KIF4A	uc004dyg.3	chrX:69509878	+	chrX:69509678-69510078	12.3575	1111	1		G2/M	TTTGAA_0.992_+_42	TTTGAA_0.992_+_42	TTGGCGG_1.000_+_50					M/G1	G2/M	TTTGAA_0.992_+_42 TTTCAA_0.999_-_43
KIFC1	uc011drf.2	chr6:33359312	+	chr6:33359112-33359512	18.6775	1111		1	G2						G2	G2/M	G2/M
KLHL7	uc011jyt.2	chr7:23145352	+	chr7:23145152-23145552	8.01667	1011			G2									G2
KNTC1	uc001ucv.3	chr12:123011808	+	chr12:123011608-123012008	10.7875	1111			S-phase		TTCGAG_0.355_+_-80	TTGGCGG_1.000_-_-17						S
KPNA2	uc002jgk.3	chr17:66031847	+	chr17:66031647-66032047	11.1775	1111	1	1	G2	TTTAAA_1.000_+_-26 TTCGAG_1.000_-_-64 TTTGAA_1.000_-_-95	TTCGAG_1.000_-_-64 TTTGAA_1.000_-_-95 TTTGAG_0.137_+_12 TTTAAA_1.000_+_-26	TTCCCGG_1.000_-_-34		AAACA_1.000_-_-100	G2		G2/M	G2/M	TTTAAA_1.000_+_-26 TTTAAA_1.000_-_-26 TTTGAA_1.000_-_-95 TTTCAA_1.000_+_-96
KPNB1	uc002ilt.1	chr17:45727274	+	chr17:45727074-45727474	9.18667	1011		1	M/G1	CTTGAA_0.978_+_-153	CTTGAA_0.978_+_-153	TTCCGCG_0.922_+_-87	TAACTG_0.981_-_-97		M/G1				CTTGAA_0.978_+_-153
LARP7	uc003ibb.3	chr4:113558611	+	chr4:113558411-113558811	13.99	1111			M/G1						M/G1
LENG1	uc002qdm.3	chr19:54663446	-	chr19:54663433-54663646	13.46	1111
LEPREL4	uc002hxt.3	chr17:39968451	-	chr17:39968394-39968615	8.49333	1011
LIN9	uc001hqa.2	chr1:226497198	-	chr1:226496998-226497398	8.60333	1011						TTCCGCG_0.951_-_8 TTCCCGC_0.988_+_-14
LLPH	uc010ssw.2	chr12:66524533	-	chr12:66524333-66524733	9.8125	1111
LMNB1	uc003kud.2	chr5:126112314	+	chr5:126112114-126112514	10.1175	1111		1	G2	TTTGAA_0.948_+_81	TTTGAA_0.948_+_81	TTCCGGG_0.983_-_128 TTCCCGC_0.955_+_148			G2	M/G1	M/G1		TTTGAA_0.948_+_81
LOC100133315	uc021qmt.1	chr11:71639493	-	chr11:71639293-71639693	10.49	1011						TTGGCGG_0.998_+_12
LOC642846	uc010sgq.1	chr12:9436288	+	chr12:9436088-9436488	28.6225	1111
LOC81691	uc002dhv.3	chr16:20817766	+	chr16:20817752-20817966	15.5575	1111			G2/M	TTTGAA_0.933_-_52	TTTGAA_0.933_-_52						G2/M		TTTGAA_0.933_-_52
LRR1	uc010ank.3	chr14:50065414	+	chr14:50065214-50065614	13.2775	1111
LRRC49	uc002asw.3	chr15:71184927	+	chr15:71184727-71185127	12.1425	1111				TTTGTA_0.945_-_-66	TTTGTA_0.945_-_-66	TTCGCGC_1.000_+_-59							TTTGTA_0.945_-_-66
LRTOMT;LRTOMT	uc010rqu.2	chr11:71791376	+	chr11:71791176-71791576	8.86667	1011
LSM3	uc003byn.3	chr3:14220227	+	chr3:14220068-14220360	13.7525	1111				TTTGAA_1.000_+_126	TTTGAA_1.000_+_126	TTCCCGC_0.976_-_108							TTTGAA_1.000_+_126 TTTCAA_1.000_-_127	GGGCGC_0.988_+_116_TTCAAA_1.000_-_126
LSM5	uc003tct.2	chr7:32530023	-	chr7:32529977-32530223	19.85	1111		1		TTTGAA_0.995_-_-4	TTTGAA_0.995_-_-4	TTCCGGC_1.000_+_32							TTTGAA_0.995_-_-4 TTTCAA_0.998_+_-5
LTN1	uc002ymr.2	chr21:30365277	-	chr21:30365264-30365477	11.11	1011					TAGGAA_0.684_-_-101
MAD2L1	uc003idl.2	chr4:120988013	-	chr4:120987889-120988213	17.23	1111			G2	TTTGAA_0.998_+_33	TTTGAA_0.998_+_33	TTGGCGG_0.960_+_43			G2		G2/M		TTTGAA_0.998_+_33 TTTCAA_0.977_-_34
MAEA	uc003gda.3	chr4:1283671	+	chr4:1283471-1283701	10.67	1011					CTTGAA_0.642_-_25
MALT1	uc002lhm.1	chr18:56338617	+	chr18:56338417-56338817	10.8133	1011						TTCCGCC_0.996_+_151
MAP3K7	uc003pob.1	chr6:91296907	-	chr6:91296707-91297107	17.69	1111						TTCCGCC_0.997_-_115 TTCCCGC_0.998_+_-201
MARCKS	uc003pvy.4	chr6:114178526	+	chr6:114178326-114178726	8.29	1011				TTTGTA_1.000_-_74 TTTGAA_1.000_-_-134 TTTGAT_1.000_+_184	TTTGAT_1.000_+_184 TTTGTA_1.000_-_74 TTCGAA_0.398_+_109 TTTGAA_1.000_-_-134	TTGGGCG_1.000_+_2 TTGGCCG_1.000_+_-54		AAATA_1.000_-_-171 AAATA_1.000_-_-191					TTTGTA_1.000_-_74 TTTGCA_1.000_-_-123 TTTGCA_1.000_+_-125 TTTGAA_1.000_-_-134 TTTCAA_1.000_+_-135 TTTGGA_0.999_+_-169 TTTGAT_1.000_+_184 TTTTAA_1.000_+_-187	CGCCCC_1.000_+_-83_TTTGTG_1.000_+_-73
MASTL	uc009xkw.2	chr10:27443752	+	chr10:27443552-27443952	20.295	1111			S-phase						S-phase			G1/S
MCM2	uc011bkm.2	chr3:127317252	+	chr3:127317052-127317309	7.61667	1011			G1/S			TTCGCGC_0.996_+_5			G1/S		G1/S
MCM3	uc011dwu.1	chr6:52149582	-	chr6:52149472-52149782	13.5767	1011			G1/S		TTTGAT_0.407_+_-83	TTCCCGC_1.000_-_18 TTCGCGC_0.990_+_38 TTCCCGC_0.995_+_-132					G1/S
MCM4	uc003xqk.2	chr8:48872762	+	chr8:48872686-48872962	11.095	1111			G2/M						G2/M		G1/S	G1/S
MCM5	uc003anv.4	chr22:35796115	+	chr22:35795915-35796315	13.4025	1111			G1/S			TTCCCGC_0.999_+_15 TTCCGGG_0.948_-_-147 TTCGCGC_0.998_+_-180			G1/S	G1/S	G1/S	G1/S
MCM7	uc003usx.1	chr7:99699427	-	chr7:99699395-99699502	13.905	1111			G2/M								G2/M
MCM8	uc002wmk.3	chr20:5931297	+	chr20:5931097-5931497	13.62	1111			S-phase			TTGGCGC_0.998_-_27			S-phase
MDC1	uc003nrg.4	chr6:30685458	-	chr6:30685258-30685658	13.075	1111				TTTGAG_0.999_-_-190	TTTGAT_0.789_-_-128 TTTGAG_0.999_-_-190	TTCCCGC_0.999_-_126							TTGGAA_0.938_+_116 TTTGAG_0.999_-_-190
MDH1	uc010ypv.2	chr2:63816284	+	chr2:63816180-63816461	9.36	1111		1
MED30	uc011lib.2	chr8:118532964	+	chr8:118532764-118533115	9.52667	1011				TTTGAA_0.999_+_25	TTTGAA_0.999_+_25			AAACA_0.957_-_22					TTTGAA_0.999_+_25 TTTCAA_0.993_-_26
MELK	uc010mlm.3	chr9:36572904	+	chr9:36572704-36573104	7.91333	1011			G2	TTTGAT_0.997_+_-41	TTTGAT_0.997_+_-41	TTGGCGG_1.000_+_-31 TTCCGGC_1.000_+_-56			G2		G2/M		TTTGAT_0.997_+_-41
METTL15	uc001msg.2	chr11:28129797	+	chr11:28129597-28129997	17.4325	1111	1	1		TTTGAA_0.997_-_-89	TTTGAA_0.997_-_-89								TTTGAA_0.997_-_-89
METTL18	uc001ggn.3	chr1:169764031	-	chr1:169763831-169764231	20.115	1111
METTL2A	uc002izv.2	chr17:60501245	+	chr17:60501045-60501263	12.4933	1011						TTCCGGC_0.950_+_3
METTL2B	uc003vng.3	chr7:128116782	+	chr7:128116582-128116819	9.56667	1011						TTCCCGC_0.908_+_-54
METTL4	uc002klh.4	chr18:2571489	-	chr18:2571289-2571689	15.0475	1111	1		G2/M	TTTGAA_1.000_+_-70 TTCGAA_0.964_+_-76	TTTGAA_1.000_+_-70 TTCGAA_0.964_+_-76 TTTGAT_0.151_-_-114					G2/M		G2	TTTCAA_0.999_-_-69 TTTGAA_1.000_+_-70 TTCGAA_0.964_+_-76 TTCGAA_0.964_-_-76
MFAP1	uc001zth.1	chr15:44116951	-	chr15:44116767-44117151	13.7325	1111
MFSD11	uc002jtb.3	chr17:74733582	+	chr17:74733382-74733782	9.38333	1011						TTCGCGG_0.999_-_61 TTCCGGG_1.000_-_-107	CAACTG_0.996_-_49						TTGGAA_1.000_+_52
MIS12	uc002gce.3	chr17:5390246	+	chr17:5390046-5390446	9.22	1011
MIS18A	uc002ypi.3	chr21:33651376	-	chr21:33651325-33651576	13.2975	1111					TTTGTA_0.375_+_40
MIS18BP1	uc001wwf.3	chr14:45722605	-	chr14:45722405-45722805	14.18	1111		1	G2	TTTGAA_0.964_-_172 TTTGAA_0.991_+_178	TTTGAA_0.964_-_172 TTTGAA_0.991_+_178							G2	TTTGAA_0.964_-_172 TTTGAA_0.991_+_178	GGGCGG_0.958_+_162_TTCAAA_0.964_+_172
MKI67	uc001lke.3	chr10:129924468	-	chr10:129924268-129924668	8.76333	1011		1	G2/M						G2/M	M/G1	G2/M	G2/M
MKLN1	uc003vqs.3	chr7:131012594	+	chr7:131012394-131012658	7.67333	1011
MLF1IP	uc003iwq.3	chr4:185655286	-	chr4:185655216-185655486	22.415	1111			S-phase						S-phase		G2/M	G1/S
MLH1	uc003cgl.3	chr3:37034840	+	chr3:37034640-37035038	8.95667	1011	1				TAGGAA_0.238_+_-79	TTGGCGC_0.995_-_191
MMS22L	uc003ppb.3	chr6:97731052	-	chr6:97730852-97731252	9.81667	1011			G1/S			TTCCCGC_0.998_-_-16						G1/S
MND1	uc003ink.2	chr4:154265800	+	chr4:154265600-154265889	7.96	1011			G2	TTTGAT_0.978_-_14	TTTGAT_0.978_-_14	TTGGCGC_0.991_-_6			G2				TTTGAT_0.978_-_14
MNS1	uc002adr.2	chr15:56757335	-	chr15:56757170-56757535	15.94	1111			G1/S									G1/S
MOSPD2	uc004cwi.3	chrX:14891526	+	chrX:14891326-14891650	9.9425	1111			G1/S									G1/S
MRE11A	uc001pev.2	chr11:94227040	-	chr11:94226840-94227240	14.4875	1111			G2/M			TTCCGGG_0.988_+_-127					G2/M
MRP63	uc001unw.3	chr13:21750371	+	chr13:21750171-21750513	17.2475	1111
MRPL13	uc003ypa.3	chr8:121457647	-	chr8:121457447-121457710	20.1975	1111								AAACA_0.950_+_-18
MRPL18	uc003qsw.4	chr6:160211491	+	chr6:160211291-160211619	11.24	1011
MRPL27	uc002iqr.2	chr17:48450562	-	chr17:48450531-48450762	12.665	1111						TTCCGGG_0.982_-_-37
MRPL46	uc002bmj.2	chr15:89010633	-	chr15:89010608-89010833	10.8867	1011
MRPL51	uc001qom.2	chr12:6602471	-	chr12:6602302-6602671	8.87	1011		1
MRPS11	uc002bml.3	chr15:89010683	+	chr15:89010608-89010883	10.8867	1011
MRPS33	uc003vwe.4	chr7:140714781	-	chr7:140714581-140714981	6.93	1111
MSH5	uc003nwu.2	chr6:31707724	+	chr6:31707524-31707924	18.265	1111			G1/S	TTTGAA_0.990_+_-128	TTTGAA_0.990_+_-128 TTTGAT_0.854_-_-192	TTCCCGC_0.969_-_128 TTCCCGC_0.999_-_-136					G1/S		TTTGAA_0.990_+_-128
MSTO2P	uc010pgo.1	chr1:155715608	+	chr1:155715408-155715619	9.36	1011
MTAP	uc003zph.3	chr9:21802634	+	chr9:21802434-21802747	7.57	1011
MTBP	uc003ypc.1	chr8:121457665	+	chr8:121457465-121457710	20.1975	1111								AAACA_0.950_-_-5
MTF2	uc010oti.2	chr1:93544791	+	chr1:93544591-93544991	11.525	1111				TTTGAG_1.000_+_98	TTTGAG_1.000_+_98	TTCCCGC_1.000_-_54		AAACA_1.000_-_96					ATTGAA_0.998_+_82 TTTGAG_1.000_+_98	TCCGCG_1.000_+_51_TTTGGT_1.000_-_61
MTHFD1	uc010aqf.3	chr14:64854758	+	chr14:64854558-64854958	12.08	1011			G1/S								G1/S
MUT	uc003ozg.4	chr6:49431041	-	chr6:49430841-49431241	13.7125	1111
MUTYH	uc001cnh.3	chr1:45805787	-	chr1:45805587-45805890	9.77333	1011													TCTGAA_0.906_-_-9
MXD3	uc003mga.3	chr5:176739292	-	chr5:176739092-176739492	16.5225	1111		1		TTTGAA_1.000_+_-174 TTTGAA_1.000_-_-180	TTTGAA_1.000_+_-174 TTTGAA_1.000_-_-180	TTCCCGC_1.000_+_-157							TTTCAA_1.000_-_-173 TTTGAA_1.000_+_-174 TTTGAA_1.000_-_-180 TTTCAA_1.000_+_-181
MYO9B	uc010eak.3	chr19:17186590	+	chr19:17186390-17186790	8.3475	1111						TTCCGGG_0.990_-_-37
MZT1	uc001viu.2	chr13:73301938	-	chr13:73301740-73302138	14.875	1111	1	1	G2	TTCGAA_0.998_+_-5 TTTGAA_0.998_-_48	TTCGAA_0.998_+_-5 TTTGAA_0.998_-_48	TTCCGCG_0.975_+_21 TTCGCGG_1.000_-_-43 TTCCGCG_0.996_+_-113 TTCCGGG_1.000_+_156						G2	TTCGAA_0.998_+_-5 TTCGAA_0.998_-_-5 TTTGGA_1.000_-_42 TTTGAA_0.998_-_48
NAA38	uc003vjg.3	chr7:117824085	+	chr7:117823885-117824277	9.67667	1011
NAP1L4	uc010qxn.2	chr11:3013607	-	chr11:3013407-3013807	8.09667	1011
NASP	uc001coi.2	chr1:46049659	+	chr1:46049459-46049818	13.3733	1011			G1/S	TTTAAA_0.996_+_-29	TTTAAA_0.996_+_-29				G1/S		G1/S		TTTAAA_0.996_+_-29 TTTAAA_0.996_-_-29	CGCGCG_1.000_+_44_TTAGAG_0.996_-_54
NCAPD2	uc001qoo.2	chr12:6603297	+	chr12:6603097-6603497	8.87	1011	1	1	G2/M	TTTGAA_0.988_+_-174	TTTGAA_0.988_+_-174		CAACGG_0.998_-_-183			M/G1		G2/M	TTTGAA_0.988_+_-174
NCAPD3	uc001qhd.1	chr11:134094426	-	chr11:134094226-134094626	10.8775	1111			G2						G2
NCAPG	uc003gpp.3	chr4:17812524	+	chr4:17812324-17812700	11.4	1011	1			TTTGAA_0.989_+_43	TTTGAA_0.989_+_43 TTCGAG_0.288_+_51	TTCCCGC_0.989_-_33		AAATA_0.929_-_41					TTTGAA_0.989_+_43
NCAPG2	uc003wnv.1	chr7:158497520	-	chr7:158497320-158497720	19.195	1111				TTTGAA_0.999_+_59	TTTGAA_0.999_+_59	TTCCCGC_0.988_-_77							TTTGAA_0.999_+_59	GGCGGG_0.913_+_49_TTCAAA_0.999_-_59
NCAPH	uc010fhv.1	chr2:97001483	+	chr2:97001283-97001567	11.27	1111		1	G2	TTTAAA_0.980_+_53	TTTAAA_0.980_+_53		TAACGG_0.979_-_19		G2				TTTAAA_0.980_+_53 TTTAAA_0.980_-_53
NCBP1	uc004axq.3	chr9:100395704	+	chr9:100395504-100395904	6.53	1011						TTCCCGG_0.954_-_-10 TTCCGGG_0.908_-_158
NDC80	uc002kli.3	chr18:2571509	+	chr18:2571309-2571709	15.0475	1111	1		G2	TTTGAA_1.000_-_44 TTCGAA_0.964_+_50	TTTGAA_1.000_-_44 TTCGAA_0.964_+_50 TTTGAT_0.151_+_88				G2	G2/M		G2	TTTCAA_0.999_+_43 TTTGAA_1.000_-_44 TTCGAA_0.964_+_50 TTCGAA_0.964_-_50
NEIL3	uc010irs.3	chr4:178230990	+	chr4:178230790-178231107	17.615	1111			G2	TTTGAA_0.959_+_14	TTTGAA_0.959_+_14				G2	G2/M	G2/M	G2	TTTGAA_0.959_+_14	GCGCGC_0.981_+_4_TTCAAA_0.959_-_14
NEK2	uc001his.4	chr1:211848972	-	chr1:211848821-211849172	15.595	1111	1	1	G2/M						G2/M	M/G1	G2/M	G2/M		CCCGCG_1.000_+_-4_GTTTAA_0.983_-_6 GCCCGC_0.997_+_-5_GTTAAA_0.994_+_5 GCCCGC_0.997_+_-5_TTTAAC_0.994_-_5
NET1	uc001iia.3	chr10:5454517	+	chr10:5454317-5454655	8.85333	1011				TTTGAA_1.000_-_0 TAGGAA_0.989_+_-51	TTTGAA_1.000_-_0 TAGGAA_0.989_+_-51								TTTGAA_1.000_-_0 TTTCAA_1.000_+_-1
NEU1	uc003nxq.4	chr6:31830709	-	chr6:31830553-31830909	14.0925	1111					TTTAAA_0.782_+_80
NFATC2IP	uc010vdg.1	chr16:28962317	+	chr16:28962117-28962332	9.92	1111			G1/S			TTGGCGC_1.000_+_-181						G1/S	TCTGAA_0.999_-_-168	GGCGCC_1.000_+_-179_TTTCAG_1.000_+_-169
NFYA	uc003opp.3	chr6:41040706	+	chr6:41040506-41040906	10.5667	1011						TTGGCGG_1.000_+_171
NIF3L1	uc002uwm.2	chr2:201754049	+	chr2:201753849-201754249	13.0867	1011			G2									G2
NOL8	uc022bjx.1	chr9:95087876	-	chr9:95087676-95088076	19.09	1111
NOP58	uc010zhv.1	chr2:203130514	+	chr2:203130314-203130664	8.025	1111						TTCCCGC_0.962_-_-132
NOTCH2	uc001eik.3	chr1:120612317	-	chr1:120612117-120612517	8.2275	1111			M/G1			TTCCGCC_1.000_-_24 TTCCCGC_1.000_-_-61 TTCGGGC_1.000_+_80				M/G1		M/G1
NOTCH2NL	uc001emo.2	chr1:145209110	+	chr1:145208910-145209310	7.0575	1111			G2			TTCCGCC_1.000_-_-17 TTCGGGC_1.000_+_39 TTCCCGC_1.000_-_-102						G2
NPAT	uc001pjz.4	chr11:108093365	-	chr11:108093263-108093565	12.655	1111			G1/S		TTTGAT_0.494_+_94	TTCGGCG_1.000_+_-78			G1/S		G1/S	S
NPHP1	uc021vme.1	chr2:110962639	-	chr2:110962545-110962839	8.19	1011							CAACTG_0.913_+_59
NRD1	uc001ctc.4	chr1:52344609	-	chr1:52344409-52344809	8.465	1111			S-phase	TTCGAA_0.978_+_8	TTCGAA_0.978_+_8				S-phase				TTCGAA_0.978_+_8 TTCGAA_0.978_-_8
NSUN6	uc010qcp.1	chr10:18940550	-	chr10:18940350-18940750	7.81333	1011
NUCKS1	uc001hdb.3	chr1:205719372	-	chr1:205719172-205719572	11.2275	1111	1	1	M/G1	TTTGAT_1.000_+_53 TTTGAA_1.000_+_67 TTTGAA_0.986_-_-70	TTTGAG_0.815_+_132 TTTGAT_1.000_+_53 TTTGAA_1.000_+_67 TTTGAA_0.986_-_-70	TTGGCGC_1.000_+_34 TTGCGGC_1.000_+_-168 TTCGGGG_0.999_+_184		AAACA_1.000_-_-172	M/G1				TTTGAT_1.000_+_53 TTTGAA_1.000_+_67 TTTGAA_0.986_-_-70
NUDCD2	uc003lze.3	chr5:162887143	-	chr5:162887056-162887343	30.7225	1111		1	M/G1						M/G1
NUDT1	uc003slr.1	chr7:2281856	+	chr7:2281804-2282056	11.47	1111
NUDT15	uc001vbw.1	chr13:48611702	+	chr13:48611502-48611882	18.91	1111
NUDT2	uc022bga.1	chr9:34329503	+	chr9:34329303-34329703	14.9675	1111		1			TTTGAG_0.204_+_-32
NUDT6	uc003iew.3	chr4:123843761	-	chr4:123843727-123843961	11.5775	1111
NUF2	uc001gcr.1	chr1:163291722	+	chr1:163291522-163291922	23.6325	1111	1	1	G2/M	TTTGAA_0.997_+_38	TTTGAA_0.997_+_38	TTGCCGC_0.932_-_30			G2/M	M/G1		G2	TTTGAA_0.997_+_38 TTTCAA_0.985_-_39	GGCGGC_0.967_+_29_TTGAAA_0.985_+_39
NUMA1	uc001orq.3	chr11:71791573	-	chr11:71791373-71791773	8.86667	1011				TTTAAA_0.999_+_-24	TTTGTA_0.163_+_-182 TTTAAA_0.999_+_-24 TTTGAG_0.270_-_-108	TTCCCGG_0.972_+_-95							TTTAAA_0.999_+_-24 TTTAAA_0.999_-_-24	CGGGGC_0.982_+_-35_GTTTAA_0.993_+_-25
NUP107	uc001sug.3	chr12:69080730	+	chr12:69080530-69080845	15.715	1111						TTCCGGG_0.982_+_19 TTCCCGC_1.000_-_48
NUP133	uc001htn.3	chr1:229644088	-	chr1:229643996-229644288	8.51667	1011
NUP155	uc003jku.1	chr5:37371197	-	chr5:37371079-37371397	7.09	1011						TTGGCGC_0.993_+_10
NUP205	uc003vsw.3	chr7:135242661	+	chr7:135242461-135242692	10.7433	1011
NUP35	uc002upf.3	chr2:183989082	+	chr2:183988882-183989185	17.64	1111			G2/M	TTTGAA_1.000_+_54	TTTGAA_1.000_+_54	TTCCGCC_0.999_+_44			G2/M			G2	TTTGAA_1.000_+_54 TTTCAA_0.997_-_55	TCCGCC_1.000_+_45_TTGAAA_0.997_+_55
NUP43	uc011eef.1	chr6:150067688	-	chr6:150067631-150067888	9.81667	1011			G1/S						G1/S
NUP85	uc010wrv.1	chr17:73201596	+	chr17:73201396-73201796	9.565	1111
NUP88	uc010vsy.2	chr17:5323059	-	chr17:5322970-5323259	8.44	1011
NUPL2	uc003svu.3	chr7:23221445	+	chr7:23221245-23221645	11.92	1111
NUSAP1	uc010bce.3	chr15:41624891	+	chr15:41624759-41625091	20.3525	1111	1	1	G2	TTTAAA_0.998_+_148	TTCGAA_0.176_+_-108 TTTAAA_0.998_+_148				G2		G2/M		TTTAAA_0.998_+_148 TTTAAA_0.998_-_148
OAS3	uc001tug.3	chr12:113376248	+	chr12:113376048-113376335	7.78	1011
OIP5	uc001znp.3	chr15:41624819	-	chr15:41624759-41625019	20.3525	1111		1	G2/M		TTCGAA_0.176_+_30						M/G1	G2/M
OLFML2B	uc001gbu.3	chr1:161993644	-	chr1:161993444-161993844	16.7225	1111			M/G1			TTCCGCG_0.943_+_-51					M/G1
ORC1	uc010oni.2	chr1:52870143	-	chr1:52869943-52870343	15.8825	1111			G1/S			TTGGCGC_0.906_+_25				G1/S		G1/S
ORC3	uc003pmg.3	chr6:88299784	+	chr6:88299675-88299886	11.3767	1011						TTCCGGC_0.994_-_-31 TTCCCGC_1.000_-_57
ORC6	uc010cbe.2	chr16:46723557	+	chr16:46723357-46723617	12.81	1111
OSTC	uc003hzb.1	chr4:109571740	+	chr4:109571540-109571811	8.34333	1011						TTCCGGG_0.978_+_19
PALB2	uc002dlx.1	chr16:23652678	-	chr16:23652478-23652863	8.43	1011
PAN2	uc001skx.3	chr12:56727533	-	chr12:56727333-56727733	9.27	1111				TAGGAA_0.998_+_117	TAGGAA_0.998_+_117	TTCCCCG_0.997_+_-102 TTCCCGC_1.000_+_-197		AAATA_1.000_+_-138					TTTGGA_1.000_-_-142 TTAGAA_1.000_-_-158
PANX1	uc001per.3	chr11:93862093	+	chr11:93861893-93862293	15.86	1011
PARG	uc009xop.2	chr10:51623416	+	chr10:51623216-51623616	7.4	1011					TTTGAT_0.151_-_36	TTCCGGG_0.907_-_-25 TTGCGGC_0.974_+_-41 TTCCGGG_1.000_+_-80							TGTGAA_0.991_-_-94
PARG	uc010qgw.2	chr10:51371331	-	chr10:51371179-51371531	7.97333	1011						TTCCGGG_0.928_-_-34 TTCCGGG_0.998_+_-89
PARPBP	uc001tjd.3	chr12:102513955	+	chr12:102513755-102514155	12.7475	1111		1		TTTGAA_0.996_+_-2	TTTGAA_0.996_+_-2	TTCCGGG_1.000_+_-54							TTTGAA_0.996_+_-2	CCCGCG_0.901_+_-11_GTTCAA_0.958_-_-1
PBK	uc003xgi.3	chr8:27695349	-	chr8:27695149-27695549	16.0175	1111			G2/M		TTTGAA_0.339_+_11				G2/M		G2/M	G2
PCNA	uc002wlp.3	chr20:5100647	-	chr20:5100447-5100847	17.575	1111			G1/S						G1/S	G1/S	G1/S	G1/S
PCNT	uc002zji.4	chr21:47744035	+	chr21:47743835-47744142	11.4975	1111		1					CAACTG_0.998_-_-7	AAATA_0.999_+_40
PDZD11	uc004dye.1	chrX:69509798	-	chrX:69509598-69509998	12.3575	1111	1			TTTGAA_0.992_-_-128	TTTGAA_0.992_-_-128	TTGGCGG_1.000_-_-137							TTTGAA_0.992_-_-128 TTTCAA_0.999_+_-129
PEX3	uc011edx.1	chr6:143771917	+	chr6:143771795-143772117	7.9	1011						TTGCCGC_0.975_+_94
PFAS	uc010vuv.2	chr17:8152595	+	chr17:8152395-8152795	8.915	1111
PHB2	uc021qug.1	chr12:7079916	-	chr12:7079716-7080086	7.78667	1011				TTTGAA_1.000_+_-87	TTTGAA_1.000_+_-87	TTCCGGC_0.910_+_-100							TTTCAA_0.999_-_-86 TTTGAA_1.000_+_-87
PIAS1	uc002aqz.3	chr15:68346571	+	chr15:68346371-68346664	10.0767	1011				TTTAAA_0.996_+_-98	TTCGAG_0.123_+_-49 TTTAAA_0.996_+_-98	TTGGCGC_1.000_+_-110	TAACTG_0.999_+_-130	AAATA_1.000_-_-100					TTTAAA_0.996_+_-98 TTTAAA_0.996_-_-98 TTTGAC_0.999_-_-125	TGGCGC_1.000_+_-109_ATTTAA_0.999_+_-99
PIF1	uc002ant.2	chr15:65117838	-	chr15:65117638-65118038	11.0225	1111	1	1	G2	TTTGAA_0.990_+_-29 TTTAAA_0.988_+_-73	TTTGAA_0.990_+_-29 TTTAAA_0.988_+_-73				G2	G2/M		G2	TTTCAA_0.965_-_-28 TTTGAA_0.990_+_-29 TTTAAA_0.988_+_-73 TTTAAA_0.988_-_-73
PIGK	uc001dhk.3	chr1:77685132	-	chr1:77685087-77685332	7.85	1011
PLA2G15	uc002evr.3	chr16:68279246	+	chr16:68279046-68279329	8.4	1011		1
PLAA	uc003zqe.2	chr9:26947468	-	chr9:26947268-26947668	14.0975	1111					TTTAAA_0.586_+_-84
PLK1	uc002dlz.1	chr16:23690200	+	chr16:23690000-23690253	23.9325	1111		1	G2/M	TTTGAA_1.000_+_-19 TTTAAA_1.000_+_-78	TTTAAA_0.804_+_-138 TTTGAA_1.000_+_-19 TTTGTA_0.591_+_-42 TTTAAA_1.000_+_-78	TTCGGGG_1.000_+_-13 TTGGCCG_1.000_-_-66			G2/M	M/G1	G2/M	G2/M	TTTGAA_1.000_+_-19 TTTAAA_1.000_+_-78 TTTAAA_1.000_-_-78 TTTTAA_1.000_+_-79 TTTGGA_1.000_+_-85	GCGGGC_1.000_+_-94_TTGGAT_1.000_+_-84
PLK4	uc011cgs.2	chr4:128802015	+	chr4:128801815-128802215	19.7175	1111			G2/M	TTTGAA_1.000_-_71	TTTGAA_1.000_-_71	TTGGCGC_0.997_-_184					G2/M	G2	TTTCAA_1.000_+_70 TTTGAA_1.000_-_71	CGGCGG_0.985_+_59_TTTTCA_1.000_+_69 GGCGGG_0.999_+_60_TTGAAA_1.000_-_70
PMEL	uc001sip.3	chr12:56360496	-	chr12:56360296-56360696	8.925	1111				CTTGAA_1.000_+_-129	CTTGAA_1.000_+_-129	TTCCCGC_1.000_+_-67 TTGCCGC_1.000_+_-117		AAACA_1.000_+_-125					TTTCAA_1.000_-_-128 CTTGAA_1.000_+_-129
PNO1	uc002seh.3	chr2:68385004	+	chr2:68384804-68385066	13.045	1111			G2/M									G2/M
POC1A	uc003dcw.3	chr3:52188706	-	chr3:52188506-52188906	16.72	1111
POC5	uc003keh.4	chr5:75013313	-	chr5:75013113-75013513	10.885	1111	1		G2	TTTGAA_1.000_+_54	TTTGAT_0.616_-_-11 TTTGAA_1.000_+_54							G2	TTTGAA_1.000_+_54 TTTCAA_1.000_-_55
POLA2	uc010rod.1	chr11:65029431	+	chr11:65029231-65029631	10.2675	1111			G1/S			TTGGCGG_0.997_+_-21				G1/S
POLD1	uc002psb.4	chr19:50887592	+	chr19:50887392-50887792	8.50667	1011				TTTGAA_0.999_+_46	TTTGAA_0.999_+_46	TTCCCGC_1.000_-_33		AAACA_0.998_-_44					TTTGAA_0.999_+_46
POLE2	uc001wwu.3	chr14:50155098	-	chr14:50154921-50155298	8.71	1111			G1/S			TTGGCGC_0.999_-_160					G1/S
POLQ	uc003eee.4	chr3:121264853	-	chr3:121264724-121265053	19.515	1111			G2	TTTGAA_0.988_+_20	TTTGAG_0.104_+_14 TTTGAA_0.988_+_20	TTCCGGG_0.988_+_-6 TTCCCGC_0.995_-_31			G2		G2/M		TTTGAA_0.988_+_20
POLR2K	uc003yjf.3	chr8:101162838	+	chr8:101162638-101163038	9.11333	1011						TTCCGGC_1.000_-_23
POP7	uc003uwh.4	chr7:100303675	+	chr7:100303475-100303875	9.22667	1011
POU2F1	uc001gec.3	chr1:167190065	+	chr1:167189865-167190134	13.7125	1111			G2/M	TTTGAA_1.000_-_64	TTTGAA_1.000_-_64			AAATA_1.000_+_59		G2/M			TTTTAA_1.000_-_56 TTTGAA_1.000_-_64
PPID	uc003iqc.3	chr4:159644552	-	chr4:159644440-159644752	11.22	1111
PPIH	uc009vwl.2	chr1:43124047	+	chr1:43123847-43124117	16.915	1111						TTCCGGG_0.999_+_56
PPIL3	uc002uwh.3	chr2:201753849	-	chr2:201753649-201754049	13.0867	1011
PPIL4	uc003qmo.2	chr6:149867238	-	chr6:149867141-149867438	12.78	1011
PPM1D	uc002iyt.2	chr17:58677543	+	chr17:58677343-58677743	7.89333	1011			G1/S			TTGCGCC_0.933_-_19 TTGGCCG_1.000_+_151 TTCGGCG_0.999_+_189		AAACA_1.000_+_142				G1/S
PPP1R12B	uc009xae.2	chr1:202317829	+	chr1:202317629-202317979	10.43	1011				TTTGTA_0.999_+_-117	TTTGTA_0.999_+_-117								TTTGTA_0.999_+_-117
PPWD1	uc003jtv.4	chr5:64859130	+	chr5:64858930-64859137	21.445	1111
PRC1	uc002bqm.3	chr15:91537804	-	chr15:91537647-91538004	15.555	1111	1	1	M/G1	TTTGAA_0.928_+_18	TTTGAA_0.928_+_18		CAACGG_0.968_+_37		M/G1		G2/M		TTTGAA_0.928_+_18 TTTCAA_0.986_-_19
PRIM2	uc003pdv.1	chr6:57182421	+	chr6:57182221-57182621	11.1167	1011			S-phase						S-phase
PRKDC	uc003xqi.3	chr8:48872743	-	chr8:48872686-48872943	11.095	1111
PRPF38A	uc001ctv.4	chr1:52870218	+	chr1:52870018-52870418	15.8825	1111			G2/M			TTCGCGC_0.991_+_-110						G2/M
PRPSAP1	uc010wta.1	chr17:74350230	-	chr17:74350030-74350430	12.7175	1111			G2/M						G2/M
PSMA1	uc001mlk.3	chr11:14541991	-	chr11:14541845-14542191	7.39667	1011
PSMB3	uc002hqr.3	chr17:36909001	+	chr17:36908801-36909079	8.67333	1011													TTTGCA_0.915_+_-107
PSMC3IP	uc002iai.2	chr17:40729747	-	chr17:40729704-40729947	12.405	1111						TTCCCGC_0.997_-_30
PSMG2	uc002krk.3	chr18:12702986	+	chr18:12702786-12703106	12.84	1111					TTTGAG_0.111_-_6
PTRHD1	uc002rfm.3	chr2:25016251	-	chr2:25016246-25016342	19.2125	1111	1			TTTGTA_1.000_-_-39 TTTGAA_0.957_-_-85	TTTGTA_1.000_-_-39 TTTGAA_0.957_-_-85								TTTGTA_1.000_-_-39 TTTGAA_0.957_-_-85
PTTG1	uc003lyj.3	chr5:159848864	+	chr5:159848664-159849064	12.72	1111		1	G2/M	TTTAAA_0.994_+_-31	TTTAAA_0.994_+_-31				M/G1	M/G1	G2/M	G2/M	TTTAAA_0.994_+_-31 TTTAAA_0.994_-_-31
QPCTL	uc010xxr.2	chr19:46195740	+	chr19:46195540-46195940	20.65	1111
RACGAP1	uc009zlm.1	chr12:50419307	-	chr12:50419107-50419507	18.9125	1111	1	1	G2/M	TTTGAA_1.000_-_32	TTTGAA_1.000_-_32		CAACGG_1.000_-_66			G2/M	M/G1	G2/M	TTTCAA_1.000_+_31 TTTGAA_1.000_-_32 TTTGAC_0.999_-_-117
RAD1	uc003jix.3	chr5:34915780	-	chr5:34915580-34915843	11.7	1111			G1/S								M/G1	G1/S
RAD18	uc003brd.3	chr3:9005159	-	chr3:9005069-9005359	11.7775	1111			S-phase	TTCGAG_0.999_+_24	TTCGAG_0.999_+_24	TTCCCCG_1.000_-_16 TTCCGGC_0.927_+_-45			S-phase					CGCGGG_1.000_+_14_CTCGAA_0.999_-_24 CGCGGG_1.000_+_14_TTCGAG_0.999_+_24 GCGCGG_0.999_+_13_TTTCGA_1.000_+_23
RAD51	uc001zmi.4	chr15:40987326	+	chr15:40987126-40987526	11.54	1111			S-phase			TTGGCGG_0.990_+_38			S-phase			G1/S
RAD51AP1	uc010seq.2	chr12:4647949	+	chr12:4647749-4648105	17.145	1111			S-phase			TTCCCGC_0.993_-_86			S-phase		G1/S		ATTGAA_0.974_+_92 TTTCAA_0.971_-_93
RAD51C	uc002iwt.1	chr17:56769962	+	chr17:56769762-56770004	9.84333	1011			G2/M						G2/M		G2/M
RAD54B	uc003ygn.2	chr8:95487343	-	chr8:95487143-95487543	18.605	1111			G1/S								G1/S
RAD54L	uc001cpl.2	chr1:46713366	+	chr1:46713166-46713566	21.06	1111			S-phase	TTCGAT_1.000_-_-19 TTCGAT_1.000_+_26	TTCGAT_1.000_-_-19 TTCGAT_1.000_+_26	TTCGGCG_0.999_-_-29 TTGGCGG_0.939_+_42			S-phase		G2/M	G1/S		CGGCGG_0.962_+_16_ATCGAA_1.000_-_26 CGGCGG_0.962_+_16_TTCGAT_1.000_+_26
RANGAP1	uc003azu.3	chr22:41682216	-	chr22:41682016-41682416	8.2225	1111	1		G2	TTTGAA_1.000_-_-5 TTTGAT_1.000_-_-34 TTCGAG_0.991_-_-43	TTTGAA_1.000_-_-5 TTTGAT_1.000_-_-34 TTCGAG_0.991_-_-43				G2		G1/S		TTTGAA_1.000_-_-5 TTTCAA_1.000_+_-6 TTTGAT_1.000_-_-34
RAP1B	uc010sti.2	chr12:69004618	+	chr12:69004418-69004818	7.56	1011						TTCCCGG_1.000_+_-13 TTCCGCC_0.990_-_21
RAPGEF6	uc003kvn.2	chr5:130970929	-	chr5:130970729-130971129	12.3975	1111			G1/S		TTTAAA_0.381_+_-135			AAACA_0.995_-_65				G1/S
RARS2	uc003pme.3	chr6:88299735	-	chr6:88299675-88299886	11.3767	1011						TTCCGGC_0.994_+_-25 TTCCCGC_1.000_+_-113
RASAL2	uc001glq.3	chr1:178062863	+	chr1:178062663-178063063	9.89667	1011
RBL1	uc002xgj.1	chr20:35724410	-	chr20:35724331-35724610	15.7775	1111			G1/S	TTTGAG_0.973_+_-74	TTTGAG_0.973_+_-74	TTGGCGC_0.999_+_-6 TTCGCGC_0.999_+_-16					G1/S		TTTGAG_0.973_+_-74
RBM14	uc009yrk.3	chr11:66384052	+	chr11:66383852-66384191	6.73667	1011
RBM15	uc001dzl.1	chr1:110881944	+	chr1:110881744-110882027	15.48	1111			M/G1				TAACGG_1.000_-_-77 TAACGG_1.000_-_-175					M/G1		CGCGGG_1.000_+_16_TGTAAA_0.999_+_26 CGCGGG_1.000_+_16_TTTACA_0.999_-_26
RBMX	uc004fad.1	chrX:135962939	-	chrX:135962739-135963139	9.51333	1011	1			TTTGAA_0.974_-_-29	TTTGTA_0.188_+_-180 TTTGAA_0.974_-_-29 CTTGAA_0.475_+_159	TTCCCGG_1.000_+_14 TTCGCCC_1.000_+_48							TTAGAA_0.998_-_-23 TTTGAA_0.974_-_-29	TCCCGG_1.000_+_15_TATAAA_1.000_+_25 TCCCGG_1.000_+_15_TTTATA_1.000_-_25
RCL1	uc003zis.2	chr9:4792833	+	chr9:4792633-4793033	6.42333	1011													TTGGAA_1.000_-_107 TTTGGA_1.000_-_108
RDM1	uc002hkh.3	chr17:34257780	-	chr17:34257731-34257980	13.12	1111						TTGCGCC_0.972_-_-1
RDX	uc001pku.3	chr11:110167437	-	chr11:110167237-110167637	10.4367	1011						TTCCCGC_0.998_+_73
RECQL	uc001rey.3	chr12:21654603	-	chr12:21654403-21654803	16.245	1111						TTCCGGG_0.923_-_24 TTCCCGC_0.977_-_54		AAACA_1.000_+_-141
REEP4	uc011kyz.1	chr8:21999448	-	chr8:21999248-21999648	9.37	1111		1	G2/M	CTTGAA_1.000_-_45	CTTGAA_1.000_-_45					M/G1		G2/M	TTTCAA_1.000_+_44 CTTGAA_1.000_-_45
RFC3	uc001uuz.3	chr13:34392205	+	chr13:34392005-34392315	18.57	1111			G1/S								G1/S
RFC4	uc011bsd.2	chr3:186524290	-	chr3:186524090-186524490	8.35	1011			S-phase			TTCCCGC_0.982_-_40			S-phase	G1/S	G1/S	G1/S
RFC5	uc001twq.3	chr12:118454505	+	chr12:118454305-118454632	11.1625	1111			M/G1			TTGCGCG_0.942_+_14					M/G1
RFWD3	uc002fda.3	chr16:74700779	-	chr16:74700579-74700979	17.4	1111		1
RIF1	uc010fnv.2	chr2:152266396	+	chr2:152266196-152266596	7.01333	1011				TTCGAG_0.909_-_-34	TTCGAG_0.909_-_-34			AAACA_0.968_+_64
RMI1	uc004anq.4	chr9:86595636	+	chr9:86595436-86595836	7.02	1011			S-phase			TTCCCGC_0.997_-_64 TTCGCGC_1.000_+_-104		AAACA_0.999_+_-162	S-phase			G1/S
RMI2	uc002daw.1	chr16:11439310	+	chr16:11439110-11439328	11.14	1011			G1/S			TTGGCGG_0.992_+_-26						G1/S
RNASEH2A	uc002mvg.1	chr19:12917427	+	chr19:12917227-12917487	8.83667	1011			M/G1								M/G1
RNF121	uc001ora.3	chr11:71639767	+	chr11:71639567-71639967	10.49	1011					TAGGAA_0.341_-_-32	TTCCGGG_0.998_+_-68
RNF26	uc001pwh.3	chr11:119205209	+	chr11:119205009-119205409	12.1775	1111	1	1	G2/M	TTTGAA_0.974_-_-79	TTTGAA_0.974_-_-79					M/G1		G2/M	TTTGAA_0.974_-_-79
RNF5	uc003oaj.4	chr6:32146161	+	chr6:32145961-32146288	10.4	1011						TTGGGGC_1.000_+_65 TTCGCCC_0.901_-_109
RPA2	uc001bpe.1	chr1:28241236	-	chr1:28241036-28241436	10.3433	1011			S-phase			TTCCCGC_1.000_-_153 TTGGCGC_0.959_+_-170			S-phase		G1/S
RPL26	uc002glh.1	chr17:8286565	-	chr17:8286365-8286765	7.62333	1011					TTTGAG_0.102_-_-34
RPL27	uc002icj.3	chr17:41150445	+	chr17:41150245-41150645	6.94667	1011					TTCGAA_0.845_+_-154	TTCCGCC_0.981_+_-108
RPL38	uc002jjy.1	chr17:72199794	+	chr17:72199594-72199994	7.07	1011						TTCCGGG_0.917_-_2
RPL4	uc002apv.3	chr15:66797193	-	chr15:66797128-66797393	12.4225	1111
RPS13	uc001mmp.3	chr11:17099220	-	chr11:17099188-17099412	14.47	1011
RPS20	uc003xsn.2	chr8:56987140	-	chr8:56986942-56987340	7.86333	1011						TTCCGGG_0.997_+_9 TTGCGCG_0.982_-_185
RQCD1	uc002vih.1	chr2:219433677	+	chr2:219433477-219433677	8.58	1111						TTCCCGC_0.995_-_-180								GCGGCG_0.999_+_-17_TGTGAG_1.000_-_-7
RRM1	uc010qyc.2	chr11:4115923	+	chr11:4115723-4116123	13.2925	1111			S-phase			TTCCCGC_0.998_-_132			S-phase		G2/M
RRM2	uc021vdr.1	chr2:10262694	+	chr2:10262494-10262745	14.1425	1111		1	S-phase						S-phase		G2/M	S
RTEL1	uc011abd.2	chr20:62289162	+	chr20:62288962-62289362	9.43667	1011
RTKN2	uc001jlw.3	chr10:64028466	-	chr10:64028369-64028666	11.695	1111			G1/S	TTTGAA_1.000_-_43	TTTGAA_1.000_-_43					G1/S		G2	TTTCAA_1.000_+_42 TTTGAA_1.000_-_43
RTTN	uc002lkp.2	chr18:67872962	-	chr18:67872894-67873162	16.09	1111														GGCGCG_0.993_+_21_ATTAAA_0.999_-_31 GGCGCG_0.993_+_21_TTTAAT_0.999_+_31 TGGCGC_0.962_+_20_GTTTAA_0.993_+_30
SAE1	uc010ekx.3	chr19:47634079	+	chr19:47633879-47634187	23.46	1111
SASS6	uc001dsu.3	chr1:100598511	-	chr1:100598370-100598711	17.17	1111				TTTGAG_0.996_-_47	TTTGAG_0.996_-_47	TTGGCGC_1.000_-_39		AAACA_0.997_+_-131					TTTGAG_0.996_-_47
SCLT1	uc003igr.2	chr4:130014764	-	chr4:130014564-130014964	11.945	1111		1	G2/M	TTTGAA_1.000_-_43	TTTGAA_1.000_-_43							G2/M	TTTCAA_1.000_+_42 TTTGAA_1.000_-_43
SEC22C	uc010hic.3	chr3:42623520	-	chr3:42623320-42623720	7.14333	1011
SETD8	uc001uew.3	chr12:123868703	+	chr12:123868503-123868745	12.08	1111			G2/M	TTCGAA_1.000_+_-7	TTCGAA_1.000_+_-7	TTCCCGG_0.999_+_7	CAACTG_1.000_-_-33 TAACTG_0.938_-_-180		G2/M				TTCGAA_1.000_+_-7 TTCGAA_1.000_-_-7 TTTGCA_0.984_+_-184
SFPQ	uc001bys.3	chr1:35658743	-	chr1:35658650-35658943	10.9933	1011	1	1	G2/M		TAGGAA_0.173_+_-138				G2/M	M/G1	G2/M	G2/M
SFR1	uc001kxu.3	chr10:105881928	+	chr10:105881728-105881941	8.27	1011
SGOL1	uc021wty.1	chr3:20227698	-	chr3:20227498-20227898	24.5775	1111		1	G2/M	TTCGAA_0.994_+_-4	TTCGAA_0.994_+_-4					G2/M		G2	TTCGAA_0.994_+_-4 TTCGAA_0.994_-_-4
SGOL2	uc002uvv.4	chr2:201390864	+	chr2:201390664-201391064	12.8	1111	1		G2/M	TTTAAA_0.988_+_36	TTTAAA_0.988_+_36 TAGGAA_0.864_-_-42	TTGGCGG_0.991_-_18	CAACGG_0.994_+_22		G2/M	M/G1		G2/M	TTTAAA_0.988_+_36 TTTAAA_0.988_-_36
SHCBP1	uc002eec.4	chr16:46655311	-	chr16:46655271-46655511	14.2575	1111			G2/M	TTTGAA_1.000_+_33	TTTGAT_0.441_-_-24 TTTGAA_1.000_+_33	TTCCGCG_0.996_-_25			G2/M		G2/M	G2/M	TTTGAA_1.000_+_33	TCCGCG_0.937_+_23_TTCAAA_1.000_-_33
SHFM1	uc010lfn.1	chr7:96339203	-	chr7:96339075-96339403	11.6133	1011
SHQ1	uc010hod.3	chr3:72897598	-	chr3:72897491-72897798	11.4667	1011
SKA1	uc002let.3	chr18:47901391	+	chr18:47901191-47901591	14.33	1011			G2/M	TTTGAA_0.999_+_59	TTTGAA_0.999_+_59					G2/M			TTTGAA_0.999_+_59
SKA2	uc010dde.1	chr17:57232800	-	chr17:57232600-57233000	17.005	1111	1	1	G2									G2	TATGAA_0.950_+_-154
SKA3	uc001unv.3	chr13:21750741	-	chr13:21750616-21750941	17.2475	1111			G2		TTTGAA_0.229_-_46							G2
SLBP	uc003gdi.1	chr4:1714030	-	chr4:1713915-1714230	8.02667	1011			G1/S			TTGGGGG_0.999_+_-34			G1/S	G1/S	G1/S	G1/S
SLC25A14	uc004evp.1	chrX:129474046	+	chrX:129473846-129474246	8.20333	1011				TTCGAT_1.000_+_85	TTCGAT_1.000_+_85	TTCCCGG_0.998_+_-16 TTCCGGG_1.000_+_-170	TAACGG_1.000_+_4						ATTGAA_1.000_+_89	GGCCGC_1.000_+_120_CCTGAA_1.000_-_130
SLC25A40	uc003uje.3	chr7:87505692	-	chr7:87505492-87505892	7.76	1011			G1/S	TTTGAA_1.000_+_-119	TTTGAA_1.000_+_-119							G1/S	TTTCAA_1.000_-_-118 TTTGAA_1.000_+_-119 GTTGAA_0.999_+_-127
SLC35E3	uc001suh.3	chr12:69139935	+	chr12:69139735-69140135	19.2133	1011			S-phase									S
SLC3A2	uc001nwf.3	chr11:62623483	+	chr11:62623283-62623683	15.1467	1011						TTCGCGC_0.901_-_47		AAATA_0.980_+_-100
SLX1B	uc002dsy.3	chr16:29465821	+	chr16:29465772-29466021	13.4375	1111
SLX1B	uc002dxg.3	chr16:30205163	+	chr16:30205114-30205363	13.6175	1111
SMC1A	uc004dsg.3	chrX:53449618	-	chrX:53449549-53449818	14.4767	1011						TTCCCGC_0.999_+_-5
SMC2	uc004bbu.1	chr9:106856540	+	chr9:106856340-106856740	11.0925	1111				TTTGAA_1.000_-_47	TTTGAA_1.000_-_47	TTCGGCG_1.000_-_39		AAATA_0.999_+_58					TTTGAA_1.000_-_47	CGCGCC_1.000_+_37_TTCAAA_1.000_+_47 TCGCGC_1.000_+_36_ATTCAA_1.000_+_46
SMC3	uc001kze.3	chr10:112327448	+	chr10:112327248-112327574	11.2533	1011								AAACA_1.000_-_4
SMC4	uc003fdg.1	chr3:160117429	+	chr3:160117229-160117629	19.3875	1111	1		G2	TTTGTA_1.000_+_-8 TTCGAG_1.000_+_12 TTCGAG_1.000_+_-14 TTTGTA_1.000_+_-31 TTTGAA_0.906_-_-66	TTTGTA_1.000_+_-31 TTTGAA_0.906_-_-66 TTTGTA_1.000_+_-8 TTCGAG_1.000_+_12 TTCGAG_1.000_+_-14	TTGCGCG_1.000_+_-40		AAATA_1.000_-_-4 AAACA_0.994_+_35	G2			G2/M	TTTGTA_1.000_+_-8 TTTGTA_1.000_+_-31 TTTGAA_0.906_-_-66 TTTCAA_0.927_+_-67
SMC6	uc002rcq.2	chr2:17935096	-	chr2:17934896-17935296	15.5575	1111
SNIP1	uc001cbi.3	chr1:38019903	-	chr1:38019830-38020103	12.0067	1011		1			CTTGAA_0.119_+_-123
SNRNP40	uc010oge.2	chr1:31769644	-	chr1:31769598-31769844	9.37667	1011
SNRPA	uc002ooz.3	chr19:41256758	+	chr19:41256558-41256958	12.7775	1111				TTTGAT_0.947_+_-93	TTTGAT_0.947_+_-93	TTCCCGC_0.968_-_-112							TTTGAT_0.947_+_-93
SNRPB	uc002wfz.1	chr20:2451499	-	chr20:2451336-2451699	10.5825	1111						TTCCCGC_0.968_-_81
SNRPD2	uc002pcw.3	chr19:46195443	-	chr19:46195243-46195643	20.65	1111													TTGGAA_0.959_+_-35 TTTGGA_0.968_+_-36
SNRPE	uc001hai.3	chr1:203830739	+	chr1:203830539-203830787	9.26	1011
SNRPG	uc002sgp.3	chr2:70520869	-	chr2:70520781-70521069	9.05667	1011
SOCS4	uc001xbp.3	chr14:55493843	+	chr14:55493643-55494043	8.1175	1111						TTCCCGC_1.000_+_-54
SP4	uc003sva.3	chr7:21467688	+	chr7:21467488-21467869	9.20667	1011						TTCGCGG_1.000_+_31 TTCCCCC_1.000_-_-167 TTGGCCG_1.000_-_-180								CGCCGC_1.000_+_-50_ATTGAC_1.000_-_-40 GCGCCG_1.000_+_-51_TGTCAA_1.000_+_-41
SPAG5	uc002hbq.3	chr17:26926056	-	chr17:26925964-26926256	13.8225	1111	1	1	G2/M	TTTGAA_0.994_-_15	TTTGAA_0.994_-_15			AAACA_0.946_+_18	G2/M		G2/M	G2/M	TTTGAA_0.994_-_15
SPATA5	uc003iey.3	chr4:123844224	+	chr4:123844024-123844297	11.5775	1111						TTCCGGG_0.999_-_-4
SPC24	uc002mql.2	chr19:11266484	-	chr19:11266452-11266684	9.93333	1011						TTGCGCG_0.994_+_4
SPC25	uc002uel.3	chr2:169746944	-	chr2:169746744-169747144	24.135	1111	1	1	G2	TTTGAA_0.988_+_0	TTTGAA_0.988_+_0							G2	TTTGAA_0.988_+_0 TTTCAA_0.959_-_1
SPICE1	uc003eag.4	chr3:113234034	-	chr3:113233834-113234234	7.24	1011						TTCCGGG_0.968_-_8
SPRY4	uc003lml.2	chr5:141704620	-	chr5:141704420-141704820	12.25	1111			G2	TTTGTA_1.000_+_-186	TTTGTA_1.000_+_-186	TTCCCGC_1.000_+_-120				G2			TATGAA_1.000_-_0 TATGAA_1.000_-_-52 TATGAA_1.000_-_-107 TTTGTA_1.000_+_-186	CCCCCC_1.000_+_-114_TTTTAT_0.998_-_-104
SRBD1	uc002rus.3	chr2:45838433	-	chr2:45838233-45838633	8.00333	1011				TTTGAA_0.997_+_-5	TTTGAA_0.997_+_-5	TTCCGGC_1.000_+_5 TTCCCGC_0.911_-_67							TTTCAA_0.999_-_-4 TTTGAA_0.997_+_-5
SRP9	uc001hpg.3	chr1:225965514	+	chr1:225965314-225965642	7.38	1011
SRPR	uc010sbm.2	chr11:126138877	-	chr11:126138699-126139077	10.55	1111						TTCCGGG_1.000_+_70 TTGGCGC_0.999_+_102 TTCCCGG_0.999_+_139
SRSF1	uc002ivj.3	chr17:56084707	-	chr17:56084507-56084907	14.105	1111			G2/M				CAACGG_0.997_-_-3					G2/M	TTTGGA_1.000_+_104
SRSF11	uc010oqo.1	chr1:70671364	+	chr1:70671223-70671564	7.23	1011					TTTGAA_0.434_-_-139
SRSF2	uc002jsy.4	chr17:74733493	-	chr17:74733293-74733693	9.38333	1011			G2/M			TTCCGGG_1.000_+_11 TTCGCGG_0.999_+_-157	CAACTG_0.996_+_-144					G2/M	TTGGAA_1.000_-_-147	CGGGCG_1.000_+_23_TTTGTG_0.974_+_33 TCGCGG_1.000_+_-156_GTTGGA_1.000_-_-146
SRSF6	uc010zwg.2	chr20:42086503	+	chr20:42086303-42086673	9.905	1111
STARD3NL	uc003tfr.3	chr7:38217807	+	chr7:38217607-38218007	13.51	1011
STIL	uc001crg.1	chr1:47779819	-	chr1:47779619-47780019	26.315	1111	1		G2			TTCCCGC_0.989_+_1 TTGCCGC_0.996_+_-11			G2	G2/M
STK35	uc002wfw.4	chr20:2082527	+	chr20:2082327-2082527	12.4375	1111						TTCGCGC_0.992_+_-141
SUCLG1	uc010ysk.1	chr2:84686586	-	chr2:84686393-84686786	16.3	1111
SUPT16H	uc001waq.2	chr14:21852425	-	chr14:21852225-21852625	7.91333	1011			G1/S			TTCGCGG_1.000_-_57					G1/S
SUPT4H1	uc002iwe.1	chr17:56429563	-	chr17:56429496-56429763	9.96667	1011								AAATA_0.991_-_-1
SUZ12	uc002hgs.2	chr17:30264043	+	chr17:30263843-30264243	8.25	1011				TTTGAA_1.000_-_-190	TTTGAA_1.000_-_-190	TTCCCCC_1.000_-_-30 TTGGCCG_0.997_-_-51 TTGGCCC_1.000_-_-91 TTCCCCC_1.000_-_-103 TTCCCCC_1.000_+_112 TTGGCCC_1.000_-_-151	CAACGG_1.000_+_-87						TTTGAA_1.000_-_-190	CCGCCG_0.998_+_-55_TCTGAT_1.000_-_-45
SYNGR4	uc002piz.3	chr19:48867650	+	chr19:48867450-48867850	18.8775	1111						TTCCCGC_1.000_-_-55	CAACGG_1.000_+_-177
TAF11	uc011dsr.1	chr6:34855819	-	chr6:34855734-34856019	9.36	1011
TAF1A	uc009xdz.2	chr1:222763275	-	chr1:222763075-222763475	7.56	1011			G2									G2
TCERG1	uc011dbt.2	chr5:145826872	+	chr5:145826672-145826912	12	1111			M/G1	TTTGAA_1.000_-_-145	TTTGAA_1.000_-_-145				M/G1				TTTGAA_1.000_-_-145 TTTCAA_1.000_+_-146 TATGAA_0.999_-_-156	TCGGCG_0.997_+_11_GATGAA_1.000_+_21
TCF19	uc003nst.3	chr6:31126302	+	chr6:31126102-31126502	11.9675	1111			G1/S			TTCCCGG_0.999_-_9 TTCCCGG_1.000_-_-130 TTGCCGC_0.993_-_-138				G1/S		G1/S	TTTGAC_0.996_-_84
TCP1	uc003qsr.3	chr6:160210735	-	chr6:160210535-160210935	11.24	1011
TERF1	uc003xze.2	chr8:73921096	+	chr8:73920896-73921121	11.22	1111
TEX14	uc010dda.2	chr17:56769416	-	chr17:56769216-56769616	9.84333	1011						TTCCCGC_0.989_+_-53
THAP10	uc002asv.3	chr15:71184772	-	chr15:71184611-71184972	12.1425	1111			G1/S	TTTGTA_0.945_+_-95	TTTGTA_0.945_+_-95	TTCGCGC_1.000_-_-103				G1/S			TTTGTA_0.945_+_-95
THAP8	uc002oda.1	chr19:36545664	-	chr19:36545464-36545864	18.4975	1111			G1/S			TTCCCGC_1.000_-_-127	TAACGG_0.933_-_-189					G1/S
TIAL1	uc001lek.1	chr10:121356541	-	chr10:121356341-121356741	11.0967	1011
TIMELESS	uc001slf.2	chr12:56843200	-	chr12:56843000-56843400	9.46	1011			G2/M			TTCCGCC_0.998_-_34					G2/M
TIMM23	uc001jin.3	chr10:51371394	+	chr10:51371194-51371540	7.97333	1011						TTCCGGG_0.998_-_19 TTCCGGG_0.928_+_-36
TIMM23	uc001jiu.3	chr10:51623336	-	chr10:51623214-51623536	7.4	1011					TTTGAT_0.151_+_-122	TTCCGGG_1.000_-_-7 TTGCGGC_0.974_-_-46 TTCCGGG_0.907_+_-62							TGTGAA_0.991_+_8
TIMM8A	uc011mri.2	chrX:100603957	-	chrX:100603757-100604157	14.0067	1011
TIPIN	uc010ujo.1	chr15:66649054	-	chr15:66648854-66649254	11.6533	1011			G1/S			TTGGCGC_0.956_+_-35			G1/S			G1/S
TK1	uc002juw.2	chr17:76183285	-	chr17:76183085-76183451	16.1975	1111
TMED5	uc001dpo.3	chr1:93646246	-	chr1:93646046-93646446	13.3333	1011				TTCGAA_0.985_+_-43	TTCGAA_0.985_+_-43 TAGGAA_0.289_+_-130		CAACGG_0.987_-_-25						TTCGAA_0.985_+_-43 TTCGAA_0.985_-_-43
TMEM111	uc003bun.3	chr3:10028522	-	chr3:10028345-10028722	11.3725	1111						TTCCCGC_0.984_+_-75
TMEM126B	uc001pan.2	chr11:85339621	+	chr11:85339421-85339651	10.2867	1011													TTTGAC_1.000_+_-90
TMEM143	uc010xzp.1	chr19:48867186	-	chr19:48867177-48867386	18.8775	1111			G1/S							G1/S
TMEM167A	uc003khx.4	chr5:82373272	-	chr5:82373142-82373472	19.16	1111						TTCCGCC_0.990_+_77 TTCCGGG_0.991_-_89
TMEM194A	uc010sra.2	chr12:57472574	-	chr12:57472528-57472774	15.3325	1111						TTCCCGC_0.961_+_-144	CAACTG_0.954_-_-127
TMEM48	uc010onv.2	chr1:54304225	-	chr1:54304025-54304425	18.0525	1111			G2/M		TTCGAA_0.788_+_27 TTTGAG_0.292_+_182						G2/M	G2
TMEM55B	uc001vxl.2	chr14:20929637	-	chr14:20929484-20929837	11.725	1111							CAACTG_0.940_-_-146						TTTGCA_0.905_+_-181
TMEM97	uc002hat.3	chr17:26646120	+	chr17:26645920-26646265	7.96333	1011
TMPO	uc001tfj.3	chr12:98909350	+	chr12:98909150-98909550	12.3225	1111			G2/M	TTTAAA_1.000_+_-113	TTTAAA_1.000_+_-113	TTGGGGC_1.000_+_5 TTCGCCC_0.981_-_14					G2/M	G2	TTTAAA_1.000_+_-113 TTTAAA_1.000_-_-113 TTTTAA_1.000_+_-114	GCGGCG_0.951_+_-80_ATGGAA_1.000_+_-70
TNKS	uc011kwv.1	chr8:9413444	+	chr8:9413244-9413449	12.83	1111						TTGCCGC_1.000_+_-27	CAACGG_1.000_-_-30
TOE1	uc010olm.2	chr1:45805341	+	chr1:45805141-45805541	9.77333	1011
TOP1	uc002xjl.3	chr20:39657461	+	chr20:39657261-39657661	9.42	1011			G2/M	TTTAAA_0.987_+_-30	TTTAAA_0.987_+_-30	TTCCGCG_0.989_+_-61	CAACTG_1.000_+_25		M/G1			G2/M	TTTTAA_0.999_-_-29 TTTAAA_0.987_+_-30 TTTAAA_0.987_-_-30 TTTGCA_0.999_-_-165
TOP2A	uc002huq.3	chr17:38574202	-	chr17:38574043-38574402	16.6675	1111	1	1	G2		CTTGAA_0.359_-_35 TTTGAA_0.103_-_-98	TTCGGGC_0.953_+_14			G2	G2/M	G2/M	G2
TPD52L2	uc021wgg.1	chr20:62496580	+	chr20:62496380-62496718	8.56667	1011
TPRKB	uc010yrm.1	chr2:73964517	-	chr2:73964317-73964717	9.66333	1011
TPX2	uc002wwp.1	chr20:30326903	+	chr20:30326703-30327103	19.6075	1111	1	1	G2/M	TTTGTA_0.986_+_-30 TTTGAA_1.000_-_170	TTTGTA_0.986_+_-30 TTTGAA_1.000_-_170				G2/M	M/G1	G2/M	G2/M	TTTGTA_0.986_+_-30 TTTGAA_1.000_-_170 TTTCAA_1.000_+_177 GTTGAA_0.999_-_178
TRAIP	uc003cxs.1	chr3:49893992	-	chr3:49893886-49894192	15.2	1111			G2	TTTGAA_0.985_+_15	TTTGAA_0.985_+_15				G2				TTTGAA_0.985_+_15
TRAPPC6A	uc002pav.3	chr19:45681485	-	chr19:45681476-45681685	7.98333	1011
TRIM37	uc010woc.2	chr17:57184266	-	chr17:57184066-57184466	11.9167	1011						TTCCCGC_0.931_-_-49		AAACA_0.939_-_71
TRIP13	uc003jbr.3	chr5:892968	+	chr5:892772-893113	10.8967	1011			G2/M						G2/M		G2/M
TRMT6	uc002wmh.1	chr20:5931173	-	chr20:5931051-5931373	13.62	1111						TTGGCGC_0.998_+_-158
TROAP	uc009zlh.3	chr12:49716970	+	chr12:49716770-49717170	18.7525	1111		1	G2	TTTGTA_1.000_-_74	TTTGTA_1.000_-_74			AAATA_1.000_-_69	M/G1	G2/M	G2/M	G2	TTTGTA_1.000_-_74
TROVE2	uc001gss.3	chr1:193028551	+	chr1:193028390-193028666	7.66333	1011			G1/S		TTCGAT_0.342_-_39						G1/S
TSTD2	uc004axn.3	chr9:100395962	-	chr9:100395762-100396162	6.53	1011						TTCCGGG_0.908_+_93
TTC32	uc002rdg.3	chr2:20101744	-	chr2:20101615-20101944	10.56	1011
TTF2	uc001egx.1	chr1:117602948	+	chr1:117602748-117602968	19.1	1111		1	G2			TTCCGCC_0.991_-_-32			G2
TTI1	uc002xhm.3	chr20:36661833	-	chr20:36661633-36662033	9.83	1111						TTCCGGC_0.981_+_-24 TTCCCGC_0.999_+_-80 TTCCGGG_0.964_-_-144								TCCCGC_0.999_+_-79_TCGGAA_0.996_+_-69
TTK	uc003pjc.3	chr6:80714321	+	chr6:80714121-80714521	19.945	1111	1	1	G2/M	TTTGAA_1.000_-_43	TTTGAA_1.000_-_43	TTCCCCG_0.999_-_35			G2/M	G2/M	G2/M	G2	TTTGAA_1.000_-_43
UACA	uc010uke.2	chr15:71055850	-	chr15:71055746-71056050	8.55	1011			G2	TTTAAA_0.949_+_-160	TTTAAA_0.949_+_-160	TTCCCGC_0.973_+_-137			G2				TTTTAA_0.969_-_-159 TTTAAA_0.949_+_-160 TTTAAA_0.949_-_-160
UBE2C	uc002xpo.3	chr20:44441254	+	chr20:44441054-44441334	21.4875	1111	1	1	G2	TTTGAA_1.000_-_-2 TTTGAT_1.000_-_-52	TTTGAA_1.000_-_-2 TTTGAT_1.000_-_-52		CAACTG_0.974_-_30		G2	G2/M	G2/M	G2	TTTGAA_1.000_-_-2 TTTGAT_1.000_-_-52
UBE2CBP	uc003pjp.2	chr6:83775545	-	chr6:83775437-83775745	8.7	1011
UBE2S	uc002qkx.1	chr19:55919325	-	chr19:55919125-55919525	16.6175	1111	1	1	G2/M	TTTGAA_0.999_-_-134	TTTGAA_0.999_-_-134				M/G1	M/G1	G2/M	G2/M	TTTGAA_0.999_-_-134	GCGGCG_0.910_+_-145_ATTCAA_0.996_+_-135
UBE2T	uc001gxx.4	chr1:202311094	-	chr1:202310894-202311294	27.535	1111	1		S-phase		TTTGAA_0.212_+_-124				S-phase
UBP1	uc010hga.3	chr3:33481897	-	chr3:33481697-33482097	10.7067	1011						TTCCGCC_0.984_-_-4 TTGGCCG_0.998_+_72
UCHL5	uc010pox.2	chr1:193028523	-	chr1:193028390-193028666	7.66333	1011					TTCGAT_0.342_+_-73
UFD1L	uc002zpm.2	chr22:19466738	-	chr22:19466608-19466938	20.295	1111
UNG	uc001tnz.2	chr12:109535398	+	chr12:109535198-109535484	12.5367	1011			G1/S			TTGGCGC_0.929_+_-4			G1/S	G1/S	G1/S	G1/S
USP1	uc001daj.2	chr1:62901974	+	chr1:62901774-62902174	9.15333	1011			S-phase			TTGGCGC_0.995_-_118			S-phase		G1/S
USP37	uc010zkg.2	chr2:219433084	-	chr2:219432884-219433284	8.58	1111			G1/S			TTCCCGC_1.000_+_27		AAACA_1.000_-_8		G1/S		G1/S
USP5	uc001qrh.4	chr12:6961284	+	chr12:6961084-6961343	31.3833	1011							CAACTG_0.999_+_-71
USP51	uc004dun.2	chrX:55515631	-	chrX:55515431-55515831	12.3833	1011			S-phase		TTTAAA_0.772_+_-84							S
VPS26B	uc001qhe.3	chr11:134094560	+	chr11:134094360-134094760	10.8775	1111
VPS35	uc002eef.4	chr16:46723144	-	chr16:46723045-46723344	12.81	1111
VPS45	uc010pbq.2	chr1:150039341	+	chr1:150039141-150039541	10.0125	1111
WBP11	uc001rci.3	chr12:14956401	-	chr12:14956201-14956601	15.145	1111				CTTGAA_1.000_-_-5	CTTGAA_1.000_-_-5								CTTGAA_1.000_-_-5 TTTCAA_1.000_+_-6	GGGCGC_1.000_+_-16_TTGAAA_1.000_-_-6
WDHD1	uc001xbn.2	chr14:55493819	-	chr14:55493619-55494019	8.1175	1111			G1/S			TTCCCGC_1.000_-_23					G1/S	G1/S
WDPCP	uc002sch.3	chr2:63815867	-	chr2:63815667-63816067	9.36	1111		1
WDR62	uc002odd.2	chr19:36545782	+	chr19:36545582-36545873	18.4975	1111			G2			TTCCCGC_1.000_+_2	TAACGG_0.933_+_65		G2
WDR67	uc011lih.2	chr8:124084919	+	chr8:124084719-124085009	13.38	1011			G2		TTTGAG_0.741_-_-2	TTCCCGG_0.999_+_5 TTCCCGG_0.954_-_31					M/G1	G2
WDR92	uc002sef.1	chr2:68384656	-	chr2:68384575-68384856	13.045	1111
WEE1	uc001mhs.3	chr11:9595227	+	chr11:9595027-9595427	10.2133	1011	1	1	G2	TTTGAA_1.000_-_-79	TTTGAA_1.000_-_-79	TTCGGGC_0.958_-_-7 TTCCCGC_1.000_-_-22 TTCCCGC_0.988_+_-141	TAACGG_1.000_+_-30			G2	G2/M	G2	TTTGAA_1.000_-_-79 TTTCAA_1.000_+_-80
WHAMM	uc002bje.3	chr15:83477972	+	chr15:83477772-83478172	8.86667	1011
XPC	uc011ave.2	chr3:14220172	-	chr3:14220068-14220360	13.7525	1111				TTTGAA_1.000_-_-187	TTTGAA_1.000_-_-187	TTCCCGC_0.976_+_-170							TTTGAA_1.000_-_-187 TTTCAA_1.000_+_-188
XPO1	uc002sbk.3	chr2:61765418	-	chr2:61765218-61765618	9.97	1011			G1/S	TTTGAG_1.000_+_13	TTTGAG_1.000_+_13	TTCCCCC_0.933_-_171					G1/S		GTTGAA_1.000_-_-3 TTTCAA_1.000_+_-4 TTTGAG_1.000_+_13 TCTGAA_1.000_+_-14 TTTGGA_1.000_-_-70 TTGGAA_1.000_-_-71	GGCGCC_1.000_+_-56_GCTGAA_1.000_+_-46 GGCGGG_0.999_+_-195_TGTGGA_0.998_+_-185
XRCC2	uc003wld.3	chr7:152373250	-	chr7:152373164-152373450	12.96	1111			G1/S			TTCCCGC_0.973_-_44				G1/S
XRCC4	uc003kib.3	chr5:82373316	+	chr5:82373142-82373516	19.16	1111			G2/M			TTCCGCC_0.990_-_-128 TTCCGGG_0.991_+_-140					G2/M
YEATS4	uc001sux.3	chr12:69753531	+	chr12:69753331-69753731	14.7225	1111			G1/S								G1/S	G1/S
YME1L1	uc010qdl.2	chr10:27443349	-	chr10:27443149-27443549	23.5833	1011						TTCCGGG_1.000_-_-10 TTCCGGG_0.995_+_21
ZC3H10	uc001sjp.1	chr12:56512029	+	chr12:56511829-56512229	11.4267	1011						TTCCGGG_0.986_+_-50
ZCCHC17	uc001bsp.1	chr1:31769841	+	chr1:31769641-31770041	9.37667	1011
ZFPL1	uc001ocq.1	chr11:64851693	+	chr11:64851493-64851893	19.425	1111					TTCGAA_0.867_+_-160	TTCCGGG_1.000_-_-5
ZFYVE20	uc011avn.1	chr3:15140655	-	chr3:15140455-15140855	9.22667	1011					TTCGAG_0.186_-_-75
ZNF132	uc002qst.4	chr19:58951589	-	chr19:58951389-58951789	6.98667	1011
ZNF180	uc010ejm.3	chr19:45004574	-	chr19:45004374-45004774	7.775	1111						TTCCGGG_1.000_+_-15
ZNF266	uc002mlo.3	chr19:9546234	-	chr19:9546034-9546434	9.97	1011
ZNF300	uc021yfx.1	chr5:150284545	-	chr5:150284345-150284745	12.51	1111
ZNF367	uc004awf.3	chr9:99180669	-	chr9:99180469-99180869	9.03	1011			G1/S			TTCCCGC_1.000_-_-5 TTCGCGC_1.000_-_-19 TTCCGCC_1.000_+_-29 TTGGGGG_0.991_+_39		AAATA_1.000_-_34		G1/S
ZNF45	uc002oxw.2	chr19:44439411	-	chr19:44439211-44439611	8.14	1011
ZNF473	uc002prm.3	chr19:50529211	+	chr19:50529011-50529411	12.54	1011
ZNF530	uc002qpk.2	chr19:58111252	+	chr19:58111052-58111452	9.49333	1011
ZNF551	uc002qpv.4	chr19:58193356	+	chr19:58193156-58193556	10.18	1011
ZNF653	uc002mrz.2	chr19:11616738	-	chr19:11616601-11616938	6.83	1011						TTGGCGC_0.926_+_21	CAACGG_1.000_+_103
ZNF684	uc001cft.2	chr1:40997232	+	chr1:40997032-40997432	13.8725	1111			G2									G2
ZNF687	uc009wmo.3	chr1:151254790	+	chr1:151254590-151254990	14.27	1011						TTCGGCC_0.998_-_-34		AAATA_0.958_+_140
ZNF688	uc002dyt.2	chr16:30583728	-	chr16:30583596-30583928	22.2325	1111
ZNF689	uc002dyx.3	chr16:30621682	-	chr16:30621482-30621882	13.68	1111				TAGGAA_0.999_+_-3 TTTGAA_1.000_-_-143	TAGGAA_0.999_+_-3 TTTGAA_1.000_-_-143	TTCCCCG_0.999_+_90							TTTGAA_1.000_-_-143	TGGCGC_0.999_+_10_ATTGAC_1.000_-_20
ZNF701	uc021uyw.1	chr19:53073916	+	chr19:53073716-53074116	11.8767	1011
ZNF785	uc002dyv.2	chr16:30597092	-	chr16:30596932-30597292	14.6425	1111	1	1			TTTGAA_0.893_-_-143
ZNF789	uc010lfw.1	chr7:99070514	+	chr7:99070314-99070714	8.45333	1011
ZNF850	uc010efc.3	chr19:37263716	-	chr19:37263516-37263916	10.345	1111			G2/M									G2/M
ZRANB3	uc002tum.3	chr2:136288806	-	chr2:136288606-136289006	13.0133	1011			G2	CTTGAA_1.000_+_-22	CTTGAA_1.000_+_-22							G2	CTTGAA_1.000_+_-22
ZWILCH	uc002aqa.3	chr15:66797430	+	chr15:66797230-66797630	12.6875	1111			G2/M					AAATA_0.993_+_149			G2/M
ZWINT	uc001jjx.1	chr10:58121034	-	chr10:58120997-58121234	23.2	1111			S-phase		TTTGAA_0.125_-_-18				S-phase

## Sheet: Muller 2014, CDE-CHR
Genes with CDE-CHR tandem elements (CDE 4bp upstream of CHR) in the set of D+LCC
Genes	Transcript ID	TSS	Strand	Promoter-Region	CDE-CHR tandem
AKIRIN2	uc003pmk.3	chr6:88411985	-	chr6:88411785-88412185	GGCCGC_1.000_+_-30_TTTGAA_1.000_+_-20
AURKB	uc002gkm.3	chr17:8113883	-	chr17:8113683-8114083	GGGCGG_0.717_+_-60_TTTGAA_0.999_+_-50
BUB1	uc010fkb.3	chr2:111435684	-	chr2:111435572-111435884	GCGCGG_0.907_+_34_TTCGAA_0.994_+_44
CCNA2	uc003iec.4	chr4:122745088	-	chr4:122744888-122745288	TCGCGG_1.000_+_11_CTTGAA_1.000_+_21
CDC25C	uc003lcp.1	chr5:137667516	-	chr5:137667316-137667716	TGGCGG_0.700_+_-18_TTTGAA_0.990_+_-8
CDCA3	uc001qre.2	chr12:6960456	-	chr12:6960256-6960656	TGGCGG_1.000_+_-8_TTTGAA_1.000_+_2
CDK1	uc021prh.1	chr10:62538211	+	chr10:62538011-62538411	GCGCGG_0.999_+_2_TTTGAA_1.000_+_12
CKS1B	uc001fgb.3	chr1:154947117	+	chr1:154946917-154947221	GGGCGG_0.990_+_0_TTTGAA_1.000_+_10
ESCO2	uc003xgg.3	chr8:27632057	+	chr8:27631857-27632257	CGCGCG_0.790_+_-5_TTTGAA_0.967_+_5
ESPL1	uc001sck.2	chr12:53662082	+	chr12:53661882-53662282	GCCGCG_0.000_+_-40_TTTGAA_0.999_+_-30
FAM110A	uc002wef.1	chr20:814355	+	chr20:814155-814555	CGGCGC_0.795_+_-80_TTCGAA_1.000_+_-70
FOXM1	uc009zea.3	chr12:2986321	-	chr12:2986121-2986521	CGGCGC_1.000_+_-10_TTTGAA_1.000_-_0
GTSE1	uc011aqy.2	chr22:46692637	+	chr22:46692437-46692837	CGGCGC_0.153_+_136_TTTAAA_0.947_+_146
IQGAP3	uc001fpf.3	chr1:156542396	-	chr1:156542321-156542596	CGGCGG_1.000_+_40_TTTGAA_1.000_-_50 GGCCGG_0.313_+_-49_TTTGTA_0.998_-_-39
KIAA1731	uc009ywb.1	chr11:93394815	+	chr11:93394615-93395015	TGGCGG_1.000_+_-25_TTTGAA_1.000_+_-15
KIF14	uc010ppk.1	chr1:200589862	-	chr1:200589662-200590062	GGGGCG_0.999_+_-27_TTTGAA_0.996_-_-17
KIF20B	uc001kgr.1	chr10:91461366	+	chr10:91461166-91461566	GCCGCC_0.977_+_-5_TTTGAA_1.000_+_5
KIF2C	uc010olb.2	chr1:45205489	+	chr1:45205289-45205604	GCGCGC_0.995_+_7_TTTAAA_1.000_+_17
MELK	uc010mlm.3	chr9:36572904	+	chr9:36572704-36573104	GCCCGG_0.999_+_-51_TTTGAT_0.997_+_-41
MIS18BP1	uc001wwf.3	chr14:45722605	-	chr14:45722405-45722805	GGGCGG_0.958_+_162_TTTGAA_0.964_-_172
MND1	uc003ink.2	chr4:154265800	+	chr4:154265600-154265889	CGGCGC_0.692_+_4_TTTGAT_0.978_-_14
NEIL3	uc010irs.3	chr4:178230990	+	chr4:178230790-178231107	GCGCGC_0.981_+_4_TTTGAA_0.959_+_14
RAD18	uc003brd.3	chr3:9005159	-	chr3:9005069-9005359	CGCGGG_1.000_+_14_TTCGAG_0.999_+_24
RAD54L	uc001cpl.2	chr1:46713366	+	chr1:46713166-46713566	CGGCGG_0.962_+_16_TTCGAT_1.000_+_26
RANGAP1	uc003azu.3	chr22:41682216	-	chr22:41682016-41682416	CGGCCG_0.003_+_-53_TTCGAG_0.991_-_-43
RNF26	uc001pwh.3	chr11:119205209	+	chr11:119205009-119205409	TCGGGC_0.588_+_-89_TTTGAA_0.974_-_-79
SHCBP1	uc002eec.4	chr16:46655311	-	chr16:46655271-46655511	TCCGCG_0.937_+_23_TTTGAA_1.000_+_33
SKA1	uc002let.3	chr18:47901391	+	chr18:47901191-47901591	CGGCGG_0.607_+_49_TTTGAA_0.999_+_59
