# Supplementary material for: Characterization of the mechanism by which the RB/E2F pathway controls expression of the cancer genomic DNA deaminase APOBEC3B
Source: eLife. 2020 Sep 28;9:e61287. doi: 10.7554/eLife.61287 (PMC7553775; doi:10.7554/eLife.61287)
Supplement: Supplementary file 2. [file elife-61287-supp2.xlsx]

## Sheet: README
Performed by the lab of Dennis Kappei
DREAM component
PRC1.6 component
RB/E2F repressive copmplex
	log2 is higher than 2 (forward) or lower than 2 (reverse)
SEQUENCES
Wild type	CACAGAGCTTCAAAAAAAGAGCGGGACAGGGACAAGCGTATCTAAGAGGC
Wild type vs. +22C-to-G	CACAGAGCTTCAAAAAAAGAGGGGGACAGGGACAAGCGTATCTAAGAGGC
Wild type vs. mutant (+12/20)	CACAGAGCTTCTACATAGGTGCGGGACAGGGACAAGCGTATCTAAGAGGC
Wild type vs. mutant (+22/30)	CACAGAGCTTCAAAAAAAGAGAGAGGCGGCGACAAGCGTATCTAAGAGGC

## Sheet: Log2 transformed SILAC values 
Wild type vs. +22C-to-G					Wild type vs. mutant (+12/20)					Wild type vs. mutant 2 (+22/30)
Protein names	Gene names	log2 H/L forward	log2 H/L reverse		Protein names	Gene names	log2 H/L forward	log2 H/L reverse		Protein names	Gene names	log2 H/L forward	log2 H/L reverse
Zinc finger and BTB domain-containing protein 2	ZBTB2	5.12528	-4.87358		Retinoblastoma-associated protein	RB1	5.89307	-3.71736		Retinoblastoma-associated protein	RB1	8.09924	-3.83226
Retinoblastoma-associated protein	RB1	4.00531	-4.91441		Transcription factor E2F4	E2F4	5.66806	-3.80737		Transcription factor E2F3	E2F3	5.13035	-4.58738
Transcription factor E2F3	E2F3	3.98286	-5.07651		Retinoblastoma-like protein 1	RBL1	5.13517	-0.119072		Zinc finger and BTB domain-containing protein 2	ZBTB2	4.39218	-5.30364
Transcription factor Dp-1	TFDP1	3.58484	-4.87514		Transcription factor E2F3	E2F3	4.86686	-5.57168		Transcription factor Dp-2	TFDP2	4.1823	-3.06915
Transcription factor Dp-2	TFDP2	3.50932	-4.7026		Transcription factor E2F6	E2F6	4.49435	-3.15162		Protein lin-52 homolog	LIN52	4.0173	-4.53126
Transcription factor E2F6	E2F6	3.29888	-2.5826		Protein lin-9 homolog	LIN9	4.48311	-3.14509		Transcription factor E2F1	E2F1	3.9875	-1.89647
Antigen KI-67	MKI67	3.17757	1.76926		Transcription factor E2F1	E2F1	4.43536	-3.00023		Transcription factor Dp-1	TFDP1	3.95689	-4.3955
	MGA	3.08914	-1.68071			MGA	4.2426	-1.87334		Retinoblastoma-like protein 1	RBL1	3.83653	-4.11859
Atherin	SAMD1	3.07238	-2.10141		Zinc finger protein 362	ZNF362	3.93216	-2.7336		Protein lin-54 homolog	LIN54	3.79462	-3.94751
Retinoblastoma-like protein 1	RBL1	2.90703	-0.838074		MAX gene-associated protein	MGA	3.60573	-2.42989		Protein lin-9 homolog	LIN9	3.75926	-4.18267
Protein lin-37 homolog	LIN37	2.68874	-4.06284		Lethal(3)malignant brain tumor-like protein 2	L3MBTL2	3.59443	-2.87853		Transcription factor E2F4	E2F4	3.63691	-4.26868
Transcription factor E2F5	E2F5	2.59019	-3.38382		Protein lin-54 homolog	LIN54	3.49006	-3.92154		PR domain-containing protein 11	PRDM11	3.42344	-2.94675
Dehydrogenase/reductase SDR family member 2, mitochondrial	DHRS2	2.56142	1.74906		Splicing factor U2AF 35 kDa subunit	U2AF1	3.21434	-3.49678		Retinoblastoma-like protein 2	RBL2	3.36219	-4.04071
Protein lin-54 homolog	LIN54	2.54087	-4.86733		Protein lin-52 homolog	LIN52	3.20174	-5.69623		Zinc finger and BTB domain-containing protein 25	ZBTB25	3.30277	-2.42919
Protein lin-9 homolog	LIN9	2.49741	-4.24152		Transcription factor Dp-1	TFDP1	3.19698	-3.77472		Protein lin-37 homolog	LIN37	3.30137	-3.65294
Protein lin-52 homolog	LIN52	2.4926	-2.98736		Antigen KI-67	MKI67	3.17369	1.69153		Transcription factor E2F6	E2F6	3.19755	-3.20344
Transcription factor E2F4	E2F4	2.36152	-5.04292		Nucleolar and spindle-associated protein 1	NUSAP1	3.12714	1.60265		Zinc finger protein 639	ZNF639	3.05478	-3.33243
Retinoblastoma-like protein 2	RBL2	2.24166	-5.19538		Transcription factor Ovo-like 2	OVOL2	3.11263	-1.14711		DNA-dependent protein kinase catalytic subunit	PRKDC	2.80358	-2.51622
Lethal(3)malignant brain tumor-like protein 2	L3MBTL2	2.17361	-1.37838		Splicing factor U2AF 65 kDa subunit	U2AF2	2.89908	-3.60639		Putative transcription factor Ovo-like 1	OVOL1	2.47519	-2.40003
Transcription factor Ovo-like 2	OVOL2	2.06191	-1.42969		Transcription factor E2F5	E2F5	2.6184	-5.92402		DNA polymerase beta	POLB	2.46665	-2.20949
MAX gene-associated protein	MGA	2.04653	-1.47213		ATP-dependent DNA helicase Q1	RECQL	2.53099	-2.32662			DEK	2.46577	-1.3712
DNA topoisomerase 2-alpha	TOP2A	2.04296	1.51949		Dehydrogenase/reductase SDR family member 2, mitochondrial	DHRS2	2.50393	2.59591		RNA-binding protein FUS	FUS	2.46137	0.107152
Zinc finger protein 282	ZNF282	2.03284	-2.35594		Retinoblastoma-like protein 2	RBL2	2.36989	-4.11706		TATA-binding protein-associated factor 2N	TAF15	2.43184	0.236829
Nucleolar and spindle-associated protein 1	NUSAP1	1.92748	2.33725		Centromere protein Q	CENPQ	2.34792	1.01578		Transcription factor E2F5	E2F5	2.1162	-4.55128
Probable ATP-dependent RNA helicase DDX60-like	DDX60L	1.80451	1.7162		Zinc finger protein 384	ZNF384	2.23475	-5.85927		POZ-, AT hook-, and zinc finger-containing protein 1	PATZ1	2.10088	-2.30936
Mediator of DNA damage checkpoint protein 1	MDC1	1.69955	-0.00148674		DNA topoisomerase 2-alpha	TOP2A	2.18796	1.30036		Probable ATP-dependent RNA helicase DDX17	DDX17	1.99621	0.189919
Putative transcription factor Ovo-like 1	OVOL1	1.48042	-3.22162		Putative transcription factor Ovo-like 1	OVOL1	2.0968	-3.5452		Heterogeneous nuclear ribonucleoprotein A3	HNRNPA3	1.98725	0.115566
ATP-dependent DNA helicase Q1	RECQL	1.39988	-1.16556		Zinc finger protein 512B	ZNF512B	2.05008	-2.07844		RNA-binding protein 45	RBM45	1.94748	-0.332498
Transcriptional activator protein Pur-beta	PURB	1.3282	-1.59518		Polycomb group RING finger protein 6	PCGF6	1.96155	-1.96917		Protein DEK	DEK	1.88151	-1.44077
Chromatin assembly factor 1 subunit A	CHAF1A	1.3062	0.990737		Myelin expression factor 2	MYEF2	1.93165	-2.05242		Polycomb group RING finger protein 6	PCGF6	1.85941	-1.54835
Centrin-3	CETN3	1.26712	1.31968		DNA-binding protein SMUBP-2	IGHMBP2	1.90169	-2.12142		Transcription factor Ovo-like 2	OVOL2	1.8193	-1.97398
Early growth response protein 3;E3 SUMO-protein ligase EGR2;Early growth response protein 1;Early growth response protein 4	EGR3;EGR2;EGR1;EGR4	1.24732	1.98838		Myc-associated zinc finger protein	MAZ	1.90146	-1.53466		Lethal(3)malignant brain tumor-like protein 2	L3MBTL2	1.81529	-1.34802
Chromatin assembly factor 1 subunit B	CHAF1B	1.23125	0.900722		Heterogeneous nuclear ribonucleoproteins C1/C2	HNRNPC	1.80471	-1.86176		Probable ATP-dependent RNA helicase DDX5	DDX5	1.80562	-0.109608
Protein BANP	BANP	1.21611	-1.80783		WD repeat-containing protein 5	WDR5	1.78027	-0.853944		ATP-dependent RNA helicase DDX3X;ATP-dependent RNA helicase DDX3Y	DDX3X;DDX3Y	1.78852	-0.12551
Serpin B12	SERPINB12	1.16659	0.447421		Probable ATP-dependent RNA helicase DDX60-like	DDX60L	1.75847	1.72063		MAX gene-associated protein	MGA	1.77307	-1.30102
ATP-binding cassette sub-family F member 1	ABCF1	1.14032	-1.01888		PC4 and SFRS1-interacting protein	PSIP1	1.71774	-1.98159		Transcription factor A, mitochondrial	TFAM	1.76634	-1.76077
Probable U3 small nucleolar RNA-associated protein 11	UTP11L	1.00425	1.28735		Histone-binding protein RBBP4	RBBP4	1.67667	-1.18406		RNA-binding protein 14	RBM14	1.72971	-0.0687557
Dolichol-phosphate mannosyltransferase subunit 1	DPM1	0.99139	-0.367732		ATP-binding cassette sub-family F member 1	ABCF1	1.65444	-1.57686		RNA-binding motif protein, X chromosome;RNA-binding motif protein, X chromosome, N-terminally processed	RBMX	1.69042	-0.12874
Transcriptional activator protein Pur-alpha	PURA	0.973721	-1.45783		Mediator of DNA damage checkpoint protein 1	MDC1	1.63942	-0.0810795		Ribosomal L1 domain-containing protein 1	RSL1D1	1.67821	-1.72085
Jerky protein homolog-like	JRKL	0.944933	-0.848921		Zinc finger X-chromosomal protein;Zinc finger Y-chromosomal protein	ZFX;ZFY	1.63059	-0.297963		PC4 and SFRS1-interacting protein	PSIP1	1.66603	-0.593986
Tigger transposable element-derived protein 2	TIGD2	0.943809	-0.897355		T-box transcription factor TBX6	TBX6	1.62588	0.282143		RNA-binding protein EWS	EWSR1	1.59445	-0.157415
Pyruvate kinase PKM;Pyruvate kinase	PKM	0.925316	-1.0471		Transcription factor Dp-2	TFDP2	1.55792	-3.07777		Histone deacetylase 1	HDAC1	1.58592	-1.02081
60S ribosomal protein L10	RPL10	0.922959	0.195977		THO complex subunit 4	ALYREF	1.53546	-0.917406		Histone-binding protein RBBP4	RBBP4	1.52922	-1.39733
DNA-3-methyladenine glycosylase	MPG	0.890719	-1.04151		RNA-binding protein 42	RBM42	1.49406	-1.87917		High mobility group protein HMG-I/HMG-Y	HMGA1	1.52321	-1.55525
	RPL10	0.889084	0.0764223		Protein lin-37 homolog	LIN37	1.48816	-5.88479		Protein max	MAX	1.50406	-1.35255
Transcription factor 7-like 2;Transcription factor 7-like 1	TCF7L2;TCF7L1	0.886745	-1.46993		ELAV-like protein 1	ELAVL1	1.45822	-1.59959		Aprataxin	APTX	1.49856	-1.40725
Histone H1t	HIST1H1T	0.864889	0.317999		Protein ELYS	AHCTF1	1.43381	-0.653832		Eukaryotic translation initiation factor 5B	EIF5B	1.4939	-1.67236
High mobility group protein HMG-I/HMG-Y	HMGA1	0.840926	-0.705241		Protein NipSnap homolog 1	NIPSNAP1	1.43355	-0.379958		Heterogeneous nuclear ribonucleoprotein R	HNRNPR	1.46352	-0.0889297
WD repeat-containing protein 5	WDR5	0.824809	-0.30107		Pyruvate kinase PKM;Pyruvate kinase	PKM	1.38411	-1.49745		Bifunctional polynucleotide phosphatase/kinase;Polynucleotide 3-phosphatase;Polynucleotide 5-hydroxyl-kinase	PNKP	1.46059	-0.792607
Protein NipSnap homolog 1	NIPSNAP1	0.808344	-0.0316659		Histone deacetylase 1	HDAC1	1.35265	-0.566015		DAZ-associated protein 1	DAZAP1	1.45217	0.523361
40S ribosomal protein S8	RPS8	0.803062	0.490365		Chromatin assembly factor 1 subunit B	CHAF1B	1.32763	1.04362		Lysine-specific demethylase 2A	KDM2A	1.43045	-1.31581
Hepatoma-derived growth factor-related protein 2	HDGFRP2	0.794021	-0.0539879		S1 RNA-binding domain-containing protein 1	SRBD1	1.32751	-0.956404		Heterogeneous nuclear ribonucleoprotein A0	HNRNPA0	1.41354	-0.651881
ATPase family AAA domain-containing protein 5	ATAD5	0.788853	0.803392		Methyl-CpG-binding protein 2	MECP2	1.29719	-0.378063		Nucleolar transcription factor 1	UBTF	1.3686	-0.213287
Lysine-specific demethylase 2A	KDM2A	0.747087	-2.76778		Hepatoma-derived growth factor-related protein 2	HDGFRP2	1.29649	-0.393406		E3 ubiquitin-protein ligase RING1	RING1	1.36166	-0.935007
PC4 and SFRS1-interacting protein	PSIP1	0.699107	-0.905764		Ribosomal L1 domain-containing protein 1	RSL1D1	1.28256	-1.62758		Heterochromatin protein 1-binding protein 3	HP1BP3	1.35913	-1.28286
Protein ELYS	AHCTF1	0.683831	0.119688		60S ribosomal protein L7-like 1	RPL7L1	1.25084	1.11975		Histone deacetylase 2	HDAC2	1.3293	-0.925275
Target of EGR1 protein 1	TOE1	0.676628	-0.481969		Dolichyl-diphosphooligosaccharide--protein glycosyltransferase subunit 1	RPN1	1.25054	-2.01287		Chromobox protein homolog 1	CBX1	1.32539	-0.0982121
Serine/threonine-protein kinase TAO1	TAOK1	0.649018	0.370053		Target of EGR1 protein 1	TOE1	1.22786	-1.29149		Myoneurin	MYNN	1.20802	-0.882332
Endonuclease III-like protein 1	NTHL1	0.648557	-0.43012		Chromatin assembly factor 1 subunit A	CHAF1A	1.21748	1.16221		RNA-binding protein 28	RBM28	1.20408	-0.584393
Thymocyte nuclear protein 1	THYN1	0.647176	-0.729196		Sp110 nuclear body protein	SP110	1.21593	1.19717		Transcription elongation factor, mitochondrial	TEFM	1.18574	-1.38568
TBC1 domain family member 10B	TBC1D10B	0.640066	0.764261		DnaJ homolog subfamily C member 9	DNAJC9	1.20339	-1.17853		RING1 and YY1-binding protein	TEFM	1.18549	-0.931838
Sorting nexin-33	SNX33	0.62714	0.503959		Transcription factor 7-like 2	TCF7L2	1.19226	-1.71809		DNA repair protein XRCC1	XRCC1;FOXH1	1.17517	-0.975964
MHC class II regulatory factor RFX1	RFX1	0.618615	-0.22361		ATPase family AAA domain-containing protein 5	ATAD5	1.17996	0.751806		Tigger transposable element-derived protein 2	TIGD2	1.16941	-0.8259
Carboxyl-terminal PDZ ligand of neuronal nitric oxide synthase protein	NOS1AP	0.61711	1.29449		SPATS2-like protein	SPATS2L	1.154	-0.435983		RNA-binding protein 34	RBM34	1.16124	-0.824571
Methyl-CpG-binding protein 2	MECP2	0.612777	0.0718999		Dolichol-phosphate mannosyltransferase subunit 1	DPM1	1.13934	-0.8117		B-cell lymphoma/leukemia 11B	BCL11B	1.15082	-1.84099
Transcription elongation factor, mitochondrial	TEFM	0.590147	-0.599921		Protein RRP5 homolog	PDCD11	1.12287	-1.39525		Nucleolar RNA helicase 2	DDX21	1.14574	-1.18099
Zinc finger X-chromosomal protein;Zinc finger Y-chromosomal protein	ZFX;ZFY	0.586597	0.241962		Centrin-3	CETN3	1.08114	1.19868		Methyl-CpG-binding protein 2	MECP2	1.14574	-0.753337
DNA polymerase subunit gamma-1	POLG	0.56988	-0.359509		Menin	MEN1	1.05721	-1.21511		Chromobox protein homolog 3	CBX3	1.14372	-1.10116
Uncharacterized protein C7orf50	C7orf50	0.566474	-0.452451		Myoneurin	MYNN	1.03415	-1.98348		Thymidylate synthase	TYMS	1.14097	-3.6573
Alpha-enolase;Enolase	ENO1	0.562768	-0.654104		Chromobox protein homolog 3	CBX3	1.02467	-0.531719		Jerky protein homolog-like	JRKL	1.11796	-0.879117
Transcription factor AP-2 gamma	TFAP2C	0.560813	1.32998		THAP domain-containing protein 1	THAP1	1.01293	-2.71038		Chromatin target of PRMT1 protein	CHTOP	1.1129	-0.414038
Cytosolic carboxypeptidase 1	AGTPBP1	0.554736	0.566474		Peroxiredoxin-4	PRDX4	1.01128	-1.24499		Mediator of DNA damage checkpoint protein 1	MDC1	1.1109	-0.701154
Eukaryotic translation initiation factor 5B	EIF5B	0.55031	-0.306359		Activated RNA polymerase II transcriptional coactivator p15	SUB1	0.970265	-0.508342		Pre-mRNA-splicing regulator WTAP	WTAP	1.0918	0.262193
Histone H1x	H1FX	0.53963	0.1595		Poly [ADP-ribose] polymerase 1	PARP1	0.953377	-0.95062		Scaffold attachment factor B1	SAFB	1.09065	0.0859685
ADP-ribosylation factor-like protein 6-interacting protein 4	ARL6IP4	0.531569	0.460795		Atherin	SAMD1	0.942984	0.201257		Scaffold attachment factor B2	SAFB2	1.07984	-0.104682
Myoneurin	MYNN	0.527971	-0.743714		Protein DEK	DEK	0.927669	-0.496936		Myc-associated zinc finger protein	MAZ	1.07922	-1.26718
Transcription factor AP-4	TFAP4	0.518031	-0.424707		Replication factor C subunit 1	RFC1	0.92448	-0.982563		Nuclear mitotic apparatus protein 1	NUMA1	1.07738	0.412619
Zinc finger protein 512B	ZNF512B	0.516721	-0.534726		Putative RNA-binding protein 15	RBM15	0.904966	-1.00723		Menin	MEN1	1.07389	-0.0488897
Single-stranded DNA-binding protein, mitochondrial	SSBP1	0.487486	-0.19517		Heterochromatin protein 1-binding protein 3	HP1BP3	0.901958	-0.871997		DnaJ homolog subfamily C member 9	DNAJC9	1.07183	-1.0889
Protein DEK	DEK	0.487383	-0.119213		Probable U3 small nucleolar RNA-associated protein 11	UTP11L	0.887213	1.08277		E3 ubiquitin-protein ligase TRIP12	TRIP12	1.0664	-0.333734
E3 ubiquitin-protein ligase RING2	RNF2	0.481402	0.179638		Uncharacterized protein C7orf50	C7orf50	0.886667	-0.546414		DNA ligase 3	LIG3	1.06585	-0.797288
Protein CMSS1	CMSS1	0.473631	0.269632		Replication factor C subunit 2	RFC2	0.881665	-1.23501		Eukaryotic translation initiation factor 3 subunit A	EIF3A	1.06378	-0.0334514
DNA polymerase subunit gamma-2, mitochondrial	POLG2	0.47176	-0.692315		Histone H1t	HIST1H1T	0.872395	0.759838		S1 RNA-binding domain-containing protein 1	SRBD1	1.05908	-1.09912
Centromere protein Q	CENPQ	0.471135	2.06733			RPL10	0.869398	0.738119		Interferon-stimulated 20 kDa exonuclease-like 2	ISG20L2	1.05742	-1.24664
DNA-binding protein RFX5	RFX5	0.46801	-0.95506		40S ribosomal protein S8	RPS8	0.857185	0.847756		Nucleolar and spindle-associated protein 1	NUSAP1	1.05665	-2.152
Zinc finger MYND domain-containing protein 11	ZMYND11	0.461738	-0.218984		60S ribosomal protein L10	RPL10	0.855272	0.809003		SAFB-like transcription modulator	SLTM	1.05582	-0.307591
DNA-directed RNA polymerase I subunit RPA34	CD3EAP	0.456491	-0.521991		Replication factor C subunit 3	RFC3	0.845028	-1.27739		E3 ubiquitin-protein ligase RING2	RNF2	1.052	-0.741903
TATA box-binding protein-associated factor RNA polymerase I subunit A	TAF1A	0.449641	0.85822		Replication factor C subunit 4	RFC4	0.805375	-1.35598		Neutral alpha-glucosidase AB	GANAB	1.04033	-3.21826
Trans-acting T-cell-specific transcription factor GATA-3	GATA3	0.445621	-1.09351		Histone-lysine N-methyltransferase 2A;MLL cleavage product N320;MLL cleavage product C180	KMT2A	0.805045	0.400647		Core histone macro-H2A.2	H2AFY2	1.03132	0.573471
60S ribosomal protein L17	RPL17	0.440208	0.596744		Replication factor C subunit 5	RFC5	0.801573	-1.30743		Histone H3.2	HIST2H3A	0.994145	0.301119
Nucleolar transcription factor 1	UBTF	0.435309	0.209266		Crossover junction endonuclease MUS81	MUS81	0.799087	-0.376789		Zinc finger protein 512	ZNF512	0.985209	-0.828844
Dolichyl-diphosphooligosaccharide--protein glycosyltransferase subunit 1	RPN1	0.424492	0.228111		Tigger transposable element-derived protein 2	TIGD2	0.796847	-0.548079		Bcl-2-associated transcription factor 1	BCLAF1	0.980537	-0.212969
Centromere protein U	CENPU	0.42417	2.46879		RNA-binding protein Raly	RALY	0.793105	-2.16282		Nuclear receptor coactivator 5	NCOA5	0.974089	-0.487197
Protein LLP homolog	LLPH	0.420078	0.370053		Dimethyladenosine transferase 1, mitochondrial	TFB1M	0.792106	0.327342		Cold-inducible RNA-binding protein	CIRBP	0.968275	-1.73976
DNA-directed RNA polymerase I subunit RPA49	POLR1E	0.413919	-0.259703		DNA-binding protein RFX5	RFX5	0.766977	-1.01368		Probable 28S rRNA (cytosine(4447)-C(5))-methyltransferase	NOP2	0.947255	-1.31588
TATA box-binding protein-associated factor RNA polymerase I subunit D	TAF1D	0.411969	0.757023		CCAAT/enhancer-binding protein zeta	CEBPZ	0.75873	0.603027		Tyrosine-protein kinase BAZ1B	BAZ1B	0.937646	0.498353
TATA box-binding protein-associated factor RNA polymerase I subunit C	TAF1C	0.41045	0.982802		Nucleolar transcription factor 1	UBTF	0.728922	-0.0111954		Cyclic GMP-AMP synthase	MB21D1	0.936666	0.305795
CXXC-type zinc finger protein 5	CXXC5	0.409364	-1.06851		Interferon-stimulated 20 kDa exonuclease-like 2	ISG20L2	0.728922	-0.865832		Thyroid hormone receptor-associated protein 3	THRAP3	0.93395	-0.192925
		0.407081	-0.080637				0.714311	0.488412		Nucleolar transcription factor 1	UBTF	0.930472	-0.628385
Centromere protein V	CENPV	0.393526	0.45386		Probable ATP-dependent RNA helicase DDX52	DDX52	0.707348	-0.968323		Small nuclear ribonucleoprotein E	SNRPE	0.93017	-1.95736
Poly [ADP-ribose] polymerase 1	PARP1	0.391328	-0.322108		RNA-binding protein 34	RBM34	0.699019	-0.983646		Interleukin enhancer-binding factor 2	ILF2	0.919378	-0.486368
DNA-directed RNA polymerase I subunit RPA34	CD3EAP	0.390227	-0.482835		Semaphorin-3C	SEMA3C	0.698396	-0.16694		YLP motif-containing protein 1	YLPM1	0.915942	-0.394354
Transcription initiation factor TFIID subunit 9B	TAF9B	0.388355	0.403922		Protein CMSS1	CMSS1	0.688046	0.375846		Chromobox protein homolog 8	CBX8	0.909351	0.159112
Dimethyladenosine transferase 1, mitochondrial	TFB1M	0.37951	0.0890913		Trans-acting T-cell-specific transcription factor GATA-3	GATA3	0.687688	-0.95929		Periphilin-1	PPHLN1	0.893362	-0.154859
TATA box-binding protein-associated factor RNA polymerase I subunit B	TAF1B	0.366588	0.816559		DNA-3-methyladenine glycosylase	MPG	0.676989	-0.299223		ELAV-like protein 1	ELAVL1	0.890952	-1.16592
40S ribosomal protein S4, X isoform	RPS4X	0.361095	0.276675		Retinoblastoma-binding protein 5	RBBP5	0.672199	0.349365		RNA-binding protein 12B	RBM12B	0.882447	0.0160684
Sp110 nuclear body protein	SP110	0.356031	1.59378		WD repeat-containing protein 46	WDR46	0.669662	-0.941753		Core histone macro-H2A.1;Histone H2A	H2AFY	0.880881	0.479334
Transcription initiation factor TFIID subunit 12	TAF12	0.352194	0.456491		BUD13 homolog	BUD13	0.66102	-0.318452		Heterogeneous nuclear ribonucleoproteins A2/B1	HNRNPA2B1	0.865998	-0.386299
Nucleolar protein 56	NOP56	0.348346	0.640158		DNA-directed RNA polymerase I subunit RPA34	CD3EAP	0.656451	-0.367937		Putative oxidoreductase GLYR1	GLYR1	0.847195	-1.01293
Serine/threonine-protein kinase TAO3	TAOK3	0.348346	-0.797589		Protein ENL	MLLT1	0.656268	-1.1042		Protein ELYS	AHCTF1	0.839073	-0.371982
Transcription termination factor 1	TTF1	0.341075	0.350724		SAFB-like transcription modulator	SLTM	0.648005	0.271545		Interleukin enhancer-binding factor 3	ILF3	0.837863	-0.33248
SPATS2-like protein	SPATS2L	0.335826	0.240498		Putative RNA-binding protein 15B	RBM15B	0.639695	-0.798642		Polycomb protein EED	EED	0.794936	-0.212935
Probable ATP-dependent RNA helicase DDX52	DDX52	0.333309	-0.781182		Set1/Ash2 histone methyltransferase complex subunit ASH2	ASH2L	0.638306	0.351628		Polycomb protein SUZ12	SUZ12	0.794853	0.143393
Chromobox protein homolog 6	CBX6	0.330673	-0.218145		Importin subunit alpha-3	KPNA4	0.626579	-1.6175		Methyl-CpG-binding domain protein 2	MBD2	0.790689	0.313942
Nucleolar protein 58	NOP58	0.317767	0.595217		Jerky protein homolog-like	JRKL	0.619929	-0.488228		Crossover junction endonuclease MUS81	MUS81	0.782073	-0.836476
Protein RRP5 homolog	PDCD11	0.316493	-0.531761		40S ribosomal protein S4, X isoform	RPS4X	0.619272	0.325041		Protein FAM98A	FAM98A	0.774924	-0.754991
	LOC102288414	0.309409	0.237319		E3 ubiquitin-protein ligase TRIP12	TRIP12	0.608525	-1.22989		Heterogeneous nuclear ribonucleoprotein Q	SYNCRIP	0.769856	-0.641289
Uncharacterized protein C3orf17	C3orf17	0.309293	0.448372		RNA-binding protein 28	RBM28	0.607105	-0.881188		SPATS2-like protein	SPATS2L	0.754374	-1.30672
Nuclear apoptosis-inducing factor 1	NAIF1	0.304161	-0.0350026		E3 ubiquitin-protein ligase RING2	RNF2	0.602267	-0.828588		Target of EGR1 protein 1	TOE1	0.752577	-0.631243
rRNA/tRNA 2-O-methyltransferase fibrillarin-like protein 1	FBLL1	0.298541	0.62798		Nucleolar and coiled-body phosphoprotein 1	NOLC1	0.597984	-0.213956		FACT complex subunit SPT16	SUPT16H	0.749062	1.65499
Ribosomal RNA-processing protein 8	RRP8	0.297954	0.439464		TATA box-binding protein-associated factor RNA polymerase I subunit C	TAF1C	0.593115	0.986739		WD repeat-containing protein 5	WDR5	0.748719	-0.31165
Core-binding factor subunit beta	CBFB	0.296428	-0.190833		Transcription elongation factor, mitochondrial	TEFM	0.593019	-0.495288		Centromere protein V	CENPV	0.747516	-1.12221
Transcription initiation factor TFIID subunit 2	TAF2	0.29337	0.554638		DNA-dependent protein kinase catalytic subunit	PRKDC	0.590434	-2.91441		Polypyrimidine tract-binding protein 3	PTBP3	0.745539	-1.53965
NHP2-like protein 1;NHP2-like protein 1, N-terminally processed	NHP2L1	0.288654	0.694836		High mobility group protein B1;Putative high mobility group protein B1-like 1	HMGB1;HMGB1P1	0.58938	0.104739		Enhancer of rudimentary homolog	ERH	0.742351	-0.574799
Cancer/testis antigen family 45 member A2;Cancer/testis antigen family 45 member A3;Cancer/testis antigen family 45 member A1	CT45A2;CT45A3;CT45A1	0.280719	0.157302		Host cell factor 2	HCFC2	0.58111	0.575506		DNA topoisomerase 2-beta;DNA topoisomerase 2	TOP2B	0.737427	0.0147838
Multiple myeloma tumor-associated protein 2	MMTAG2	0.271545	0.038998		Eukaryotic translation initiation factor 5B	EIF5B	0.57056	-0.32348		Probable ATP-dependent RNA helicase DDX52	DDX52	0.736562	-0.752947
rRNA 2-O-methyltransferase fibrillarin	FBL	0.268195	0.562963		Probable ATP-dependent RNA helicase DDX10	DDX10	0.569491	0.806118		Histone H3	HIST2H3PS2	0.730227	0.487589
Guanine nucleotide-binding protein-like 3-like protein	GNL3L	0.260507	0.176195		Serine/threonine-protein kinase TAO1	TAOK1	0.562377	0.600841		Hepatoma-derived growth factor-related protein 2	HDGFRP2	0.706906	-0.993953
Uncharacterized protein C1orf226	C1orf226	0.256528	0.493032		Lysine-specific demethylase PHF2	PHF2	0.556405	-0.932086		FACT complex subunit SSRP1	SSRP1	0.704872	1.58732
Transcription initiation factor TFIID subunit 1;Transcription initiation factor TFIID subunit 1-like	TAF1;TAF1L	0.256044	0.491802		Ribosomal RNA-processing protein 8	RRP8	0.554736	-0.0134944		WD repeat-containing protein 46	WDR46	0.70044	-0.503957
Transcription initiation factor TFIID subunit 10	TAF10	0.253263	0.354226		Centromere protein U	CENPU;MLF1IP	0.552574	1.15316		BCL-6 corepressor-like protein 1	BCORL1	0.698663	-0.420163
Transcription factor Sp3	SP3	0.249021	0.548239		Thymocyte nuclear protein 1	THYN1	0.546956	-0.522219		Zinc finger protein 512B	ZNF512B	0.692516	-0.566848
Transcription initiation factor TFIID subunit 5	TAF5	0.248413	0.265317		Histone H1x	H1FX	0.544485	0.30871		Transcriptional repressor p66-beta	GATAD2B	0.687509	0.365693
		0.244887	0.543694		RNA-binding protein 39	RBM39	0.532566	-1.15354		Deoxynucleotidyltransferase terminal-interacting protein 1	DNTTIP1	0.685985	-0.416211
Coiled-coil domain-containing protein 137	CCDC137	0.238665	-0.286902		Cancer/testis antigen family 45 member A2;Cancer/testis antigen family 45 member A3;Cancer/testis antigen family 45 member A1	CT45A2;CT45A3;CT45A1	0.528971	0.564817		Histone-lysine N-methyltransferase EHMT2	EHMT2	0.675997	1.01006
Heterogeneous nuclear ribonucleoproteins C1/C2	HNRNPC	0.236952	0.823016		TATA box-binding protein-associated factor RNA polymerase I subunit B	TAF1B	0.525969	0.836328		ATP-dependent RNA helicase DDX50	DDX50	0.667574	-0.638254
60S ribosomal protein L37a	RPL37A	0.235359	0.302758		High mobility group protein B2	HMGB2	0.521855	0.508327		Splicing factor, proline- and glutamine-rich	SFPQ	0.654161	-0.602723
Semaphorin-3C	SEMA3C	0.235114	-0.416038		TBC1 domain family member 10B	TBC1D10B	0.520146	0.613343		Protein RRP5 homolog	PDCD11	0.638676	-0.333462
Runt-related transcription factor 1	RUNX1	0.229219	0.234133		Signal recognition particle subunit SRP72	SRP72	0.519844	0.0817487		Single-stranded DNA-binding protein, mitochondrial	SSBP1	0.626392	-0.559303
1-phosphatidylinositol 4,5-bisphosphate phosphodiesterase delta-3	PLCD3	0.228111	1.94246		RNA-binding motif protein, X-linked 2	RBMX2	0.518334	-0.342287		Protein BANP	BANP	0.622368	-0.942307
Signal recognition particle 14 kDa protein	SRP14	0.226632	-0.0636956		Peregrin	BRPF1	0.514905	-0.137791		Polycomb group RING finger protein 1	PCGF1	0.619272	-0.348776
Peptidyl-prolyl cis-trans isomerase A;Peptidyl-prolyl cis-trans isomerase A, N-terminally processed;Peptidyl-prolyl cis-trans isomerase	PPIA	0.226015	-3.4399		TATA box-binding protein-associated factor RNA polymerase I subunit D	TAF1D	0.512985	0.681944		Putative histone H2B type 2-D;Putative histone H2B type 2-C	HIST2H2BD;HIST2H2BC	0.60966	0.0581086
39S ribosomal protein L33, mitochondrial	MRPL33	0.225028	0.217727		Nucleolar transcription factor 1	UBTF	0.512379	-0.247474		Histone H4	HIST1H4A	0.595217	0.216362
TATA-box-binding protein;TATA box-binding protein-like protein 2	TBP;TBPL2	0.224411	0.562279		Putative oxidoreductase GLYR1	GLYR1	0.508733	-1.28655		Apoptotic chromatin condensation inducer in the nucleus	ACIN1	0.594357	0.161436
60S ribosomal protein L21	RPL21	0.220454	0.250113		60S ribosomal protein L38	RPL38	0.50019	0.689746		Probable ATP-dependent RNA helicase DDX31	DDX31	0.589476	-0.514367
Transcription initiation factor TFIID subunit 13	TAF13	0.220082	0.411318		Eukaryotic translation initiation factor 6	EIF6	0.494774	0.427928		Poly [ADP-ribose] polymerase 1	PARP1	0.588325	-0.471609
Serine/threonine-protein kinase TAO2	TAOK2	0.217603	-0.0154617		Importin subunit alpha-4	KPNA3	0.494057	-0.955872		6-phosphogluconate dehydrogenase, decarboxylating	PGD	0.586404	-1.88395
Chromodomain-helicase-DNA-binding protein 1	CHD1	0.217107	0.560813		3-hydroxyacyl-CoA dehydrogenase type-2	HSD17B10	0.492315	-0.371012		Replication factor C subunit 4	RFC4	0.569199	-0.761164
Transcription initiation factor TFIID subunit 4	TAF4	0.216734	0.398131		TATA box-binding protein-associated factor RNA polymerase I subunit A	TAF1A	0.490981	0.887057		Replication factor C subunit 5	RFC5	0.56472	-0.816291
Core histone macro-H2A.1;Histone H2A	H2AFY	0.214374	0.378845		Probable ribosome biogenesis protein RLP24	RSL24D1	0.489646	0.318809		Myelin expression factor 2	MYEF2	0.564525	-0.493154
E3 ubiquitin-protein ligase RBBP6	RBBP6	0.214374	0.41045		Serine/threonine-protein kinase TAO2	TAOK2	0.484293	-0.117443		Semaphorin-3C	SEMA3C	0.562377	-0.379057
THAP domain-containing protein 1	THAP1	0.213254	-1.08568		Serine/threonine-protein kinase TAO3	TAOK3	0.482952	-0.670268		UV excision repair protein RAD23 homolog B	RAD23B	0.561008	0.0416635
Krueppel-like factor 13	KLF13	0.207893	-0.455119		60S ribosomal protein L17	RPL17	0.482229	0.459117		Replication factor C subunit 3	RFC3	0.558855	-0.756965
Histone-lysine N-methyltransferase 2A;MLL cleavage product N320;MLL cleavage product C180	KMT2A	0.203765	0.845751		Zinc finger MYND domain-containing protein 11	ZMYND11	0.480679	0.416516		Replication factor C subunit 2	RFC2	0.552279	-0.749984
Histone-lysine N-methyltransferase ASH1L	ASH1L	0.19862	0.836328		Tricarboxylate transport protein, mitochondrial	SLC25A1	0.47633	-0.0872428		Centromere protein U	CENPU;MLF1IP	0.548239	-0.633143
Serrate RNA effector molecule homolog	SRRT	0.198494	1.5614		Coiled-coil domain-containing protein 137	CCDC137	0.47415	-0.254651		Putative RNA-binding protein 15B	RBM15B	0.546067	0.133827
60S ribosomal protein L24	RPL24	0.197362	0.201759		Nucleolar protein 6	NOL6	0.462995	-0.151282		Periodic tryptophan protein 1 homolog	PWP1	0.543892	-0.180054
Triosephosphate isomerase	TPI1	0.194844	-1.37415		Nucleolar protein 16	NOP16	0.461633	0.413811		Serine/arginine-rich splicing factor 10	SRSF10	0.53973	0.434988
Trimethylguanosine synthase	TGS1	0.194591	0.473215		DNA-directed RNA polymerase I subunit RPA49	POLR1E	0.458487	-0.365871		ATP-dependent RNA helicase DDX55	DDX55	0.539035	-1.10166
40S ribosomal protein S26;Putative 40S ribosomal protein S26-like 1	RPS26;RPS26P11	0.193709	0.0871912		HMG box transcription factor BBX	BBX	0.457542	-0.27521		BCL-6 corepressor	BCOR	0.533364	-0.166244
Signal recognition particle 9 kDa protein	SRP9	0.187008	0.0357647		DNA-directed RNA polymerase I subunit RPA34	CD3EAP	0.455965	-0.413538		Non-POU domain-containing octamer-binding protein	NONO	0.528771	-0.817943
Probable ATP-dependent RNA helicase DDX10	DDX10	0.183582	1.17082		Endonuclease III-like protein 1	NTHL1	0.455755	0.0569996		Lysine-specific demethylase PHF2	PHF2	0.527471	-0.225295
Deoxynucleotidyltransferase terminal-interacting protein 1	DNTTIP1	0.182184	0.160146		Sphingosine-1-phosphate lyase 1	SGPL1	0.454071	-0.464524		Lysine-specific demethylase 2B	KDM2B	0.515914	-0.16083
Guanine nucleotide-binding protein-like 3	GNL3	0.181421	0.141564		Nucleolar protein 56	NOP56	0.449324	0.596935		Transformer-2 protein homolog alpha	TRA2A	0.503247	-0.00212232
BUD13 homolog	BUD13	0.180912	0.129085		N-acylneuraminate cytidylyltransferase	CMAS	0.447209	-1.39574		Zinc finger MYND domain-containing protein 11	ZMYND11	0.50019	0.201508
Transcription initiation factor TFIID subunit 7	TAF7	0.178109	0.181929		Transcriptional repressor CTCF	CTCF	0.437867	-0.105396		DNA polymerase epsilon subunit 3	POLE3	0.499374	-0.0970697
Serine/arginine repetitive matrix protein 1	SRRM1	0.176323	0.200881		E3 ubiquitin-protein ligase RING1	RING1	0.435629	-0.801204		Histone H2A type 2-C;Histone H2A type 2-A	HIST2H2AC;HIST2H2AA3	0.498149	0.0475384
Transcription initiation factor TFIID subunit 3	TAF3	0.171847	0.335026		Carboxyl-terminal PDZ ligand of neuronal nitric oxide synthase protein	NOS1AP	0.421587	1.67771		Cell growth-regulating nucleolar protein	LYAR	0.496309	0.334454
ATP-dependent RNA helicase DDX54	DDX54	0.171207	-0.00481219		Lysine-specific demethylase 2B	KDM2B	0.41792	-0.241492		DNA-directed RNA polymerase I subunit RPA49	POLR1E	0.49211	-1.05925
28S ribosomal protein S5, mitochondrial	MRPS5	0.168257	0.277985		rRNA 2-O-methyltransferase fibrillarin	FBL	0.417272	0.52687		Antigen KI-67	MKI67	0.487075	-0.79809
Histone-binding protein RBBP4	RBBP4	0.165944	-0.178371		p21-activated protein kinase-interacting protein 1	PAK1IP1	0.409364	0.151209		Protein Wiz	WIZ	0.483261	1.31156
Serine protease 23	PRSS23	0.163756	-0.387714		ADP-ribosylation factor-like protein 6-interacting protein 4	ARL6IP4	0.406754	0.580628		Serine protease 23	PRSS23	0.476952	0.369271
Zinc finger protein 362	ZNF362	0.162855	-0.634643		Protein LLP homolog	LLPH	0.405121	0.432425		Metastasis-associated protein MTA2	MTA2	0.464668	0.117562
Nucleolar protein 16	NOP16	0.160533	0.423632		rRNA/tRNA 2-O-methyltransferase fibrillarin-like protein 1	FBLL1	0.402286	0.476122		Replication initiator 1	REPIN1	0.464668	-0.712977
Transcription initiation factor TFIID subunit 6	TAF6	0.159371	0.250355		60S ribosome subunit biogenesis protein NIP7 homolog	NIP7	0.392867	-1.32247		Centromere protein Q	CENPQ	0.461005	-0.424552
60S ribosomal protein L34	RPL34	0.159112	0.290542		ATP-dependent RNA helicase DDX55	DDX55	0.382723	-0.491247		Serine/threonine-protein phosphatase PP1-beta catalytic subunit;Serine/threonine-protein phosphatase	PPP1CB	0.460061	-0.126171
Transcription initiation factor TFIID subunit 9	TAF9;AK6	0.156785	0.170694		ATP-dependent RNA helicase DDX54	DDX54	0.373398	-0.235943		Zinc finger protein 638	ZNF638	0.450274	-0.177849
HMG domain-containing protein 4	HMGXB4	0.14965	0.119157		Protein HIRA	HIRA	0.371726	-0.0560712		Histone-lysine N-methyltransferase 2B	KMT2B	0.448267	-0.0207063
60S ribosomal protein L35	RPL35	0.149129	0.0465609		Nucleolar GTP-binding protein 2	GNL2	0.371392	1.12724		ATP-dependent RNA helicase DDX54	DDX54	0.445515	0.0211954
40S ribosomal protein S30	FAU	0.145221	-0.0716183		NHP2-like protein 1;NHP2-like protein 1, N-terminally processed	NHP2L1	0.371057	0.612683		Coiled-coil domain-containing protein 86	CCDC86	0.437334	0.0427844
High mobility group protein B1;Putative high mobility group protein B1-like 1	HMGB1;HMGB1P1	0.144569	0.399445		Runt-related transcription factor 1	RUNX1	0.370388	0.522156		RNA-binding protein Raly	RALY	0.433814	-0.621266
Cactin	CACTIN	0.140124	-0.636414		Protein FAM102B	FAM102B	0.364348	-0.098382		DNA topoisomerase 2-alpha	TOP2A	0.432853	0.0233263
Zinc finger protein 148	ZNF148	0.136979	4.56389		RRP15-like protein	RRP15	0.361656	-0.148433		F-box/LRR-repeat protein 6	FBXL6	0.429214	0.452701
Translation machinery-associated protein 16	TMA16	0.134615	-0.323227		Trinucleotide repeat-containing gene 18 protein	TNRC18	0.361544	-0.888141		Histone H2B type 1-H;Histone H2B type 2-F;Histone H2B;Histone H2B type 1-L;Histone H2B type 1-M;Histone H2B type 1-N;Histone H2B type 1-C/E/F/G/I;Histone H2B type 1-D;Histone H2B type 1-K	HIST1H2BH;HIST2H2BF;HIST1H2BL;HIST1H2BM;HIST1H2BN;HIST1H2BC;HIST1H2BD;HIST1H2BK	0.425244	0.0578315
Sphingosine-1-phosphate lyase 1	SGPL1	0.131458	-0.139935			PRDM11	0.349931	0.385818		Probable dimethyladenosine transferase	DIMT1	0.418352	-0.511999
RNA-binding protein 34	RBM34	0.129085	-0.327258			LOC102288414	0.343351	0.250234		Histone H2B type 1-O;Histone H2B type 2-E;Histone H2B type 1-B;Histone H2B type 1-J;Histone H2B type 3-B	HIST1H2BO;HIST2H2BE;HIST1H2BB;HIST1H2BJ;HIST3H2BB	0.412619	0.0172093
Phosphatidylinositol 5-phosphate 4-kinase type-2 beta	PIP4K2B	0.119821	0.772139		Sorting nexin-33	SNX33	0.337311	0.629566		Nucleolysin TIAR	TIAL1	0.411535	-0.0427243
Probable rRNA-processing protein EBP2	EBNA1BP2	0.118227	0.200002		Zinc finger CCCH domain-containing protein 18	ZC3H18	0.332164	-0.317085		Histone H1t	HIST1H1T	0.410992	0.0601858
Transcription initiation factor TFIID subunit 11	TAF11	0.111298	0.230941		Zinc finger protein 638	ZNF638	0.331017	0.910349				0.402722	-0.063575
Transcription initiation factor TFIID subunit 8	TAF8	0.110631	0.129349		Multiple myeloma tumor-associated protein 2	MMTAG2	0.329181	0.191815		Serine/threonine-protein phosphatase;Serine/threonine-protein phosphatase PP1-gamma catalytic subunit	PPP1CC	0.400757	-0.165564
Surfeit locus protein 6	SURF6	0.108357	-0.0733174		Ribonuclease P protein subunit p29	POP4	0.327112	0.210888		ELM2 and SANT domain-containing protein 1	ELMSAN1	0.40021	-0.0438095
Zinc finger protein 384	ZNF384	0.10608	-0.976617		Transcription termination factor 1	TTF1	0.326997	0.403159		Heterogeneous nuclear ribonucleoprotein A/B	HNRNPAB	0.397255	-0.134905
Ribosome biogenesis protein NSA2 homolog	NSA2	0.100574	-0.0441367		Splicing factor, arginine/serine-rich 19	SCAF1	0.31904	0.105812		Collagen alpha-1(V) chain	COL5A1	0.394514	0.214374
RNA-binding motif protein, X-linked 2	RBMX2	0.0982848	0.0401209		Fatty acyl-CoA reductase 1	FAR1	0.311503	0.300651		Transformer-2 protein homolog beta	TRA2B	0.384381	0.647729
Ribosome biogenesis protein BRX1 homolog	BRIX1	0.0980152	0.239642		Nucleolar RNA helicase 2	DDX21	0.306146	-2.27355		RNA exonuclease 4	REXO4	0.373843	-0.717003
Cyclin-dependent kinase 11A;Cyclin-dependent kinase 11B	CDK11A;CDK11B	0.0977456	-0.483844		Heterogeneous nuclear ribonucleoprotein U	HNRNPU	0.303459	-0.325322		DNA repair protein complementing XP-C cells	XPC	0.373286	0.292664
DnaJ homolog subfamily A member 3, mitochondrial	DNAJA3	0.0976108	-0.00443589		Core histone macro-H2A.1;Histone H2A	H2AFY	0.301939	0.0532504		Poly [ADP-ribose] polymerase 2	PARP2	0.367036	-0.302635
Ribosomal RNA processing protein 1 homolog B	RRP1B	0.0973411	-0.0420408		Suppressor of SWI4 1 homolog	PPAN	0.301588	-0.228216		Heterogeneous nuclear ribonucleoproteins C1/C2	HNRNPC	0.354903	-0.52666
Cyclic AMP-responsive element-binding protein 1	CREB1	0.0951818	-0.600031		Transcription factor Sp3	SP3	0.297602	0.482745		Mortality factor 4-like protein 1	MORF4L1	0.347892	0.177471
Activated RNA polymerase II transcriptional coactivator p15	SUB1	0.0812033	0.097476		Nucleolar protein of 40 kDa	ZCCHC17	0.289834	-0.0292347		Heterogeneous nuclear ribonucleoprotein A1;Heterogeneous nuclear ribonucleoprotein A1, N-terminally processed;Heterogeneous nuclear ribonucleoprotein A1-like 2	HNRNPA1;HNRNPA1L2	0.346985	-0.975907
Protein FAM111A	FAM111A	0.0807941	0.306729				0.288536	-0.612086		S-phase kinase-associated protein 1	SKP1	0.346985	-0.544792
RNA-binding protein Raly	RALY	0.0791562	0.772899		Translation machinery-associated protein 16	TMA16	0.287827	-0.0558612		Heterogeneous nuclear ribonucleoprotein H3	HNRNPH3	0.344033	0.0342157
Histone H1.2	HIST1H1C	0.0768327	-0.09968			DDX24	0.286881	-0.0497705		Zinc finger X-chromosomal protein;Zinc finger Y-chromosomal protein	ZFX;ZFY	0.343806	0.0375931
Nucleolar complex protein 3 homolog	NOC3L	0.0753273	0.907275		Cytosolic carboxypeptidase 1	AGTPBP1	0.286408	0.805953		Histone H1x	H1FX	0.340961	-0.659153
Histone H1.3	HIST1H1D	0.0712135	0.0517201		POZ-, AT hook-, and zinc finger-containing protein 1	PATZ1	0.285698	-1.85517		SWI/SNF-related matrix-associated actin-dependent regulator of chromatin subfamily D member 2	SMARCD2	0.331934	0.187008
Histone H1.5	HIST1H1B	0.0650208	-0.0327576		Ras GTPase-activating-like protein IQGAP1	IQGAP1	0.284751	0.687509		UV excision repair protein RAD23 homolog A	RAD23A	0.327112	-0.0891753
Probable ribosome biogenesis protein RLP24	RSL24D1	0.0621217	0.645333		Nucleolar protein 58	NOP58	0.284396	0.592158		KRR1 small subunit processome component homolog	KRR1	0.325847	-0.487905
Nucleolar transcription factor 1	UBTF	0.0614306	-0.0347366		Histone chaperone ASF1A	ASF1A	0.284277	0.359071		Endonuclease III-like protein 1	NTHL1	0.319849	-0.28891
Interferon-stimulated 20 kDa exonuclease-like 2	ISG20L2	0.0558898	-0.227743		Cyclin-dependent kinase 11B;Cyclin-dependent kinase 11A	CDK11B;CDK11A	0.282499	-0.363531		Replication factor C subunit 1	RFC1	0.319271	-0.376714
U2 snRNP-associated SURP motif-containing protein	U2SURP	0.0540844	0.219091		Polypyrimidine tract-binding protein 1	PTBP1	0.282143	-0.701131		UAP56-interacting factor	FYTTD1	0.313942	-0.680012
60S ribosomal protein L38	RPL38	0.0517201	0.679334		Protein BANP	BANP	0.27608	-0.505574		ATP-dependent RNA helicase DDX24	DDX24	0.311038	-0.241202
DNA-dependent protein kinase catalytic subunit	PRKDC	0.0469799	-2.1667		DNA polymerase subunit gamma-1	POLG	0.268315	-0.0723917		PIN2/TERF1-interacting telomerase inhibitor 1	PINX1	0.308827	-0.785602
60S ribosomal protein L36a-like	RPL36AL	0.0469799	0.0147838		60S ribosomal protein L24	RPL24	0.260267	0.225275		Heterogeneous nuclear ribonucleoprotein U-like protein 1	HNRNPUL1	0.285816	0.0582472
Complement component 1 Q subcomponent-binding protein, mitochondrial	C1QBP	0.0461418	-0.252707		Poly [ADP-ribose] polymerase 2	PARP2	0.259182	-1.13736		ATP-dependent RNA helicase DDX54	DDX54	0.285816	-0.692875
60S ribosomal protein L23a	RPL23A	0.0447438	0.0728604		Probable 28S rRNA (cytosine(4447)-C(5))-methyltransferase	NOP2	0.253868	-1.15859		60S ribosomal protein L4	RPL4	0.284633	-0.414018
Lysine-specific demethylase 2B	KDM2B	0.0444641	-0.187346		Calcineurin-binding protein cabin-1	CABIN1	0.250719	0.649478		UPF0568 protein C14orf166	C14orf166	0.281075	-1.1936
Zinc finger transcription factor Trps1	TRPS1	0.0425043	-0.825721		Heterogeneous nuclear ribonucleoprotein A/B	HNRNPAB	0.244278	-0.141414		Heterogeneous nuclear ribonucleoprotein U	HNRNPU	0.278342	-0.0812016
Rab11 family-interacting protein 1	RAB11FIP1	0.0391384	-1.42915		Nucleolar GTP-binding protein 1	GTPBP4	0.243669	0.569491		HMG domain-containing protein 4	HMGXB4	0.276556	0.78576
Ribosome biogenesis regulatory protein homolog	RRS1	0.038998	0.172616		DNA repair protein complementing XP-C cells	XPC	0.241474	-0.140857		Histone-binding protein RBBP7	RBBP7	0.270469	-0.372169
60S ribosomal protein L26-like 1	RPL26L1	0.0356239	-0.0339683		Putative eukaryotic translation initiation factor 2 subunit 3-like protein;Eukaryotic translation initiation factor 2 subunit 3	EIF2S3L;EIF2S3	0.240864	-0.0639972		Histone H2A.V;Histone H2A.Z;Histone H2A	H2AFV;H2AFZ	0.267116	0.00317044
Nucleolar protein of 40 kDa	ZCCHC17	0.0342157	0.109294		Nuclear apoptosis-inducing factor 1	NAIF1	0.240742	0.164014		rRNA-processing protein UTP23 homolog	UTP23	0.266996	-0.352455
Runt-related transcription factor 2	RUNX2	0.0302654	-0.466058		Chromodomain-helicase-DNA-binding protein 6	CHD6	0.238665	0.185867		Surfeit locus protein 6	SURF6	0.266757	0.151209
UPF0711 protein C18orf21	C18orf21	0.0292762	0.6291		Serine/arginine repetitive matrix protein 1	SRRM1	0.238542	0.147307		Protein transport protein Sec23A	SEC23A	0.255199	-0.739517
DNA topoisomerase 1	TOP1	0.028852	-0.0841044		DNA polymerase beta	POLB	0.23842	-1.35738		Zinc finger protein 22	ZNF22	0.253747	-0.495268
X-ray repair cross-complementing protein 5	XRCC5	0.0213376	-1.10846		60S ribosomal protein L37a	RPL37A	0.237074	0.363003		ALS2 C-terminal-like protein	ALS2CL	0.247928	0.0926134
DNA repair protein complementing XP-C cells	XPC	0.0209111	0.0117819		LINE-1 retrotransposable element ORF1 protein	L1RE1	0.230572	1.66857		Histone-lysine N-methyltransferase EHMT1	EHMT1	0.245009	0.889162
Centrin-2	CETN2	0.0184917	0.186247		DNA mismatch repair protein Msh3	MSH3	0.227618	0.153676		Calpain-2 catalytic subunit	CAPN2	0.244156	-2.16884
DNA topoisomerase I, mitochondrial	TOP1MT	0.0180644	-0.0822704		Centrin-2	CETN2	0.227125	-0.0240177		Heterogeneous nuclear ribonucleoprotein H;Heterogeneous nuclear ribonucleoprotein H, N-terminally processed	HNRNPH1	0.240253	-0.164933
Lysine-rich nucleolar protein 1	KNOP1	0.0167816	-0.117615		Cell division cycle 5-like protein	CDC5L	0.226139	-0.10183		THAP domain-containing protein 1	THAP1	0.237564	-0.356846
DNA mismatch repair protein Msh3	MSH3	0.0164963	0.276199		Ribosome biogenesis protein BRX1 homolog	BRIX1	0.214	0.23842		Putative nuclease HARBI1	HARBI1	0.230818	0.0973411
Putative nuclease HARBI1	HARBI1	0.0153548	-0.475114		Heterogeneous nuclear ribonucleoprotein M	HNRNPM	0.210888	-0.993149		DNA-directed RNA polymerase I subunit RPA34	CD3EAP	0.227987	-0.827769
Retinoblastoma-binding protein 5	RBBP5	0.00590296	0.720454		Single-stranded DNA-binding protein, mitochondrial	SSBP1	0.210888	0.0790196		Nucleosome-remodeling factor subunit BPTF	BPTF	0.226878	1.02304
Leydig cell tumor 10 kDa protein homolog	C19orf53	0.00230647	-0.213153		40S ribosomal protein S26;Putative 40S ribosomal protein S26-like 1	RPS26;RPS26P11	0.204767	0.218099		Nucleolar GTP-binding protein 1	GTPBP4	0.226632	0.814755
Eukaryotic translation initiation factor 6	EIF6	-0.00021642	0.224534		Core-binding factor subunit beta	CBFB	0.204516	0.310224		DNA-3-methyladenine glycosylase	MPG	0.209391	-0.274302
Nucleolar and coiled-body phosphoprotein 1	NOLC1	-0.00434906	0.272979		Ribosome production factor 2 homolog	RPF2	0.203765	-0.0474726		Importin subunit alpha-3	KPNA4	0.204516	-0.22732
X-ray repair cross-complementing protein 6	XRCC6	-0.0086387	-1.1665		E3 ubiquitin-protein ligase RBBP6	RBBP6	0.196859	0.369383		Ribonuclease P protein subunit p29	POP4	0.201257	0.166201
Tricarboxylate transport protein, mitochondrial	SLC25A1	-0.0091758	0.0626744		60S ribosomal protein L23	RPL23	0.19333	0.0809305		Thymocyte nuclear protein 1	THYN1	0.1956	-0.376714
60S ribosomal protein L36a	RPL36A;RPL36A-HNRNPH2	-0.00982931	-0.162008		Putative histone H2B type 2-D;Putative histone H2B type 2-C	HIST2H2BD;HIST2H2BC	0.185232	0.191184		5-methylcytosine rRNA methyltransferase NSUN4	NSUN4	0.182057	-0.455633
Telomerase Cajal body protein 1	WRAP53	-0.010425	0.825053		60S ribosomal protein L21	RPL21	0.181421	0.527371		Heterogeneous nuclear ribonucleoprotein U-like protein 2	HNRNPUL2	0.173127	0.292075
Protein FAM102B	FAM102B	-0.0112535	-0.134018		Bromodomain adjacent to zinc finger domain protein 2B	BAZ2B	0.178492	-0.305931		RNA-binding motif protein, X-linked 2	RBMX2	0.167229	-0.689125
DNA mismatch repair protein Msh2	MSH2	-0.0115734	0.283448		DNA topoisomerase I, mitochondrial	TOP1MT	0.177599	-0.102295		60S ribosomal protein L7-like 1	RPL7L1	0.165815	-0.723825
BCL-6 corepressor-like protein 1	BCORL1	-0.0133488	0.461948		Sentrin-specific protease 5	SENP5	0.17594	0.252173		UPF0711 protein C18orf21	C18orf21	0.163885	0.155749
Nucleolar GTP-binding protein 1	GTPBP4	-0.0148785	0.677531		Nucleolar complex protein 2 homolog	NOC2L	0.174151	0.455334		Endoplasmic reticulum resident protein 44	ERP44	0.163112	-2.1481
rRNA-processing protein UTP23 homolog	UTP23	-0.0243111	-0.691406		MHC class II regulatory factor RFX1	RFX1	0.170951	0.298072		Translation machinery-associated protein 16	TMA16	0.162855	-0.626313
U3 small nucleolar RNA-associated protein 14 homolog A	UTP14A	-0.0247514	0.497025		Nucleolin	NCL	0.168257	-0.143421		Atherin	SAMD1	0.162726	-0.480378
Cell growth-regulating nucleolar protein	LYAR	-0.0303687	-0.274826		Probable rRNA-processing protein EBP2	EBNA1BP2	0.165815	0.160404		Zinc finger protein 384	ZNF384	0.154842	0.308361
Transcription factor Sp1	SP1	-0.031253	0.1038		Ribosome biogenesis protein NSA2 homolog	NSA2	0.164915	0.146003		Activated RNA polymerase II transcriptional coactivator p15	SUB1	0.154324	-1.19021
UAP56-interacting factor	FYTTD1	-0.0319019	-0.106125		4F2 cell-surface antigen heavy chain	SLC3A2	0.164786	0.439357		Ribosomal RNA processing protein 1 homolog A	RRP1	0.146786	-0.13557
Protein FAM32A	FAM32A	-0.0350026	-0.284194		Zinc finger protein 282	ZNF282	0.164014	-1.30376		Metal-response element-binding transcription factor 2	MTF2	0.145873	0.18612
Histone H2B type 1-C/E/F/G/I;Histone H2B type 1-K	HIST1H2BC;HIST1H2BK	-0.0398442	-0.0200478		39S ribosomal protein L33, mitochondrial	MRPL33	0.158078	0.485221		MKI67 FHA domain-interacting nucleolar phosphoprotein	NIFK	0.143524	-0.442164
Sentrin-specific protease 5	SENP5	-0.0437054	0.0847446		ATP-dependent RNA helicase DDX24	DDX24	0.156914	-0.0478603		60S ribosomal protein L18	RPL18	0.142087	-0.00611554
Ribosome production factor 2 homolog	RPF2	-0.0470403	0.0611541		40S ribosomal protein S11	RPS11	0.153676	-0.0157242		60S ribosomal protein L6	RPL6	0.135798	-0.231109
Histone H1.1	HIST1H1A	-0.0489792	-0.514161		Polycomb group RING finger protein 1	PCGF1	0.153676	-0.446639		X-ray repair cross-complementing protein 6	XRCC6	0.135798	-0.191903
Cyclic AMP-dependent transcription factor ATF-1	ATF1	-0.0576319	-0.747972		Guanine nucleotide-binding protein-like 3	GNL3	0.152248	0.234747		Probable rRNA-processing protein EBP2	EBNA1BP2	0.134878	0.021764
Retinitis pigmentosa 9 protein	RP9	-0.0664878	-0.216552		Mitochondrial dicarboxylate carrier	MRPL12;SLC25A10	0.15095	0.372061		28S ribosomal protein S15, mitochondrial	MRPS15	0.127897	-0.526535
Replication factor C subunit 1	RFC1	-0.0675003	-0.0227421		Protein AF-10	MLLT10	0.143393	-0.436178		CCAAT/enhancer-binding protein zeta	CEBPZ	0.127501	0.40305
Host cell factor 2	HCFC2	-0.0693762	1.35975		Peptidyl-prolyl cis-trans isomerase G;Peptidyl-prolyl cis-trans isomerase	PPIG	0.14104	0.407407		Ribosome biogenesis protein BRX1 homolog	BRIX1	0.127501	0.0234683
UV excision repair protein RAD23 homolog B	RAD23B	-0.074988	-0.264253			TOP2B	0.138552	-1.2991		60S ribosomal protein L7a	RPL7A	0.125651	-0.237983
Set1/Ash2 histone methyltransferase complex subunit ASH2	ASH2L	-0.075064	0.745108		Chromobox protein homolog 6	CBX6	0.133958	0.163112		Matrin-3	MATR3	0.121944	-0.873952
Histone H1.0;Histone H1.0, N-terminally processed	H1F0	-0.0766454	-0.188102		DENN domain-containing protein 2D	DENND2D	0.132511	0.750778		Lysine-rich nucleolar protein 1	KNOP1	0.121811	-0.104046
	TOP2B	-0.0771171	-0.971912		WW domain-binding protein 11	WBP11	0.132248	0.200755		Histone H1.0;Histone H1.0, N-terminally processed	H1F0	0.115033	0.123666
Uncharacterized protein C11orf57	C11orf57	-0.0788227	0.10742		DNA topoisomerase 2-beta;DNA topoisomerase 2	TOP2B	0.128689	-1.28412		60S ribosomal protein L14	RPL14	0.113967	-0.758038
Protein SREK1IP1	SREK1IP1	-0.0821024	-0.350651		40S ribosomal protein S9	RPS9	0.128557	-0.264616		40S ribosomal protein S3a	RPS3A	0.1133	-0.650431
Lysine-specific demethylase PHF2	PHF2	-0.0870283	-0.377051		Bromodomain adjacent to zinc finger domain protein 1A	BAZ1A	0.119024	-0.218649		ATPase family AAA domain-containing protein 5	ATAD5	0.112233	-0.154763
Active regulator of SIRT1	RPS19BP1	-0.0887456	0.0965317		ATP-dependent RNA helicase DDX50	DDX50	0.111833	-0.545614		Nuclear apoptosis-inducing factor 1	NAIF1	0.102322	0.0287106
DNA-directed RNA polymerase III subunit RPC4	POLR3D	-0.088807	-1.40706		Mitochondrial ribonuclease P protein 1	TRMT10C	0.107822	0.302173		Histone H1.5	HIST1H1B	0.0978804	0.0574156
40S ribosomal protein S24	RPS24	-0.0907415	-0.147378		Microspherule protein 1	MCRS1	0.105678	0.445621		Nucleophosmin	NPM1	0.0976108	-0.870941
Nucleolar complex protein 4 homolog	NOC4L	-0.093171	0.895613		60S ribosomal protein L23a	RPL23A	0.104471	0.0297002		ATP-dependent RNA helicase DDX18	DDX18	0.0938306	-0.48916
Histone H2A.V;Histone H2A.Z;Histone H2A	H2AFV;H2AFZ	-0.0964989	-0.140873		Chromodomain-helicase-DNA-binding protein 2	CHD2	0.102457	-0.116113		Nucleolar protein of 40 kDa	ZCCHC17	0.0851527	0.12075
LINE-1 retrotransposable element ORF1 protein	L1RE1	-0.096576	1.0036		SWI/SNF-related matrix-associated actin-dependent regulator of chromatin subfamily A member 5	SMARCA5	0.101785	-0.139824		Retinoblastoma-binding protein 5	RBBP5	0.0839282	0.538439
Protein PRRC2C	PRRC2C	-0.0981812	2.64757		UV excision repair protein RAD23 homolog B	RAD23B	0.101112	-0.345784		Ribosome biogenesis regulatory protein homolog	RRS1	0.0791562	-0.145366
High mobility group protein B2	HMGB2	-0.1005	0.842858		Signal recognition particle 14 kDa protein	SRP14	0.100843	0.0592168		Ribosome biogenesis protein NSA2 homolog	NSA2	0.0790196	0.157949
Nucleolar protein 14	NOP14	-0.102976	0.472592		Putative GTP-binding protein 6	GTPBP6	0.09815	-0.0387175		DNA topoisomerase 1	TOP1	0.0775165	-0.116035
Sorting nexin-18	SNX18	-0.110262	0.0812033		Signal recognition particle 9 kDa protein	SRP9	0.0966667	0.134089		Runt-related transcription factor 1	RUNX1	0.0766959	0.21313
DNA-directed RNA polymerase III subunit RPC1	POLR3A	-0.110464	-1.16198		Protein FAM111A	FAM111A	0.0958569	0.638398		Death domain-associated protein 6	DAXX	0.073409	0.322505
Bromodomain-containing protein 7	BRD7	-0.111648	0.101919		DNA mismatch repair protein Msh2	MSH2	0.0900404	0.362778		Nucleolar and coiled-body phosphoprotein 1	NOLC1	0.0716254	-0.900153
Transcription factor A, mitochondrial	TFAM	-0.116489	-0.955144		Transcription elongation factor B polypeptide 3	TCEB3	0.0886844	-0.837635		Histone H1.4	HIST1H1E	0.067501	-0.0333628
DNA polymerase beta	POLB	-0.117881	-1.09053		Histone H1.1	HIST1H1A	0.0854247	-0.0549617		HMG box transcription factor BBX	BBX	0.066537	-0.162493
Histone H2B type 2-E;Histone H2B type 1-B;Histone H2B type 1-J;Histone H2B type 3-B	HIST2H2BE;HIST1H2BB;HIST1H2BJ;HIST3H2BB	-0.11879	0.0717627		Sentrin-specific protease 3	SENP3	0.0846086	-0.048457		Histone H1.3	HIST1H1D	0.066537	-0.0589688
C2 domain-containing protein 5	C2CD5	-0.119479	0.871371		Retinitis pigmentosa 9 protein	RP9	0.0842004	-0.104449		T-complex protein 1 subunit alpha	TCP1	0.0663992	-2.33475
40S ribosomal protein S13	RPS13	-0.119777	0.169668		Histone H1.2	HIST1H1C	0.0835197	0.0579701		Histone H1.2	HIST1H1C	0.0623981	0.0430645
60S ribosomal protein L8	RPL8	-0.121675	-0.426684		DNA polymerase subunit gamma-2, mitochondrial	POLG2	0.0820213	-0.263854		40S ribosomal protein S9	RPS9	0.0549179	-0.872525
Protein ENL	MLLT1	-0.127163	-1.09108		Nucleolar complex protein 3 homolog	NOC3L	0.0798389	1.01721		40S ribosomal protein S15	RPS15	0.0539454	-0.486307
Thyroid transcription factor 1-associated protein 26	CCDC59	-0.129923	-0.770289		Surfeit locus protein 6	SURF6	0.0776532	0.0618453		X-ray repair cross-complementing protein 5	XRCC5	0.0503276	-0.0750032
Protein SDA1 homolog	SDAD1	-0.130476	0.281906		60S ribosomal protein L34	RPL34	0.0760117	0.380508		SWI/SNF-related matrix-associated actin-dependent regulator of chromatin subfamily A member 5	SMARCA5	0.0443242	0.454281
Peptidyl-prolyl cis-trans isomerase G;Peptidyl-prolyl cis-trans isomerase	PPIG	-0.131013	0.526069		MKI67 FHA domain-interacting nucleolar phosphoprotein	NIFK	0.0738202	-0.237303		Serine/threonine-protein kinase TAO1	TAOK1	0.0371713	0.170951
Serine/threonine-protein phosphatase;Serine/threonine-protein phosphatase PP1-gamma catalytic subunit;Serine/threonine-protein phosphatase PP1-alpha catalytic subunit	PPP1CC;PPP1CA	-0.132277	-0.363215		60S ribosomal protein L36a-like	RPL36AL	0.0712135	0.155879		Lethal(3)malignant brain tumor-like protein 3	L3MBTL3	0.0329472	0.0224743
28S ribosomal protein S15, mitochondrial	MRPS15	-0.132325	-0.30627		Ribosomal RNA processing protein 1 homolog B	RRP1B	0.0709388	0.086512		Bromodomain adjacent to zinc finger domain protein 1A	BAZ1A	0.0316775	0.361432
Serine/threonine-protein kinase PRP4 homolog	PRPF4B	-0.134002	0.210139		Pumilio domain-containing protein KIAA0020	KIAA0020	0.0702519	-0.363587		Helicase-like transcription factor	HLTF	0.0315364	0.0133551
DNA topoisomerase 2-beta;DNA topoisomerase 2	TOP2B	-0.144855	-0.956655		39S ribosomal protein L22, mitochondrial	MRPL22	0.0684645	-0.0427837		Ribosome production factor 2 homolog	RPF2	0.0285692	-0.121816
Chromodomain-helicase-DNA-binding protein 2	CHD2	-0.144935	0.159242		60S ribosomal protein L35	RPL35	0.0681893	0.128029		Chromatin complexes subunit BAP18	C17orf49;BAP18;RNASEK-C17orf49	0.0277203	0.814017
Sentrin-specific protease 3	SENP3	-0.153623	0.0652966		Replication initiator 1	REPIN1	0.0677764	-0.391266		rRNA-processing protein FCF1 homolog	FCF1	0.0258793	-0.350909
Heat shock protein beta-8	HSPB8	-0.154506	0.32458		HMG domain-containing protein 4	HMGXB4	0.0659858	0.196733		TBC1 domain family member 10B	TBC1D10B	0.0207689	0.189793
DNA-directed RNA polymerase III subunit RPC2	POLR3B	-0.155518	-1.09925		60S ribosomal protein L36a	RPL36A;RPL36A-HNRNPH2	0.057277	0.0490731		Zinc finger protein 362	ZNF362	0.0190614	0.47892
Serine/threonine-protein phosphatase PP1-beta catalytic subunit;Serine/threonine-protein phosphatase	PPP1CB	-0.156161	0.238298		U3 small nucleolar RNA-interacting protein 2	RRP9	0.0568609	0.819832		Chromodomain-helicase-DNA-binding protein 2	CHD2	0.0169241	0.606726
Transcription initiation factor IIA subunit 1;Transcription initiation factor IIA alpha chain;Transcription initiation factor IIA beta chain	HIST1H4F;GTF2A1	-0.157576	0.0699771		Histone H1.5	HIST1H1B	0.0565835	-0.00268591		Guanine nucleotide-binding protein-like 3	GNL3	0.0166389	0.183582
Charged multivesicular body protein 2a	CHMP2A	-0.15946	-0.984331		Probable ATP-dependent RNA helicase DDX31	DDX31	0.038998	-0.97852		Signal recognition particle subunit SRP68	SRP68	0.0150693	-0.370322
HMG box transcription factor BBX	BBX	-0.161831	1.11597		Core-binding factor subunit beta	CBFB	0.0382957	0.334339		60S ribosomal protein L15;Ribosomal protein L15	RPL15	0.0142124	-0.460429
Putative eukaryotic translation initiation factor 2 subunit 3-like protein;Eukaryotic translation initiation factor 2 subunit 3	EIF2S3L;EIF2S3	-0.163333	0.0220482		Death domain-associated protein 6	DAXX	0.0359054	0.43328		Nucleolar complex protein 2 homolog	NOC2L	0.0100637	0.101247
60S ribosomal protein L23	RPL23	-0.16482	0.567253		NK-tumor recognition protein;Putative peptidyl-prolyl cis-trans isomerase	NKTR	0.031254	-0.555121		Multiple myeloma tumor-associated protein 2	MMTAG2	0.00863031	0.124593
Acidic fibroblast growth factor intracellular-binding protein	FIBP	-0.164965	0.736908		PR domain zinc finger protein 10	PRDM10	0.0280033	0.19131		60S ribosomal protein L13	RPL13	0.00690837	-0.040393
DENN domain-containing protein 2D	DENND2D	-0.165224	0.444137		40S ribosomal protein S13	RPS13	0.0251706	0.109561		40S ribosomal protein S11	RPS11	0.00676478	-0.659517
Myosin regulatory light chain 12A;Myosin regulatory light chain 12B	MYL12A;MYL12B	-0.166519	1.94886		60S ribosomal protein L26-like 1	RPL26L1	0.0246034	0.0415234		60S ribosomal protein L34	RPL34	-0.00210787	0.247198
MPN domain-containing protein	MPND	-0.168723	0.574441		Krueppel-like factor 13	KLF13	0.0213376	-0.100546		RNA-binding protein 39	RBM39;RNPC2	-0.00455166	-0.188677
DNA-directed RNA polymerase III subunit RPC3	POLR3C	-0.170021	-1.57141		Lysine-rich nucleolar protein 1	KNOP1	0.0176369	-0.0789446		Transcription termination factor 1	TTF1	-0.00916129	0.519139
7SK snRNA methylphosphate capping enzyme	MEPCE	-0.181657	0.842939		DNA topoisomerase 1	TOP1	0.0164963	-0.0424568		Protein SCAF11	SCAF11	-0.0121116	-0.248879
CDK5 and ABL1 enzyme substrate 1	CABLES1	-0.188611	0.657091		Ribosome biogenesis regulatory protein homolog	RRS1	0.015783	-0.0294555		Core-binding factor subunit beta	CBFB	-0.0128392	0.378955
Treacle protein	TCOF1	-0.188956	-0.125305		Ubinuclein-2	UBN2	0.0156403	0.086512		Heterogeneous nuclear ribonucleoprotein M	HNRNPM	-0.0136983	0.445833
Ribosomal protein L19;60S ribosomal protein L19	RPL19	-0.192134	-0.324365		Transcription initiation factor TFIID subunit 9B	TAF9B	0.00590296	0.999639		Polynucleotide 5-hydroxyl-kinase NOL9	NOL9	-0.0137274	0.267955
Ubiquitin carboxyl-terminal hydrolase 42	USP42	-0.19413	-0.749499		Histone H2B type 2-E;Histone H2B type 1-B;Histone H2B type 1-J;Histone H2B type 3-B	HIST2H2BE;HIST1H2BB;HIST1H2BJ;HIST3H2BB	0.00432161	-0.704277		Core-binding factor subunit beta	CBFB	-0.0162931	0.369941
WW domain-binding protein 11	WBP11	-0.196227	0.300885		28S ribosomal protein S15, mitochondrial	MRPS15	0.00317044	-0.178747		G patch domain-containing protein 4	GPATCH4	-0.018688	-0.296846
N-acetyltransferase 10	NAT10	-0.197749	0.0297002		Ribonucleases P/MRP protein subunit POP1	POP1	0.00230647	0.585155		Serine/arginine-rich splicing factor 3	SRSF3	-0.0219508	-0.413173
Corepressor interacting with RBPJ 1	CIR1	-0.200084	-0.572008		Protein SREK1IP1	SREK1IP1	0.00129784	-0.0816748		Protein SREK1IP1	SREK1IP1	-0.0290433	-0.144202
Heterogeneous nuclear ribonucleoproteins C1/C2	HNRNPC	-0.200631	1.15368		Nuclear mitotic apparatus protein 1	NUMA1	0.00115369	0.100036		60S ribosomal protein L19	RPL19	-0.0311351	0.00129784
40S ribosomal protein S20	RPS20	-0.201825	0.634779		Leydig cell tumor 10 kDa protein homolog	C19orf53	-0.00465297	-0.207494		Heterogeneous nuclear ribonucleoprotein D0	HNRNPD	-0.0329052	-0.602876
p21-activated protein kinase-interacting protein 1	PAK1IP1	-0.209061	0.622556		Histone H1.3	HIST1H1D	-0.0085226	-0.0411944		60S ribosomal protein L10	RPL10	-0.0334662	-0.213153
DAZ-associated protein 1	DAZAP1	-0.210713	0.392537		DNA helicase INO80	INO80	-0.00855162	0.88096		Corepressor interacting with RBPJ 1	CIR1	-0.0373547	-0.632249
Nucleolar GTP-binding protein 2	GNL2	-0.211231	1.60621		Vacuolar protein-sorting-associated protein 25	VPS25	-0.0086387	-0.788439		60S ribosomal protein L8	RPL8	-0.0377842	-0.360546
La-related protein 7	LARP7	-0.213772	0.0958569		Pyrroline-5-carboxylate reductase 1, mitochondrial;Pyrroline-5-carboxylate reductase	PYCR1	-0.0133051	0.507211		Charged multivesicular body protein 2a	CHMP2A	-0.0417289	0.475396
Cyclin-dependent-like kinase 5	CDK5	-0.216284	0.769518		Nucleolar protein 12	NOL12	-0.0149222	0.140386		60S ribosomal protein L10a	RPL10A	-0.0420111	-0.0469956
Histone H1.4	HIST1H1E	-0.218565	-0.164399		Probable dimethyladenosine transferase	DIMT1	-0.0163223	-0.683507		60S ribosomal protein L7	RPL7	-0.0424271	-0.129592
Ribosomal RNA processing protein 1 homolog A	RRP1	-0.219186	0.00360224		DNA polymerase epsilon subunit 3	POLE3	-0.0194921	-0.730727		Putative 60S ribosomal protein L39-like 5;60S ribosomal protein L39	RPL39P5;RPL39	-0.0512945	-0.205713
DNA-directed RNA polymerases I, II, and III subunit RPABC1	POLR2E	-0.222532	-1.2597		Chromodomain-helicase-DNA-binding protein 7;Chromodomain-helicase-DNA-binding protein 9	CHD7;CHD9	-0.0212625	-0.133432		SWI/SNF-related matrix-associated actin-dependent regulator of chromatin subfamily E member 1	SMARCE1	-0.0549917	-0.637064
DNA-directed RNA polymerase III subunit RPC6	POLR3F	-0.223694	-1.57544		Serine/threonine-protein kinase PRP4 homolog	PRPF4B	-0.0262785	0.0919367		Centrin-2	CETN2	-0.0551565	-0.0368958
Protein FAM133B	FAM133B	-0.223711	-0.453024		Histone H2B type 1-C/E/F/G/I;Histone H2B type 1-K	HIST1H2BC;HIST1H2BK	-0.027322	-0.299099		Sphingosine-1-phosphate lyase 1	SGPL1	-0.0565362	-0.807074
60S ribosomal protein L10a	RPL10A	-0.226696	-0.120153		TFIIH basal transcription factor complex helicase XPD subunit	ERCC2	-0.0299415	-0.853345			RPL10	-0.0600062	-0.215228
Leucine-rich repeat-containing protein 59	LRRC59	-0.229027	-0.146228		Core histone macro-H2A.2	H2AFY2	-0.032979	-0.230871		Importin subunit alpha-4	KPNA3	-0.0625953	-0.293748
Replication factor C subunit 3	RFC3	-0.230533	-0.271148		Chromatin accessibility complex protein 1	CHRAC1	-0.037799	-0.447485		Protein CMSS1	CMSS1	-0.0636655	-0.611535
Threonine aspartase 1;Threonine aspartase subunit alpha;Threonine aspartase subunit beta	TASP1	-0.234822	0.243547		60S ribosomal protein L8	RPL8	-0.0405117	-0.0507265		DNA polymerase subunit gamma-2, mitochondrial	POLG2	-0.0650684	-0.545698
60S ribosomal protein L7	RPL7	-0.235535	-0.15266		Transcription elongation factor B polypeptide 1	TCEB1	-0.0432445	-1.12551		Histone chaperone ASF1A	ASF1A	-0.0653703	1.03365
Mitochondrial ribonuclease P protein 1	TRMT10C	-0.238102	0.416299		1-phosphatidylinositol 4,5-bisphosphate phosphodiesterase delta-3	PLCD3	-0.0437798	1.55714		Leydig cell tumor 10 kDa protein homolog	C19orf53	-0.0655665	-1.00558
Casein kinase II subunit beta	CSNK2B;CSNK2B-LY6G5B-562;CSNK2B-LY6G5B-1181;CSNK2B-LY6G5B--991	-0.239873	-0.112833		ATP-dependent RNA helicase DDX54	DDX54	-0.0466677	-0.346463		U3 small nucleolar RNA-interacting protein 2	RRP9	-0.0679086	0.658189
TAR DNA-binding protein 43	TARDBP	-0.240486	0.352533		Zinc transporter SLC39A7	SLC39A7	-0.0523862	-0.369911		Testis-specific Y-encoded-like protein 5	TSPYL5	-0.0686952	-0.363438
Guanine nucleotide-binding protein subunit beta-2-like 1;Guanine nucleotide-binding protein subunit beta-2-like 1, N-terminally processed	GNB2L1	-0.241219	0.452174		Histone H1.0;Histone H1.0, N-terminally processed	H1F0	-0.0541526	-0.139776		60S ribosomal protein L24	RPL24	-0.0698607	-0.000735962
Vang-like protein 1	VANGL1	-0.241884	0.161049		Chromodomain-helicase-DNA-binding protein 3	CHD3	-0.0545271	0.271904		Chromodomain-helicase-DNA-binding protein 6	CHD6	-0.0707847	0.493852
Charged multivesicular body protein 4b	CHMP4B	-0.248725	-0.71442		Protein max	MAX	-0.0545571	0.0251706		Nucleolin	NCL	-0.0752008	-0.71762
Core histone macro-H2A.2	H2AFY2	-0.248759	-0.322776		Serum response factor-binding protein 1	SRFBP1	-0.0592093	-0.152179		40S ribosomal protein S4, X isoform	RPS4X	-0.075216	-0.783638
DNA-directed RNA polymerase I subunit RPA2	POLR1B	-0.251041	-0.790434		40S ribosomal protein S24	RPS24	-0.0594198	-0.0329642		tRNA-splicing ligase RtcB homolog	RTCB	-0.0783352	-1.76538
Replication factor C subunit 5	RFC5	-0.253773	-0.31233		RNA exonuclease 4	REXO4	-0.0634393	-0.513646		ATP-dependent DNA helicase Q1	RECQL	-0.0832329	-1.04615
ATP-dependent RNA helicase DDX18	DDX18	-0.258253	-0.359879		Rab11 family-interacting protein 1	RAB11FIP1	-0.0733629	-0.727762		Ribosomal RNA processing protein 1 homolog B	RRP1B	-0.084135	0.199625
Charged multivesicular body protein 3	CHMP3	-0.259426	-0.77512		Transcription initiation factor IIA subunit 1;Transcription initiation factor IIA alpha chain;Transcription initiation factor IIA beta chain	HIST1H4F;GTF2A1	-0.0742436	0.55159		Retinitis pigmentosa 9 protein	RP9	-0.0854355	-0.468451
G patch domain-containing protein 4	GPATCH4	-0.260083	-0.483037		ATP-dependent RNA helicase DDX18	DDX18	-0.0765237	-0.513172		Uncharacterized protein C11orf57	C11orf57	-0.0897893	-0.024766
60S ribosomal protein L22	RPL22	-0.260826	-0.386846		Serpin B12	SERPINB12	-0.0787617	-0.588422		Chromobox protein homolog 6	CBX6	-0.0906186	-0.229535
Serine beta-lactamase-like protein LACTB, mitochondrial	LACTB	-0.266732	3.02544		UV excision repair protein RAD23 homolog A	RAD23A	-0.0859254	-0.621666		40S ribosomal protein S8	RPS8	-0.0919711	-0.11915
Replication factor C subunit 2	RFC2	-0.26913	-0.255271		Runt-related transcription factor 2	RUNX2	-0.0870896	-0.115832		Chromatin assembly factor 1 subunit B	CHAF1B	-0.0955429	0.746227
Probable 28S rRNA (cytosine(4447)-C(5))-methyltransferase	NOP2	-0.273692	-0.605332		AP-3 complex subunit delta-1	AP3D1	-0.087902	0.91831		p21-activated protein kinase-interacting protein 1	PAK1IP1	-0.0962367	-0.0519524
T-box transcription factor TBX2	TBX2	-0.275804	-0.381122		Transcription initiation factor TFIID subunit 12	TAF12	-0.0988454	0.831148		Inactive serine/threonine-protein kinase VRK3	VRK3	-0.0988763	1.03548
Methylcrotonoyl-CoA carboxylase subunit alpha, mitochondrial	MCCC1	-0.276625	0.585539		Ribosomal RNA processing protein 1 homolog A	RRP1	-0.106234	0.0396999		Heat shock cognate 71 kDa protein	HSPA8	-0.103116	-0.0702544
DNA-directed RNA polymerase I subunit RPA1;DNA-directed RNA polymerase	POLR1A	-0.279056	-0.85841		Nuclease-sensitive element-binding protein 1;Y-box-binding protein 2	YBX1;YBX2	-0.108503	0.0250288		Probable U3 small nucleolar RNA-associated protein 11	UTP11L	-0.105209	-0.352326
Uncharacterized protein C12orf43	C12orf43	-0.280265	-0.234567		SRSF protein kinase 2;SRSF protein kinase 2 N-terminal;SRSF protein kinase 2 C-terminal	SRPK2	-0.109546	0.970486		Coiled-coil domain-containing protein 137	CCDC137	-0.109156	-1.06329
	DDX24	-0.280562	0.425352		rRNA-processing protein UTP23 homolog	UTP23	-0.110449	-0.275909		ATP-dependent RNA helicase A	DHX9	-0.110526	-0.881986
Replication factor C subunit 4	RFC4	-0.283316	-0.344209		Uncharacterized protein C11orf57	C11orf57	-0.11288	-0.0640575		Heat shock 70 kDa protein 1A/1B	HSPA1A	-0.113583	0.0942361
UV excision repair protein RAD23 homolog A	RAD23A	-0.283509	-0.742482		Protein KRI1 homolog	KRI1	-0.113286	0.305445		Nucleolar protein 56	NOP56	-0.114597	-0.039859
DNA-directed RNA polymerase III subunit RPC8	POLR3H	-0.285935	-1.3531		Nucleolar protein 14	NOP14	-0.114332	0.283211		Probable ribosome biogenesis protein RLP24	RSL24D1	-0.116645	-0.580634
RNA-binding protein 42	RBM42	-0.291186	-0.389111		Bromodomain-containing protein 7	BRD7	-0.117193	0.118094		Runt-related transcription factor 2	RUNX2	-0.117302	0.254957
DNA-directed RNA polymerases I and III subunit RPAC1	POLR1C	-0.296527	-1.21695		Histone H2A.V;Histone H2A.Z;Histone H2A	H2AFV;H2AFZ	-0.11915	-0.131914		Histone-lysine N-methyltransferase 2A;MLL cleavage product N320;MLL cleavage product C180	KMT2A	-0.121487	0.701327
Bromodomain adjacent to zinc finger domain protein 2B	BAZ2B	-0.297644	0.513794		Transcriptional activator protein Pur-alpha	PURA	-0.119369	-0.0415953		60S ribosomal protein L21	RPL21	-0.12312	-0.114223
SWI/SNF-related matrix-associated actin-dependent regulator of chromatin subfamily A member 5	SMARCA5	-0.299578	0.354001		Nucleolar complex protein 4 homolog	NOC4L	-0.120122	0.607768		KH domain-containing, RNA-binding, signal transduction-associated protein 1	KHDRBS1	-0.129197	-1.19717
Kinectin	KTN1	-0.300591	-0.31678		Transcription initiation factor TFIID subunit 3	TAF3	-0.12874	0.678252		Protein FAM133B	FAM133B	-0.129908	-0.264842
Eukaryotic translation initiation factor 2 subunit 1	EIF2S1	-0.303543	0.186501		Probable ATP-dependent RNA helicase DDX41	DDX41	-0.133654	0.427177		N-acylneuraminate cytidylyltransferase	CMAS	-0.132689	-1.36297
40S ribosomal protein S15a	RPS15A	-0.304452	-0.278759		Thyroid transcription factor 1-associated protein 26	CCDC59	-0.136823	-0.208928		Eukaryotic translation initiation factor 6	EIF6	-0.133132	-0.143325
Nuclear cap-binding protein subunit 1	NCBP1	-0.305129	0.515612		Transcription elongation factor B polypeptide 2	TCEB2	-0.137299	-0.972535		60S ribosomal protein L28	RPL28	-0.133337	-0.00403074
Bromodomain adjacent to zinc finger domain protein 1A	BAZ1A	-0.314051	0.257493		40S ribosomal protein S30	FAU	-0.139252	-0.0358602		Charged multivesicular body protein 1b	CHMP1B	-0.133654	0.436695
DNA polymerase epsilon subunit 3	POLE3	-0.31687	-0.0500543		ATP synthase subunit gamma, mitochondrial	ATP5C1	-0.140094	0.0106366		Uncharacterized protein C9orf114	C9orf114	-0.138902	0.0858325
Charged multivesicular body protein 1b	CHMP1B	-0.31766	-0.95744		Heat shock cognate 71 kDa protein	HSPA8	-0.143182	0.241596		Thyroid transcription factor 1-associated protein 26	CCDC59	-0.140873	-0.337667
Band 4.1-like protein 4B	EPB41L4B	-0.319208	-0.0702696		INO80 complex subunit C	INO80C	-0.14417	0.590051		Filamin-B	FLNB	-0.145557	-0.0236657
Ribosomal protein 63, mitochondrial	MRPL57	-0.323859	-0.423836		Transcription initiation factor TFIID subunit 11	TAF11	-0.15319	0.770026		Serine/arginine-rich splicing factor 1	SRSF1	-0.150561	0.55768
ESF1 homolog	ESF1	-0.328399	-0.351479		ADP/ATP translocase 3;ADP/ATP translocase 3, N-terminally processed	SLC25A6	-0.158204	-0.185048		60S ribosomal protein L36a-like	RPL36AL	-0.157946	0.165044
Arginine and glutamate-rich protein 1	ARGLU1	-0.335554	-0.0621283		TATA-box-binding protein;TATA box-binding protein-like protein 2	TBP;TBPL2	-0.160185	0.737687		rRNA/tRNA 2-O-methyltransferase fibrillarin-like protein 1	FBLL1	-0.161347	-0.0416844
Mitochondrial dicarboxylate carrier	SLC25A10;MRPL12	-0.336009	1.0708		Cell growth-regulating nucleolar protein	LYAR	-0.161573	-0.195269		T-box transcription factor TBX3	TBX3	-0.165709	0.217231
40S ribosomal protein S11	RPS11	-0.339546	0.1595		Kinectin	KTN1	-0.16613	-0.282491		rRNA 2-O-methyltransferase fibrillarin	FBL	-0.184703	-0.0186442
S1 RNA-binding domain-containing protein 1	SRBD1	-0.343147	0.821139		Ribosomal protein L19;60S ribosomal protein L19	RPL19	-0.167361	-0.256614		Host cell factor 2	HCFC2	-0.184933	0.884324
Zinc transporter SLC39A7	SLC39A7	-0.347876	-0.0141499		Nuclear factor related to kappa-B-binding protein	NFRKB	-0.169842	0.668301		Nucleolar protein 16	NOP16	-0.185327	-0.54103
Emerin	EMD	-0.352142	-0.25608		Protein SDA1 homolog	SDAD1	-0.169875	0.377401		Host cell factor 1;HCF N-terminal chain 1;HCF N-terminal chain 2;HCF N-terminal chain 3;HCF N-terminal chain 4;HCF N-terminal chain 5;HCF N-terminal chain 6;HCF C-terminal chain 1;HCF C-terminal chain 2;HCF C-terminal chain 3;HCF C-terminal chain 4;HCF C-terminal chain 5;HCF C-terminal chain 6	HCFC1	-0.18641	0.135009
Splicing factor, arginine/serine-rich 19	SCAF1	-0.354723	0.676628		Transcription initiation factor TFIID subunit 1;Transcription initiation factor TFIID subunit 1-like	TAF1;TAF1L	-0.169907	0.874758		Protein dpy-30 homolog	DPY30;LOC84661	-0.191294	0.370388
39S ribosomal protein L36, mitochondrial	MRPL36	-0.358251	-0.138521		Transcription initiation factor TFIID subunit 5	TAF5	-0.170508	0.86758		60S ribosomal protein L18a	RPL18A	-0.193189	-0.628452
40S ribosomal protein S3	RPS3	-0.358768	0.28155		H/ACA ribonucleoprotein complex subunit 1	GAR1	-0.175257	0.247077		LIM and SH3 domain protein 1	LASP1	-0.198626	-0.241475
Importin subunit alpha-5;Importin subunit alpha-5, N-terminally processed	KPNA1	-0.36175	0.453649		Splicing regulatory glutamine/lysine-rich protein 1	SREK1	-0.180642	0.119821		40S ribosomal protein S30	FAU	-0.202356	-0.0559812
Histone H2A type 2-C;Histone H2A type 2-A;Histone H2A type 1-J;Histone H2A type 1-H;Histone H2A.J;Histone H2A type 1;Histone H2A type 1-D;Histone H2A	HIST2H2AC;HIST2H2AA3;HIST1H2AJ;HIST1H2AH;H2AFJ;HIST1H2AG;HIST1H2AD	-0.363976	-0.848427		Ubinuclein-1	UBN1	-0.180741	0.2529		T-box transcription factor TBX2	TBX2	-0.203253	0.358959
Treacle protein	TCOF1	-0.371012	-0.201643		Histone H1.4	HIST1H1E	-0.181984	-0.166033		Band 4.1-like protein 5	EPB41L5	-0.203751	0.03492
rRNA-processing protein FCF1 homolog	FCF1	-0.376807	-0.833902		Transcription initiation factor TFIID subunit 4	TAF4	-0.183982	0.846553		DENN domain-containing protein 2D	DENND2D	-0.205314	0.566961
DNA-directed RNA polymerase III subunit RPC5	POLR3E	-0.380859	-1.47626		Heterogeneous nuclear ribonucleoprotein U-like protein 1	HNRNPUL1	-0.184671	0.281906		Chromodomain-helicase-DNA-binding protein 4	CHD4	-0.206429	0.253263
60S ribosome subunit biogenesis protein NIP7 homolog	NIP7	-0.381461	-0.846247		Transcription initiation factor TFIID subunit 10	TAF10	-0.185064	0.841893		Set1/Ash2 histone methyltransferase complex subunit ASH2	ASH2L	-0.206529	0.828794
Charged multivesicular body protein 1a	CHMP1A	-0.383661	-0.981309		H/ACA ribonucleoprotein complex subunit 4	DKC1	-0.185179	0.231924		40S ribosomal protein S6	RPS6	-0.206595	-0.237558
DNA-directed RNA polymerases I, II, and III subunit RPABC3	POLR2H	-0.393311	-1.08498		Histone H3	HIST2H3PS2	-0.187395	-0.396612		60S ribosomal protein L17	RPL17	-0.207245	-0.440029
Chromodomain-helicase-DNA-binding protein 7	CHD7	-0.401177	0.359296		Leucine-rich repeat-containing protein 59	LRRC59	-0.189911	-0.034707		Charged multivesicular body protein 3	CHMP3	-0.207444	0.675274
Nucleolar protein 12	NOL12	-0.401806	0.27858		Importin subunit alpha-5;Importin subunit alpha-5, N-terminally processed	KPNA1	-0.190092	0.342782		60S ribosomal protein L36a	RPL36A	-0.208844	-0.16524
U3 small nucleolar RNA-interacting protein 2	RRP9	-0.411406	1.98565		28S ribosomal protein S5, mitochondrial	MRPS5	-0.1908	0.538637		60S ribosomal protein L32	RPL32	-0.209595	-0.0783809
60S ribosomal protein L29	RPL29	-0.419855	-0.476197		60S ribosomal protein L10a	RPL10A	-0.191228	-0.103147		BUD13 homolog	BUD13	-0.210463	-0.254479
40S ribosomal protein S23	RPS23	-0.420453	-0.474372		Ubiquitin carboxyl-terminal hydrolase isozyme L5	UCHL5	-0.196707	0.776357		60S ribosomal protein L26	RPL26	-0.211531	-0.29366
Heat shock cognate 71 kDa protein	HSPA8	-0.424843	0.568227		Elongation factor Tu, mitochondrial	TUFM	-0.19808	0.377735		60S ribosomal protein L36	RPL36	-0.213236	-0.553384
Krueppel-like factor 16	KLF16	-0.429284	-1.11585		Uncharacterized protein C1orf226	C1orf226	-0.209495	2.20652		Activator of basal transcription 1	ABT1	-0.213621	-0.289827
Protein SON	SON	-0.429906	0.796764		28S ribosomal protein S7, mitochondrial	MRPS7	-0.210096	0.147958		H/ACA ribonucleoprotein complex subunit 4	DKC1	-0.2163	0.169925
ATP-dependent RNA helicase DDX24	DDX24	-0.433467	0.279174		60S ribosomal protein L7	RPL7	-0.212133	-0.111508		60S ribosomal protein L27	RPL27	-0.216921	0.210763
B-cell lymphoma/leukemia 11B	BCL11B	-0.434227	-0.438561		ESF1 homolog	ESF1	-0.212484	-0.245232		40S ribosomal protein S24	RPS24	-0.219102	-0.30504
Aprataxin	APTX	-0.439442	-1.00329		N-acetyltransferase 10	NAT10	-0.217004	0.0723116		Spermatogenesis-associated serine-rich protein 2	SPATS2	-0.227388	-1.10958
RNA-binding protein 14	RBM14	-0.441164	0.84551		Protein FAM133B	FAM133B	-0.218481	-0.335608		Ubinuclein-2	UBN2	-0.22901	1.09721
SRSF protein kinase 2;SRSF protein kinase 2 N-terminal;SRSF protein kinase 2 C-terminal	SRPK2	-0.448312	1.54937		INO80 complex subunit B	INO80B-WBP1;INO80B	-0.218917	0.477056		Calcineurin-binding protein cabin-1	CABIN1	-0.229839	1.19944
Putative GTP-binding protein 6	GTPBP6	-0.448666	0.313478		PIN2/TERF1-interacting telomerase inhibitor 1	PINX1	-0.220328	-0.142274		Carboxyl-terminal PDZ ligand of neuronal nitric oxide synthase protein	NOS1AP	-0.238272	0.595886
Charged multivesicular body protein 4a	CHMP4A	-0.456128	-0.774923		40S ribosomal protein S2	RPS2	-0.221253	0.471864		Protein HIRA	HIRA;C22orf39	-0.240162	1.23051
Signal recognition particle subunit SRP72	SRP72	-0.45912	1.47218		La-related protein 7	LARP7	-0.22302	0.226139		Serine/arginine repetitive matrix protein 1	SRRM1	-0.241594	-0.756916
U2 small nuclear ribonucleoprotein A	SNRPA1	-0.460568	0.831067		Transcriptional repressor protein YY1	YY1	-0.22516	0.607579		DnaJ homolog subfamily A member 3, mitochondrial	DNAJA3	-0.248708	0.303576
DNA-directed RNA polymerase I subunit RPA12	ZNRD1	-0.460806	-1.08954		Helicase-like transcription factor	HLTF	-0.225869	-0.925358		YTH domain-containing protein 1	YTHDC1	-0.24996	0.853117
Bifunctional polynucleotide phosphatase/kinase;Polynucleotide 3-phosphatase;Polynucleotide 5-hydroxyl-kinase	PNKP	-0.460985	-0.350357		Sorting nexin-18	SNX18	-0.235127	0.419323		Pre-mRNA-processing factor 6	PRPF6	-0.255391	0.189287
Polyadenylate-binding protein 1	PABPC1	-0.463848	0.162855		Actin-related protein 8	ACTR8	-0.235603	0.632268			LOC102288414	-0.259875	-0.139903
Nuclear mitotic apparatus protein 1	NUMA1	-0.468112	0.328032		Mitochondrial 2-oxoglutarate/malate carrier protein	SLC25A11	-0.239038	-0.0199601		40S ribosomal protein S26;Putative 40S ribosomal protein S26-like 1	RPS26;RPS26P11	-0.265795	-0.50746
DNA-directed RNA polymerases I, II, and III subunit RPABC5	POLR2L	-0.470429	-1.24188		Barrier-to-autointegration factor;Barrier-to-autointegration factor, N-terminally processed	BANF1	-0.240981	-0.28214		60S ribosomal protein L29	RPL29	-0.267219	-0.185934
Pumilio domain-containing protein KIAA0020	KIAA0020	-0.480176	-0.122994		Treacle protein	TCOF1	-0.243028	-0.0315037		MPN domain-containing protein	MPND	-0.276031	0.400866
60S ribosomal protein L26	RPL26;KRBA2	-0.480941	-0.660521		Lysine-specific demethylase 2A	KDM2A	-0.253515	-1.83341		60S ribosomal protein L23a	RPL23A	-0.277884	-0.354981
39S ribosomal protein L22, mitochondrial	MRPL22	-0.488755	-0.0156659		DNA damage-binding protein 1	DDB1	-0.254961	0.169925		60S ribosomal protein L13a	RPL13A	-0.279616	-0.451267
Band 4.1-like protein 5	EPB41L5	-0.488836	-0.322072		NF-kappa-B-activating protein	NKAP	-0.256907	0.15549		U3 small nucleolar ribonucleoprotein protein MPP10	MPHOSPH10	-0.285056	0.190299
		-0.489403	-1.11457		YLP motif-containing protein 1	YLPM1	-0.259029	-0.337776		40S ribosomal protein S23	RPS23	-0.289087	-0.20078
Probable ATP-dependent RNA helicase DDX31	DDX31	-0.489848	-0.774009		Transcription initiation factor TFIID subunit 7	TAF7	-0.260031	0.713432		Protein KRI1 homolog	KRI1	-0.293783	0.0590783
Zinc finger protein 22	ZNF22	-0.491004	-0.903279		Transcription factor A, mitochondrial	TFAM	-0.261345	-0.700826		60S ribosomal protein L26-like 1	RPL26L1	-0.294951	-0.273884
pre-rRNA processing protein FTSJ3	FTSJ3	-0.495003	0.377957		Transcription initiation factor TFIID subunit 2	TAF2	-0.263075	0.878215		40S ribosomal protein S17-like;40S ribosomal protein S17	RPS17;RPS17L	-0.295482	-0.219488
60S ribosomal protein L13	RPL13	-0.498179	-0.775836		H/ACA ribonucleoprotein complex subunit 2	NHP2	-0.264183	0.253021		Charged multivesicular body protein 4b	CHMP4B	-0.297396	0.625083
Chromatin accessibility complex protein 1	CHRAC1	-0.502628	-0.0592694		TCF3 fusion partner	TFPT	-0.26472	0.749234		Charged multivesicular body protein 6	CHMP6	-0.303703	0.735782
ELAV-like protein 1	ELAVL1	-0.506332	0.561986		G patch domain-containing protein 8	GPATCH8	-0.271165	0.478506		N-acetyltransferase 10	NAT10	-0.305164	0.642655
E3 ubiquitin-protein ligase RING1	RING1	-0.510745	0.0571383		RuvB-like 1	RUVBL1	-0.271217	0.549916		Charged multivesicular body protein 4c	CHMP4C	-0.308519	0.519844
60S ribosomal protein L13a	RPL13A;RPL13a	-0.510827	-0.423159		Corepressor interacting with RBPJ 1	CIR1	-0.271618	-0.0786094		Nucleolar protein 12	NOL12	-0.309663	-0.258736
G patch domain-containing protein 8	GPATCH8	-0.514532	0.283092		Zinc finger transcription factor Trps1	TRPS1	-0.275577	-0.274215		Ubinuclein-1	UBN1	-0.310432	1.20113
40S ribosomal protein S6	RPS6	-0.51546	-0.598544		Trimethylguanosine synthase	TGS1	-0.275926	0.361993		Signal recognition particle subunit SRP72	SRP72	-0.311363	-0.810941
Heterochromatin protein 1-binding protein 3	HP1BP3	-0.515831	0.65764		H/ACA ribonucleoprotein complex subunit 3	NOP10	-0.277307	0.276913		Putative RNA-binding protein Luc7-like 1	LUC7L	-0.317013	0.0745054
Serine/arginine-rich splicing factor 7	SRSF7	-0.517152	0.721766		Serine/threonine-protein phosphatase;Serine/threonine-protein phosphatase PP1-gamma catalytic subunit;Serine/threonine-protein phosphatase PP1-alpha catalytic subunit	PPP1CC;PPP1CA	-0.279897	-0.595446		Protein LLP homolog	LLPH	-0.31802	-0.500463
40S ribosomal protein SA	RPSA	-0.517461	0.740971		Uncharacterized protein C12orf43	C12orf43	-0.280387	-0.108892		Quinone oxidoreductase PIG3	TP53I3	-0.319352	-0.331064
Nuclear fragile X mental retardation-interacting protein 1	NUFIP1	-0.519197	-0.816621		Tubulin beta-4B chain;Tubulin beta-4A chain	TUBB4B;TUBB4A	-0.28079	-0.563923		Transcriptional activator protein Pur-beta	PURB	-0.319946	-1.4443
Probable ATP-dependent RNA helicase DDX41	DDX41	-0.527928	0.558659		Transcriptional activator protein Pur-beta	PURB	-0.281947	0.00575927		Peptidyl-prolyl cis-trans isomerase;Peptidyl-prolyl cis-trans isomerase G	PPIG	-0.324581	-0.764984
Poly [ADP-ribose] polymerase 2	PARP2	-0.529156	-0.474472		Nucleophosmin	NPM1	-0.284353	-0.546772		Coilin	COIL	-0.328489	0.613909
Protein THEM6	THEM6	-0.544982	-0.385507		RuvB-like 2	RUVBL2	-0.285495	0.503247		H/ACA ribonucleoprotein complex subunit 1	GAR1	-0.331972	0.083792
H/ACA ribonucleoprotein complex subunit 4	DKC1	-0.545803	0.550802		Band 4.1-like protein 4B	EPB41L4B	-0.286797	-0.00298947		Charged multivesicular body protein 4a	CHMP4A	-0.335008	0.627046
Barrier-to-autointegration factor;Barrier-to-autointegration factor, N-terminally processed	BANF1	-0.549641	-0.468531		Transcription initiation factor TFIID subunit 8	TAF8	-0.289457	0.69207		Probable ATP-dependent RNA helicase DHX37	DHX37	-0.340313	0.666757
Round spermatid basic protein 1-like protein	RSBN1L	-0.550317	0.233888		40S ribosomal protein S7	RPS7	-0.289492	-0.635136		Myb-binding protein 1A	MYBBP1A	-0.341775	0.893518
Deoxynucleotidyltransferase terminal-interacting protein 2	DNTTIP2	-0.550803	-0.326317		40S ribosomal protein S3a	RPS3A	-0.290233	-0.615331		40S ribosomal protein S7	RPS7	-0.344941	-1.12743
Importin subunit alpha-7	KPNA6	-0.553405	0.395173		Actin-like protein 6A	ACTL6A	-0.290339	0.553066		Histone acetyltransferase KAT6B	KAT6B	-0.345674	-0.0741525
Histone H3	HIST2H3PS2	-0.554506	-0.258701		60S ribosomal protein L31	RPL31	-0.292864	-0.584609		Charged multivesicular body protein 1a	CHMP1A	-0.345949	0.488721
Transcription elongation factor B polypeptide 3	TCEB3	-0.560047	-0.480901		C2 domain-containing protein 5	C2CD5	-0.29297	1.16871		Threonine aspartase 1;Threonine aspartase subunit alpha;Threonine aspartase subunit beta	TASP1	-0.350173	0.4755
60S ribosomal protein L27a	RPL27A	-0.562964	-0.559664		Transcription initiation factor TFIID subunit 9	TAF9;AK6	-0.2935	0.710261		DNA polymerase subunit gamma-1	POLG	-0.350596	-0.210062
H/ACA ribonucleoprotein complex subunit 1	GAR1	-0.566763	0.467593		B-cell lymphoma/leukemia 11B	BCL11B	-0.295075	0.181421		Mitochondrial dicarboxylate carrier	MRPL12;SLC25A10	-0.351111	0.351854
ATP-dependent RNA helicase DDX54	DDX54	-0.568644	0.846874		60S ribosomal protein L6	RPL6	-0.29573	-0.420897		Uncharacterized protein C12orf43	C12orf43	-0.352658	0.301822
Zinc finger protein 335	ZNF335	-0.570807	4.09263		Actin-related protein 5	ACTR5	-0.304113	0.694657		Band 4.1-like protein 4B	EPB41L4B	-0.356994	0.109427
Nucleosome-remodeling factor subunit BPTF	BPTF	-0.573682	0.867106		Histone H2A type 2-C;Histone H2A type 2-A;Histone H2A type 1-J;Histone H2A type 1-H;Histone H2A.J;Histone H2A type 1-D;Histone H2A type 1;Histone H2A	HIST2H2AC;HIST2H2AA3;HIST1H2AJ;HIST1H2AH;H2AFJ;HIST1H2AD;HIST1H2AG	-0.314679	-1.39278		DnaJ homolog subfamily B member 6	DNAJB6	-0.3574	-0.00122681
Round spermatid basic protein 1	RSBN1	-0.576368	0.143655		Heterogeneous nuclear ribonucleoprotein U-like protein 2	HNRNPUL2;HNRNPUL2-BSCL2	-0.315594	1.32274		High mobility group protein B1;Putative high mobility group protein B1-like 1	HMGB1;HMGB1P1	-0.357566	-2.13739
Peroxiredoxin-4	PRDX4	-0.576949	0.173255		G patch domain-containing protein 4	GPATCH4	-0.316295	-0.358472		DNA-directed RNA polymerases I and III subunit RPAC1	POLR1C	-0.364849	0.0226164
Elongation factor Tu, mitochondrial	TUFM	-0.578758	0.620493		Vang-like protein 1	VANGL1	-0.317319	0.406754		Protein FAM111A	FAM111A	-0.365239	0.081476
Ankyrin repeat domain-containing protein 11	ANKRD11	-0.57934	-0.151186		Chromodomain-helicase-DNA-binding protein 4	CHD4	-0.322614	-0.405509		Cytosolic carboxypeptidase 1	AGTPBP1	-0.3655	0.27858
Transformer-2 protein homolog alpha	TRA2A	-0.584371	0.497638		Emerin	EMD	-0.324654	0.0553345		DNA-directed RNA polymerase I subunit RPA43	TWISTNB	-0.36563	0.184598
H/ACA ribonucleoprotein complex subunit 2	NHP2	-0.584458	0.471448		Threonine aspartase 1;Threonine aspartase subunit alpha;Threonine aspartase subunit beta	TASP1	-0.325395	0.204516		Pre-mRNA-splicing factor CWC25 homolog	CWC25	-0.366225	-1.01505
Uncharacterized protein C2orf47, mitochondrial	C2orf47	-0.587815	0.852718		ADP/ATP translocase 2;ADP/ATP translocase 2, N-terminally processed;ADP/ATP translocase 1	SLC25A5;SLC25A4	-0.325648	-0.422965		Zinc finger transcription factor Trps1	TRPS1	-0.368328	0.446997
Lupus La protein	SSB	-0.589767	0.263996		ATP-dependent RNA helicase DHX36	DHX36	-0.328978	-0.0864308		Nucleolar protein 58	NOP58	-0.368439	0.104471
Small nuclear ribonucleoprotein-associated proteins B and B;Small nuclear ribonucleoprotein-associated protein N	SNRPN;SNRPB	-0.594966	1.08318		Transcription initiation factor TFIID subunit 13	TAF13	-0.331046	0.732139		Bromodomain adjacent to zinc finger domain protein 2B	BAZ2B	-0.368588	0.820322
Zinc finger protein 1 homolog	ZFP1	-0.595555	-1.10436		Transcription initiation factor TFIID subunit 6	TAF6	-0.33219	0.724738		DNA-directed RNA polymerases I and III subunit RPAC2	POLR1D	-0.37301	-0.13895
40S ribosomal protein S3a	RPS3A	-0.595925	-0.652516		Uncharacterized protein C9orf114	C9orf114	-0.332444	-0.08804		60S ribosomal protein L31	RPL31	-0.373178	-0.916371
H/ACA ribonucleoprotein complex subunit 3	NOP10	-0.600905	0.612494		Chromatin target of PRMT1 protein	CHTOP	-0.333916	0.107956			TCOF1	-0.376639	0.154194
DNA ligase 3	LIG3	-0.601934	-0.651722		Probable ATP-dependent RNA helicase DDX27	DDX27	-0.33539	0.0289934		Charged multivesicular body protein 2b	CHMP2B	-0.385149	0.282973
Nucleolar protein 7	NOL7	-0.603161	-0.380484		Ankyrin repeat domain-containing protein 11	ANKRD11	-0.336537	-0.527907		H/ACA ribonucleoprotein complex subunit 2	NHP2	-0.386638	0.066537
Charged multivesicular body protein 2b	CHMP2B	-0.607858	-0.93049		Heterogeneous nuclear ribonucleoprotein D0	HNRNPD	-0.336828	0.17479		La-related protein 7	LARP7	-0.38743	0.464355
Histone deacetylase 2	HDAC2	-0.610984	1.62555		Cyclin-dependent-like kinase 5	CDK5	-0.34907	1.0695		T-box transcription factor TBX6	TBX6	-0.391191	-0.56467
40S ribosomal protein S15	RPS15	-0.612351	-0.658242		Active regulator of SIRT1	RPS19BP1	-0.351958	-0.225076		60S ribosomal protein L3	RPL3	-0.406541	-0.873503
Nucleolar protein 6	NOL6	-0.612726	0.983751		UAP56-interacting factor	FYTTD1	-0.360286	-0.201079		Treacle protein	TCOF1	-0.406541	0.179384
Ribosomal L1 domain-containing protein 1	RSL1D1	-0.615022	0.392317		ATP-dependent RNA helicase DDX3X;ATP-dependent RNA helicase DDX3Y	DDX3X;DDX3Y	-0.362696	-0.627873		Emerin	EMD	-0.413154	0.323543
Ribonuclease P protein subunit p29	POP4	-0.622576	0.491391		Aprataxin	APTX	-0.362918	-1.00979		Transcription initiation factor TFIID subunit 7	TAF7	-0.413173	0.377512
60S ribosomal protein L6	RPL6	-0.623421	-0.331627		Zinc finger and BTB domain-containing protein 2	ZBTB2	-0.365165	-0.350063		Peptidyl-prolyl cis-trans isomerase FKBP3	FKBP3	-0.424494	-0.873318
Small nuclear ribonucleoprotein Sm D1	SNRPD1	-0.624644	1.43659		U2 snRNP-associated SURP motif-containing protein	U2SURP	-0.365723	0.124593		40S ribosomal protein S14	RPS14	-0.424998	-0.674775
DNA damage-binding protein 1	DDB1	-0.625489	0.483983		KRR1 small subunit processome component homolog	KRR1	-0.369371	-0.851573		Nucleolar protein 14	NOP14	-0.425172	0.171591
Chromobox protein homolog 3	CBX3	-0.628296	0.865523		Charged multivesicular body protein 3	CHMP3	-0.369744	-0.424436		Glioma tumor suppressor candidate region gene 2 protein	GLTSCR2	-0.426722	-0.467294
Dynein light chain 1, cytoplasmic	DYNLL1	-0.628452	0.247198		Protein THEM6	THEM6	-0.373271	0.0729976		60S ribosomal protein L35	RPL35	-0.431598	-0.174491
60S ribosomal protein L28	RPL28	-0.631913	-0.404344		Arginine and glutamate-rich protein 1	ARGLU1	-0.376283	0.0989585		Transcriptional repressor CTCF	CTCF	-0.432007	0.893052
Serine/threonine-protein phosphatase PGAM5, mitochondrial	PGAM5	-0.639939	-0.217457		40S ribosomal protein S23	RPS23	-0.380653	-0.374038		Sp110 nuclear body protein	SP110	-0.432396	-0.817104
RNA-binding protein with serine-rich domain 1	RNPS1	-0.640884	0.74192		60S ribosomal protein L13a	RPL13A;RPL13a	-0.387789	-0.404668		ADP-ribosylation factor-like protein 6-interacting protein 4	ARL6IP4	-0.443458	-0.397942
Serine/arginine-rich splicing factor 10;Serine/arginine-rich splicing factor 12	SRSF10;SRSF12	-0.653355	0.65205		60S ribosomal protein L13	RPL13	-0.388828	-0.515295		Small nuclear ribonucleoprotein-associated proteins B and B;Small nuclear ribonucleoprotein-associated protein N	SNRPB;SNRPN	-0.450025	0.197488
Signal recognition particle subunit SRP68	SRP68	-0.653786	1.37501		ATP synthase subunit alpha, mitochondrial	ATP5A1	-0.389621	-0.340971		Transcription initiation factor TFIID subunit 8	TAF8	-0.450912	0.306496
Nucleophosmin	NPM1	-0.658583	0.618427		DNA-directed RNA polymerase I subunit RPA2	POLR1B	-0.390699	-0.850142		Probable ATP-dependent RNA helicase DDX60-like	DDX60L	-0.451425	0.313478
Stress-70 protein, mitochondrial	HSPA9	-0.661433	0.239276		Lupus La protein	SSB	-0.395891	0.270947		Probable ATP-dependent RNA helicase DDX41	DDX41	-0.460231	-0.0472042
N-acylneuraminate cytidylyltransferase	CMAS	-0.663077	-0.267618		Stress-70 protein, mitochondrial	HSPA9	-0.395948	0.0899049		Luc7-like protein 3	LUC7L3	-0.465301	-0.197319
Chromodomain-helicase-DNA-binding protein 6	CHD6	-0.674222	0.175429		Probable ATP-dependent RNA helicase DDX56	DDX56	-0.403809	0.359746		60S ribosomal protein L38	RPL38	-0.468551	-0.328707
Crossover junction endonuclease MUS81	MUS81	-0.675973	1.8694		TATA-binding protein-associated factor 2N	TAF15	-0.405528	-0.668111		Krueppel-like factor 13	KLF13	-0.47335	0.166715
Probable dimethyladenosine transferase	DIMT1	-0.684573	-0.363364		60S ribosomal protein L29	RPL29	-0.410582	-0.479874		Dehydrogenase/reductase SDR family member 2, mitochondrial	DHRS2	-0.473711	-0.349272
ADP/ATP translocase 3;ADP/ATP translocase 3, N-terminally processed;ADP/ATP translocase 1	SLC25A6;SLC25A4	-0.686452	-0.122036		Charged multivesicular body protein 1b	CHMP1B	-0.41523	-0.432669		Signal recognition particle 14 kDa protein	SRP14	-0.477784	-0.615906
NF-kappa-B-activating protein	NKAP	-0.690521	0.244156		DNA-directed RNA polymerases I, II, and III subunit RPABC1	POLR2E	-0.417078	-0.838461		Serine/threonine-protein phosphatase PGAM5, mitochondrial	PGAM5	-0.480156	0.218347
Phosphatidylinositol 5-phosphate 4-kinase type-2 gamma	PIP4K2C	-0.695419	0.845831		pre-rRNA processing protein FTSJ3	FTSJ3	-0.421709	0.290424		Transcription initiation factor TFIID subunit 11	TAF11	-0.483097	0.437228
Pre-mRNA-splicing factor 38B	PRPF38B	-0.69598	-0.387374		CDK5 and ABL1 enzyme substrate 2	CABLES2	-0.423197	1.63747		Protein SDA1 homolog	SDAD1	-0.48455	0.275841
Histone H3.2	HIST2H3A	-0.696284	-0.277621		60S ribosomal protein L27a	RPL27A	-0.42942	-0.369129		Nucleolar protein 7	NOL7	-0.485257	-0.358935
Dual specificity protein kinase CLK3	CLK3	-0.696494	1.21139		Bifunctional lysine-specific demethylase and histidyl-hydroxylase NO66	NO66	-0.430567	0.550113		60S ribosomal protein L37a	RPL37A	-0.485863	-0.317085
Zinc finger protein 320;Zinc finger protein 578;Zinc finger protein 808;Zinc finger protein 91;Putative zinc finger protein 702;Zinc finger protein 525;Zinc finger protein 485;Zinc finger protein 714;Zinc finger protein 679;Zinc finger protein 506;Putative zinc finger protein 735;Zinc finger protein 626;Zinc finger protein 486;Zinc finger protein 701;Zinc finger protein 468;Zinc finger and SCAN d…	ZNF320;ZNF578;ZNF808;ZNF91;ZNF737;ZNF85;ZSCAN21;ZNF525;ZNF92;ZNF100;ZNF254;ZNF702P;ZNF485;ZNF714;ZNF679;ZNF506;ZNF735P;ZNF626;ZNF486;ZNF701;ZNF468;ZNF141;ZNF708;ZNF273;ZNF765;ZNF479;ZNF257;ZNF492;ZNF675;ZNF430;ZNF98;ZNF66;ZNF681;ZNF431;ZNF732;ZNF676;ZNF599;ZNF726;ZNF813;ZNF724P;ZNF728;ZNF860;ZNF493;ZNF816;ZNF28;ZNF251;ZNF888;ZNF761;ZKSCAN7;ZNF107;ZNF43;ZNF229;ZFP62;ZNF845;ZNF729	-0.699255	-0.0387175		Acidic fibroblast growth factor intracellular-binding protein	FIBP	-0.435983	0.870818		Ribosome biogenesis protein WDR12	WDR12	-0.486428	1.01664
Ribonuclease H1	RNASEH1	-0.707242	0.322736		Interleukin enhancer-binding factor 3	ILF3	-0.438913	0.45607		Peroxiredoxin-4	PRDX4	-0.494109	-1.95126
U4/U6.U5 tri-snRNP-associated protein 2	USP39	-0.709222	0.959918		INO80 complex subunit E	INO80E	-0.442203	0.679334		Transcription initiation factor TFIID subunit 10	TAF10	-0.499728	0.403704
Pyrroline-5-carboxylate reductase 1, mitochondrial;Pyrroline-5-carboxylate reductase	PYCR1	-0.709646	0.938173		CDK5 and ABL1 enzyme substrate 1	CABLES1	-0.443831	0.845269		39S ribosomal protein L36, mitochondrial	MRPL36	-0.50179	-0.0928324
Helicase-like transcription factor	HLTF	-0.711063	-0.492322		Histone H3.2	HIST2H3A	-0.446345	-0.764959		Splicing factor U2AF 35 kDa subunit	U2AF1	-0.502955	0.325041
Polyglutamine-binding protein 1	PQBP1	-0.727045	0.713168		rRNA-processing protein FCF1 homolog	FCF1	-0.448725	-0.534955		DNA-directed RNA polymerases I, II, and III subunit RPABC1	POLR2E	-0.503364	0.0220482
Phosphatidylinositol 5-phosphate 4-kinase type-2 alpha	PIP4K2A	-0.734299	0.987103		Small nuclear ribonucleoprotein-associated proteins B and B;Small nuclear ribonucleoprotein-associated protein N	SNRPB;SNRPN	-0.449592	1.28048		Transcription initiation factor TFIID subunit 9B	TAF9B	-0.509225	0.331132
Transformer-2 protein homolog beta	TRA2B	-0.737182	0.315682		Charged multivesicular body protein 4b	CHMP4B	-0.451445	-0.329849		DNA-directed RNA polymerase;DNA-directed RNA polymerase I subunit RPA1	POLR1A	-0.509409	0.425567
Small nuclear ribonucleoprotein Sm D2	SNRPD2	-0.742338	1.31962		Charged multivesicular body protein 2a	CHMP2A	-0.451603	-0.316438		TATA-box-binding protein;TATA box-binding protein-like protein 2	TBP;TBPL2	-0.509512	0.409472
Transcription elongation factor B polypeptide 2	TCEB2	-0.744995	-2.19001		Bifunctional polynucleotide phosphatase/kinase;Polynucleotide 3-phosphatase;Polynucleotide 5-hydroxyl-kinase	PNKP	-0.454486	-0.145478		Chromodomain-helicase-DNA-binding protein 7	CHD7	-0.514656	0.513693
MKI67 FHA domain-interacting nucleolar phosphoprotein	NIFK	-0.745188	0.326652		DNA-directed RNA polymerase I subunit RPA1;DNA-directed RNA polymerase	POLR1A	-0.456504	-0.745599		Transcription initiation factor TFIID subunit 3	TAF3	-0.517214	0.529171
Importin subunit alpha-1	KPNA2;POU2F2	-0.748166	0.151079		Treacle protein	TCOF1	-0.457732	-0.233108		Dolichol-phosphate mannosyltransferase subunit 1	DPM1	-0.524313	-0.320576
ADP/ATP translocase 2;ADP/ATP translocase 2, N-terminally processed	SLC25A5	-0.758599	-0.0515188		Heterogeneous nuclear ribonucleoprotein A0	HNRNPA0	-0.458842	-0.654263		RNA polymerase I-specific transcription initiation factor RRN3	RRN3	-0.526598	0.287354
Putative oxidoreductase GLYR1	GLYR1	-0.760871	-0.162638		39S ribosomal protein L9, mitochondrial	MRPL9	-0.463848	0.122871		Guanine nucleotide-binding protein-like 3-like protein	GNL3L	-0.529677	2.13445
	LIG3	-0.762387	-0.681284		Ribosomal protein 63, mitochondrial	MRPL57	-0.466078	-0.170053		Heterogeneous nuclear ribonucleoprotein F;Heterogeneous nuclear ribonucleoprotein F, N-terminally processed	HNRNPF	-0.531239	-0.587663
Zinc finger CCCH domain-containing protein 18	ZC3H18	-0.765523	0.256407		Band 4.1-like protein 5	EPB41L5	-0.467234	-0.255477		Serine/arginine repetitive matrix protein 2	SRRM2	-0.531552	0.0716254
Protein KRI1 homolog	KRI1	-0.770584	0.818032		Nucleolar MIF4G domain-containing protein 1	NOM1	-0.468352	0.55562		Transcription initiation factor TFIID subunit 9	TAF9;AK6	-0.532741	0.307895
ATP-dependent RNA helicase DDX55	DDX55	-0.771224	0.638862		Putative RNA-binding protein Luc7-like 1	LUC7L	-0.468491	0.038998		40S ribosomal protein S15a	RPS15A	-0.533389	-0.585908
39S ribosomal protein L9, mitochondrial	MRPL9	-0.773023	-0.107244		60S ribosomal protein L22	RPL22	-0.470689	-0.231922		Transcription initiation factor TFIID subunit 4	TAF4	-0.54082	0.615416
Histone deacetylase 1	HDAC1	-0.77554	1.22367		T-box transcription factor TBX2	TBX2	-0.471089	-0.193734		Splicing factor U2AF 65 kDa subunit	U2AF2	-0.542227	0.245374
3-hydroxyacyl-CoA dehydrogenase type-2	HSD17B10	-0.778259	0.524164		60S ribosomal protein L26	RPL26;KRBA2	-0.471449	-0.531469		Tricarboxylate transport protein, mitochondrial	SLC25A1	-0.546667	0.190804
60S ribosomal protein L31	RPL31	-0.783291	-0.148161		SRSF protein kinase 1	SRPK1	-0.473591	0.393306		Something about silencing protein 10	UTP3	-0.549578	0.357045
Mitochondrial 2-oxoglutarate/malate carrier protein	SLC25A11	-0.793482	0.43189		Scaffold attachment factor B2	SAFB2	-0.483359	-0.353671		Signal recognition particle 9 kDa protein	SRP9	-0.552601	-0.739348
Coilin	COIL	-0.795108	-0.0261316		Pre-mRNA-splicing factor SPF27	BCAS2	-0.483803	-0.212233		Probable ATP-dependent RNA helicase DDX56	DDX56	-0.553109	0.0370307
Polycomb group RING finger protein 1	PCGF1	-0.796887	0.494774		Importin subunit alpha-7	KPNA6	-0.486388	0.384713		Nucleolar GTP-binding protein 2	GNL2	-0.553553	0.552279
60S ribosomal protein L36	RPL36	-0.798592	-0.589485		Ubiquitin carboxyl-terminal hydrolase 42	USP42	-0.487055	-0.470249		60S ribosomal protein L23	RPL23	-0.557667	-0.43154
Transcription elongation factor B polypeptide 1	TCEB1	-0.801506	-0.523048		RNA-binding motif protein, X chromosome;RNA-binding motif protein, X chromosome, N-terminally processed	RBMX	-0.48997	-0.367192		Cancer/testis antigen family 45 member A3;Cancer/testis antigen family 45 member A4/A6;Cancer/testis antigen family 45 member A5;Cancer/testis antigen family 45 member A1;Cancer/testis antigen family 45 member A2	CT45A3;CT45A4;CT45A5;CT45A1;CT45A2	-0.56043	-0.46965
Ubiquitin-60S ribosomal protein L40;Ubiquitin;60S ribosomal protein L40;Polyubiquitin-B;Ubiquitin;Polyubiquitin-C;Ubiquitin	UBA52;UBB;RPS27A;UBC	-0.802235	-0.642076		Zinc finger protein 639	ZNF639	-0.49289	-0.480337		Exportin-1	XPO1	-0.564798	1.33365
Casein kinase II subunit alpha 3;Casein kinase II subunit alpha	CSNK2A1;CSNK2A3	-0.802512	0.68921		U2 small nuclear ribonucleoprotein A	SNRPA1	-0.493479	1.2419		60S ribosomal protein L27a	RPL27A	-0.577336	-0.0441516
Zinc finger homeobox protein 3	ZFHX3	-0.802713	-0.388337		Pre-mRNA-splicing factor 38B	PRPF38B	-0.496183	-0.261258		ATP-binding cassette sub-family F member 1	ABCF1	-0.585063	-0.685361
60S ribosomal protein L7-like 1	RPL7L1	-0.80367	2.63392		60S ribosomal protein L18a	RPL18A	-0.496692	-0.557094		Serine/threonine-protein kinase PRP4 homolog	PRPF4B	-0.586644	-0.396536
60S ribosomal protein L18a	RPL18A	-0.812384	-0.323877		Chromatin complexes subunit BAP18	C17orf49;BAP18;RNASEK-C17orf49	-0.500381	0.601316		Serine/arginine-rich splicing factor 2;Serine/arginine-rich splicing factor 8	SRSF2;SRSF8	-0.589008	-0.209612
Peregrin	BRPF1	-0.818961	1.7464		U2 small nuclear ribonucleoprotein B	SNRPB2	-0.501096	1.41797		Serine/arginine-rich splicing factor 7	SRSF7	-0.594683	0.316841
NK-tumor recognition protein;Putative peptidyl-prolyl cis-trans isomerase	NKTR	-0.822197	0.685895		Protein SON	SON	-0.508875	1.8132		Arginine and glutamate-rich protein 1	ARGLU1	-0.599987	-0.0862623
Ras GTPase-activating-like protein IQGAP1	IQGAP1	-0.823652	1.90423		Krueppel-like factor 16	KLF16	-0.511855	-0.758697		Putative RNA-binding protein Luc7-like 2;UPF0562 protein C7orf55	LUC7L2;C7orf55	-0.602504	-0.130839
DNA repair protein XRCC1	XRCC1;FOXH1	-0.826514	-1.06498		Transmembrane and coiled-coil domain-containing protein 1	TMCO1	-0.512637	0.368489		Probable ATP-dependent RNA helicase DDX10	DDX10	-0.602679	0.16877
DNA-binding protein SMUBP-2	IGHMBP2	-0.829024	0.0574156		Non-POU domain-containing octamer-binding protein	NONO	-0.514697	-1.8697		U1 small nuclear ribonucleoprotein 70 kDa	SNRNP70	-0.610059	0.0848807
Neuroguidin	NGDN	-0.836914	-0.156949		39S ribosomal protein L47, mitochondrial	MRPL47	-0.518102	0.263756		Eukaryotic translation initiation factor 2 subunit 1	EIF2S1	-0.61213	-2.84934
WD repeat-containing protein 46	WDR46	-0.842335	0.485015		Pre-mRNA-processing factor 19	PRPF19	-0.521059	-0.251298		Pyrroline-5-carboxylate reductase 1, mitochondrial	PYCR1	-0.616547	0.506907
40S ribosomal protein S7	RPS7	-0.844717	-0.158365		Nuclear fragile X mental retardation-interacting protein 1	NUFIP1	-0.528615	-0.65599		Pre-mRNA-processing factor 19	PRPF19	-0.618185	-0.969396
Small nuclear ribonucleoprotein Sm D3	SNRPD3	-0.854231	0.412511		Charged multivesicular body protein 1a	CHMP1A	-0.533138	-0.509491		Serine/threonine-protein phosphatase PP1-alpha catalytic subunit;Serine/threonine-protein phosphatase	PPP1CA	-0.619404	-1.28722
78 kDa glucose-regulated protein	HSPA5	-0.876625	-0.113926		TAR DNA-binding protein 43	TARDBP	-0.534454	0.556503		Myb/SANT-like DNA-binding domain-containing protein 3	MSANTD3	-0.620313	0.662205
Crossover junction endonuclease EME1	EME1	-0.878613	1.57531		Small nuclear ribonucleoprotein Sm D2	SNRPD2	-0.536168	1.32751		TATA box-binding protein-associated factor RNA polymerase I subunit D	TAF1D	-0.62431	0.691266
RNA polymerase I-specific transcription initiation factor RRN3	RRN3	-0.886993	-0.784334		Transcription factor AP-4	TFAP4	-0.541996	0.714575		Alanine--tRNA ligase, cytoplasmic	AARS	-0.626246	-1.94192
40S ribosomal protein S16	RPS16	-0.89325	-3.02093		Nucleosome-remodeling factor subunit BPTF	BPTF	-0.543762	0.409581		Transcription initiation factor TFIID subunit 1;Transcription initiation factor TFIID subunit 1-like	TAF1;TAF1L	-0.626558	0.698841
	HSPA1A	-0.89518	0.190299		Charged multivesicular body protein 4c	CHMP4C	-0.543888	-0.492444		COMM domain-containing protein 8	COMMD8	-0.629099	0.227248
Serine/arginine-rich splicing factor 6	SRSF6	-0.906575	1.03055		DnaJ homolog subfamily B member 6	DNAJB6	-0.545003	-0.407995		Transcription factor E4F1	E4F1	-0.632696	0.80488
60S ribosomal protein L27	RPL27	-0.912211	-0.674637		DNA-directed RNA polymerase III subunit RPC1	POLR3A	-0.548122	-0.53437		Stress-70 protein, mitochondrial	HSPA9	-0.634845	-0.30818
Serine/arginine-rich splicing factor 2	SRSF2	-0.920325	0.646347		Poly(U)-binding-splicing factor PUF60	PUF60	-0.553426	-0.00544924		Putative GTP-binding protein 6	GTPBP6	-0.635226	0.409581
Prelamin-A/C;Lamin-A/C	LMNA	-0.921581	-0.0706029		DNA ligase 3	LIG3	-0.556075	-0.65765		N-acetyltransferase 10	NAT10	-0.635853	0.467071
DnaJ homolog subfamily B member 6	DNAJB6	-0.927469	-0.364366		Nucleolar protein 4-like	NOL4L	-0.559175	-1.925		Transcription initiation factor TFIID subunit 6	TAF6	-0.648146	0.539134
Serine/arginine-rich splicing factor 1	SRSF1	-0.930545	0.576667		CXXC-type zinc finger protein 5	CXXC5	-0.560536	0.0311128		Microspherule protein 1	MCRS1	-0.649118	1.20389
Histone H4	HIST1H4A	-0.952127	-0.277796		Probable ATP-dependent RNA helicase DHX37	DHX37	-0.567233	0.0805212		Eukaryotic initiation factor 4A-III;Eukaryotic initiation factor 4A-III, N-terminally processed	EIF4A3	-0.653151	-1.38391
Trifunctional enzyme subunit alpha, mitochondrial;Long-chain enoyl-CoA hydratase;Long chain 3-hydroxyacyl-CoA dehydrogenase	HADHA	-0.954054	1.60274		40S ribosomal protein S14	RPS14	-0.567511	-0.784234		Barrier-to-autointegration factor;Barrier-to-autointegration factor, N-terminally processed	BANF1	-0.654808	-0.687172
Bifunctional lysine-specific demethylase and histidyl-hydroxylase MINA	MINA	-0.959991	0.142087		DNA-directed RNA polymerase III subunit RPC7-like	POLR3GL	-0.57424	-0.668318		Protein NipSnap homolog 1	NIPSNAP1	-0.658948	-0.105504
28S ribosomal protein S7, mitochondrial	MRPS7	-0.961142	-0.215228		RNA-binding protein 14	RBM14	-0.575465	-0.972619		Zinc finger homeobox protein 3	ZFHX3	-0.662232	0.907198
Keratin, type I cytoskeletal 18	KRT18	-0.968944	0.371057		Histone H4	HIST1H4A	-0.575615	-0.739396		Probable ATP-dependent RNA helicase DDX27	DDX27	-0.662369	0.284633
Tubulin alpha-1B chain;Tubulin alpha-4A chain	TUBA1B;TUBA4A;KLK9	-0.969848	-0.127415		60S ribosomal protein L28	RPL28	-0.579404	-0.430373		Aspartate aminotransferase, mitochondrial	GOT2	-0.67252	-3.79438
Protein LYRIC	MTDH	-0.971459	-0.296616		40S ribosomal protein S15	RPS15	-0.581627	-0.569993		Serine/threonine-protein kinase TAO2	TAOK2	-0.675742	-0.496224
Probable ATP-dependent RNA helicase DDX27	DDX27	-0.972619	0.661294		60S ribosomal protein L3	RPL3	-0.582296	-0.551839		U2 small nuclear ribonucleoprotein B	SNRPB2	-0.679019	-0.0300004
Putative RNA-binding protein 15B	RBM15B	-0.976106	0.894139		Apoptosis-inducing factor 1, mitochondrial	AIFM1	-0.589073	0.38405		pre-rRNA processing protein FTSJ3	FTSJ3	-0.680891	0.455544
Extended synaptotagmin-2	ESYT2	-0.976191	0.655352			HSPA1A	-0.59231	-0.139077		39S ribosomal protein L22, mitochondrial	MRPL22	-0.688288	-0.708538
Heat shock 70 kDa protein 6;Putative heat shock 70 kDa protein 7	HSPA6;HSPA7	-0.977611	0.307429		Large neutral amino acids transporter small subunit 1	SLC7A5	-0.593921	0.53824		DNA-directed RNA polymerase I subunit RPA2;DNA-directed RNA polymerase	POLR1B	-0.68945	0.304978
Serine/arginine repetitive matrix protein 2	SRRM2	-0.997838	-0.100639		DNA-directed RNA polymerase III subunit RPC2	POLR3B	-0.594291	-0.503875		H/ACA ribonucleoprotein complex subunit 3	NOP10	-0.696634	-0.038273
Serum response factor-binding protein 1	SRFBP1	-0.998097	0.54666		F-box/LRR-repeat protein 6	FBXL6	-0.596078	1.12552		Transcription initiation factor TFIID subunit 5	TAF5	-0.696798	0.606063
Tubulin beta chain;Tubulin beta-2B chain;Tubulin beta-2A chain;Tubulin beta-3 chain	TUBB;TUBB2B;TUBB2A;TUBB3	-0.999596	-0.366578		40S ribosomal protein S6	RPS6	-0.596143	-0.635966		10 kDa heat shock protein, mitochondrial	HSPE1	-0.700451	-3.73341
Large neutral amino acids transporter small subunit 1	SLC7A5	-1.00182	1.01128		Round spermatid basic protein 1-like protein	RSBN1L	-0.599003	0.451541		Cleavage and polyadenylation specificity factor subunit 6	CPSF6	-0.710756	0.4959
Trifunctional enzyme subunit beta, mitochondrial;3-ketoacyl-CoA thiolase	HADHB	-1.01008	1.63849		Importin subunit alpha-1	KPNA2;POU2F2	-0.60463	0.110096		Small nuclear ribonucleoprotein Sm D1	SNRPD1	-0.713497	0.135535
Zinc finger protein 800	ZNF800	-1.01115	0.725349		U3 small nucleolar ribonucleoprotein protein IMP3	IMP3	-0.612946	-0.160556		TATA box-binding protein-associated factor RNA polymerase I subunit B	TAF1B	-0.716576	0.700972
60S acidic ribosomal protein P0;60S acidic ribosomal protein P0-like	RPLP0;RPLP0P6	-1.01753	0.881508		Trifunctional enzyme subunit alpha, mitochondrial;Long-chain enoyl-CoA hydratase;Long chain 3-hydroxyacyl-CoA dehydrogenase	HADHA	-0.613123	1.33634		U4/U6 small nuclear ribonucleoprotein Prp4	PRPF4	-0.718735	0.016211
60S ribosomal protein L7a	RPL7A	-1.01943	-0.973951		Beta-1,3-galactosyltransferase 6	B3GALT6	-0.613697	-0.693201		TATA box-binding protein-associated factor RNA polymerase I subunit A	TAF1A	-0.719994	0.602647
Putative pre-mRNA-splicing factor ATP-dependent RNA helicase DHX15	DHX15	-1.01967	0.388245		DNA-directed RNA polymerase III subunit RPC6	POLR3F	-0.618096	-0.671485		Alpha-crystallin B chain	CRYAB	-0.720041	-1.47654
DNA-directed RNA polymerase I subunit RPA43	TWISTNB	-1.02447	-0.688939		Small nuclear ribonucleoprotein Sm D1	SNRPD1	-0.623487	1.19793		NHP2-like protein 1;NHP2-like protein 1, N-terminally processed	NHP2L1	-0.728957	-0.116238
Probable ATP-dependent RNA helicase DDX56	DDX56	-1.02638	0.84141		Galectin-7	LGALS7	-0.626201	-1.2097		Importin subunit alpha-5;Importin subunit alpha-5, N-terminally processed	KPNA1	-0.732836	0.369383
ATP synthase subunit alpha, mitochondrial	ATP5A1	-1.03171	0.0745054		DNA-directed RNA polymerases I and III subunit RPAC1	POLR1C	-0.631042	-1.01357		RuvB-like 2	RUVBL2	-0.740288	1.21543
Unconventional myosin-Ib	MYO1B	-1.03555	1.54305		DNA-directed RNA polymerase III subunit RPC10	POLR3K	-0.633412	-0.74456		Actin-related protein 5	ACTR5	-0.742965	1.34358
Splicing factor U2AF 35 kDa subunit	U2AF1	-1.03735	0.847436		DNA-directed RNA polymerase I subunit RPA12	ZNRD1	-0.633569	-0.944665		Actin-related protein 8	ACTR8	-0.743956	1.3584
Zinc finger protein 668	ZNF668	-1.05047	0.684908		DNA-directed RNA polymerase III subunit RPC5	POLR3E	-0.635047	-0.68859		Bifunctional purine biosynthesis protein PURH;Phosphoribosylaminoimidazolecarboxamide formyltransferase;IMP cyclohydrolase	ATIC	-0.750688	0.135929
Myb-binding protein 1A	MYBBP1A	-1.0576	0.311387		Charged multivesicular body protein 2b	CHMP2B	-0.638007	-0.609398		INO80 complex subunit D	INO80D	-0.750955	1.26969
Trinucleotide repeat-containing gene 18 protein	TNRC18	-1.0619	0.643394		Protein LYRIC	MTDH	-0.640591	-0.224486		E3 ubiquitin-protein ligase RBBP6	RBBP6	-0.752218	0.504366
Unconventional myosin-Va	MYO5A	-1.06296	0.0630887		Putative RNA-binding protein Luc7-like 2	LUC7L2	-0.647151	0.00920383		ATP synthase subunit gamma;ATP synthase subunit gamma, mitochondrial	ATP5C1	-0.753385	-0.209428
Heterogeneous nuclear ribonucleoprotein F;Heterogeneous nuclear ribonucleoprotein F, N-terminally processed	HNRNPF	-1.06534	0.279293		U3 small nucleolar ribonucleoprotein protein MPP10	MPHOSPH10	-0.650137	0.0233263		Uncharacterized protein C2orf47, mitochondrial	C2orf47	-0.753385	-0.227219
Apoptotic chromatin condensation inducer in the nucleus	ACIN1	-1.06606	0.88924		Round spermatid basic protein 1	RSBN1	-0.653832	0.34426		U3 small nucleolar ribonucleoprotein protein IMP3	IMP3	-0.754091	0.255319
LEM domain-containing protein 2	LEMD2	-1.06755	-0.207461		Trifunctional enzyme subunit beta, mitochondrial;3-ketoacyl-CoA thiolase	HADHB	-0.654672	1.30486		Small nuclear ribonucleoprotein Sm D2	SNRPD2	-0.759332	0.0716254
28S ribosomal protein S22, mitochondrial	MRPS22	-1.07179	2.65228		78 kDa glucose-regulated protein	HSPA5	-0.655012	-0.365555		40S ribosomal protein S13	RPS13	-0.762852	-0.769895
Splicing factor U2AF 65 kDa subunit	U2AF2	-1.07236	0.738119		Small nuclear ribonucleoprotein Sm D3	SNRPD3	-0.656126	1.27417		Actin-like protein 6A	ACTL6A	-0.765253	1.01528
ATP-dependent RNA helicase A	DHX9	-1.0737	0.851599		Serine/arginine-rich splicing factor 11	SRSF11	-0.659859	0.23585		DNA-directed RNA polymerases I, II, and III subunit RPABC3	POLR2H	-0.76788	-0.0936789
U5 small nuclear ribonucleoprotein 40 kDa protein	SNRNP40	-1.08669	0.238542		DNA-directed RNA polymerases I, II, and III subunit RPABC3	POLR2H	-0.666485	-0.798743		Mitochondrial ribonuclease P protein 1	TRMT10C	-0.769059	-0.4455
Ribosome-binding protein 1	RRBP1	-1.09117	-2.30379		60S ribosomal protein L14	RPL14	-0.666691	-0.825261		Farnesyl pyrophosphate synthase	FDPS	-0.776726	-0.918851
Tubulin beta-4B chain;Tubulin beta-4A chain	TUBB4B;TUBB4A	-1.0912	-0.514862		Histone deacetylase complex subunit SAP18	SAP18	-0.675074	2.30247		Nucleolar MIF4G domain-containing protein 1	NOM1	-0.784359	0.699196
Protein AATF	AATF	-1.09369	-0.364719		40S ribosomal protein S15a	RPS15A	-0.676503	0.0654344		Transcriptional repressor protein YY1	YY1	-0.786771	1.1001
40S ribosomal protein S14	RPS14	-1.10284	0.0543623		U3 small nucleolar ribonucleoprotein protein IMP4	IMP4	-0.677287	-0.170232		NF-kappa-B-activating protein	NKAP	-0.787518	-0.311059
Polycomb protein SUZ12	SUZ12	-1.10563	0.588229		Luc7-like protein 3	LUC7L3	-0.680475	0.20389		Complement component 1 Q subcomponent-binding protein, mitochondrial	C1QBP	-0.789636	-0.676665
Myelin expression factor 2	MYEF2	-1.11073	0.931078		Serine palmitoyltransferase 1	SPTLC1	-0.681191	-0.616813		Alpha-aminoadipic semialdehyde dehydrogenase	ALDH7A1	-0.801305	-1.94109
A-kinase anchor protein 17A	AKAP17A	-1.11591	1.57928		Glioma tumor suppressor candidate region gene 2 protein	GLTSCR2	-0.68133	-0.560302		LEM domain-containing protein 2	LEMD2	-0.803343	-0.215898
CCAAT/enhancer-binding protein zeta	CEBPZ	-1.12111	2.36311		Mediator of RNA polymerase II transcription subunit 19	MED19	-0.681654	-0.446482		RuvB-like 1	RUVBL1	-0.811928	1.18263
Nucleolar MIF4G domain-containing protein 1	NOM1	-1.12564	1.09417		X-ray repair cross-complementing protein 5	XRCC5	-0.684689	-0.303953		Nucleolar protein 10	NOL10	-0.813094	0.748375
60S ribosomal protein L18	RPL18	-1.12768	-1.12428		Zinc finger protein 22	ZNF22	-0.688636	-0.56672		Neuroblast differentiation-associated protein AHNAK	AHNAK	-0.813525	-2.56081
Small subunit processome component 20 homolog	UTP20	-1.12778	-0.733267		DNA-directed RNA polymerase III subunit RPC3	POLR3C	-0.690428	-0.745745		Extended synaptotagmin-1	ESYT1	-0.816723	-3.58843
40S ribosomal protein S9	RPS9	-1.12809	0.599794		60S ribosomal protein L36	RPL36	-0.692059	-0.642369		Ubiquitin carboxyl-terminal hydrolase isozyme L5	UCHL5	-0.817409	1.38714
Caspase activity and apoptosis inhibitor 1	CAAP1	-1.13698	1.54947		UPF0568 protein C14orf166	C14orf166	-0.695466	-0.553447		HLA class I histocompatibility antigen, A-29 alpha chain;HLA class I histocompatibility antigen, A-74 alpha chain;HLA class I histocompatibility antigen, A-66 alpha chain;HLA class I histocompatibility antigen, A-43 alpha chain;HLA class I histocompatibility antigen, A-34 alpha chain;HLA class I histocompatibility antigen, A-26 alpha chain;HLA class I histocompatibility antigen, A-25 alpha chain;…	HLA-A;HLA-C	-0.820718	-0.265362
TAF6-like RNA polymerase II p300/CBP-associated factor-associated factor 65 kDa subunit 6L	TAF6L	-1.13711	-0.241833		Keratin, type I cytoskeletal 18	KRT18	-0.701975	0.57289		Neuroguidin	NGDN	-0.826745	0.281906
Heat shock protein beta-1	HSPB1	-1.13949	-1.02248		Charged multivesicular body protein 4a	CHMP4A	-0.706747	-0.607287		DNA damage-binding protein 2	DDB2	-0.83123	0.22367
U1 small nuclear ribonucleoprotein A	SNRPA	-1.1399	0.984334		DNA repair protein XRCC1	XRCC1;FOXH1	-0.71248	-1.01806		INO80 complex subunit C	INO80C	-0.832257	1.32106
BCL-6 corepressor	BCOR	-1.14076	-0.300857		DNA-directed RNA polymerase III subunit RPC8	POLR3H	-0.713876	-0.741493		INO80 complex subunit E	INO80E	-0.832514	1.31898
Probable ATP-dependent RNA helicase DDX46	DDX46	-1.14258	0.252295		7SK snRNA methylphosphate capping enzyme	MEPCE	-0.714397	1.34432		Cyclic AMP-dependent transcription factor ATF-1;cAMP-responsive element modulator	ATF1;CREM	-0.840242	1.08141
Pre-mRNA-processing factor 40 homolog A	PRPF40A	-1.14743	0.728661		Serine protease 23	PRSS23	-0.714468	-0.816139		Pescadillo homolog	PES1	-0.845132	0.490981
Menin	MEN1	-1.14861	1.34085		Cyclic AMP-responsive element-binding protein 1	CREB1	-0.715391	0.289834		DNA mismatch repair protein Msh2	MSH2	-0.853345	-0.649752
60S ribosomal protein L3	RPL3	-1.15075	-0.546435		Nucleolar protein 7	NOL7	-0.719376	-0.311972		U4/U6 small nuclear ribonucleoprotein Prp3	PRPF3	-0.858515	0.258459
Pre-mRNA-processing factor 6	PRPF6	-1.16214	0.486766		RRP12-like protein	RRP12	-0.720255	0.866473		Dynein light chain 1, cytoplasmic;Dynein light chain 2, cytoplasmic	DYNLL1;DYNLL2	-0.859876	0.125387
Zinc finger protein 276	ZNF276	-1.16417	1.08794		Activator of basal transcription 1	ABT1	-0.728885	-0.54353		DNA mismatch repair protein Msh6	MSH6	-0.86247	-0.293005
Serine/arginine-rich splicing factor 3	SRSF3	-1.1643	1.07998		Interleukin enhancer-binding factor 2	ILF2	-0.730632	0.262313		Transcription initiation factor TFIID subunit 12	TAF12	-0.862838	0.269512
Cysteine-rich secretory protein LCCL domain-containing 2	CRISPLD2	-1.16592	-0.786273		Tubulin alpha-1B chain;Tubulin alpha-1C chain;Tubulin alpha-4A chain	TUBA1B;TUBA1C;TUBA4A;KLK9	-0.736341	-0.349511		TCF3 fusion partner	TFPT	-0.866752	1.42395
Uncharacterized protein C9orf114	C9orf114	-1.16893	0.656817		X-ray repair cross-complementing protein 6	XRCC6	-0.749014	-0.362585		Round spermatid basic protein 1	RSBN1	-0.872367	0.757109
60S ribosomal protein L5	RPL5	-1.17971	1.16266		Prelamin-A/C;Lamin-A/C	LMNA	-0.751854	-0.485014		INO80 complex subunit B	INO80B;INO80B-WBP1	-0.874746	1.19352
RNA-binding protein 28	RBM28	-1.18171	0.507414		Coiled-coil domain-containing protein 86	CCDC86	-0.758184	-0.402474		Importin subunit alpha-1	KPNA2	-0.879781	-0.112428
Actin-like protein 6A	ACTL6A	-1.19133	1.27178		Zinc finger and BTB domain-containing protein 25	ZBTB25	-0.766186	-0.463211		Cleavage and polyadenylation specificity factor subunit 5	NUDT21	-0.88071	-0.165467
AP-2 complex subunit mu	AP2M1	-1.19783	0.212507		DNA-directed RNA polymerase III subunit RPC4	POLR3D	-0.76702	-0.83542		Large neutral amino acids transporter small subunit 1	SLC7A5	-0.887633	-0.403237
Probable ATP-dependent RNA helicase DDX23	DDX23	-1.20045	0.33514		Transcription factor E4F1	E4F1	-0.774602	-0.420318		Probable ATP-dependent RNA helicase DDX47	DDX47	-0.889182	0.245131
DNA helicase INO80	INO80	-1.20174	1.80091		Pescadillo homolog	PES1	-0.774873	0.271545		AP-2 complex subunit mu	AP2M1	-0.902632	-0.174214
INO80 complex subunit C	INO80C	-1.20264	1.37161		Nucleolar protein 10	NOL10	-0.775219	0.067088		Protein AATF	AATF	-0.904197	0.53097
KRR1 small subunit processome component homolog	KRR1	-1.20786	0.044604		Dynein light chain 1, cytoplasmic	DYNLL1	-0.775318	0.301822		Round spermatid basic protein 1-like protein	RSBN1L	-0.922237	0.831877
Putative RNA-binding protein 15	RBM15	-1.20913	1.04886		Myb-binding protein 1A	MYBBP1A	-0.778655	0.0313952		Zinc finger protein 212	ZNF212	-0.923496	0.981049
U5 small nuclear ribonucleoprotein 200 kDa helicase	SNRNP200	-1.22776	0.734135		Ubiquitin-40S ribosomal protein S27a;Ubiquitin;40S ribosomal protein S27a	RPS27A	-0.781926	-0.842361		RRP12-like protein	RRP12	-0.928896	-0.0873961
Zinc finger protein 512	ZNF512	-1.23443	0.554933		Ribosome biogenesis protein BOP1	BOP1	-0.783613	1.00856		40S ribosomal protein S25	RPS25	-0.929885	-0.502464
60S ribosomal protein L9	RPL9	-1.23688	0.328032		Probable global transcription activator SNF2L2;Transcription activator BRG1	SMARCA4;SMARCA2	-0.784433	1.34596		Serine/arginine-rich splicing factor 11	SRSF11	-0.934538	0.87798
DNA-directed RNA polymerase, mitochondrial	POLRMT	-1.24951	1.36927		Cyclic AMP-dependent transcription factor ATF-1	ATF1	-0.794708	-0.0223757		ADP/ATP translocase 2;ADP/ATP translocase 2, N-terminally processed;ADP/ATP translocase 3;ADP/ATP translocase 3, N-terminally processed;ADP/ATP translocase 1	SLC25A5;SLC25A6;SLC25A4	-0.935227	-0.363085
Cullin-4A;Cullin-4B	CUL4A;CUL4B	-1.25226	0.0392788		Coilin	COIL	-0.805535	-0.0369106		60S ribosomal protein L22	RPL22	-0.935807	-0.373252
60S ribosomal protein L14	RPL14	-1.25384	-0.739396		Heterogeneous nuclear ribonucleoprotein A3	HNRNPA3	-0.807553	-0.46335		Stress-induced-phosphoprotein 1	STIP1	-0.935835	-2.67355
T-box transcription factor TBX3	TBX3	-1.25691	-1.66296		Desmoplakin	DSP	-0.816113	-1.47786		Splicing regulatory glutamine/lysine-rich protein 1	SREK1	-0.938957	0.182057
RNA exonuclease 4	REXO4	-1.26195	0.521553		Phosphatidylinositol 5-phosphate 4-kinase type-2 beta	PIP4K2B	-0.817003	1.19409		TATA box-binding protein-associated factor RNA polymerase I subunit C	TAF1C	-0.940922	0.969896
4F2 cell-surface antigen heavy chain	SLC3A2	-1.26889	1.06509		Serine/arginine-rich splicing factor 3	SRSF3	-0.818681	0.706199		Glutathione S-transferase omega-1	GSTO1	-0.947139	-2.41827
Ubiquitin carboxyl-terminal hydrolase isozyme L5	UCHL5	-1.27118	1.75052		Zinc finger homeobox protein 3	ZFHX3	-0.82521	-0.0858641		Vang-like protein 1	VANGL1	-0.948336	0.815985
A-kinase anchor protein 8-like	AKAP8L	-1.27146	0.134484		A-kinase anchor protein 17A	AKAP17A	-0.829178	1.44239		DNA helicase INO80	INO80	-0.950564	1.6872
Actin-related protein 5	ACTR5	-1.27498	1.55729		40S ribosomal protein S5;40S ribosomal protein S5, N-terminally processed	RPS5	-0.835368	1.192		Translation initiation factor eIF-2B subunit delta	EIF2B4	-0.951652	-0.307144
Actin-related protein 8	ACTR8	-1.2816	1.5474		Deoxynucleotidyltransferase terminal-interacting protein 1	DNTTIP1	-0.845546	0.96547		Transforming growth factor beta regulator 1	TBRG1	-0.962519	0.960512
RuvB-like 1	RUVBL1	-1.28528	1.50493		Ribosome biogenesis protein WDR12	WDR12	-0.846376	0.967316		Serine/arginine-rich splicing factor 6;Serine/arginine-rich splicing factor 4	SRSF6;SRSF4	-0.970526	0.230326
116 kDa U5 small nuclear ribonucleoprotein component	EFTUD2	-1.28571	0.663117		Transcription factor Sp1	SP1	-0.848921	-0.0902192		Pre-mRNA-processing-splicing factor 8	PRPF8	-0.972591	-0.0726345
5-3 exoribonuclease 2	XRN2	-1.28937	0.863938		LEM domain-containing protein 2	LEMD2	-0.854779	-0.455277		Cyclic AMP-responsive element-binding protein 1	CREB1	-0.987388	0.963548
DnaJ homolog subfamily A member 1	DNAJA1	-1.29938	-0.374318		Ribosomal protein L34;39S ribosomal protein L34, mitochondrial	MRPL34	-0.855092	-0.54924		40S ribosomal protein S18	RPS18	-0.991915	-0.380221
Pre-mRNA-processing-splicing factor 8	PRPF8	-1.30233	0.73127		Matrin-3	MATR3	-0.85807	0.461948		U3 small nucleolar ribonucleoprotein protein IMP4	IMP4	-0.993235	-0.29366
RuvB-like 2	RUVBL2	-1.31244	1.43087		Heterogeneous nuclear ribonucleoprotein R	HNRNPR	-0.858306	0.393855		Nuclease-sensitive element-binding protein 1	YBX1	-1.00355	-1.36576
Replication protein A 70 kDa DNA-binding subunit;Replication protein A 70 kDa DNA-binding subunit, N-terminally processed	RPA1	-1.32193	2.46498			CALM2;CALM1;CALM3	-0.861631	-2.2837		BTB/POZ domain-containing protein 2	BTBD2	-1.00935	1.02162
Tyrosyl-DNA phosphodiesterase 1	TDP1	-1.32847	-1.10045		Putative ATP-dependent RNA helicase DHX33	DHX33	-0.865201	-0.515295		Zinc transporter SLC39A7	SLC39A7	-1.01202	-0.896737
Mortality factor 4-like protein 1	MORF4L1	-1.32974	0.237564		Heterogeneous nuclear ribonucleoprotein H;Heterogeneous nuclear ribonucleoprotein H, N-terminally processed	HNRNPH1	-0.867568	0.318461		DnaJ homolog subfamily A member 2	DNAJA2	-1.02119	-0.703736
INO80 complex subunit E	INO80E	-1.33083	1.5149				-0.869385	-0.784185		Transcription factor 7-like 2	TCF7L2	-1.02298	1.18897
Probable ATP-dependent RNA helicase DHX37	DHX37	-1.33643	0.880019		Casein kinase II subunit beta	CSNK2B;CSNK2B-LY6G5B-562;CSNK2B-LY6G5B-1181;CSNK2B-LY6G5B--991	-0.875937	1.00985		Krueppel-like factor 16	KLF16	-1.02909	0.738379
F-box/LRR-repeat protein 6	FBXL6	-1.3407	2.38078		Putative pre-mRNA-splicing factor ATP-dependent RNA helicase DHX15	DHX15	-0.87803	0.660746		Keratin, type I cytoskeletal 18	KRT18	-1.03688	-0.712244
Importin subunit alpha-4	KPNA3	-1.35509	0.328147		Probable ATP-dependent RNA helicase DDX23	DDX23	-0.887393	0.134352		Centrin-3	CETN3	-1.03952	-0.0137857
Polynucleotide 5-hydroxyl-kinase NOL9	NOL9	-1.35535	-1.45676		60S ribosomal protein L9	RPL9	-0.891937	0.522759		Nucleolar complex protein 4 homolog	NOC4L	-1.04225	0.197111
Nuclear factor related to kappa-B-binding protein	NFRKB	-1.35646	1.87212		Caspase activity and apoptosis inhibitor 1	CAAP1	-0.894081	1.34925		Probable ATP-dependent RNA helicase DDX23	DDX23	-1.06187	0.197111
28S ribosomal protein S26, mitochondrial	MRPS26	-1.36788	0.928655		Tuftelin-interacting protein 11	TFIP11	-0.895475	0.782325		26S proteasome non-ATPase regulatory subunit 7	PSMD7	-1.0723	3.53593
TCF3 fusion partner	TFPT	-1.36877	1.36008		Ribosome-binding protein 1	RRBP1	-0.904332	-2.66237		CAD protein;Glutamine-dependent carbamoyl-phosphate synthase;Aspartate carbamoyltransferase;Dihydroorotase	CAD	-1.07826	-3.17553
Histone-lysine N-methyltransferase 2B	KMT2B	-1.37153	0.915636		60S ribosomal protein L11	RPL11	-0.923496	0.693052		Nuclear factor related to kappa-B-binding protein	NFRKB	-1.08048	1.59627
Ubiquitin carboxyl-terminal hydrolase 36	USP36	-1.37243	0.0507455		KH domain-containing, RNA-binding, signal transduction-associated protein 1	KHDRBS1	-0.924426	-0.907928		RNA-binding protein 8A	RBM8A	-1.0889	-1.07215
Transcriptional repressor protein YY1;Transcription factor YY2	YY1;YY2	-1.37273	1.35902		Enhancer of rudimentary homolog	ERH	-0.924974	0.723165		Elongation factor Tu, mitochondrial	TUFM	-1.0965	-0.51513
SRSF protein kinase 1	SRPK1	-1.37393	0.961105		60S ribosomal protein L7a	RPL7A	-0.925029	-1.05583		U5 small nuclear ribonucleoprotein 40 kDa protein	SNRNP40;DKFZp434D199	-1.10008	0.193961
Activator of basal transcription 1	ABT1	-1.38105	-0.143086		Pre-mRNA-splicing factor CWC25 homolog	CWC25	-0.932031	-1.35491		Inosine-5-monophosphate dehydrogenase 2	IMPDH2	-1.10473	-1.35387
General transcription factor 3C polypeptide 1	GTF3C1	-1.39783	1.65576		60S ribosomal protein L27	RPL27	-0.956208	-0.496407		Dihydropyrimidinase-related protein 2	DPYSL2	-1.12233	-1.72342
Chromodomain-helicase-DNA-binding protein 4	CHD4	-1.39863	0.5065		AP-2 complex subunit mu	AP2M1	-0.959907	-0.516078		Poly(U)-binding-splicing factor PUF60	PUF60	-1.12413	0.539035
60S acidic ribosomal protein P2	RPLP2	-1.40259	0.831877		DnaJ homolog subfamily C member 13	DNAJC13	-0.961957	-0.133955		DNA damage-binding protein 1	DDB1	-1.13198	-0.0109046
Importin subunit alpha-3	KPNA4	-1.4058	-0.0493524		Heterogeneous nuclear ribonucleoprotein F;Heterogeneous nuclear ribonucleoprotein F, N-terminally processed	HNRNPF	-0.967589	0.555129		14-3-3 protein gamma;14-3-3 protein gamma, N-terminally processed	YWHAG	-1.16547	-1.11039
60S ribosomal protein L11	RPL11	-1.40622	0.348459		U4/U6 small nuclear ribonucleoprotein Prp4	PRPF4	-0.968464	-0.0756264		40S ribosomal protein S16	RPS16	-1.17488	-0.612946
Desmoglein-1	DSG1	-1.41054	-2.68446		Protein AATF	AATF	-0.97673	0.0714881		RNA 3-terminal phosphate cyclase-like protein	RCL1	-1.17827	0.0798389
40S ribosomal protein S18	RPS18	-1.41427	-0.947167		40S ribosomal protein S3	RPS3	-0.980625	1.42686		Putative pre-mRNA-splicing factor ATP-dependent RNA helicase DHX15	DHX15	-1.19413	-0.295836
Pre-mRNA-splicing factor CWC25 homolog	CWC25	-1.415	-1.45158		RNA-binding protein with serine-rich domain 1	RNPS1	-0.980825	1.02984		Mitotic checkpoint protein BUB3	BUB3	-1.23179	-0.736052
Ribosome biogenesis protein BMS1 homolog	BMS1	-1.42655	0.016211		Guanine nucleotide-binding protein subunit beta-2-like 1;Guanine nucleotide-binding protein subunit beta-2-like 1, N-terminally processed	GNB2L1	-0.981793	1.68446		Aspartate--tRNA ligase, cytoplasmic	DARS	-1.25922	-1.8138
Vesicle transport through interaction with t-SNAREs homolog 1B	VTI1B	-1.42985	-0.502117		Vesicle transport through interaction with t-SNAREs homolog 1B	VTI1B	-0.98819	0.154454		Ubiquitin-40S ribosomal protein S27a;Ubiquitin;40S ribosomal protein S27a;Polyubiquitin-B;Ubiquitin;Polyubiquitin-C;Ubiquitin	RPS27A;UBC;UBB	-1.27094	-1.95523
INO80 complex subunit B	INO80B-WBP1;INO80B	-1.43432	1.19717		Serrate RNA effector molecule homolog	SRRT	-0.990567	1.80244		Polypyrimidine tract-binding protein 1	PTBP1	-1.2875	-1.7731
E3 ubiquitin-protein ligase TRIP12	TRIP12	-1.4344	0.693766		Poly(rC)-binding protein 1	PCBP1	-0.992575	0.367707		Spectrin alpha chain, non-erythrocytic 1	SPTAN1	-1.29414	-2.04269
Histone-lysine N-methyltransferase EHMT1	EHMT1	-1.4387	2.87307		ATP-dependent RNA helicase A	DHX9	-0.993867	0.743386		ATP-dependent RNA helicase DDX1	DDX1	-1.30347	-1.61675
Nucleolar complex protein 2 homolog	NOC2L	-1.44658	1.93134		60S ribosomal protein L18	RPL18	-1.01197	-1.14564		Proteasome subunit beta type-6	PSMB6	-1.30725	0.511873
Glioma tumor suppressor candidate region gene 2 protein	GLTSCR2	-1.45162	0.0313952		Complement component 1 Q subcomponent-binding protein, mitochondrial	C1QBP	-1.02348	0.469573		Elongation factor 1-beta	EEF1B2	-1.31402	-2.36997
U1 small nuclear ribonucleoprotein 70 kDa	SNRNP70	-1.4532	0.550802		Neuroguidin	NGDN	-1.04225	0.0629506		Heat shock protein beta-1	HSPB1	-1.32189	-1.0061
Desmoplakin	DSP	-1.45902	-2.54145		Heterogeneous nuclear ribonucleoprotein A1;Heterogeneous nuclear ribonucleoprotein A1, N-terminally processed;Heterogeneous nuclear ribonucleoprotein A1-like 2	HNRNPA1;HNRNPA1L2	-1.0468	-1.19317		Ribosome biogenesis protein BMS1 homolog	BMS1	-1.33632	0.371392
Pre-rRNA-processing protein TSR1 homolog	TSR1	-1.48169	0.762306		40S ribosomal protein S20	RPS20	-1.04719	1.62733		U5 small nuclear ribonucleoprotein 200 kDa helicase	SNRNP200	-1.33672	-0.254083
Heterogeneous nuclear ribonucleoprotein M	HNRNPM	-1.49277	0.666938		Heat shock protein beta-1	HSPB1	-1.05191	-0.65599		5-3 exoribonuclease 2	XRN2	-1.338	-0.262261
Unconventional myosin-Ic	MYO1C	-1.50623	1.39835		YTH domain-containing protein 1	YTHDC1	-1.05977	0.948676		Ras-related protein Rab-1B;Ras-related protein Rab-1A;Putative Ras-related protein Rab-1C	RAB1B;RAB1A;RAB1C	-1.34942	-1.61339
FACT complex subunit SSRP1	SSRP1	-1.5107	-1.02565		Probable ATP-dependent RNA helicase DDX46	DDX46	-1.06284	0.246712		TAR DNA-binding protein 43	TARDBP	-1.35646	-0.0173148
Vimentin	VIM	-1.52558	-2.32822		Putative helicase MOV-10	MOV10	-1.06954	1.76099		Vesicle-associated membrane protein-associated protein A	VAPA	-1.35916	-2.82562
U4/U6 small nuclear ribonucleoprotein Prp4	PRPF4	-1.52812	0.0749164		40S ribosomal protein S19	RPS19	-1.09154	1.4471		Nuclear cap-binding protein subunit 1	NCBP1	-1.369	0.154454
RNA 3-terminal phosphate cyclase-like protein	RCL1	-1.53099	-0.22238		Testis-specific Y-encoded-like protein 5	TSPYL5	-1.10042	-1.18561		Caspase activity and apoptosis inhibitor 1	CAAP1	-1.37714	1.2731
Polypyrimidine tract-binding protein 1	PTBP1	-1.53174	1.12048		Heat shock 70 kDa protein 6;Putative heat shock 70 kDa protein 7	HSPA6;HSPA7	-1.11472	-0.65034		Proteasome activator complex subunit 1	PSME1	-1.3924	-2.28062
Cold-inducible RNA-binding protein	CIRBP	-1.53692	1.1932		Casein kinase II subunit alpha;Casein kinase II subunit alpha 3	CSNK2A1;CSNK2A3	-1.11654	1.16137		Nucleolar complex protein 3 homolog	NOC3L	-1.41031	0.647268
Probable ATP-dependent RNA helicase DDX47	DDX47	-1.53948	-0.653083		FACT complex subunit SSRP1	SSRP1	-1.12479	-1.28796		40S ribosomal protein S19	RPS19	-1.45115	-0.202107
Putative RNA-binding protein Luc7-like 2	LUC7L2	-1.54776	0.856388		FACT complex subunit SPT16	SUPT16H	-1.13109	-1.01109		26S protease regulatory subunit 10B	PSMC6	-1.4665	-2.25278
Zinc finger protein 638	ZNF638	-1.55254	2.49395		Phosphatidylinositol 5-phosphate 4-kinase type-2 alpha	PIP4K2A	-1.15682	1.24647		116 kDa U5 small nuclear ribonucleoprotein component	EFTUD2	-1.46933	-0.439931
Nucleolar protein 10	NOL10	-1.55355	-0.22053		Serine/threonine-protein phosphatase PGAM5, mitochondrial	PGAM5	-1.16249	0.844948		Perilipin-3	PLIN3	-1.47177	-1.83712
Survival motor neuron protein	SMN1	-1.55665	0.0457225		Ribosome biogenesis protein BMS1 homolog	BMS1	-1.17078	-0.149841		60S acidic ribosomal protein P1	RPLP1	-1.4804	-1.77833
Myc-associated zinc finger protein	MAZ	-1.56299	1.86243		Phosphatidylinositol 5-phosphate 4-kinase type-2 gamma	PIP4K2C	-1.17163	1.49692		Cyclin-dependent-like kinase 5	CDK5	-1.48072	1.41824
FACT complex subunit SPT16	SUPT16H	-1.56307	-0.763269		40S ribosomal protein SA	RPSA	-1.17312	1.1279		Heat shock 70 kDa protein 6;Putative heat shock 70 kDa protein 7	HSPA6;HSPA7	-1.48952	-0.758721
Luc7-like protein 3	LUC7L3	-1.59579	1.0633		Guanine nucleotide-binding protein-like 3-like protein	GNL3L	-1.17965	-0.966658		Dolichyl-diphosphooligosaccharide--protein glycosyltransferase subunit 1	RPN1	-1.50853	-0.487217
Synaptotagmin-7	SYT7	-1.60261	-1.35034		Heterogeneous nuclear ribonucleoproteins A2/B1	HNRNPA2B1	-1.18544	-0.76518		High mobility group protein B2	HMGB2	-1.514	-1.99074
INO80 complex subunit D	INO80D	-1.60691	1.27995		Unconventional myosin-Ib	MYO1B	-1.19133	1.51864		Vesicle-trafficking protein SEC22b	SEC22B	-1.52454	-2.23304
SAFB-like transcription modulator	SLTM	-1.60709	2.59216		U1 small nuclear ribonucleoprotein A	SNRPA	-1.19215	1.32769		Prohibitin	PHB	-1.52782	-2.45482
Uncharacterized protein KIAA1522	KIAA1522	-1.60797	1.15995		Something about silencing protein 10	UTP3	-1.19387	0.0677764		DnaJ homolog subfamily A member 1	DNAJA1	-1.5302	-1.16952
Calmodulin-like protein 5	CALML5	-1.61268	-3.19245		Tubulin beta chain;Tubulin beta-2B chain;Tubulin beta-2A chain	TUBB;TUBB2B;TUBB2A	-1.19558	-0.703267		Leucine-rich repeat-containing protein 59	LRRC59	-1.53504	-2.30629
60S ribosomal protein L32	RPL32	-1.61653	-1.57514		RNA-binding protein FUS	FUS	-1.20055	-1.18324		Prolyl 4-hydroxylase subunit alpha-1	P4HA1	-1.53872	-0.522654
40S ribosomal protein S2	RPS2	-1.61781	1.63036		Peptidyl-prolyl cis-trans isomerase B	PPIB	-1.20506	-1.98896		Guanine nucleotide-binding protein subunit beta-2-like 1;Guanine nucleotide-binding protein subunit beta-2-like 1, N-terminally processed	GNB2L1	-1.53944	-0.353745
Nucleolin	NCL	-1.62251	1.60895		Nuclear cap-binding protein subunit 1	NCBP1	-1.20739	1.38477		Heterogeneous nuclear ribonucleoprotein K	HNRNPK	-1.55237	-1.82342
PR domain zinc finger protein 10	PRDM10	-1.62393	1.7062		DNA-directed RNA polymerase I subunit RPA43	TWISTNB	-1.20963	-0.611998		Serrate RNA effector molecule homolog	SRRT	-1.56944	1.1477
RNA-binding protein 25	RBM25	-1.65599	0.466236		39S ribosomal protein L19, mitochondrial	MRPL19	-1.22011	2.21562		DNA replication licensing factor MCM7	MCM7	-1.58567	-2.07285
RNA-binding protein 12B	RBM12B	-1.69409	2.20185		Tyrosyl-DNA phosphodiesterase 1	TDP1	-1.22888	-1.05334		Phosphate carrier protein, mitochondrial	SLC25A3	-1.59166	-2.70284
General transcription factor 3C polypeptide 2	GTF3C2	-1.69858	1.20257		RNA polymerase I-specific transcription initiation factor RRN3	RRN3	-1.23943	-0.522364		60S ribosomal protein L9	RPL9	-1.61184	-3.12885
60S ribosomal protein L15;Ribosomal protein L15	RPL15	-1.69923	-1.12737		Pre-mRNA-processing factor 40 homolog A	PRPF40A	-1.24322	1.2181		Transforming protein RhoA	RHOA;RHOC	-1.62251	-3.90591
Heterogeneous nuclear ribonucleoprotein A/B	HNRNPAB	-1.69998	1.53267		39S ribosomal protein L24, mitochondrial	MRPL24	-1.2514	0.714927		ERO1-like protein alpha	ERO1L	-1.62398	-1.67863
40S ribosomal protein S17	RPS17	-1.71634	-0.906467		60S ribosomal protein L15;Ribosomal protein L15	RPL15	-1.25202	-1.37864		Putative eukaryotic translation initiation factor 2 subunit 3-like protein;Eukaryotic translation initiation factor 2 subunit 3	EIF2S3L;EIF2S3	-1.63343	-1.92934
Microspherule protein 1	MCRS1	-1.71895	1.89196		Small subunit processome component 20 homolog	UTP20	-1.26656	-0.690172		Acidic fibroblast growth factor intracellular-binding protein	FIBP	-1.63612	1.5368
Apoptosis-inducing factor 1, mitochondrial	AIFM1	-1.73284	0.161823		RNA 3-terminal phosphate cyclase-like protein	RCL1	-1.26854	-0.155775		Septin-7	SEPT7	-1.64806	-3.54096
Putative RNA-binding protein Luc7-like 1	LUC7L	-1.74599	0.96266		RNA-binding protein EWS	EWSR1	-1.27816	-1.34703		DNA-(apurinic or apyrimidinic site) lyase;DNA-(apurinic or apyrimidinic site) lyase, mitochondrial	APEX1	-1.65635	-1.87811
Eukaryotic initiation factor 4A-III;Eukaryotic initiation factor 4A-III, N-terminally processed	EIF4A3	-1.74671	0.135272		Polynucleotide 5-hydroxyl-kinase NOL9	NOL9	-1.28606	-1.25801		Ubiquitin-like modifier-activating enzyme 1	UBA1	-1.65726	-0.267948
Periodic tryptophan protein 1 homolog	PWP1	-1.74846	-1.36364		DnaJ homolog subfamily A member 1	DNAJA1	-1.30361	-0.951178		Early growth response protein 3	EGR3	-1.65954	1.86358
General transcription factor 3C polypeptide 4	GTF3C4	-1.77098	1.04166		Serine/arginine-rich splicing factor 7	SRSF7	-1.30836	1.54967		40S ribosomal protein S5;40S ribosomal protein S5, N-terminally processed	RPS5	-1.68906	-0.39352
Protein SCAF11	SCAF11	-1.78269	3.47197		Calmodulin-like protein 5	CALML5	-1.31312	-1.37068		Citrate synthase;Citrate synthase, mitochondrial	CS	-1.69064	-0.811169
Peptidyl-prolyl cis-trans isomerase B	PPIB	-1.80244	-2.46937		Thyroid hormone receptor-associated protein 3	THRAP3	-1.33403	1.32723		ATP-dependent 6-phosphofructokinase, liver type	PFKL	-1.6912	-1.7771
Heterogeneous nuclear ribonucleoprotein U-like protein 1	HNRNPUL1	-1.8223	1.65737		Periodic tryptophan protein 1 homolog	PWP1	-1.33457	-1.6246		Kinectin	KTN1	-1.69264	-1.52379
DnaJ homolog subfamily C member 9	DNAJC9	-1.82736	1.92239		PAX3- and PAX7-binding protein 1	PAXBP1	-1.34979	1.16601		ADP-ribosylation factor 4	ARF4	-1.69301	-1.99011
Exosome complex component RRP40	EXOSC3	-1.83043	0.761626		Peptidyl-prolyl cis-trans isomerase;Peptidyl-prolyl cis-trans isomerase H	PPIH	-1.35159	0.201508		Peroxisomal multifunctional enzyme type 2;(3R)-hydroxyacyl-CoA dehydrogenase;Enoyl-CoA hydratase 2	HSD17B4	-1.72514	-2.76405
40S ribosomal protein S25	RPS25	-1.85794	-1.97841		Desmoglein-1	DSG1	-1.35362	-1.18584		Isocitrate dehydrogenase [NAD] subunit alpha, mitochondrial	IDH3A	-1.7281	-0.172945
Bifunctional lysine-specific demethylase and histidyl-hydroxylase NO66	NO66	-1.87832	0.56589		60S acidic ribosomal protein P0;60S acidic ribosomal protein P0-like	RPLP0;RPLP0P6	-1.35827	1.17957		Lupus La protein	SSB	-1.73245	-1.61892
U3 small nucleolar ribonucleoprotein protein IMP4	IMP4	-1.87949	0.757365		14-3-3 protein zeta/delta	YWHAZ	-1.37467	-2.57605		CDK5 and ABL1 enzyme substrate 1	CABLES1	-1.73336	1.64492
U3 small nucleolar ribonucleoprotein protein IMP3	IMP3	-1.88119	0.793272		Splicing factor 3B subunit 2	SF3B2	-1.4207	0.987394		Tubulin beta-3 chain	TUBB3	-1.75579	-1.4657
U3 small nucleolar ribonucleoprotein protein MPP10	MPHOSPH10	-1.90083	1.17069		40S ribosomal protein S16	RPS16	-1.42484	0.956131		Tubulin beta-6 chain	TUBB6	-1.7598	-1.64593
Ribonucleases P/MRP protein subunit POP1	POP1	-1.91354	2.39591		40S ribosomal protein S10;Putative 40S ribosomal protein S10-like	RPS10;RPS10P5	-1.42989	0.83463		60S ribosomal protein L5	RPL5	-1.76778	-2.59719
Dolichyl-diphosphooligosaccharide--protein glycosyltransferase subunit STT3B	STT3B	-1.92906	2.26526		Actin, alpha skeletal muscle;Actin, alpha cardiac muscle 1;Actin, gamma-enteric smooth muscle;Actin, aortic smooth muscle	ACTA1;ACTC1;ACTG2;ACTA2	-1.44469	0.506196		Plectin	PLEC	-1.77093	-1.08568
Beta-1,3-galactosyltransferase 6	B3GALT6	-1.9295	-0.182295		Bcl-2-associated transcription factor 1	BCLAF1	-1.45032	1.51228		40S ribosomal protein S3	RPS3	-1.77532	-0.958589
60S ribosomal protein L4	RPL4	-1.92983	-1.46841		A-kinase anchor protein 8-like	AKAP8L	-1.45064	1.18897		Threonine--tRNA ligase, cytoplasmic	TARS	-1.78841	-2.32402
POZ-, AT hook-, and zinc finger-containing protein 1	PATZ1	-1.93346	0.402613		Pre-mRNA-processing factor 6	PRPF6	-1.46658	0.915636		40S ribosomal protein S12	RPS12	-1.78991	-2.2361
Galectin-7	LGALS7	-1.93473	-1.27628		Heparan sulfate 2-O-sulfotransferase 1	HS2ST1	-1.46773	-2.21632		Actin-related protein 3	ACTR3	-1.80803	-2.4467
Interleukin enhancer-binding factor 3	ILF3	-1.93484	2.30865		Zinc finger protein 770	ZNF770	-1.47871	-1.48774		Lamin-B1	LMNB1	-1.83233	-1.38945
YTH domain-containing protein 1	YTHDC1	-1.93633	1.10252		Peptidyl-prolyl cis-trans isomerase A;Peptidyl-prolyl cis-trans isomerase A, N-terminally processed;Peptidyl-prolyl cis-trans isomerase	PPIA	-1.497	-4.17979		Septin-2	SEPT2	-1.84871	-1.72685
Protein polybromo-1	PBRM1	-1.93644	2.48689		60S ribosomal protein L4	RPL4	-1.49871	-1.85434		Ran-specific GTPase-activating protein	RANBP1	-1.86454	-2.50496
Zinc finger protein 770	ZNF770	-1.95937	-0.925604		U5 small nuclear ribonucleoprotein 200 kDa helicase	SNRNP200	-1.50251	1.00741		Tubulin alpha-1B chain;Tubulin alpha-4A chain	TUBA1B;TUBA4A	-1.86965	-1.69027
Interleukin enhancer-binding factor 2	ILF2	-1.95971	1.8955		40S ribosomal protein S17	RPS17	-1.50725	-0.135412		Poly(rC)-binding protein 1	PCBP1	-1.89164	-1.46701
RRP12-like protein	RRP12	-1.96387	2.06133		Cleavage and polyadenylation specificity factor subunit 5	NUDT21	-1.52127	-0.992288		40S ribosomal protein S2	RPS2	-1.90255	-2.93302
Heterogeneous nuclear ribonucleoprotein D0	HNRNPD	-1.96691	1.89771		U1 small nuclear ribonucleoprotein 70 kDa	SNRNP70	-1.52558	1.00497		Transcription factor Sp1	SP1	-1.90374	1.85862
Methyl-CpG-binding domain protein 2	MBD2	-1.97313	3.20796		40S ribosomal protein S18	RPS18	-1.52957	-0.192826		ATP synthase subunit alpha, mitochondrial	ATP5A1	-1.91419	-1.60182
Protein-glutamine gamma-glutamyltransferase E;Protein-glutamine gamma-glutamyltransferase E 50 kDa catalytic chain;Protein-glutamine gamma-glutamyltransferase E 27 kDa non-catalytic chain	TGM3	-1.98188	-1.18135		Unconventional myosin-Ic	MYO1C	-1.53705	1.52777		Tubulin beta-4B chain	TUBB4B	-1.91512	-1.64955
Actin, cytoplasmic 1;Actin, cytoplasmic 1, N-terminally processed;Actin, cytoplasmic 2;Actin, cytoplasmic 2, N-terminally processed	ACTB;ACTG1	-1.99925	0.28155		Synaptotagmin-7	SYT7	-1.5433	-1.03602		Isocitrate dehydrogenase [NADP] cytoplasmic	IDH1	-1.9179	-1.20666
Y-box-binding protein 3	YBX3	-2.00451	2.04778		Splicing factor 3B subunit 1	SF3B1	-1.55334	0.835762		Proliferating cell nuclear antigen	PCNA	-1.95814	-1.7472
Putative ATP-dependent RNA helicase DHX33	DHX33	-2.01386	0.447421		60S ribosomal protein L32	RPL32	-1.55538	-1.54027		C2 domain-containing protein 5	C2CD5	-1.96917	1.6854
RNA-binding protein 39	RBM39	-2.02011	1.21083		116 kDa U5 small nuclear ribonucleoprotein component	EFTUD2	-1.57936	1.15075		T-complex protein 1 subunit gamma	CCT3	-1.97319	-1.96567
Cilia- and flagella-associated protein 20	CFAP20	-2.03339	0.925316		Myosin-9	MYH9	-1.58022	0.423632		Trifunctional enzyme subunit beta, mitochondrial;3-ketoacyl-CoA thiolase	HADHB	-1.98028	-0.456504
Serine/arginine-rich splicing factor 9	SRSF9	-2.04388	1.06605		Bromodomain-containing protein 9	BRD9	-1.61109	-0.46905		Transcription factor AP-4	TFAP4	-1.98479	2.02882
40S ribosomal protein S5;40S ribosomal protein S5, N-terminally processed	RPS5	-2.04478	0.838347		Methylcrotonoyl-CoA carboxylase subunit alpha, mitochondrial	MCCC1	-1.61449	1.41164		Small nuclear ribonucleoprotein Sm D3	SNRPD3	-1.99551	1.47093
Splicing regulatory glutamine/lysine-rich protein 1	SREK1	-2.06371	1.72255		Serine/arginine-rich splicing factor 2	SRSF2	-1.63022	1.36194		Tubulin alpha-1A chain	TUBA1A	-2.0194	-1.9306
Coiled-coil domain-containing protein 86	CCDC86	-2.06431	0.653977		60S acidic ribosomal protein P2	RPLP2	-1.63653	1.72801		14-3-3 protein theta	YWHAQ	-2.02087	-3.90013
A-kinase anchor protein 8	AKAP8	-2.06594	-0.255219		RNA-binding protein 45	RBM45	-1.63711	0.258579		Tropomyosin alpha-4 chain	TPM4	-2.03375	-3.03257
Splicing factor 3B subunit 2	SF3B2	-2.07917	1.48965		Pre-mRNA-processing-splicing factor 8	PRPF8	-1.64048	1.00043		Cathepsin D;Cathepsin D light chain;Cathepsin D heavy chain	CTSD	-2.03718	-2.72147
Heterogeneous nuclear ribonucleoprotein H;Heterogeneous nuclear ribonucleoprotein H, N-terminally processed	HNRNPH1	-2.08878	0.755571		Serine/Arginine-related protein 53	RSRC1	-1.66009	0.0909889		Actin-related protein 2/3 complex subunit 2	ARPC2	-2.0389	-2.16146
Matrin-3	MATR3	-2.09413	1.52542		Crooked neck-like protein 1	CRNKL1	-1.66456	0.760689		Translocon-associated protein subunit alpha	SSR1	-2.06994	-2.01724
Heterogeneous nuclear ribonucleoprotein Q	SYNCRIP	-2.11766	1.78639		Serine/arginine-rich splicing factor 10	SRSF10	-1.7143	1.95784		Actin-related protein 2	ACTR2	-2.07698	-2.02638
SWI/SNF-related matrix-associated actin-dependent regulator of chromatin subfamily E member 1	SMARCE1	-2.12255	1.61259		Serine beta-lactamase-like protein LACTB, mitochondrial	LACTB	-1.71952	2.96955		Adenylyl cyclase-associated protein 1;Adenylyl cyclase-associated protein	CAP1	-2.08326	-1.43312
Transcriptional repressor CTCF	CTCF	-2.14995	2.53896		Transformer-2 protein homolog beta	TRA2B	-1.72447	1.86691		Prohibitin-2	PHB2	-2.08369	-2.17788
Myosin-9	MYH9	-2.15168	0.907429		Polyadenylate-binding protein 1;Polyadenylate-binding protein 3	PABPC1;PABPC3	-1.72471	1.75937		Multifunctional protein ADE2;Phosphoribosylaminoimidazole-succinocarboxamide synthase;Phosphoribosylaminoimidazole carboxylase	PAICS	-2.08467	-1.69881
Ribonuclease P protein subunit p30	RPP30	-2.18817	3.01999		39S ribosomal protein L20, mitochondrial	MRPL20	-1.73001	-0.861998		Tubulin beta chain	TUBB	-2.08602	-1.82613
ATP synthase subunit gamma, mitochondrial	ATP5C1	-2.20178	2.03555		Apoptotic chromatin condensation inducer in the nucleus	ACIN1	-1.73514	1.90639		Casein kinase II subunit alpha	CSNK2A1	-2.12017	-1.06073
Death domain-associated protein 6	DAXX	-2.2041	2.08865		28S ribosomal protein S22, mitochondrial	MRPS22	-1.77458	1.2122		Calmodulin	CALM2;CALM1	-2.16968	-2.15746
Heterogeneous nuclear ribonucleoprotein H3	HNRNPH3	-2.21304	1.36048		Unconventional myosin-Va	MYO5A	-1.77952	1.89817		Plasminogen activator inhibitor 1 RNA-binding protein	SERBP1	-2.18115	-2.09567
Splicing factor 3B subunit 1	SF3B1	-2.21987	1.06433		Heterogeneous nuclear ribonucleoprotein L	HNRNPL	-1.79691	0.989066		Transketolase	TKT	-2.20936	-2.05691
Pyruvate carboxylase, mitochondrial	PC	-2.23453	2.87423		Alpha-enolase	ENO1	-1.80017	-1.97472		Eukaryotic translation initiation factor 3 subunit B	EIF3B	-2.2464	-2.41212
Heterogeneous nuclear ribonucleoprotein U-like protein 2	HNRNPUL2;HNRNPUL2-BSCL2	-2.25092	3.26959		Actin, cytoplasmic 1;Actin, cytoplasmic 1, N-terminally processed;Actin, cytoplasmic 2;Actin, cytoplasmic 2, N-terminally processed	ACTB;ACTG1	-1.81401	0.294077		Cytoplasmic dynein 1 heavy chain 1	DYNC1H1	-2.24872	-1.52616
Cell division cycle 5-like protein	CDC5L	-2.25574	1.52622		Dual specificity protein kinase CLK3	CLK3	-1.82184	1.20839		40S ribosomal protein S20	RPS20	-2.25718	-0.394885
28S ribosomal protein S27, mitochondrial	MRPS27	-2.25981	1.48574		U4/U6.U5 tri-snRNP-associated protein 2	USP39	-1.83903	1.04089		Clathrin heavy chain 1	CLTC	-2.29279	-2.02139
Nucleoside diphosphate kinase;Nucleoside diphosphate kinase B;Putative nucleoside diphosphate kinase	NME1-NME2;NME2;NME2P1	-2.27139	-2.9066		40S ribosomal protein S25	RPS25	-1.8706	-1.90525		Heat shock 70 kDa protein 4	HSPA4	-2.33199	-4.0187
Unconventional myosin-Id	MYO1D	-2.30814	-0.781058		Cullin-4A;Cullin-4B	CUL4A;CUL4B	-1.8947	-0.437565		Methylcrotonoyl-CoA carboxylase beta chain, mitochondrial	MCCC2	-2.34124	2.33156
Transcription activator BRG1;Probable global transcription activator SNF2L2	SMARCA4;SMARCA2	-2.31115	2.14284		U5 small nuclear ribonucleoprotein 40 kDa protein	SNRNP40	-1.89529	0.820649		Coronin-1C;Coronin	CORO1C	-2.34512	-2.02968
Junction plakoglobin	JUP	-2.31854	-1.78071		Transformer-2 protein homolog alpha	TRA2A	-1.899	1.56643		Alpha-actinin-4	ACTN4	-2.34527	-2.19588
THO complex subunit 4	ALYREF	-2.32446	2.24218		Serine/arginine-rich splicing factor 5	SRSF5	-1.90682	1.07032		Elongation factor 1-gamma	EEF1G	-2.34799	-1.22563
Heterogeneous nuclear ribonucleoprotein A0	HNRNPA0	-2.343	1.2979		RNA-binding protein 8A	RBM8A	-1.91072	1.84928		Protein arginine N-methyltransferase 1	PRMT1	-2.3586	-2.83867
ATP synthase subunit O, mitochondrial	ATP5O	-2.34769	1.93667		Protein S100-A8;Protein S100-A8, N-terminally processed	S100A8	-1.91833	-2.13467		26S protease regulatory subunit 6A	PSMC3	-2.38669	-1.29789
Pre-mRNA-processing factor 19	PRPF19	-2.35919	1.6291		Heterogeneous nuclear ribonucleoprotein K	HNRNPK	-1.93066	-0.169923		Chloride intracellular channel protein 4	CLIC4	-2.3879	-3.23569
Microprocessor complex subunit DGCR8	DGCR8	-2.37176	1.3129		T-box transcription factor TBX3	TBX3	-1.94303	-1.19694		60S acidic ribosomal protein P0;60S acidic ribosomal protein P0-like	RPLP0;RPLP0P6	-2.40064	-2.70972
Serine/arginine-rich splicing factor 5	SRSF5	-2.37183	1.20094		Protein mago nashi homolog;Protein mago nashi homolog 2	MAGOH;MAGOHB	-1.95333	0.190678		Actin, cytoplasmic 2;Actin, cytoplasmic 2, N-terminally processed	ACTG1	-2.41419	-2.26861
Pleiotropic regulator 1	PLRG1	-2.39981	1.62134		RNA-binding protein 25	RBM25	-1.95433	0.766214		Ras GTPase-activating-like protein IQGAP1	IQGAP1	-2.4165	-2.13062
Transcription factor E4F1	E4F1	-2.43105	1.22002		Annexin A1;Annexin	ANXA1	-1.97341	-2.42965		Methylcrotonoyl-CoA carboxylase subunit alpha, mitochondrial	MCCC1	-2.41742	0.740453
ATP-dependent RNA helicase DDX1	DDX1	-2.43674	0.743644		Transmembrane protein 43	TMEM43	-2.01794	0.147046		Chromatin assembly factor 1 subunit A	CHAF1A	-2.4288	-1.06145
Pre-mRNA-splicing factor SPF27	BCAS2	-2.43721	1.62045		Caspase-14;Caspase-14 subunit p19;Caspase-14 subunit p10	CASP14	-2.01935	0.183201		Synaptic vesicle membrane protein VAT-1 homolog	VAT1	-2.44058	-2.6932
Protein HIRA	HIRA	-2.44214	3.16092		Desmocollin-1	DSC1	-2.04609	-2.59728		F-actin-capping protein subunit beta	CAPZB	-2.45553	-3.10905
Nuclease-sensitive element-binding protein 1	YBX1	-2.52201	3.51058		Probable ATP-dependent RNA helicase DDX17	DDX17	-2.05002	-1.79391		Importin subunit beta-1	KPNB1	-2.4649	-2.89916
5-methylcytosine rRNA methyltransferase NSUN4	NSUN4	-2.53994	1.87822		Splicing factor, proline- and glutamine-rich	SFPQ	-2.05583	-1.97591		Thioredoxin-dependent peroxide reductase, mitochondrial	PRDX3	-2.48092	-2.82552
tRNA-splicing ligase RtcB homolog	RTCB	-2.54945	1.70509		14-3-3 protein sigma	SFN	-2.07449	-2.73082		Fatty acid synthase;[Acyl-carrier-protein] S-acetyltransferase;[Acyl-carrier-protein] S-malonyltransferase;3-oxoacyl-[acyl-carrier-protein] synthase;3-oxoacyl-[acyl-carrier-protein] reductase;3-hydroxyacyl-[acyl-carrier-protein] dehydratase;Enoyl-[acyl-carrier-protein] reductase;Oleoyl-[acyl-carrier-protein] hydrolase	FASN	-2.5039	-1.16553
Suppressor of SWI4 1 homolog	PPAN	-2.55818	2.68836		RNA-binding protein 7	RBM7	-2.07735	0.319155		Nicotinamide N-methyltransferase	NNMT	-2.52433	-1.28514
Ubinuclein-1	UBN1	-2.57923	2.56203		Ig gamma-1 chain C region	IGHG1	-2.08583	0.592636		Cathepsin B;Cathepsin B light chain;Cathepsin B heavy chain	CTSB	-2.53149	-3.14778
Heterogeneous nuclear ribonucleoprotein D-like	HNRNPDL	-2.58338	1.48702		Serine/arginine-rich splicing factor 6	SRSF6	-2.09406	2.14006		40S ribosomal protein SA	RPSA;RPSAP58	-2.57863	-1.89116
39S ribosomal protein L20, mitochondrial	MRPL20	-2.59833	-0.987131		Cilia- and flagella-associated protein 20	CFAP20	-2.1136	1.22639		Serine/threonine-protein phosphatase 2B catalytic subunit alpha isoform;Serine/threonine-protein phosphatase;Serine/threonine-protein phosphatase 2B catalytic subunit beta isoform	PPP3CA;PPP3CB	-2.58009	-1.3184
SWI/SNF-related matrix-associated actin-dependent regulator of chromatin subfamily D member 2	SMARCD2	-2.60902	1.87255		Serine/arginine-rich splicing factor 1	SRSF1	-2.11923	2.21135		Transaldolase	TALDO1	-2.58035	-0.599593
Heat shock protein HSP 90-alpha	HSP90AA1	-2.62282	-1.847		Testis-specific Y-encoded-like protein 1	TSPYL1	-2.12325	-1.33181		Fascin	FSCN1	-2.59737	-3.01578
Zinc finger protein 579	ZNF579	-2.62442	3.43816		Pyruvate carboxylase, mitochondrial	PC	-2.13157	2.80174		Flap endonuclease 1	FEN1	-2.6144	-2.15779
Vascular endothelial zinc finger 1	VEZF1	-2.66557	2.66948		La-related protein 1	LARP1	-2.13987	1.91827		Trifunctional enzyme subunit alpha, mitochondrial;Long-chain enoyl-CoA hydratase;Long chain 3-hydroxyacyl-CoA dehydrogenase	HADHA	-2.62923	-1.12809
RRP15-like protein	RRP15	-2.67006	2.80314		Putative elongation factor 1-alpha-like 3;Elongation factor 1-alpha 1;Elongation factor 1-alpha 2	EEF1A1P5;EEF1A1;EEF1A2	-2.18266	-3.02503		Destrin	DSTN	-2.67955	-2.44882
SWI/SNF complex subunit SMARCC2	SMARCC2	-2.69965	1.93554		Serine/arginine-rich splicing factor 9	SRSF9	-2.19694	1.58525		Galectin-1	LGALS1	-2.69385	-3.67789
RNA-binding protein 7	RBM7	-2.71104	1.88581		Eukaryotic initiation factor 4A-III;Eukaryotic initiation factor 4A-III, N-terminally processed	EIF4A3	-2.24462	1.35789		Peptidyl-prolyl cis-trans isomerase FKBP4;Peptidyl-prolyl cis-trans isomerase FKBP4, N-terminally processed	FKBP4	-2.71615	-4.03829
Chromatin target of PRMT1 protein	CHTOP	-2.74574	2.32011		Thioredoxin	TXN	-2.24756	-3.12671		Translocon-associated protein subunit delta	SSR4	-2.73044	-2.16159
RNA-binding protein 40	RNPC3	-2.76239	3.96671		60 kDa heat shock protein, mitochondrial	HSPD1	-2.32409	-1.52599		26S protease regulatory subunit 7	PSMC2	-2.73812	-3.06082
Histone-binding protein RBBP7	RBBP7	-2.8137	2.58405		Glyceraldehyde-3-phosphate dehydrogenase	GAPDH	-2.39017	-2.22115		Polyadenylate-binding protein 1;Polyadenylate-binding protein 3	PABPC1;PABPC3	-2.74594	-1.81335
28S ribosomal protein S18b, mitochondrial	MRPS18B	-2.82378	2.26327		Serine/arginine repetitive matrix protein 2	SRRM2	-2.39252	1.63306		Nucleosome assembly protein 1-like 1	NAP1L1	-2.75906	-2.48932
Heparan sulfate 2-O-sulfotransferase 1	HS2ST1	-2.83054	-0.754212		Vimentin	VIM	-2.50038	-2.9614		Filamin-C	FLNC	-2.77487	-3.68216
Superkiller viralicidic activity 2-like 2	SKIV2L2	-2.83764	1.83487		Probable ATP-dependent RNA helicase DDX5	DDX5	-2.61149	-2.55521		Tropomyosin alpha-3 chain	TPM3	-2.79256	-2.75215
Serpin B3;Serpin B4	SERPINB3;SERPINB4	-2.86617	-2.93346		Heat shock protein HSP 90-beta	HSP90AB1	-2.65136	-3.07327		Glucose-6-phosphate isomerase	GPI	-2.79726	-3.42213
Nucleolar RNA helicase 2	DDX21	-2.86807	1.0155		Putative protein C3P1	C3P1	-2.67475	-0.174003		D-3-phosphoglycerate dehydrogenase	PHGDH	-2.79796	-3.09025
Calcineurin-binding protein cabin-1	CABIN1	-2.86849	3.35445		Annexin A2;Annexin;Putative annexin A2-like protein	ANXA2;ANXA2P2	-2.69348	-2.54759		Phosphoglycerate mutase 1	PGAM1	-2.80803	-2.52633
Annexin A2;Annexin;Putative annexin A2-like protein	ANXA2;ANXA2P2	-2.88119	-2.75302		Keratin, type II cytoskeletal 2 epidermal	KRT2	-2.7616	-5.09128		Heat shock protein HSP 90-alpha	HSP90AA1	-2.81594	-4.05491
Pescadillo homolog	PES1	-2.88673	2.46897		60S ribosomal protein L35a	RPL35A	-2.98553	-2.83929		Putative protein C3P1	C3P1	-2.81624	-3.0829
YLP motif-containing protein 1	YLPM1	-2.90228	2.12194		Junction plakoglobin	JUP	-3.12318	-3.13771		4F2 cell-surface antigen heavy chain	SLC3A2	-2.82869	-2.56183
Putative elongation factor 1-alpha-like 3;Elongation factor 1-alpha 1;Elongation factor 1-alpha 2	EEF1A1P5;EEF1A1;EEF1A2	-2.90293	-3.03528		U4/U6 small nuclear ribonucleoprotein Prp3	PRPF3	-3.22918	-3.05182		Deoxyuridine 5-triphosphate nucleotidohydrolase, mitochondrial	DUT	-2.85152	-1.01742
Histone chaperone ASF1A	ASF1A	-2.92566	2.52537		Dermcidin;Survival-promoting peptide;DCD-1	DCD	-4.44901	-4.57185		Triosephosphate isomerase	TPI1	-2.85298	-2.72547
Poly(U)-binding-splicing factor PUF60	PUF60	-2.93258	2.2107
U11/U12 small nuclear ribonucleoprotein 48 kDa protein	SNRNP48	-2.93556	2.32395
Putative protein C3P1	C3P1	-2.93932	-0.572544
Ubinuclein-2	UBN2	-2.97053	2.77926
39S ribosomal protein L47, mitochondrial	MRPL47	-2.9712	2.09048
RNA-binding motif protein, X chromosome;RNA-binding motif protein, X chromosome, N-terminally processed	RBMX	-2.98507	2.35761
Zinc finger C3H1 domain-containing protein	ZFC3H1	-3.00162	1.83334
Chromodomain-helicase-DNA-binding protein 3	CHD3	-3.00857	2.69822
Ig gamma-1 chain C region	IGHG1	-3.02198	-1.13033
Heterogeneous nuclear ribonucleoprotein R	HNRNPR	-3.03009	2.26879
Zinc finger and BTB domain-containing protein 10	ZBTB10	-3.04478	4.77473
KH domain-containing, RNA-binding, signal transduction-associated protein 1	KHDRBS1	-3.07097	1.37796
ATP-dependent RNA helicase DDX3X;ATP-dependent RNA helicase DDX3Y	DDX3X;DDX3Y	-3.11829	1.64441
Glyceraldehyde-3-phosphate dehydrogenase	GAPDH	-3.12708	-4.79931
Scaffold attachment factor B2	SAFB2	-3.12746	2.61612
TATA-binding protein-associated factor 2N	TAF15	-3.16398	2.57248
Heterogeneous nuclear ribonucleoprotein A1;Heterogeneous nuclear ribonucleoprotein A1, N-terminally processed;Heterogeneous nuclear ribonucleoprotein A1-like 2	HNRNPA1;HNRNPA1L2	-3.16514	1.17358
14-3-3 protein zeta/delta	YWHAZ	-3.17827	-2.17202
RNA binding motif protein, X-linked-like-1	RBMXL1	-3.25181	2.3966
Heterogeneous nuclear ribonucleoproteins A2/B1	HNRNPA2B1	-3.25622	1.73847
UPF0568 protein C14orf166	C14orf166	-3.26424	1.72831
Transmembrane protein 43	TMEM43	-3.27467	1.14945
Zinc finger BED domain-containing protein 6	ZBED6	-3.27872	3.92695
Heterogeneous nuclear ribonucleoprotein A3	HNRNPA3	-3.29647	1.96654
Metastasis-associated protein MTA2	MTA2	-3.30757	2.83483
ATP-dependent RNA helicase DDX50	DDX50	-3.32415	2.60782
Something about silencing protein 10	UTP3	-3.33986	1.84101
39S ribosomal protein L24, mitochondrial	MRPL24	-3.35831	2.36732
Serine/arginine-rich splicing factor 11	SRSF11	-3.36084	2.70348
Protein S100-A7;Protein S100-A7A	S100A7;S100A7A	-3.39675	-2.70962
Cleavage and polyadenylation specificity factor subunit 5	NUDT21	-3.40932	0.86584
Transcriptional repressor p66-alpha	GATAD2A	-3.4367	4.38764
SURP and G-patch domain-containing protein 2	SUGP2	-3.45728	3.15437
Heterogeneous nuclear ribonucleoprotein U	HNRNPU	-3.47862	3.52005
60S ribosomal protein L35a	RPL35A	-3.52826	-2.40499
Scaffold attachment factor B1	SAFB	-3.55429	2.76598
DnaJ homolog subfamily C member 13	DNAJC13	-3.57347	1.90989
Thioredoxin	TXN	-3.63027	-3.5575
Protein FAM98A	FAM98A	-3.65265	1.67365
RNA-binding protein FUS	FUS	-3.65757	1.6707
U4/U6 small nuclear ribonucleoprotein Prp3	PRPF3	-3.6707	-2.64973
ATP synthase subunit beta, mitochondrial;ATP synthase subunit beta	ATP5B	-3.7201	-0.368402
Non-POU domain-containing octamer-binding protein	NONO	-3.75805	0.593593
Ribosome biogenesis protein BOP1	BOP1	-3.7949	3.70332
Testis-specific Y-encoded-like protein 5	TSPYL5	-3.87764	1.58439
Cyclin-K	CCNK	-3.88833	2.06077
RNA-binding protein EWS	EWSR1	-3.91419	1.47814
Ribosome biogenesis protein WDR12	WDR12	-3.91818	3.97187
Enhancer of rudimentary homolog	ERH	-3.94127	3.60407
Replication initiator 1	REPIN1	-3.96317	3.26742
Testis-specific Y-encoded-like protein 1	TSPYL1	-4.09544	0.478713
14-3-3 protein sigma	SFN	-4.10351	-4.32389
Thyroid hormone receptor-associated protein 3	THRAP3	-4.31663	4.26514
Dermcidin;Survival-promoting peptide;DCD-1	DCD	-4.36035	-3.19866
Bcl-2-associated transcription factor 1	BCLAF1	-4.45223	4.03844
Poly(rC)-binding protein 2	PCBP2	-4.52118	2.81809
E3 ubiquitin-protein ligase ZFP91	ZFP91;ZFP91-CNTF	-4.64216	2.28593
Probable ATP-dependent RNA helicase DDX17	DDX17	-4.70324	0.405666
Keratin, type II cytoskeletal 2 epidermal	KRT2	-4.86082	-6.01644
Splicing factor, proline- and glutamine-rich	SFPQ	-4.87024	0.652509
Zinc finger and BTB domain-containing protein 7B	ZBTB7B	-4.94706	4.63564
Probable ATP-dependent RNA helicase DDX5	DDX5	-5.00973	-0.1376
Poly(rC)-binding protein 1	PCBP1	-5.04673	3.51425
Heterogeneous nuclear ribonucleoprotein K	HNRNPK	-5.17433	3.29421
ATP-dependent RNA helicase DHX36	DHX36	-6.69105	5.17305
