# Supplementary material for: Characterization of the mechanism by which the RB/E2F pathway controls expression of the cancer genomic DNA deaminase APOBEC3B
Source: eLife. 2020 Sep 28;9:e61287. doi: 10.7554/eLife.61287 (PMC7553775; doi:10.7554/eLife.61287)
Supplement: Supplementary file 3. [file elife-61287-supp3.xls]

## Sheet: S3_E2F_dereg_tumors
Roelofs et al. 2020		All values relative to TBP
Supplementary Table S3
TCGA Sample ID	E2F Group	BUB1	CCNA2	CCNB2	CDC20	CDC45	CDCA5	CDCA8	CENPA	CEP55	DEPDC1B	FOXM1	GTSE1	HJURP	KIF2C	KIFC1	MELK	PLK1	RAD51	TPX2	UBE2C
TCGA-A1-A0SO	high	14.7533	5.95285	5.32158	8.93539	4.07342	8.43172	8.68575	5.08664	8.74596	2.43759	25.258	4.38766	3.20558	9.66226	10.9163	5.60793	11.3451	2.51835	62.2775	5.20411
TCGA-A2-A04T	high	6.13542	6.12273	5.05208	6.8138	2.13151	6.6263	8.94661	1.43229	3.76953	1.01172	29.5419	2.55208	3.19271	7.83333	9.21745	2.72786	4.47266	1.38542	18.9909	5.36068
TCGA-A2-A0CX	high	6.67547	6.30675	5.00755	5.16226	3.49434	5.68302	3.22264	1.5849	6.11698	0.954717	11.7064	2.21509	3.21509	4.64151	5.00377	3.23773	10.5019	2.30189	20.2226	8.53962
TCGA-A2-A0D2	high	5.06557	6.72312	14.4033	16.2934	5.07869	16.9164	11.823	1.9623	5.75738	2.69508	30.844	2.88361	4.09508	14.4639	14.3164	4.55082	11.6623	2.23279	24.4098	11.8918
TCGA-A2-A25B	high	9.97581	7.36663	6.04839	6.125	1.31452	4.28629	5.43548	1.65323	7.71573	2.12298	7.30724	1.91129	4.81855	5.78831	4.45161	2.5504	7.23387	1.76008	24.4234	6.8004
TCGA-A7-A13D	high	8.27941	3.84008	4.73319	12.4265	1.88235	4.32773	6.88235	2.5105	5.45168	0.817227	9.76405	2.32983	2.88025	9.0063	4.31302	8.02521	6.96428	3.22059	20.063	15.958
TCGA-A7-A13F	high	4.79874	5.28777	6.22327	6.78617	4.61635	7.85849	5.40566	1.1195	6.58176	1.61321	22.903	2.48742	2.66352	7.51258	9.16038	4.06289	3.5	5.22327	16.0346	14.2138
TCGA-A7-A6VY	high	4.84739	5.24798	3.06292	11.1647	1.54485	6.25167	5.11647	1.75502	3.10308	0.696118	11.52	1.44043	2.67871	6.13387	6.94244	4.82062	7.97858	1.37349	12.8461	7.08568
TCGA-A8-A079	high	5.49677	6.9051	6.15968	15.0435	3.32258	9.18387	5.0629	1.45161	3.17419	1.74032	15.6301	3.35806	2.33871	11.9419	6.13548	2.56452	8.51613	2.3871	12.9081	15.2097
TCGA-A8-A07R	high	7.35663	17.4623	7.73656	10.7993	4.84229	12.1326	6.51971	1.70072	4.33692	1.20968	19.1762	4.56452	7.72939	6.73297	9.06631	7.27419	17.3029	3.37634	25.6362	10.4803
TCGA-A8-A07S	high	4.75522	3.47194	4.0597	4.80896	1.51045	4.15224	4.10448	0.952239	4.51045	1.02687	10.5709	2.27463	2.29552	4.72537	6.8209	2.55224	5.17612	1.41194	11.6	3.95522
TCGA-A8-A08F	high	6.13195	7.96584	5.49653	6.7257	5.48264	9.49653	5.89584	1.01389	5.9375	1.1632	12.9092	3.42014	5.46528	8.64584	13.125	5.31945	10.3229	4.04514	29.382	9.77431
TCGA-A8-A08R	high	8.63355	3.54388	3.99097	13.9652	2.03613	5.68258	10.88	1.40516	4.73548	0.984516	15.8959	3.42839	3.69677	6.91097	8.90581	3.4271	4.61161	2.92258	15.5135	6.34581
TCGA-AN-A04C	high	6.03191	9.65816	6.625	6.45213	3.05319	7.89894	5.88564	3.57713	5.65957	1.19149	12.3893	2.54255	5.45213	6.66223	9.43351	5.00798	6.14096	4.39628	18.6888	9.81383
TCGA-AN-A0G0	high	4.65293	4.00203	5.45943	7.23221	4.85144	5.04245	3.87016	1.09363	4.54057	1.0025	10.7529	4.81898	3.56305	4.7216	4.01623	4.00874	6.45818	1.67416	11.1598	4.28714
TCGA-AN-A0XU	high	6.8676	5.2619	4.48442	11.9299	3.01869	3.56231	3.45794	2.40187	6.30374	1.3972	16.124	3.73832	4.50623	6.30062	6.95016	3.28661	9.68069	1.1028	17.9174	6.82243
TCGA-AO-A03R	high	5.90865	5.83663	12.3654	16.3077	1.44712	8.84135	8.04327	1.90385	10.4663	2.49038	13.5381	4.27885	7.16346	12.6875	14.5192	5.04327	5.69231	3.05769	25.2692	22.8365
TCGA-AO-A0J2	high	11.2251	7.50155	20.9581	25.1204	6.63874	15.1414	10.7016	3.92147	8.79058	5.10995	38.0541	4.76963	7.04974	12.3115	14.5052	8.6466	11.8403	3.49738	36.3848	16.2618
TCGA-AO-A0J6	high	3.25734	8.80899	3.74501	12.6169	1.2832	5.93302	6.83196	3.11751	3.83666	0.981199	10.2722	2.22209	2.80846	6.90482	6.12338	5.77321	6.27027	1.3678	17.2385	5.29847
TCGA-AO-A0JM	high	3.14571	4.93909	5.44	6.62	2.22571	6.64	4.55714	0.888572	3.63143	1.08857	8.62094	2.15429	2.66857	4.77714	6.72857	4.27429	4.15429	2.77714	16.3257	6.80857
TCGA-AO-A1KR	high	3.3569	4.10074	4.87542	19.6667	3.20202	4.51515	6.86869	3.38047	9.19529	1.39394	19.8947	2.95623	5.61279	9.65993	6.59259	3.23569	4.38721	1.37374	18.4781	18.2997
TCGA-AR-A0TP	high	7.29337	3.24117	3.12755	7.43623	2.45663	6.6301	4.71174	1.21684	5.67347	1.58163	16.321	3.18878	2.30102	4.8699	12.1786	4.57398	4.44133	1.40816	21.676	5.09694
TCGA-AR-A0U4	high	5.97826	7.96219	6.05534	8.55336	1.37747	6.06127	6.50791	2.17589	6.38142	1.16206	20.976	3.06127	2.55534	4.85968	3.87154	2.91897	7.55138	1.61067	16.1008	7.98221
TCGA-AR-A1AY	high	3.76932	3.42296	3.18668	9.80262	2.23424	5.56599	5.63971	0.853746	4.63971	1.29964	12.572	2.04281	2.35196	6.01546	5.46373	3.10939	9.3698	1.59215	16.3639	7.02497
TCGA-AR-A5QQ	high	2.80306	4.8238	5.36672	13.2071	2.19355	6.17148	3.80985	1.40407	4.59932	1.43124	9.61771	2.11036	3.57725	6.27674	6.8472	4.34126	6.76231	2.22071	10.4652	9.33107
TCGA-B6-A0RE	high	3.79024	3.16119	3.52033	6.90407	1.20325	4.64878	4.05041	1.75772	5.42764	2.33984	14.9791	1.70407	3.61138	4.43089	5.1561	3.1187	5.32683	1.57398	13.7545	8.20325
TCGA-B6-A0RU	high	3.7748	4.72024	5.55764	9.17963	2.21984	4.35791	7.14611	1.48794	2.75737	1	8.22416	3.72252	2.45442	6.0429	7.02011	4.09383	5.26274	1.00134	18.0469	5.40349
TCGA-B6-A0X1	high	9.75921	4.82767	7.0344	14.9631	1.55283	8.8231	9.11548	4.01474	5.76413	1.69287	41.1417	3.07371	3.01966	9.5602	7.99017	5.64373	11.4619	1.62899	16.258	5.23833
TCGA-B6-A0X5	high	3.36266	6.1871	4.6867	6.33476	1.53219	5.53433	3.87339	1.3927	4.72532	2.4206	12.4862	3.21245	2.86695	4.50858	5.70815	2.87768	4.25107	2.33262	11.0644	5.43562
TCGA-BH-A0B3	high	7.1045	4.35704	7.48621	18.1814	1.373	4.93469	4.85196	2.51089	5.96662	0.770682	11.6908	1.3701	2.59071	8.6836	9.02468	4.12047	9.38462	2.18723	29.6343	9.06241
TCGA-BH-A18R	high	5.89539	9.98046	5.89539	5.72518	2.62766	6.19858	4.53369	1.09397	8.6383	1.45035	21.6423	3.02837	3.97518	6.94681	5.52837	4.15958	7.96631	1.81028	17.4379	5.59575
TCGA-BH-A18V	high	9.80623	6.19818	10.3428	7.75474	1.99458	10.832	7.09485	2.16531	13.2168	1.57724	30.0763	4.60298	5.64092	6.43631	15.4322	9.66125	12.8049	5.38482	28.8672	8.73577
TCGA-C8-A12L	high	6.91932	9.11834	8.12225	5.00978	1.88264	5.93154	3.58191	1.58924	6.27628	1.55746	20.6174	6.64548	2.51834	4.91443	4.27384	3.48411	10.7824	2.18093	21.3692	8.13447
TCGA-C8-A134	high	7.23964	5.41121	7.09796	8.25622	1.20422	6.95931	6.80407	5.00527	4.24115	0.946496	9.62865	2.78222	2.21176	9.12283	11.306	8.05275	7.36021	1.11756	17.7001	6.85381
TCGA-C8-A137	high	7.28852	5.76915	6.40328	6.12787	1.51803	5.42951	4.54426	1.14754	4.87213	1.28525	9.26829	3.08197	1.79344	6.97377	3.98688	3.22951	5.70164	1.4	17.0098	6.6918
TCGA-C8-A275	high	4.38745	5.55422	3.98593	4.11796	1.51623	3.71429	3.54978	1.46861	4.41125	1.76948	6.81011	2.69264	3.51299	4.49026	4.46645	4.2868	5.03247	1.62446	10.6212	5.50325
TCGA-C8-A27B	high	5.47308	5.3421	3.72212	12.6365	2.08462	3.94327	3.3625	2.30288	4.28365	1.41538	8.3149	2.78942	5.32308	10.7731	8.71923	3.91731	3.425	1.675	17.7337	4.03942
TCGA-D8-A1JD	high	3.79518	5.53796	3.22222	5.12048	1.59438	4.46452	2.27175	0.726908	6.50736	1.22624	8.42125	1.23829	2.04953	4.6332	3.79652	3.87416	4.97323	1.79384	13.8447	4.05087
TCGA-E2-A109	high	4.84087	4.38757	4.86896	4.32449	1.54446	7.49766	3.04212	1.60062	3.60374	1.52418	8.52666	2.3791	2.83931	4.09672	5.37754	2.4571	5.33853	1.88924	11.3853	8.49298
TCGA-E2-A14N	high	5.19818	6.02184	7.66	12.1582	1.58	5.17636	10.6945	4.38727	8.35818	1.05273	19.5317	3.00182	3.54182	7.03818	3.53454	8.32364	5.01273	1.92727	18.2345	9.28364
TCGA-E2-A14V	high	4.98271	5.63813	4.80692	4.73631	1.56052	3.46109	2.75504	1.19164	7.65274	1.34438	12.2597	2.05764	2.52882	4.33718	6.28242	4.19885	8.17435	1.35879	22.6844	11.098
TCGA-E2-A1LH	high	2.44595	2.85541	3.58559	7.05406	2.14414	4.77478	4.18018	1.15766	4.11712	0.936937	9.13807	3.38739	8.23874	3.36487	5.78829	2.85586	5.03604	1.70721	10.3694	19.0676
TCGA-E2-A1LI	high	8.06568	7.22374	3.70911	9.4571	2.45308	5.90348	6.78284	2.54289	6.07507	1.33378	12.923	2.3244	5.8311	6.52815	12.6327	10.3606	7.88472	1.83244	23.8767	11.0013
TCGA-E9-A1RH	high	6.69691	11.8323	4.31942	8.11615	2.45372	6.1706	3.86933	5.49183	5.15426	0.954628	5.70822	3.77132	2.73321	5.0127	4.3412	3.70054	8.41198	1.62432	15.686	9.28675
TCGA-E9-A22G	high	3.66874	3.45128	4.4441	8.78261	3.13768	6.68944	8.86749	3.88095	5.64803	1.92132	25.3814	3.23188	3.64803	14.0445	7.71014	7.72567	4.29296	1.27536	21.7371	5.29296
TCGA-EW-A1P4	high	6.62166	7.51462	6.70064	9.25605	1.72102	3.58599	3.45987	2.04968	4.01529	1.14777	14.7629	2.60764	3.66242	6.88662	6.43567	3.63949	8.8879	1.19363	19.2535	6.98599
TCGA-EW-A1PC	high	5.83914	3.42142	3.09182	8.81769	1.64477	4.26944	3.52346	2.25067	6.05965	2.13606	9.12263	3.34651	3.83914	6.2118	8.11126	7.24933	4.35657	0.881367	41.0751	10.1361
TCGA-GM-A2DF	high	12.4815	5.88439	13.582	19.9894	3.9418	8.80953	12.4603	4.93651	9.64021	2.48148	17.6801	7.13228	6.09524	10.3651	18.1058	12.5503	11.9101	2.53439	19.5344	21.2857
TCGA-GM-A3XL	high	4.13596	7.95681	8.04934	11.0296	4.32566	9.19737	4.37939	2.04057	3.47259	0.967105	15.0931	2.84211	2.67325	6.4386	5.28399	5.31031	7.25658	1.75548	16.386	9.7182
TCGA-HN-A2NL	high	3.35963	3.89135	6.31016	10.6136	2.03342	9.63235	7.10829	2.79144	4.67647	2.40775	30.1577	3.1123	3.53075	12.1203	11.7393	2.21925	5.38369	1.02005	22.0575	11.9265
TCGA-LL-A8F5	high	4.33867	4.5214	4.94508	16.5172	4.91991	6.78718	3.88101	1.56979	3.27918	0.963386	14.1268	4.05263	2.7254	8.15332	8.55377	5.44622	8.16247	2.37757	16.1419	14.5057
TCGA-S3-AA10	high	4.73472	8.99872	3.14009	9.09836	1.5544	6.45156	5.83159	2.15499	7.3532	1.55291	20.1735	2.66766	4.97317	6.52161	9.15201	4.38003	6.35022	1.14605	19.3353	10.2861
TCGA-UU-A93S	high	3.93487	5.0454	5.659	10.705	5.00383	11.8314	2.72031	2.32184	6.65134	1.71264	9.05609	2.21456	3.67433	9.56705	14.1303	5.0613	6.29119	2.2069	11.8544	9.45211
TCGA-5L-AAT0	low	0.370968	0.380564	0.459678	0.737903	0.272177	0.860887	0.510081	0.112903	0.296371	0.0806453	0.443931	0.270161	0.358871	0.433468	0.868951	0.350807	0.332661	0.292339	1.20161	0.586693
TCGA-5L-AAT1	low	0.492537	0.219552	0.350746	1.06716	0.0671642	0.482587	0.300995	0.0572139	0.141791	0.0273633	0.42107	0.131841	0.124378	0.18408	0.320896	0.273632	0.248756	0.166667	0.616915	0.231343
TCGA-A2-A0CO	low	0.224026	0.300974	0.253247	0.324675	0.144481	0.373377	0.323052	0.0487012	0.23539	0.0811687	0.593117	0.196429	0.102273	0.222403	0.741883	0.113636	0.443182	0.107143	0.582792	0.246753
TCGA-A2-A0CP	low	0.104225	0.153944	0.287324	0.501408	0.028169	0.391549	0.31831	0.0676057	0.194366	0.0309861	0.563915	0.149296	0.126761	0.298592	0.608451	0.0901407	0.357746	0.152113	0.873239	0.414085
TCGA-A2-A0CV	low	0.191458	0.155228	0.480118	0.407953	0.019146	0.326951	0.424153	0.019146	0.0898381	0.030928	0.248969	0.0559644	0.0471282	0.0736379	0.164949	0.466863	0.167894	0.104565	1.08395	0.188512
TCGA-A2-A0CZ	low	0.461942	0.469764	0.622047	1.02625	0.0839895	0.55643	0.580052	0.149607	0.461942	0.0866142	0.984987	0.175853	0.228347	0.635171	0.742782	0.28084	0.627296	0.183727	1.5748	0.611549
TCGA-A2-A0D3	low	0.235131	0.227026	0.24758	0.312587	0.0456431	0.293223	0.556017	0.0677731	0.163209	0.0387276	0.444067	0.0968187	0.11065	0.161826	0.351314	0.131397	0.262794	0.0733056	0.940526	0.15491
TCGA-A2-A0EN	low	0.664179	0.719478	0.343284	0.59204	0.113184	0.562189	0.385572	0.181592	0.564677	0.164179	1.08055	0.283582	0.436567	0.396766	0.728856	0.415423	0.579602	0.150498	1.5	0.516169
TCGA-A2-A0ES	low	0.661017	0.549245	0.550077	0.453004	0.200308	0.357473	0.525424	0.101695	0.57319	0.158706	0.732866	0.241911	0.257319	0.511556	0.710323	0.408321	0.431433	0.192604	1.42219	0.620955
TCGA-A2-A0EW	low	0.585756	0.520247	0.52907	0.561047	0.12936	0.53343	0.43314	0.149709	0.414244	0.155523	1.05049	0.225291	0.289244	0.52907	0.760174	0.337209	0.47093	0.232558	1.2936	0.43314
TCGA-A2-A0EX	low	0.345902	0.462148	0.362295	0.534426	0.147541	0.516393	0.531148	0.0885245	0.290164	0.0967214	0.536541	0.140983	0.142623	0.439344	0.496721	0.291803	0.268853	0.206557	1.28361	0.278688
TCGA-A2-A0T6	low	0.42804	0.31691	0.30273	0.388337	0.0384614	0.431762	0.37469	0.0297765	0.26675	0.0508685	0.463424	0.114144	0.17866	0.277915	0.373449	0.246898	0.246898	0.121588	1.13772	0.17866
TCGA-A2-A0YI	low	0.402273	0.391659	0.381818	0.5	0.105682	0.381818	0.321591	0.0375	0.346591	0.0784093	0.612227	0.197727	0.195455	0.402273	0.371591	0.202273	0.295455	0.178409	0.788636	0.293182
TCGA-A2-A1G0	low	0.503329	0.400213	0.302264	0.587217	0.129161	0.406125	0.585885	0.0505993	0.386152	0.0998667	0.533941	0.271638	0.197071	0.537949	0.581891	0.157124	0.34221	0.163781	1.31158	0.283622
TCGA-A2-A1G6	low	0.0780572	0.13163	0.0945361	0.105811	0.0216826	0.113617	0.130096	0.0130094	0.0719861	0.0130094	0.12425	0.0459672	0.0416306	0.0745881	0.15438	0.0520381	0.105811	0.0659149	0.178664	0.0581092
TCGA-A2-A259	low	0.5	0.411636	0.288863	0.693736	0.142691	0.631091	0.531323	0.135731	0.388631	0.103248	0.552367	0.167053	0.24826	0.517401	0.583527	0.279582	0.795824	0.334107	1.28538	0.397912
TCGA-A2-A4RY	low	0.289062	0.363594	0.369141	0.527344	0.128906	0.505859	0.408203	0.0527344	0.228515	0.103516	0.900605	0.160156	0.208984	0.320313	0.816406	0.208984	0.357422	0.148438	0.929688	0.324219
TCGA-A2-A4S0	low	0.259681	0.323462	0.255125	0.359909	0.0432801	0.366742	0.400911	0.0751707	0.177677	0.0911164	0.979954	0.232346	0.191344	0.22779	0.671982	0.125285	0.29385	0.100228	0.915718	0.264237
TCGA-A7-A0CH	low	0.776453	0.741937	0.597616	0.733234	0.183309	0.657228	0.652757	0.080477	0.57079	0.135618	0.986095	0.28465	0.448584	0.61848	0.745157	0.363637	0.654247	0.268256	1.82861	0.5231
TCGA-A7-A0D9	low	0.45977	0.39129	0.475096	0.369093	0.204342	0.455939	0.541507	0.0919539	0.425287	0.167305	0.628404	0.264368	0.301405	0.45083	0.45083	0.42401	0.31673	0.120051	1.29374	0.366539
TCGA-A7-A13G	low	0.582248	0.596473	0.511243	0.794083	0.276923	0.515976	0.623668	0.146746	0.570414	0.144379	1.06594	0.291124	0.427219	0.495858	0.809467	0.331361	0.814201	0.260355	1.82485	0.466272
TCGA-A7-A13H	low	0.4	0.41094	0.309289	0.568306	0.146448	0.52459	0.442623	0.0797813	0.346448	0.115847	0.771672	0.194536	0.266667	0.418579	0.676503	0.23388	0.660109	0.210929	0.868852	0.394535
TCGA-A7-A5ZW	low	0.243386	0.489273	0.312169	0.414021	0.0925925	0.44709	0.27381	0.0753967	0.466931	0.0939153	0.385066	0.161376	0.18254	0.280423	0.562169	0.215609	0.308201	0.177249	0.824074	0.28836
TCGA-A7-A5ZX	low	0.137116	0.231147	0.148936	0.205674	0.040189	0.223404	0.195035	0.0271869	0.0721039	0.0543734	0.258286	0.0768322	0.0780143	0.134752	0.319149	0.0673759	0.157211	0.0862883	0.379433	0.187943
TCGA-A8-A06Y	low	0.389831	0.513068	0.354237	0.40678	0.0966101	0.538983	0.39322	0.108475	0.425424	0.144068	1.44853	0.181356	0.291525	0.391526	0.513559	0.535593	0.727119	0.171187	1.91695	0.744068
TCGA-A8-A07G	low	0.811733	0.647067	0.675307	0.710778	0.230559	0.837653	0.656208	0.140519	0.555253	0.160982	1.1809	0.332879	0.300137	0.600273	0.754434	0.260573	0.631651	0.309686	2.09277	0.529332
TCGA-A8-A083	low	0.462908	0.146459	0.22453	0.597428	0.0880317	0.289812	0.334322	0.0207713	0.127596	0.0405541	0.431019	0.16815	0.117705	0.18002	0.403561	0.198813	0.266073	0.120673	1.44708	0.266073
TCGA-A8-A08C	low	0.568445	0.825487	0.551044	0.653132	0.12761	0.5	0.574246	0.140371	0.570766	0.0974476	0.989548	0.293504	0.317865	0.527842	1.16937	0.383991	0.800464	0.199536	1.78654	0.475638
TCGA-A8-A0A2	low	0.494642	0.646059	0.465787	0.526793	0.142621	0.490519	0.483924	0.11047	0.384996	0.163232	1.16145	0.126133	0.386645	0.450124	0.789778	0.258862	0.484748	0.313273	1.64138	0.484748
TCGA-A8-A0A6	low	0.572614	0.705954	0.612033	0.572614	0.174274	0.406639	0.56639	0.13693	0.634855	0.143153	0.845933	0.23444	0.278008	0.452282	0.591286	0.315353	0.408714	0.282157	1.56224	0.466805
TCGA-AC-A2FG	low	0.279245	0.358208	0.325472	0.368868	0.227358	0.479245	0.478302	0.0499999	0.325472	0.0990565	0.739019	0.161321	0.231132	0.368868	0.548113	0.196226	0.361321	0.246226	0.819811	0.257547
TCGA-AC-A2FK	low	0.18609	0.19391	0.142857	0.131579	0.0187969	0.246241	0.25188	0.0244359	0.129699	0.0300753	0.287049	0.0845865	0.075188	0.112782	0.240602	0.0582707	0.110902	0.0958645	0.37594	0.105263
TCGA-AC-A2FO	low	0.588489	0.624907	0.489209	0.620144	0.185612	0.517986	0.716547	0.0892088	0.418705	0.13813	0.717727	0.218705	0.211511	0.575539	0.638849	0.313669	0.435971	0.123741	1.46043	0.654676
TCGA-AC-A2QI	low	0.276029	0.328463	0.301453	0.493947	0.153753	0.598063	0.394673	0.0653754	0.349879	0.0968523	0.320012	0.243341	0.181598	0.391041	0.623487	0.181598	0.489104	0.14891	0.783293	0.245763
TCGA-AC-A3BB	low	0.509464	0.463786	0.712934	0.640378	0.175079	0.790221	0.484227	0.157729	0.452681	0.0930598	1.00005	0.178234	0.233438	0.511041	0.845426	0.323344	0.600946	0.301262	1.41798	0.753943
TCGA-AC-A3QP	low	0.158596	0.298789	0.353511	0.738499	0.112591	0.590799	0.329298	0.0786925	0.243341	0.0375302	0.542203	0.106538	0.128329	0.336562	0.581114	0.150121	0.508475	0.157385	0.662228	0.443099
TCGA-AC-A3TN	low	0.186698	0.354831	0.347725	0.767795	0.305718	0.719953	0.395566	0.0875146	0.257876	0.0443407	0.68224	0.158693	0.207701	0.394399	0.864644	0.217036	0.380397	0.270712	0.871645	0.645274
TCGA-AC-A3YI	low	0.215054	0.265269	0.225807	0.321045	0.248848	0.403994	0.259601	0.0445468	0.261137	0.0568356	0.52318	0.184332	0.142857	0.230415	0.488479	0.259601	0.247312	0.213518	0.660522	0.322581
TCGA-AC-A3YJ	low	0.269949	0.675959	0.567063	1.03396	0.235993	0.578947	0.490662	0.159592	0.39219	0.152801	1.06621	0.334465	0.336163	0.539898	0.86927	0.249576	0.792869	0.186757	1.26655	0.891341
TCGA-AN-A0FS	low	0.291319	0.570042	0.521703	0.707846	0.25793	0.664441	0.603506	0.0984974	0.4399	0.142738	1.02987	0.24207	0.323873	0.487479	0.946577	0.248748	0.437395	0.357262	1.48748	0.424875
TCGA-AN-A0XT	low	0.343434	0.157942	0.460858	0.666667	0.054293	0.762626	0.436869	0.054293	0.531566	0.0833333	1.01356	0.156566	0.194444	0.334596	0.959596	0.248737	0.510101	0.261364	1.73737	0.522727
TCGA-AO-A0JG	low	0.461753	0.518192	0.35605	0.311544	0.0862307	0.324061	0.500695	0.0667595	0.301808	0.100139	0.980918	0.148818	0.251739	0.38943	0.689847	0.307372	0.354659	0.171071	1.14743	0.244785
TCGA-AO-A12C	low	0.688331	0.657858	0.632201	0.686854	0.082718	0.542097	0.469719	0.144756	0.409158	0.0782864	1.23357	0.20384	0.354505	0.686854	0.672083	0.25997	0.781388	0.186115	1.61004	0.646972
TCGA-AO-A1KO	low	0.185729	0.228478	0.165792	0.521511	0.032529	0.213012	0.257083	0.0503673	0.0944386	0.0283315	0.289507	0.0881426	0.089192	0.104932	0.103882	0.0724028	0.0996852	0.0786988	0.293809	0.0818469
TCGA-AQ-A1H2	low	0.361507	0.225254	0.400204	0.737271	0.291242	0.907332	0.627291	0.132383	0.406314	0.131365	1.00421	0.310591	0.250509	0.657841	0.271894	0.275968	0.539715	0.319755	1.87475	0.747454
TCGA-AR-A0TR	low	0.611054	0.291065	0.408393	0.651996	0.0777893	0.408393	0.580348	0.0767656	0.270215	0.0767656	0.483193	0.128966	0.299897	0.461617	0.941658	0.16479	0.561924	0.0767656	1.37052	0.362334
TCGA-AR-A1AM	low	0.208885	0.203488	0.198488	0.411153	0.0396976	0.375236	0.330813	0.0406427	0.151229	0.0491494	0.431607	0.088847	0.121928	0.297732	0.571834	0.140832	0.376182	0.13327	0.649338	0.256144
TCGA-AR-A24W	low	0.25183	0.160981	0.193265	0.275256	0.0658858	0.358712	0.34407	0.045388	0.212299	0.140556	0.772606	0.0922399	0.115666	0.286969	0.358712	0.0819914	0.247438	0.103953	1.40996	0.190337
TCGA-AR-A2LM	low	0.447368	0.368913	0.283753	0.394737	0.152174	0.475972	0.3627	0.0743707	0.312357	0.0858122	0.350423	0.160183	0.172769	0.342105	0.461098	0.288329	0.290618	0.195652	1.06636	0.257437
TCGA-AR-A2LN	low	0.143137	0.181745	0.0686275	0.194118	0.0333335	0.211765	0.241177	0.0823528	0.115686	0.0196078	0.262843	0.064706	0.0686275	0.196079	0.27451	0.0431372	0.137255	0.0686275	0.352941	0.12549
TCGA-AR-A2LQ	low	0.748918	0.782208	0.714286	0.558441	0.19697	0.621212	0.590909	0.0670997	0.623377	0.175325	1.51474	0.348485	0.547619	0.692641	0.829004	0.571429	0.900433	0.270563	1.77489	0.536796
TCGA-B6-A0IH	low	0.27833	0.113678	0.190855	0.204772	0.0497017	0.552684	0.465209	0.00795217	0.0894634	0.0258448	0.307237	0.0815108	0.0854871	0.16501	0.125249	0.12326	0.109344	0.0695823	1.04175	0.12326
TCGA-B6-A0RN	low	0.173601	0.272425	0.296987	0.312769	0.0272597	0.404591	0.467719	0.0530848	0.186514	0.055954	0.429656	0.104735	0.146341	0.335725	0.463415	0.149211	0.236729	0.18221	0.949785	0.271162
TCGA-B6-A0RP	low	0.406704	0.647229	0.418994	0.601117	0.0938546	0.422346	0.487151	0.135196	0.502793	0.0837987	0.962994	0.22905	0.301676	0.46257	0.755307	0.249162	0.719553	0.205586	1.4324	0.521788
TCGA-B6-A0RQ	low	0.101351	0.200259	0.147523	0.199324	0.0484234	0.255631	0.18018	0.0427929	0.125	0.0247748	0.246892	0.0450452	0.131757	0.15991	0.283784	0.0472972	0.233108	0.0889639	0.388514	0.140766
TCGA-B6-A0X4	low	0.198661	0.353259	0.466518	0.410714	0.0982142	0.404018	0.488839	0.109375	0.323661	0.0758927	0.901005	0.261161	0.232143	0.321429	0.571429	0.169643	0.428571	0.116072	1.1942	0.381696
TCGA-B6-A0X7	low	0.392736	0.566288	0.392736	0.713962	0.0976163	0.4563	0.600454	0.143019	0.406357	0.124858	0.729138	0.231555	0.350738	0.522134	0.827469	0.224745	0.558456	0.138479	1.67991	0.574347
TCGA-B6-A1KI	low	0.391201	0.314697	0.2283	0.401902	0.180737	0.541023	0.372176	0.079667	0.296076	0.0749108	0.943983	0.252081	0.217598	0.353151	0.605232	0.323424	0.349584	0.263971	1.35077	0.476813
TCGA-BH-A0BM	low	0.143969	0.363852	0.190661	0.439688	0.0350195	0.217899	0.463035	0.0544747	0.268482	0.0661477	0.374864	0.151751	0.132296	0.171206	0.206226	0.0778213	0.0778213	0.0817121	0.638132	0.303502
TCGA-BH-A0BO	low	0.235543	0.235642	0.197461	0.217207	0.0818053	0.253879	0.231312	0.0225671	0.306065	0.0803948	0.557673	0.12835	0.0902679	0.205924	0.466855	0.19323	0.126939	0.150917	0.622003	0.15938
TCGA-BH-A0DO	low	0.32829	0.287398	0.249622	0.287443	0.119516	0.352496	0.334342	0.0378217	0.183056	0.0635402	0.549713	0.143722	0.146747	0.237519	0.411498	0.167927	0.276853	0.181543	0.626324	0.23298
TCGA-BH-A0DV	low	0.493412	0.387979	0.469985	0.644216	0.102489	0.465593	0.36164	0.0541728	0.418741	0.0439238	0.821288	0.169839	0.168375	0.409956	0.704246	0.254759	0.404099	0.306003	1.4612	0.366032
TCGA-BH-A0E7	low	0.750444	0.502886	0.48579	0.706927	0.145648	0.675844	0.599467	0.148313	0.651865	0.138543	1.2097	0.248668	0.356128	0.547957	0.717584	0.320604	0.854352	0.258437	1.873	0.337478
TCGA-BH-A0EA	low	0.182418	0.190198	0.147253	0.0967035	0.0439559	0.265934	0.349451	0.0219782	0.114286	0.0175824	0.497451	0.10989	0.0659341	0.147253	0.204395	0.0263736	0.171428	0.10989	0.606593	0.116484
TCGA-BH-A0H3	low	0.561878	0.492845	0.348507	0.433855	0.153628	0.668563	0.601707	0.0725461	0.537695	0.108108	0.852987	0.224751	0.234708	0.516359	0.662873	0.389758	0.415362	0.251778	1.30014	0.331436
TCGA-BH-A1ET	low	0.481054	0.365346	0.327842	0.261944	0.0782537	0.340198	0.418451	0.0963756	0.39374	0.107908	0.606903	0.121087	0.187809	0.336903	0.327842	0.271829	0.254531	0.162273	0.897858	0.234761
TCGA-BH-A1FB	low	0.649188	0.677466	0.541823	0.619226	0.178527	0.609238	0.514357	0.141074	0.559301	0.122347	0.864295	0.322097	0.27965	0.619226	0.595506	0.35955	0.722846	0.278402	1.56804	0.37578
TCGA-BH-A1FH	low	0.8	0.367056	0.545341	0.320497	0.134161	0.382609	0.481987	0.103106	0.239751	0.0658384	0.630012	0.197515	0.109317	0.464596	0.378882	0.204969	0.414907	0.0931677	0.736646	0.27205
TCGA-BH-A28O	low	0.17099	0.198455	0.165094	0.29717	0.0707546	0.252359	0.176887	0.0271228	0.135613	0.0507077	0.378561	0.119104	0.0660379	0.15684	0.373821	0.0837263	0.1875	0.120283	0.39033	0.17217
TCGA-BH-A28Q	low	0.546578	0.374116	0.369772	0.553232	0.103612	0.341255	0.446768	0.0703421	0.301331	0.0769963	0.537282	0.175855	0.157795	0.311787	0.396388	0.318441	0.332699	0.172053	1.42776	0.414449
TCGA-BH-A42U	low	0.174359	0.217457	0.269744	0.382564	0.0923078	0.438974	0.190769	0.0471796	0.150769	0.0379488	0.477815	0.105641	0.14359	0.204103	0.588718	0.135385	0.24	0.108718	0.531282	0.350769
TCGA-BH-A42V	low	0.237937	0.399551	0.27371	0.549085	0.14975	0.429285	0.299501	0.0931781	0.274542	0.0698836	0.593652	0.216306	0.178037	0.388519	0.725458	0.157238	0.366057	0.154742	0.784526	0.389351
TCGA-BH-A8G0	low	0.168269	0.274102	0.206731	0.214744	0.113782	0.283654	0.280449	0.0432691	0.209936	0.0496796	0.442404	0.157051	0.125	0.174679	0.370192	0.0753204	0.219551	0.112179	0.613782	0.189102
TCGA-C8-A12N	low	0.573771	0.575306	0.678093	0.959762	0.14009	0.546945	0.533532	0.205663	0.612519	0.120715	0.877839	0.305514	0.390462	0.776453	0.852459	0.400894	0.734724	0.280179	1.76304	0.739195
TCGA-D8-A1JB	low	0.638462	0.493092	0.38	0.384615	0.216923	0.54	0.458462	0.0861537	0.401539	0.110769	0.714492	0.210769	0.173846	0.387692	0.444615	0.270769	0.530769	0.141539	1.18923	0.601538
TCGA-D8-A1JH	low	0.562738	0.676407	0.576046	0.585551	0.18346	0.44962	0.554183	0.118821	0.486692	0.147339	0.785761	0.30038	0.323194	0.612167	0.717681	0.290875	0.461977	0.214829	1.52757	0.36692
TCGA-D8-A1JN	low	0.216312	0.34789	0.41312	0.356383	0.0992907	0.37234	0.519503	0.0460992	0.214539	0.069149	0.75383	0.125886	0.276596	0.253546	0.430851	0.189716	0.237589	0.219858	0.822695	0.343972
TCGA-D8-A1JS	low	0.119804	0.348509	0.458435	0.668704	0.209046	0.48044	0.566014	0.149144	0.309291	0.0709046	0.923924	0.212714	0.275061	0.526895	0.731051	0.200489	0.44132	0.179707	0.9022	0.573349
TCGA-D8-A1JU	low	0.0993939	0.183358	0.100606	0.16606	0.0254543	0.178182	0.219394	0.0363637	0.112727	0.0266668	0.199091	0.0872728	0.0703029	0.179394	0.16606	0.0666665	0.153939	0.0909092	0.332121	0.0872728
TCGA-D8-A1XY	low	0.211573	0.223617	0.15642	0.122062	0.126582	0.374322	0.179023	0.034358	0.256781	0.0587703	0.180054	0.112116	0.0768536	0.160036	0.337251	0.17179	0.266727	0.143761	0.830018	0.210669
TCGA-D8-A27E	low	0.256571	0.338536	0.232791	0.261577	0.0500624	0.314143	0.340426	0.0488111	0.270338	0.0738422	0.791202	0.155194	0.150188	0.241552	0.872341	0.102628	0.232791	0.092616	0.770964	0.227785
TCGA-D8-A27V	low	0.54051	0.509722	0.252691	0.438527	0.212464	0.43796	0.492351	0.0498584	0.324646	0.150708	0.672736	0.155807	0.280453	0.524646	0.686119	0.38187	0.41813	0.240793	1.10368	0.445892
TCGA-D8-A3Z5	low	0.178533	0.265207	0.256111	0.465462	0.102019	0.42508	0.450584	0.0478214	0.156217	0.0403826	0.608842	0.119022	0.144527	0.270988	0.607864	0.113709	0.488842	0.112646	0.584485	0.306057
TCGA-D8-A4Z1	low	0.208599	0.408121	0.242038	0.421975	0.0955413	0.378981	0.41879	0.05414	0.259554	0.0589173	0.569331	0.237261	0.160828	0.261146	0.694268	0.144904	0.291401	0.0891719	0.788216	0.299363
TCGA-D8-A73U	low	0.379427	0.23403	0.215852	0.20742	0.11973	0.359191	0.234401	0.0640811	0.315346	0.0472174	0.704351	0.163575	0.183811	0.190556	0.426644	0.160202	0.397976	0.0876896	0.76054	0.161889
TCGA-D8-A73X	low	0.500536	0.530536	0.297963	0.876742	0.127546	0.49089	0.72776	0.145766	0.480172	0.154341	0.753998	0.192926	0.397642	0.587353	0.965702	0.302251	0.677385	0.150054	1.61736	0.535906
TCGA-E2-A14U	low	0.0587696	0.105767	0.0789715	0.191919	0.0679521	0.185491	0.138659	0.016529	0.0459137	0.0110194	0.234288	0.0495868	0.0348943	0.0771349	0.407713	0.0348943	0.203857	0.0606062	0.202939	0.0587696
TCGA-E2-A15C	low	0.445638	0.424846	0.385235	0.467114	0.0604027	0.618792	0.62953	0.13557	0.362416	0.0845638	0.749718	0.127517	0.218792	0.492617	0.583893	0.237584	0.57047	0.280537	1.94899	0.512752
TCGA-E2-A15D	low	0.4512	0.489696	0.6416	0.7728	0.1104	0.4928	0.5056	0.0784001	0.368	0.0704002	0.788896	0.1984	0.1408	0.328	0.5376	0.4832	0.5504	0.2208	1.1488	0.2784
TCGA-E2-A15G	low	0.361891	0.336204	0.370754	0.469719	0.0945347	0.440177	0.565731	0.0841951	0.423929	0.0561301	1.06746	0.141802	0.264402	0.401773	0.791728	0.242245	0.460857	0.175776	1.09453	0.27031
TCGA-E2-A1B4	low	0.170175	0.180325	0.244737	0.537719	0.045614	0.183333	0.404386	0.0754386	0.186842	0.040351	0.386859	0.174561	0.204386	0.311404	0.574561	0.114912	0.152632	0.109649	0.851754	0.392105
TCGA-E2-A1BC	low	0.144105	0.26345	0.157205	0.200874	0.0567686	0.222707	0.38428	0.026201	0.135371	0.0305676	0.291354	0.0567686	0.122271	0.388646	0.235808	0.126638	0.148471	0.117904	1.17904	0.122271
TCGA-E2-A3DX	low	0.483444	0.511258	0.357616	0.501987	0.249007	0.535099	0.490066	0.0940396	0.409272	0.125828	0.776848	0.260927	0.231788	0.503311	0.678146	0.26755	0.410596	0.250331	1.09007	0.406623
TCGA-E9-A1R3	low	0.0438755	0.0284552	0.0310785	0.037477	0.00365629	0.0932358	0.14351	0.00914073	0.0265081	0.0137111	0.038702	0.0146252	0.0118829	0.0402192	0.0484462	0.02468	0.0219378	0.0484462	0.101462	0.025594
TCGA-E9-A3Q9	low	0.195402	0.253563	0.192118	0.2578	0.0591132	0.208538	0.292283	0.0426931	0.224959	0.0541873	0.3711	0.114943	0.106732	0.144499	0.372742	0.0985221	0.201971	0.0722495	0.615764	0.198686
TCGA-E9-A5UP	low	0.163865	0.341765	0.193277	0.208683	0.116247	0.333333	0.210084	0.0714285	0.273109	0.0938376	0.472913	0.239496	0.154062	0.156863	0.337535	0.0994397	0.740896	0.082633	1.04622	0.348739
TCGA-EW-A1J2	low	0.363636	0.330131	0.307071	0.291919	0.059596	0.309091	0.39899	0.0727274	0.336364	0.0767677	0.485949	0.125253	0.137374	0.282828	0.39798	0.173737	0.262626	0.141414	0.725252	0.206061
TCGA-EW-A1PG	low	0.185255	0.186975	0.130435	0.249527	0.0245746	0.185255	0.219282	0.0359167	0.139887	0.0491492	0.294556	0.079395	0.0604916	0.16068	0.175803	0.151229	0.162571	0.0756142	0.497165	0.164461
TCGA-GI-A2C8	low	0.144418	0.167342	0.134709	0.150485	0.0376212	0.179612	0.188107	0.0194177	0.161408	0.0242717	0.267597	0.0946601	0.0570389	0.140777	0.131068	0.086165	0.168689	0.0594659	0.406553	0.101942
TCGA-GM-A2DM	low	0.313253	0.386762	0.388554	0.441265	0.126506	0.39759	0.370482	0.100904	0.364458	0.0617469	0.747605	0.191265	0.259036	0.34488	0.509036	0.228916	0.370482	0.200301	1.03916	0.376506
TCGA-GM-A3XG	low	0.108782	0.201876	0.214571	0.403194	0.0998003	0.297405	0.147705	0.0349301	0.0888223	0.038922	0.275878	0.0798403	0.0748504	0.154691	0.456088	0.0658684	0.205589	0.116766	0.416168	0.202595
TCGA-GM-A4E0	low	0.128079	0.316404	0.20936	0.238916	0.0492612	0.337439	0.118227	0.123153	0.238916	0.0665025	0.568399	0.174877	0.147783	0.182266	0.485222	0.157635	0.241379	0.0591134	0.566502	0.371921
TCGA-GM-A5PV	low	0.18806	0.364731	0.447761	0.708955	0.101492	0.416418	0.483582	0.0940299	0.364179	0.0910449	0.478866	0.195522	0.208955	0.440298	0.746269	0.220895	0.310448	0.313433	0.995522	0.701493
TCGA-GM-A5PX	low	0.129117	0.152833	0.0816864	0.110672	0.050066	0.230567	0.142293	0.0382083	0.0988142	0.0408432	0.218142	0.0434784	0.088274	0.0895916	0.129117	0.0487484	0.156785	0.0816864	0.316205	0.100132
TCGA-HN-A2OB	low	0.235192	0.236028	0.19338	0.350174	0.066202	0.320557	0.294425	0.0296168	0.207317	0.06446	0.402004	0.196864	0.108014	0.226481	0.461673	0.123694	0.214286	0.0993032	0.60453	0.231708
TCGA-OL-A5RU	low	0.278524	0.416376	0.360738	0.568792	0.201342	0.432886	0.392617	0.0570469	0.302014	0.102349	0.902718	0.229866	0.176175	0.369128	0.805369	0.228188	0.491611	0.135906	0.907718	0.325503
TCGA-OL-A5RX	low	0.272727	0.276656	0.303571	0.342532	0.155844	0.456169	0.282467	0.0827922	0.25974	0.0844155	0.601899	0.168831	0.11526	0.321429	0.576298	0.266234	0.305195	0.214286	0.86526	0.271104
TCGA-OL-A66N	low	0.168831	0.212634	0.285714	0.35807	0.25603	0.640074	0.332097	0.0946198	0.198516	0.0723563	0.696864	0.139146	0.142857	0.337662	0.426716	0.139146	0.476809	0.16512	0.847866	0.395176
TCGA-PL-A8LX	low	0.213663	0.224375	0.357558	0.331395	0.109012	0.459302	0.265988	0.0508722	0.209302	0.0595931	1.09214	0.114826	0.193314	0.202035	0.715116	0.164244	0.311047	0.305232	1.2907	0.481105
TCGA-WT-AB44	low	0.0408655	0.217428	0.0312501	0.125	0.016827	0.129808	0.204327	0.0192308	0.076923	0.0048077	0.198245	0.0192308	0.0841345	0.0384616	0.0697114	0.0384616	0.153846	0.0432693	0.153846	0.161058
TCGA-Z7-A8R5	low	0.0925324	0.324367	0.310065	0.459416	0.12013	0.409091	0.243506	0.0519481	0.219156	0.0438312	0.369675	0.12013	0.136364	0.159091	0.469156	0.10552	0.340909	0.136364	0.433442	0.371753
