# Supplementary material for: Characterization of the mechanism by which the RB/E2F pathway controls expression of the cancer genomic DNA deaminase APOBEC3B
Source: eLife. 2020 Sep 28;9:e61287. doi: 10.7554/eLife.61287 (PMC7553775; doi:10.7554/eLife.61287)
Supplement: Supplementary file 4. [file elife-61287-supp4.xlsx]

## Sheet: S4_Oligos used
Roelofs et al. 2020
Supplementary Table S4
	Primer name	Function	Sequence (5'-3')	Reference, if applicable
Oligos used for pLenti-CRISPR	RSH16684	pLenti-CRISPR_gRNA_A3B_1-50_#1_top	caccgCAGAGCTTCAAAAAAAGAGC
	RSH16685	pLenti-CRISPR_gRNA_A3B_1-50_#1_bottom	gaacGCTCTTTTTTTGAAGCTCTGc
	RSH16688	pLenti-CRISPR_gRNA_A3B_1-50_#3_top	caccggTTCAAAAAAAGAGCGGGACA
	RSH16689	pLenti-CRISPR_gRNA_A3B_1-50_#3_bottom	gaacTGTCCCGCTCTTTTTTTGAAcc
	RSH16741	pLenti-CRISPR_gRNA_LacZ_top	caccgTGCGAATACGCCCACGCGAT
	RSH16742	pLenti-CRISPR_gRNA_LacZ_bottom	gaacATCGCGTGGGCGTATTCGCAc
	RSH10020	pLenti-CRISPR_gRNA_A3A/B_top	CACCagcaggggggttgaatggagc
	RSH10021	pLenti-CRISPR_gRNA_A3A/B_bottom	aaacGCTCCATTCAACCCCCCTGCT
Synthetic gRNAs used	gRNA_50UTR#1	Introducing DSB during precision base substitution	CAGAGCTTCAAAAAAAGAGC
	gRNA_LacZ	Negative control during precision base substitution	CCCGAAUCUCUAUCGUGCGG
ssoDN	RSH16912	HDR-template for precision genome engineering (* = PS)	G*CAGGAGGGGCCCAGCAGGCAGAGTGGGCAGCGGTACCTGATCTGTGGATTCATGTTCAGCCTCTTAGATACGCTTGTCCCTGTGCCCCTCTTTTTTTGAAGCTCTGTGGTTTCACTTCCTGCTT*A	Design based on: Richardson, 2016, PMID: 26789497
Genotyping primers for MCF10A hemizygote	RSH3037	Validating hemizygote MCF10A cel line	TAGGTGCCACCCCGAT	Kidd et al., 2007, PMID:17447845
	RSH3038	Validating hemizygote MCF10A cel line	TTGAGCATAATCTTACTCTTGTAC	Kidd et al., 2007, PMID:17447845
	RSH3039	Validating hemizygote MCF10A cel line	TTGGTGCTGCCCCCTC	Kidd et al., 2007, PMID:17447845
	RSH3040	Validating hemizygote MCF10A cel line	TAGAGACTGAGGCCCAT	Kidd et al., 2007, PMID:17447845
	RSH14061	Screening for A3B promoter mutations	TTGCAATTCCGTTGGGTCCT
	RSH14062	Screening for A3B promoter mutations	CCTGACTGGGATTCGTGTGG
Cloning and sequencing	RSH13836	Adding KpnI site to -900 +50 FWD	NNNNGGTACCCACGCATCCTCCTCCC
	RSH13831	Adding NheI site to -900 +50 REV	NNNNGCTAGCGCCTCTTAGATACGCTTGTCC
	RSH4467	Validation after SDM of pA3B-luciferase FWD	CTAGCAAAATAGGCTGTCCC
	RSH4468	Validation after SDM of pA3B-luciferase REV	CTTTATGTTTTTGGCGTCTTCCA
	RSH2313	pJET1.2 cloning, sequencing FWD	CGACTCACTATAGGGAGAGCGGC
	RSH2314	pJET1.2 cloning, sequencing REV	AAGAACATCGATTTTCCATGGCAG
	RSH1360	Adding 5' EcoRI to mCherry-T2A-MCS	NNNNGAATTCATGGTGAGCAAGGGCGAGGA
	RSH16769	Adding 3' BamHI to mCherry-T2A-MCS	NNNNggatccAGGGCCGGGATTCTCCTCC
	RSH14678	Adding N-terminal HA-tag to E2Fs FWD	CTAGCGTTTACCACCATGGCCTACCCCTACGACGTGCCCGACTACGCCTCCCTCC
	RSH14679	Adding N-terminal HA-tag to E2Fs REV	TTAAGGAGGGAGGCGTAGTCGGGCACGTCGTAGGGGTAGGCCATGGTGGTAAACG
	RSH17006	Adding 5' NheI to HA-E2Fs, to place into pLenti4/TO-mCherry-T2A-MCS	NNNNGCTAGCTACCCCTACGACGTGCCCGAC
	RSH12014	Adding 3' AgeI to HA-E2Fs, to place into pLenti4/TO-mCherry-T2A-MCS	AGGCCTACCGGTCCATAGAGCCCACCGCATC
	RSH14902	Sequencing HA-E2F in pLenti4/TO-mCherry-T2A-MCS	GGTGGGAGGTCTATATAAGCAGAGC
	RSH15218	Sequencing HA-E2F in pLenti4/TO-mCherry-T2A-MCS	ACCCTAACTGACACACATTCC
	RSH1263	Sequencing HA-E2F in pLenti4/TO-mCherry-T2A-MCS	CACCATCGTGGAACAGTACGAAC
qPCR primers	RSH3220	A3B qPCR primer, FWD	GACCCTTTGGTCCTTCGAC
	RSH3221	A3B qPCR primer, REV	GCACAGCCCCAGGAGAAG
	RSH3231	TBP qPCR primer, FWD	cccatgactcccatgacc
	RSH3232	TBP qPCR primer, REV	tttacaaccaagattcactgtgg
	RSH17341	A3B ChIP qPCR primer, FWD	GGTCACTTTAAGGAGGGCTGT	Periyasamy et al. 2017. PMID: 28977491
	RSH17342	A3B ChIP qPCR primer, REV	TAGATACGCTTGTCCCTGTCC	Periyasamy et al. 2017. PMID: 28977491
	RSH17152	RAD51 ChIP qPCR primer, FWD	GAGGCGGGGATACGTTAC	Müller, et al. 2017. PMID: 29228647
	RSH17153	RAD51 ChIP qPCR primer, REV	CTCCTTAGGGCTCGGTCTCT	Müller, et al. 2017. PMID: 29228647
	RSH17154	TTK ChIP qPCR primer, FWD	TCACGACTGTCGCTTCTACG	Müller, et al. 2017. PMID: 29228647
	RSH17155	TTK ChIP qPCR primer, REV	GCTGGGGAAATGAAAAGATG	Müller, et al. 2017. PMID: 29228647
	RSH2742	A3A qPCR primer, FWD	gagaagggacaagcacatgg	Refsland, et al. 2010, PMID: 20308164
	RSH2743	A3A qPCR primer, REV	tggatccatcaagtgtctgg	Refsland, et al. 2010, PMID: 20308164
	RSH3085	A3C qPCR primer, FWD	AGCGCTTCAGAAAAGAGTGG	Refsland, et al. 2010, PMID: 20308164
	RSH3086	A3C qPCR primer, REV	AAGTTTCGTTCCGATCGTTG	Refsland, et al. 2010, PMID: 20308164
	RSH2749	A3D qPCR primer, FWD	acccaaacgtcagtcgaatc	Refsland, et al. 2010, PMID: 20308164
	RSH2750	A3D qPCR primer, REV	cacatttctgcgtggttctc	Refsland, et al. 2010, PMID: 20308164
	RSH2751	A3F qPCR primer, FWD	ccgtttggacgcaaagat	Refsland, et al. 2010, PMID: 20308164
	RSH2752	A3F qPCR primer, REV	ccaggtgatctggaaacactt	Refsland, et al. 2010, PMID: 20308164
	RSH2753	A3G qPCR primer, FWD	ccgaggacccgaaggttac	Refsland, et al. 2010, PMID: 20308164
	RSH2754	A3G qPCR primer, REV	tccaacagtgctgaaattcg	Refsland, et al. 2010, PMID: 20308164
	RSH2757	A3H qPCR primer, FWD	agctgtggccagaagcac	Refsland, et al. 2010, PMID: 20308164
	RSH2758	A3H qPCR primer, REV	cggaatgtttcggctgtt	Refsland, et al. 2010, PMID: 20308164
Oligos used for site-directed mutagenesis	RSH14411	SDM A3B 5'UTR(-578) E2F SDM CC>TA (site A) FWD	GGCTGACCTGCTACCCACCTTCTGG
	RSH14412	SDM A3B 5'UTR(-578) E2F SDM CC>TA (site A) REV	CCAGAAGGTGGGTAGCAGGTCAGCC
	RSH14100	SDM A3B 5'UTR(-460) E2F SDM CC>TA (site B) FWD	GAGTCCACACTTTATTCCCCACTGG
	RSH14101	SDM A3B 5'UTR(-460) E2F SDM CC>TA (site B) REV	CCAGTGGGGAATAAAGTGTGGACTC
	RSH14098	SDM A3B 5'UTR(-355) E2F SDM CC>TA (site C) FWD	GAGAGGGGGCTTAAGCCTGCCCAAC
	RSH14099	SDM A3B 5'UTR(-355) E2F SDM CC>TA (site C) REV	GTTGGGCAGGCTTAAGCCCCCTCTC
	RSH14096	SDM A3B 5'UTR(-180) E2F SDM CG>AT (site D) FWD	GTTCCTCTGCCAGATGGAAGGGTCCGG
	RSH14097	SDM A3B 5'UTR(-180) E2F SDM CG>AT (site D) REV	CCGGACCCTTCCATCTGGCAGAGGAAC
	RSH14092	SDM A3B 5'UTR(+22) E2F SDM CG>AT (site E) FWD	CTTCAAAAAAAGAGATGGACAGGGACAAG
	RSH14093	SDM A3B 5'UTR(+22) E2F SDM CG>AT (site E) REV	CTTGTCCCTGTCCATCTCTTTTTTTGAAG
	RSH13821	SDM A3B 5'UTR(+1/+10) E2F SDM FWD	GCAGGAAGTGAAACCTCTGCGATACAAAAAAAGAGCGGG
	RSH13822	SDM A3B 5'UTR(+1/+10) E2F SDM REV	CCCGCTCTTTTTTTGTATCGCAGAGGTTTCACTTCCTGC
	RSH13823	SDM A3B 5'UTR(+11/+20) E2F SDM FWD	GAAACCACAGAGCTTCTACATAGGTGCGGGACAGGGACAAG
	RSH13824	SDM A3B 5'UTR(+11/+20) E2F SDM REV	CTTGTCCCTGTCCCGCACCTATGTAGAAGCTCTGTGGTTTC
	RSH13825	SDM A3B 5'UTR(+21/+30) E2F SDM FWD	GCTTCAAAAAAAGAGAGAGGCGGCGACAAGCGTATCTAAG
	RSH13826	SDM A3B 5'UTR(+21/+30) E2F SDM REV	CTTAGATACGCTTGTCGCCGCCTCTCTCTTTTTTTGAAGC
	RSH13827	SDM A3B 5'UTR(+31/+40) E2F SDM FWD	GAGCGGGACAGGGTCTAACCTGTCTAAGAGGCGC
	RSH13828	SDM A3B 5'UTR(+31/+40) E2F SDM REV	GCGCCTCTTAGACAGGTTAGACCCTGTCCCGCTC
	RSH13829	SDM A3B 5'UTR(+41/+50) E2F SDM FWD	GGACAAGCGTATGTGACACGAGCTAGCCCGGGC
	RSH13830	SDM A3B 5'UTR(+41/+50) E2F SDM REV	GCCCGGGCTAGCTCGTGTCACATACGCTTGTCC
	RSH16981	SDM A3B 5'UTR(+20) E2F SDM A>T FWD	GAAACCACAGAGCTTCAAAAAAAGTGCGGGACAGGGACAAG
	RSH16982	SDM A3B 5'UTR(+20) E2F SDM A>T REV	CTTGTCCCTGTCCCGCACTTTTTTTGAAGCTCTGTGGTTTC
	RSH16801	SDM A3B 5'UTR(+21) E2F SDM G>C FWD	CACAGAGCTTCAAAAAAAGACCGGGACAGGGACAAG
	RSH16802	SDM A3B 5'UTR(+21) E2F SDM G>C REV	CTTGTCCCTGTCCCGGTCTTTTTTTGAAGCTCTGTG
	RSH16613	SDM A3B 5'UTR(+22) E2F SDM C>G FWD	CAGAGCTTCAAAAAAAGAGGGGGACAGGGACAAGCG
	RSH16614	SDM A3B 5'UTR(+22) E2F SDM C>G REV	CGCTTGTCCCTGTCCCCCTCTTTTTTTGAAGCTCTG
	RSH16805	SDM A3B 5'UTR(+23) E2F SDM G>C FWD	CAGAGCTTCAAAAAAAGAGCCGGACAGGGACAAGCG
	RSH16806	SDM A3B 5'UTR(+23) E2F SDM G>C REV	CGCTTGTCCCTGTCCGGCTCTTTTTTTGAAGCTCTG
	RSH16795	SDM A3B 5'UTR (CHR) E2F SDM TTCAAA>TCTAAA	GAAGTGAAACCACAGAGCTCTAAAAAAAGAGCGGGACAG
	RSH16796	SDM A3B 5'UTR (CHR) E2F SDM TTCAAA>TCTAAA	CTGTCCCGCTCTTTTTTTAGAGCTCTGTGGTTTCACTTC
	RSH16987	SDM A3B 5'UTR (CHR) E2F SDM TTCAAA>AACAAA	GTAAGCAGGAAGTGAAACCACAGAGCAACAAAAAAAGAGCGGGACAGGGAC
	RSH16988	SDM A3B 5'UTR (CHR) E2F SDM TTCAAA>AACAAA	GTCCCTGTCCCGCTCTTTTTTTGTTGCTCTGTGGTTTCACTTCCTGCTTAC
	RSH16989	SDM A3B 5'UTR (CHR) E2F SDM TTCAAA>AACATT	GTAAGCAGGAAGTGAAACCACAGAGCAACATTAAAAGAGCGGGACAGGGAC
	RSH16990	SDM A3B 5'UTR (CHR) E2F SDM TTCAAA>AACATT	GTCCCTGTCCCGCTCTTTTAATGTTGCTCTGTGGTTTCACTTCCTGCTTAC
	RSH16993	SDM A3B 5'UTR (CHR) E2F SDM TTCAAA>TTCATT	GCAGGAAGTGAAACCACAGAGCTTCATTAAAAGAGCGGGACAGGGAC
	RSH16994	SDM A3B 5'UTR (CHR) E2F SDM TTCAAA>TTCATT	GTCCCTGTCCCGCTCTTTTAATGAAGCTCTGTGGTTTCACTTCCTGC
Oligos used for SILAC	APOBEC3B promoter wt forward	WT bait for SILAC experiments	GTGAAACCACAGAGCTTCAAAAAAAGAGCGGGACAGGGACAAGCGTATCTAAGAGGC
	APOBEC3B promoter wt reverse	WT bait for SILAC experiments	ACGCCTCTTAGATACGCTTGTCCCTGTCCCGCTCTTTTTTTGAAGCTCTGTGGTTTC
	APOBEC3B promoter CHR mut (SDM2) forward	CHR mutant bait for SILAC experiments	GTGAAACCACAGAGCTTCTACATAGGTGCGGGACAGGGACAAGCGTATCTAAGAGGC
	APOBEC3B promoter CHR mut (SMD2) reverse	CHR mutant bait for SILAC experiments	ACGCCTCTTAGATACGCTTGTCCCTGTCCCGCACCTATGTAGAAGCTCTGTGGTTTC
	APOBEC3B promoter E2F mut (SDM3) forward	E2F mutant bait for SILAC experiments	GTGAAACCACAGAGCTTCAAAAAAAGAGAGAGGCGGCGACAAGCGTATCTAAGAGGC
	APOBEC3B promoter E2F mut (SDM3) reverse	E2F mutant bait for SILAC experiments	ACGCCTCTTAGATACGCTTGTCGCCGCCTCTCTCTTTTTTTGAAGCTCTGTGGTTTC
	APOBEC3B promoter C22G forward	22CtoG mutant bait for SILAC experiments	GTGAAACCACAGAGCTTCAAAAAAAGAGGGGGACAGGGACAAGCGTATCTAAGAGGC
	APOBEC3B promoter C22G reverse	22CtoG mutant bait for SILAC experiments	ACGCCTCTTAGATACGCTTGTCCCTGTCCCCCTCTTTTTTTGAAGCTCTGTGGTTTC
